# Supplementary material for: TNO-MACC_II emission inventory; a multi-year (2003–2009) consistent high-resolution European emission inventory for air quality modelling
Source: Copernicus journal article supplement (doi:10.5194/acp-14-10963-2014), 2014-10-17
Supplement: Supplementary file 1 [file 1_Link table for reported emissions.xlsx]

## Sheet: Sheet1
Sector No.	Sector Name	NFR09 sectors (for air pollutants)	CRF sectors (for CH4 only)
1.1	Power plants	1.A.1.a	1.A.1.a
1.2	Refineries	1.A.1.b, 1.B.2.a.iv	1.A.1.b
2.1	Residential combustion (including commercial/institutional)	1.A.4.a.i, 1.A.4.b.i, 1.A.5.a	1.A.4.a, 1.A.4.b, 1.A.5.a
2.2	Agricultural stationary combustion	1.A.4.c.i	1.A.4.c
34.1	Iron and steel industry (including coke ovens)	1.A.1.c, 1.A.2.a, 1.B.1.b, 2.C.1, 2.C.2	1.A.1.c, 1.A.2.a, 2.C.1, 2.C.2
34.2	Non-ferrous metal industry	1.A.2.b, 2.C.3, 2.C.5	1.A.2.b
34.3	Chemical industry	1.A.2.c, 2.B, 2.E	1.A.2.c, 2.B
34.4	Paper and pulp industry	1.A.2.d, 2.D.1	1.A.2.d
34.5	Cement industry	2.A.1
34.6	Other non-metallic minerals industry	2.A (except 2.A.1 and 2.A.7.c)
34.7	Storage and handling in industry	2.A.7.c, 2.B.5.b, 2.C.5.f
34.8	Other industries	1.A.2.e, 1.A.2.f.i, 2.D (except 2.D.1), 2.F, 2.G	1.A.2.e, 1.A.2.f, 2.G
5.1	Coal production	1.B.1.a, 1.B.1.c, 1.B.3	1.B.1, 2.A.7
5.2	Oil production	1.B.2.a.i	1.B.2.a
5.3	Gas production	1.B.2.b, 1.A.3.e	1.A.3.e, 1.B.2.b
5.4	Gasoline distribution	1.B.2.a.v
5.5	Flaring	1.B.2.c
6.1	Solvent and other product use	3.A, 3.B, 3.C, 3.D
7.1	Road transport, light duty vehicles	1.A.3.b.i, 1.A.3.b.ii	1.A.3.b (split in 7.1, 7.2 and 7.3 using energy consumption in each sector according to GAINS)
7.2	Road transport, heavy duty vehicles	1.A.3.b.ii
7.3	Road transport, mopeds and motorcycles	1.A.3.b.iv
7.4	Road transport, gasoline evaporation	1.A.3.b.v
7.5	Road transport, wear	1.A.3.b.vi, 1.A.3.b.vii
8.1	Air transport (<1000m)	1.A.3.a	1.A.3.a
8.2	Rail transport	1.A.3.c	1.A.3.b
8.3	Navigation, non-international	1.A.3.d.i.(ii), 1.A.3.d.ii, 1.A.4.c.iii	1.A.3.d
8.4	Mobile machinery, agriculture	1.A.4.c.ii
8.5	Mobile machinery, industry	1.A.2.f.ii
8.6	Other mobile sources	1.A.4.a.ii, 1.A.4.b.ii, 1.A.5.b	1.A.5.b
9.1	Landfills	6.A	6.A
9.2	Controlled waste incineration	6.C.a, 6.C.b, 6.C.c	6.C
9.3	Other waste treatment	6.B, 6.C.d, 6.C.e, 6.D	6.B, 6.D
10.1	Livestock, Cattle	4.B.1, 4.B.2	4.A.1, 4.A.2, 4.B.1, 4.B.2
10.2	Livestock, Poultry	4.B.9	4.A.9, 4.A.10, 4.B.9, 4.B.10
10.3	Livestock, Sheep	4.B.3	4.A.3, 4.B.3
10.4	Livestock, Goats	4.B.4	4,A,4, 4.B.4
10.5	Livestock, Pigs	4.B.8	4.A.8, 4.B.8
10.6	Livestock, Other animals	4.B.6, 4.B.7, 4.B.13	4.A.5, 4.A.6, 4.A.7, 4.B.5, 4.B.6, 4.B.7
10.7	Crops and pastures	4.D.1.a, 4.D.2.c
10.8	Agricultural waste burning	4.F	4.F
10.9	Rice cultivation		4.C
10.1	Storage and handling of agricultural products	4.D.2.b	4.D.1
10.11	Other agriculture	4.D.2.a, 4.G
