# Supplementary material for: TNO-MACC_II emission inventory; a multi-year (2003–2009) consistent high-resolution European emission inventory for air quality modelling
Source: Copernicus journal article supplement (doi:10.5194/acp-14-10963-2014), 2014-10-17
Supplement: Supplementary file 1 [file supplement-cover-letter.pdf › supplement-cover-letter.pdf]

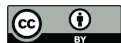

## *Supplement of*

# **TNO-MACC\_II emission inventory; a multi-year (2003–2009) consistent high-resolution European emission inventory for air quality modelling**

**J. J. P. Kuenen et al.**

*Correspondence to:* J. J. P. Kuenen ([jeroen.kuenen@tno.nl](mailto:jeroen.kuenen@tno.nl))

- Supplement-Cover-Letter.pdf
- Supplementary\_material
  - 1\_Link table for reported emissions.xlsx
  - 2\_Choice\_of\_emission\_source\_clean.xlsx
  - 3\_Sectors for spatial distribution.xlsx
  - 4\_Resulting\_emissions\_clean.xlsx
  - 5\_Emissions\_EC\_OC\_clean.xlsx
  - Readme\_Overview.txt
