# Supplementary material for: TNO-MACC_II emission inventory; a multi-year (2003–2009) consistent high-resolution European emission inventory for air quality modelling
Source: Copernicus journal article supplement (doi:10.5194/acp-14-10963-2014), 2014-10-17
Supplement: Supplementary file 3 [file 2_Choice_of_emission_source_clean.xlsx]

## Sheet: Emission_source_summary
This table shows the origin from which the emission data in TNO_MACC-II have been taken.
It should be noted that at sectoral level, changes have been made due to missing data, or problems identified in the data.
	CH4	CO	NH3	NMVOC	NOX	PM10	PM2.5	SO2
ALB	GAINS	CEIP	CEIP	CEIP	CEIP	CEIP	CEIP	CEIP
ARM	GAINS	TNO	GAINS	GAINS	GAINS	GAINS	GAINS	GAINS
AUT	EEA	CEIP	CEIP	CEIP	CEIP	CEIP	CEIP	CEIP
AZE	GAINS	TNO	GAINS	GAINS	GAINS	GAINS	GAINS	GAINS
BEL	EEA	CEIP	CEIP	CEIP	CEIP	CEIP	CEIP	CEIP
BGR	EEA	EEA	GAINS	GAINS	EEA	GAINS	GAINS	EEA
BIH	GAINS	TNO	GAINS	GAINS	GAINS	GAINS	GAINS	GAINS
BLR	GAINS	TNO	GAINS	GAINS	GAINS	GAINS	GAINS	GAINS
CHE	EEA	CEIP	CEIP	CEIP	CEIP	CEIP	CEIP	CEIP
CYP	EEA	CEIP	CEIP	CEIP	CEIP	CEIP	CEIP	CEIP
CZE	EEA	TNO	EEA	EEA	EEA	GAINS	GAINS	EEA
DEU	EEA	CEIP	CEIP	CEIP	CEIP	CEIP	CEIP	CEIP
DNK	EEA	CEIP	CEIP	CEIP	CEIP	CEIP	CEIP	CEIP
ESP	EEA	CEIP	CEIP	CEIP	CEIP	CEIP	CEIP	CEIP
EST	EEA	CEIP	CEIP	CEIP	CEIP	CEIP	CEIP	CEIP
FIN	EEA	CEIP	CEIP	CEIP	CEIP	CEIP	CEIP	CEIP
FRA	EEA	CEIP	CEIP	CEIP	CEIP	CEIP	CEIP	CEIP
GBR	EEA	CEIP	CEIP	CEIP	CEIP	CEIP	CEIP	CEIP
GEO	GAINS	TNO	GAINS	GAINS	GAINS	GAINS	GAINS	GAINS
GRC	EEA	EEA	EEA	EEA	EEA	GAINS	GAINS	EEA
HRV	GAINS	CEIP	CEIP	CEIP	CEIP	CEIP	CEIP	CEIP
HUN	EEA	EEA	EEA	EEA	EEA	EEA	EEA	EEA
IRL	EEA	CEIP	CEIP	CEIP	CEIP	CEIP	CEIP	CEIP
ISL	EEA	CEIP	GAINS	CEIP	CEIP	GAINS	GAINS	CEIP
ITA	EEA	CEIP	CEIP	CEIP	CEIP	CEIP	CEIP	CEIP
LTU	EEA	EEA	EEA	GAINS	EEA	EEA	EEA	EEA
LUX	EEA	TNO	EEA	GAINS	GAINS	GAINS	GAINS	GAINS
LVA	EEA	CEIP	CEIP	CEIP	CEIP	CEIP	CEIP	CEIP
MDA	GAINS	TNO	GAINS	GAINS	GAINS	GAINS	GAINS	GAINS
MKD	GAINS	TNO	GAINS	GAINS	GAINS	GAINS	GAINS	GAINS
MLT	EEA	TNO	CEIP	CEIP	EEA	CEIP	CEIP	EEA
NLD	EEA	CEIP	CEIP	CEIP	CEIP	CEIP	CEIP	CEIP
NOR	EEA	CEIP	CEIP	CEIP	CEIP	CEIP	CEIP	CEIP
POL	EEA	TNO	EEA	GAINS	GAINS	EEA	EEA	GAINS
PRT	EEA	CEIP	CEIP	CEIP	CEIP	CEIP	CEIP	CEIP
ROU	EEA	TNO	EEA	GAINS	EEA	GAINS	GAINS	GAINS
RUS	GAINS	TNO	GAINS	GAINS	GAINS	GAINS	GAINS	GAINS
SVK	EEA	CEIP	CEIP	CEIP	CEIP	CEIP	CEIP	CEIP
SVN	EEA	CEIP	CEIP	CEIP	CEIP	CEIP	CEIP	CEIP
SWE	EEA	CEIP	CEIP	CEIP	CEIP	CEIP	CEIP	CEIP
TUR	EEA	TNO	GAINS	GAINS	GAINS	GAINS	GAINS	GAINS
UKR	GAINS	TNO	GAINS	GAINS	GAINS	GAINS	GAINS	GAINS
YUG	GAINS	TNO	GAINS	GAINS	GAINS	GAINS	GAINS	GAINS

## Sheet: Emission_source_detail
This sheet provides the choice for the emission made at the most detailed sectoral level. For all years the same choice has been made to ensure consistency in time.
In a number of cases, missing years have been gapfilled by taking the average value of the two closest years.
Explanation of symbols:
RC = Reported/CEIP; RE = Reported/EEA; G = GAINS; E = EDGAR; T = TNO estimate; XX = no emission
ISO3	Sector	SectorName	CH4	CO	NH3	NMVOC	NOX	PM10	PM2_5	SO2
AUT	1.1	Power plants	RE	RC	RC	RC	RC	RC	RC	RC
AUT	1.2	Refineries	XX	RC	RC	RC	RC	RC	RC	RC
AUT	2.1	Residential combustion (including commercial/institutional)	RE	RC	RC	RC	RC	RC	RC	RC
AUT	2.2	Agricultural stationary combustion	RE	RC	RC	RC	RC	RC	RC	RC
AUT	34.1	Iron and steel industry (including coke ovens)	RE	RC	RC	RC	RC	RC	RC	RC
AUT	34.2	Non-ferrous metal industry	RE	RC	RC	RC	RC	RC	RC	RC
AUT	34.3	Chemical industry	RE	RC	RC	RC	RC	RC	RC	RC
AUT	34.4	Paper and pulp industry	RE	RC	RC	RC	RC	RC	RC	RC
AUT	34.5	Cement industry	XX	XX	XX	XX	XX	RC	RC	XX
AUT	34.6	Other non-metallic minerals industry	XX	RC	XX	XX	XX	RC	RC	XX
AUT	34.7	Storage and handling in industry	XX	XX	XX	XX	XX	XX	XX	XX
AUT	34.8	Other industries	RE	RC	RC	RC	RC	RC	RC	RC
AUT	5.1	Coal production	RE	XX	XX	XX	XX	RC	RC	XX
AUT	5.2	Oil production	RE	XX	XX	RC	XX	XX	XX	XX
AUT	5.3	Gas production	RE	RC	RC	RC	RC	RC	RC	RC
AUT	5.4	Gasoline distribution	XX	XX	XX	RC	XX	XX	XX	XX
AUT	5.5	Flaring	XX	XX	XX	XX	XX	XX	XX	XX
AUT	6.1	Solvent and other product use	XX	XX	XX	RC	XX	RC	RC	XX
AUT	7.1	Road transport, light duty vehicles	RE	RC	RC	RC	RC	RC	RC	RC
AUT	7.2	Road transport, heavy duty vehicles	RE	RC	RC	RC	RC	RC	RC	RC
AUT	7.3	Road transport, mopeds and motorcycles	RE	RC	RC	RC	RC	XX	XX	RC
AUT	7.4	Road transport, gasoline evaporation	XX	XX	XX	RC	XX	XX	XX	XX
AUT	7.5	Road transport, wear	XX	XX	XX	XX	XX	RC	RC	XX
AUT	8.1	Air transport (<1000m)	RE	RC	RC	RC	RC	RC	RC	RC
AUT	8.2	Rail transport	RE	RC	RC	RC	RC	RC	RC	RC
AUT	8.3	Navigation, non-international	T	T	T	T	T	T	T	T
AUT	8.4	Mobile machinery, agriculture	XX	RC	RC	RC	RC	RC	RC	RC
AUT	8.5	Mobile machinery, industry	XX	RC	RC	RC	RC	RC	RC	RC
AUT	8.6	Other mobile sources	RE	RC	RC	RC	RC	RC	RC	RC
AUT	9.1	Landfills	RE	RC	RC	RC	XX	RC	RC	XX
AUT	9.2	Controlled waste incineration	RE	RC	RC	RC	RC	XX	XX	RC
AUT	9.3	Other waste treatment	RE	RC	RC	RC	RC	XX	XX	XX
AUT	10.1	Livestock, Cattle	RE	XX	RC	XX	RC	XX	XX	XX
AUT	10.2	Livestock, Poultry	RE	XX	RC	XX	RC	XX	XX	XX
AUT	10.3	Livestock, Sheep	RE	XX	RC	XX	RC	XX	XX	XX
AUT	10.4	Livestock, Goats	RE	XX	RC	XX	RC	XX	XX	XX
AUT	10.5	Livestock, Pigs	RE	XX	RC	XX	RC	XX	XX	XX
AUT	10.6	Livestock, Other animals	RE	XX	RC	XX	RC	XX	XX	XX
AUT	10.7	Crops and pastures	XX	XX	RC	XX	XX	XX	XX	XX
AUT	10.8	Agricultural waste burning	RE	RC	RC	RC	RC	RC	RC	RC
AUT	10.9	Rice cultivation	XX	XX	XX	XX	XX	XX	XX	XX
AUT	10.10	Storage and handling of agricultural products	RE	XX	XX	XX	XX	RC	RC	XX
AUT	10.11	Other agriculture	XX	XX	RC	RC	RC	RC	RC	XX
BEL	1.1	Power plants	RE	RC	RC	RC	RC	RC	RC	RC
BEL	1.2	Refineries	XX	RC	RC	RC	RC	RC	RC	RC
BEL	2.1	Residential combustion (including commercial/institutional)	RE	RC	RC	RC	RC	RC	RC	RC
BEL	2.2	Agricultural stationary combustion	RE	RC	RC	RC	RC	RC	RC	RC
BEL	34.1	Iron and steel industry (including coke ovens)	RE	RC	RC	RC	RC	RC	RC	RC
BEL	34.2	Non-ferrous metal industry	RE	RC	RC	RC	RC	RC	RC	RC
BEL	34.3	Chemical industry	RE	RC	RC	RC	RC	RC	RC	RC
BEL	34.4	Paper and pulp industry	RE	RC	RC	RC	RC	RC	RC	RC
BEL	34.5	Cement industry	XX	RC	XX	RC	RC	RC	RC	RC
BEL	34.6	Other non-metallic minerals industry	XX	RC	XX	RC	RC	RC	RC	RC
BEL	34.7	Storage and handling in industry	XX	RC	RC	RC	RC	RC	RC	RC
BEL	34.8	Other industries	RE	RC	RC	RC	RC	RC	RC	RC
BEL	5.1	Coal production	RE	XX	XX	XX	XX	XX	XX	XX
BEL	5.2	Oil production	XX	XX	XX	RC	XX	XX	XX	XX
BEL	5.3	Gas production	RE	RC	XX	RC	RC	XX	XX	XX
BEL	5.4	Gasoline distribution	XX	XX	XX	RC	XX	XX	XX	XX
BEL	5.5	Flaring	XX	RC	XX	RC	RC	XX	XX	RC
BEL	6.1	Solvent and other product use	XX	RC	RC	RC	RC	XX	XX	RC
BEL	7.1	Road transport, light duty vehicles	RE	RC	RC	RC	RC	RC	RC	RC
BEL	7.2	Road transport, heavy duty vehicles	RE	RC	RC	RC	RC	RC	RC	RC
BEL	7.3	Road transport, mopeds and motorcycles	RE	RC	RC	RC	RC	RC	RC	RC
BEL	7.4	Road transport, gasoline evaporation	XX	XX	XX	RC	XX	XX	XX	XX
BEL	7.5	Road transport, wear	XX	XX	XX	XX	XX	RC	RC	XX
BEL	8.1	Air transport (<1000m)	RE	RC	XX	RC	RC	RC	RC	RC
BEL	8.2	Rail transport	RE	RC	RC	RC	RC	RC	RC	RC
BEL	8.3	Navigation, non-international	T	T	T	T	T	T	T	T
BEL	8.4	Mobile machinery, agriculture	XX	RC	RC	RC	RC	RC	RC	RC
BEL	8.5	Mobile machinery, industry	XX	RC	RC	RC	RC	RC	RC	RC
BEL	8.6	Other mobile sources	RE	RC	RC	RC	RC	RC	RC	RC
BEL	9.1	Landfills	RE	XX	XX	RC	XX	RC	RC	XX
BEL	9.2	Controlled waste incineration	RE	RC	RC	RC	RC	RC	RC	RC
BEL	9.3	Other waste treatment	RE	RC	RC	RC	RC	RC	RC	RC
BEL	10.1	Livestock, Cattle	RE	XX	RC	XX	XX	RC	RC	XX
BEL	10.2	Livestock, Poultry	RE	XX	RC	XX	XX	RC	RC	XX
BEL	10.3	Livestock, Sheep	RE	XX	RC	XX	XX	XX	XX	XX
BEL	10.4	Livestock, Goats	RE	XX	RC	XX	XX	XX	XX	XX
BEL	10.5	Livestock, Pigs	RE	XX	RC	XX	XX	RC	RC	XX
BEL	10.6	Livestock, Other animals	RE	XX	RC	XX	XX	XX	XX	XX
BEL	10.7	Crops and pastures	XX	XX	RC	XX	XX	XX	XX	XX
BEL	10.8	Agricultural waste burning	RE	RC	RC	RC	RC	RC	RC	RC
BEL	10.9	Rice cultivation	XX	XX	XX	XX	XX	XX	XX	XX
BEL	10.10	Storage and handling of agricultural products	XX	XX	RC	XX	XX	XX	XX	XX
BEL	10.11	Other agriculture	XX	XX	XX	RC	XX	XX	XX	XX
CHE	1.1	Power plants	RE	RC	RC	RC	RC	RC	RC	RC
CHE	1.2	Refineries	RE	RC	RC	RC	RC	RC	RC	RC
CHE	2.1	Residential combustion (including commercial/institutional)	RE	RC	RC	RC	RC	RC	RC	RC
CHE	2.2	Agricultural stationary combustion	RE	RC	RC	RC	RC	RC	RC	RC
CHE	34.1	Iron and steel industry (including coke ovens)	RE	RC	RC	RC	RC	RC	RC	RC
CHE	34.2	Non-ferrous metal industry	RE	RC	RC	RC	RC	RC	RC	RC
CHE	34.3	Chemical industry	RE	RC	RC	RC	RC	RC	RC	RC
CHE	34.4	Paper and pulp industry	RE	RC	RC	RC	RC	RC	RC	RC
CHE	34.5	Cement industry	XX	RC	RC	RC	RC	RC	RC	RC
CHE	34.6	Other non-metallic minerals industry	XX	RC	XX	RC	RC	RC	RC	RC
CHE	34.7	Storage and handling in industry	XX	RC	XX	RC	RC	RC	RC	RC
CHE	34.8	Other industries	RE	RC	RC	RC	RC	RC	RC	RC
CHE	5.1	Coal production	RE	RC	XX	RC	RC	RC	RC	RC
CHE	5.2	Oil production	XX	XX	XX	XX	XX	XX	XX	XX
CHE	5.3	Gas production	RE	RC	RC	RC	RC	RC	RC	RC
CHE	5.4	Gasoline distribution	XX	XX	XX	RC	XX	XX	XX	XX
CHE	5.5	Flaring	XX	XX	XX	RC	XX	XX	XX	XX
CHE	6.1	Solvent and other product use	XX	RC	RC	RC	RC	RC	RC	RC
CHE	7.1	Road transport, light duty vehicles	RE	RC	RC	RC	RC	RC	RC	RC
CHE	7.2	Road transport, heavy duty vehicles	RE	RC	RC	RC	RC	RC	RC	RC
CHE	7.3	Road transport, mopeds and motorcycles	RE	RC	RC	RC	RC	XX	XX	RC
CHE	7.4	Road transport, gasoline evaporation	XX	XX	XX	RC	XX	XX	XX	XX
CHE	7.5	Road transport, wear	XX	XX	XX	XX	XX	RC	RC	XX
CHE	8.1	Air transport (<1000m)	RE	RC	XX	RC	RC	RC	RC	RC
CHE	8.2	Rail transport	RE	RC	RC	RC	RC	RC	RC	RC
CHE	8.3	Navigation, non-international	T	T	T	T	T	T	T	T
CHE	8.4	Mobile machinery, agriculture	XX	RC	RC	RC	RC	RC	RC	RC
CHE	8.5	Mobile machinery, industry	XX	RC	RC	RC	RC	RC	RC	RC
CHE	8.6	Other mobile sources	RE	RC	RC	RC	RC	RC	RC	RC
CHE	9.1	Landfills	RE	RC	RC	RC	RC	RC	RC	RC
CHE	9.2	Controlled waste incineration	RE	RC	RC	RC	RC	RC	RC	RC
CHE	9.3	Other waste treatment	RE	RC	RC	RC	RC	RC	RC	RC
CHE	10.1	Livestock, Cattle	RE	XX	RC	XX	RC	RC	RC	XX
CHE	10.2	Livestock, Poultry	RE	XX	RC	XX	RC	RC	RC	XX
CHE	10.3	Livestock, Sheep	RE	XX	RC	XX	RC	RC	RC	XX
CHE	10.4	Livestock, Goats	RE	XX	RC	XX	RC	RC	RC	XX
CHE	10.5	Livestock, Pigs	RE	XX	RC	XX	RC	RC	RC	XX
CHE	10.6	Livestock, Other animals	RE	XX	RC	XX	RC	RC	RC	XX
CHE	10.7	Crops and pastures	XX	XX	RC	XX	XX	XX	XX	XX
CHE	10.8	Agricultural waste burning	RE	RC	RC	RC	RC	RC	RC	RC
CHE	10.9	Rice cultivation	XX	XX	XX	XX	XX	XX	XX	XX
CHE	10.10	Storage and handling of agricultural products	XX	XX	XX	XX	XX	XX	XX	XX
CHE	10.11	Other agriculture	XX	XX	RC	XX	XX	XX	XX	XX
DEU	1.1	Power plants	RE	RC	RC	RC	RC	RC	RC	RC
DEU	1.2	Refineries	RE	RC	RC	RC	RC	RC	RC	RC
DEU	2.1	Residential combustion (including commercial/institutional)	RE	RC	RC	RC	RC	RC	RC	RC
DEU	2.2	Agricultural stationary combustion	RE	RC	RC	RC	RC	RC	RC	RC
DEU	34.1	Iron and steel industry (including coke ovens)	RE	RC	RC	RC	RC	RC	RC	RC
DEU	34.2	Non-ferrous metal industry	RE	RC	RC	RC	RC	RC	RC	RC
DEU	34.3	Chemical industry	RE	RC	RC	RC	RC	RC	RC	RC
DEU	34.4	Paper and pulp industry	RE	XX	XX	RC	RC	RC	RC	RC
DEU	34.5	Cement industry	XX	XX	RC	RC	RC	RC	RC	RC
DEU	34.6	Other non-metallic minerals industry	XX	XX	RC	RC	RC	RC	RC	RC
DEU	34.7	Storage and handling in industry	XX	XX	RC	RC	RC	RC	RC	RC
DEU	34.8	Other industries	RE	RC	RC	RC	RC	RC	RC	RC
DEU	5.1	Coal production	RE	XX	XX	XX	XX	XX	XX	XX
DEU	5.2	Oil production	RE	XX	XX	RC	XX	XX	XX	XX
DEU	5.3	Gas production	RE	RC	RC	RC	RC	RC	RC	RC
DEU	5.4	Gasoline distribution	XX	XX	XX	RC	XX	XX	XX	XX
DEU	5.5	Flaring	XX	RC	XX	RC	RC	XX	XX	RC
DEU	6.1	Solvent and other product use	XX	XX	RC	RC	XX	RC	RC	XX
DEU	7.1	Road transport, light duty vehicles	RE	RC	RC	RC	RC	RC	RC	RC
DEU	7.2	Road transport, heavy duty vehicles	RE	RC	RC	RC	RC	RC	RC	RC
DEU	7.3	Road transport, mopeds and motorcycles	RE	RC	RC	RC	RC	XX	XX	RC
DEU	7.4	Road transport, gasoline evaporation	XX	XX	XX	RC	XX	XX	XX	XX
DEU	7.5	Road transport, wear	XX	XX	XX	XX	XX	RC	RC	XX
DEU	8.1	Air transport (<1000m)	RE	RC	RC	RC	RC	RC	RC	RC
DEU	8.2	Rail transport	RE	RC	RC	RC	RC	RC	RC	RC
DEU	8.3	Navigation, non-international	T	T	T	T	T	T	T	T
DEU	8.4	Mobile machinery, agriculture	XX	RC	RC	RC	RC	RC	RC	RC
DEU	8.5	Mobile machinery, industry	XX	RC	RC	RC	RC	RC	RC	RC
DEU	8.6	Other mobile sources	RE	RC	RC	RC	RC	RC	RC	RC
DEU	9.1	Landfills	RE	XX	XX	XX	XX	XX	XX	XX
DEU	9.2	Controlled waste incineration	XX	XX	XX	XX	XX	XX	XX	XX
DEU	9.3	Other waste treatment	RE	XX	XX	RC	RC	RC	RC	RC
DEU	10.1	Livestock, Cattle	RE	XX	RC	XX	RC	RC	RC	XX
DEU	10.2	Livestock, Poultry	RE	XX	RC	XX	RC	RC	RC	XX
DEU	10.3	Livestock, Sheep	RE	XX	RC	XX	RC	XX	XX	XX
DEU	10.4	Livestock, Goats	RE	XX	RC	XX	RC	XX	XX	XX
DEU	10.5	Livestock, Pigs	RE	XX	RC	XX	RC	RC	RC	XX
DEU	10.6	Livestock, Other animals	RE	XX	RC	XX	RC	RC	RC	XX
DEU	10.7	Crops and pastures	XX	XX	RC	XX	XX	XX	XX	XX
DEU	10.8	Agricultural waste burning	XX	XX	XX	XX	XX	XX	XX	XX
DEU	10.9	Rice cultivation	XX	XX	XX	XX	XX	XX	XX	XX
DEU	10.10	Storage and handling of agricultural products	XX	XX	XX	XX	XX	XX	XX	XX
DEU	10.11	Other agriculture	XX	XX	RC	XX	XX	RC	RC	XX
DNK	1.1	Power plants	RE	RC	RC	RC	RC	RC	RC	RC
DNK	1.2	Refineries	RE	RC	XX	RC	RC	RC	RC	RC
DNK	2.1	Residential combustion (including commercial/institutional)	RE	RC	RC	RC	RC	RC	RC	RC
DNK	2.2	Agricultural stationary combustion	RE	RC	RC	RC	RC	RC	RC	RC
DNK	34.1	Iron and steel industry (including coke ovens)	RE	RC	XX	RC	RC	RC	RC	RC
DNK	34.2	Non-ferrous metal industry	RE	XX	XX	XX	XX	RC	RC	XX
DNK	34.3	Chemical industry	RE	XX	RC	RC	RC	RC	RC	RC
DNK	34.4	Paper and pulp industry	RE	XX	XX	XX	XX	XX	XX	XX
DNK	34.5	Cement industry	XX	XX	XX	XX	XX	XX	XX	XX
DNK	34.6	Other non-metallic minerals industry	XX	RC	XX	RC	XX	XX	XX	XX
DNK	34.7	Storage and handling in industry	XX	XX	XX	XX	XX	XX	XX	XX
DNK	34.8	Other industries	RE	RC	RC	RC	RC	RC	RC	RC
DNK	5.1	Coal production	XX	XX	XX	XX	XX	RC	RC	XX
DNK	5.2	Oil production	RE	XX	XX	RC	XX	XX	XX	XX
DNK	5.3	Gas production	RE	XX	XX	RC	XX	XX	XX	XX
DNK	5.4	Gasoline distribution	XX	XX	XX	RC	XX	XX	XX	XX
DNK	5.5	Flaring	XX	RC	XX	RC	RC	RC	RC	RC
DNK	6.1	Solvent and other product use	XX	RC	XX	RC	XX	RC	RC	RC
DNK	7.1	Road transport, light duty vehicles	RE	RC	RC	RC	RC	RC	RC	RC
DNK	7.2	Road transport, heavy duty vehicles	RE	RC	RC	RC	RC	RC	RC	RC
DNK	7.3	Road transport, mopeds and motorcycles	RE	RC	RC	RC	RC	RC	RC	RC
DNK	7.4	Road transport, gasoline evaporation	XX	XX	XX	RC	XX	XX	XX	XX
DNK	7.5	Road transport, wear	XX	XX	XX	XX	XX	RC	RC	XX
DNK	8.1	Air transport (<1000m)	RE	RC	RC	RC	RC	RC	RC	RC
DNK	8.2	Rail transport	RE	RC	RC	RC	RC	RC	RC	RC
DNK	8.3	Navigation, non-international	T	T	T	T	T	T	T	T
DNK	8.4	Mobile machinery, agriculture	XX	RC	RC	RC	RC	RC	RC	RC
DNK	8.5	Mobile machinery, industry	XX	RC	RC	RC	RC	RC	RC	RC
DNK	8.6	Other mobile sources	RE	RC	RC	RC	RC	RC	RC	RC
DNK	9.1	Landfills	RE	XX	XX	XX	XX	XX	XX	XX
DNK	9.2	Controlled waste incineration	RE	XX	XX	XX	XX	XX	XX	XX
DNK	9.3	Other waste treatment	RE	RC	RC	RC	RC	RC	RC	RC
DNK	10.1	Livestock, Cattle	RE	XX	RC	XX	XX	RC	RC	XX
DNK	10.2	Livestock, Poultry	RE	XX	RC	XX	XX	RC	RC	XX
DNK	10.3	Livestock, Sheep	RE	XX	RC	XX	XX	RC	RC	XX
DNK	10.4	Livestock, Goats	RE	XX	RC	XX	XX	RC	RC	XX
DNK	10.5	Livestock, Pigs	RE	XX	RC	XX	XX	RC	RC	XX
DNK	10.6	Livestock, Other animals	RE	XX	RC	XX	XX	RC	RC	XX
DNK	10.7	Crops and pastures	XX	XX	RC	XX	XX	XX	XX	XX
DNK	10.8	Agricultural waste burning	RE	RC	RC	RC	RC	RC	RC	RC
DNK	10.9	Rice cultivation	XX	XX	XX	XX	XX	XX	XX	XX
DNK	10.10	Storage and handling of agricultural products	XX	XX	XX	XX	XX	XX	XX	XX
DNK	10.11	Other agriculture	XX	XX	RC	RC	XX	XX	XX	XX
ESP	1.1	Power plants	RE	RC	RC	RC	RC	RC	RC	RC
ESP	1.2	Refineries	RE	RC	XX	RC	RC	RC	RC	RC
ESP	2.1	Residential combustion (including commercial/institutional)	RE	RC	XX	RC	RC	RC	RC	RC
ESP	2.2	Agricultural stationary combustion	RE	RC	XX	RC	RC	RC	RC	RC
ESP	34.1	Iron and steel industry (including coke ovens)	RE	RC	RC	RC	RC	RC	RC	RC
ESP	34.2	Non-ferrous metal industry	RE	RC	XX	RC	RC	RC	RC	RC
ESP	34.3	Chemical industry	RE	RC	RC	RC	RC	RC	RC	RC
ESP	34.4	Paper and pulp industry	RE	RC	XX	RC	RC	RC	RC	RC
ESP	34.5	Cement industry	XX	XX	XX	XX	XX	XX	XX	XX
ESP	34.6	Other non-metallic minerals industry	XX	RC	XX	RC	XX	XX	XX	XX
ESP	34.7	Storage and handling in industry	XX	XX	XX	XX	XX	XX	XX	XX
ESP	34.8	Other industries	RE	RC	RC	RC	RC	RC	RC	RC
ESP	5.1	Coal production	RE	XX	XX	XX	XX	RC	RC	XX
ESP	5.2	Oil production	RE	XX	XX	RC	XX	XX	XX	XX
ESP	5.3	Gas production	RE	RC	XX	RC	RC	RC	RC	RC
ESP	5.4	Gasoline distribution	XX	XX	XX	RC	XX	XX	XX	XX
ESP	5.5	Flaring	XX	RC	XX	RC	RC	RC	RC	RC
ESP	6.1	Solvent and other product use	XX	XX	XX	RC	XX	XX	XX	XX
ESP	7.1	Road transport, light duty vehicles	RE	RC	RC	RC	RC	RC	RC	RC
ESP	7.2	Road transport, heavy duty vehicles	RE	RC	RC	RC	RC	RC	RC	RC
ESP	7.3	Road transport, mopeds and motorcycles	RE	RC	RC	RC	RC	RC	RC	RC
ESP	7.4	Road transport, gasoline evaporation	XX	XX	XX	RC	XX	XX	XX	XX
ESP	7.5	Road transport, wear	XX	XX	XX	XX	XX	RC	RC	XX
ESP	8.1	Air transport (<1000m)	RE	RC	XX	RC	RC	RC	RC	RC
ESP	8.2	Rail transport	RE	RC	RC	RC	RC	RC	RC	RC
ESP	8.3	Navigation, non-international	T	T	T	T	T	T	T	T
ESP	8.4	Mobile machinery, agriculture	XX	RC	RC	RC	RC	RC	RC	RC
ESP	8.5	Mobile machinery, industry	XX	RC	RC	RC	RC	RC	RC	RC
ESP	8.6	Other mobile sources	XX	XX	XX	XX	XX	XX	XX	XX
ESP	9.1	Landfills	RE	RC	XX	RC	RC	RC	RC	RC
ESP	9.2	Controlled waste incineration	RE	RC	XX	RC	RC	RC	RC	RC
ESP	9.3	Other waste treatment	RE	RC	RC	RC	RC	RC	RC	RC
ESP	10.1	Livestock, Cattle	RE	XX	RC	XX	XX	RC	RC	XX
ESP	10.2	Livestock, Poultry	RE	XX	RC	XX	XX	RC	RC	XX
ESP	10.3	Livestock, Sheep	RE	XX	RC	XX	XX	XX	XX	XX
ESP	10.4	Livestock, Goats	RE	XX	XX	XX	XX	XX	XX	XX
ESP	10.5	Livestock, Pigs	RE	XX	RC	XX	XX	RC	RC	XX
ESP	10.6	Livestock, Other animals	RE	XX	RC	XX	XX	RC	RC	XX
ESP	10.7	Crops and pastures	XX	XX	RC	XX	XX	RC	RC	XX
ESP	10.8	Agricultural waste burning	RE	RC	RC	RC	RC	RC	RC	RC
ESP	10.9	Rice cultivation	RE	XX	XX	XX	XX	XX	XX	XX
ESP	10.10	Storage and handling of agricultural products	XX	XX	XX	XX	XX	XX	XX	XX
ESP	10.11	Other agriculture	XX	XX	XX	XX	XX	XX	XX	XX
FIN	1.1	Power plants	RE	RC	RC	RC	RC	RC	RC	RC
FIN	1.2	Refineries	RE	RC	XX	RC	RC	RC	RC	RC
FIN	2.1	Residential combustion (including commercial/institutional)	RE	RC	RC	RC	RC	RC	RC	RC
FIN	2.2	Agricultural stationary combustion	RE	RC	RC	RC	RC	RC	RC	RC
FIN	34.1	Iron and steel industry (including coke ovens)	RE	RC	RC	RC	RC	RC	RC	RC
FIN	34.2	Non-ferrous metal industry	RE	RC	RC	RC	RC	RC	RC	RC
FIN	34.3	Chemical industry	RE	RC	RC	RC	RC	RC	RC	RC
FIN	34.4	Paper and pulp industry	RE	RC	RC	RC	RC	RC	RC	RC
FIN	34.5	Cement industry	XX	XX	XX	RC	RC	RC	RC	RC
FIN	34.6	Other non-metallic minerals industry	XX	RC	XX	RC	RC	RC	RC	RC
FIN	34.7	Storage and handling in industry	XX	RC	RC	RC	RC	RC	RC	RC
FIN	34.8	Other industries	RE	RC	RC	RC	RC	RC	RC	RC
FIN	5.1	Coal production	XX	XX	XX	XX	XX	RC	RC	XX
FIN	5.2	Oil production	XX	XX	XX	RC	XX	XX	XX	XX
FIN	5.3	Gas production	RE	RC	RC	RC	RC	RC	RC	RC
FIN	5.4	Gasoline distribution	XX	XX	XX	RC	RC	RC	RC	RC
FIN	5.5	Flaring	XX	XX	XX	XX	XX	XX	XX	XX
FIN	6.1	Solvent and other product use	XX	RC	RC	RC	RC	RC	RC	RC
FIN	7.1	Road transport, light duty vehicles	RE	RC	RC	RC	RC	RC	RC	RC
FIN	7.2	Road transport, heavy duty vehicles	RE	RC	RC	RC	RC	RC	RC	RC
FIN	7.3	Road transport, mopeds and motorcycles	RE	RC	RC	RC	RC	RC	RC	RC
FIN	7.4	Road transport, gasoline evaporation	XX	XX	XX	RC	XX	XX	XX	XX
FIN	7.5	Road transport, wear	XX	XX	XX	XX	XX	RC	RC	XX
FIN	8.1	Air transport (<1000m)	RE	RC	XX	RC	RC	RC	RC	RC
FIN	8.2	Rail transport	RE	RC	RC	RC	RC	RC	RC	RC
FIN	8.3	Navigation, non-international	T	T	T	T	T	T	T	T
FIN	8.4	Mobile machinery, agriculture	XX	RC	RC	RC	RC	RC	RC	RC
FIN	8.5	Mobile machinery, industry	XX	RC	RC	RC	RC	RC	RC	RC
FIN	8.6	Other mobile sources	RE	RC	RC	RC	RC	RC	RC	RC
FIN	9.1	Landfills	RE	RC	XX	RC	XX	RC	RC	XX
FIN	9.2	Controlled waste incineration	XX	RC	XX	RC	RC	RC	RC	RC
FIN	9.3	Other waste treatment	RE	RC	RC	RC	RC	RC	RC	RC
FIN	10.1	Livestock, Cattle	RE	XX	RC	XX	XX	RC	RC	XX
FIN	10.2	Livestock, Poultry	RE	XX	RC	XX	XX	RC	RC	XX
FIN	10.3	Livestock, Sheep	RE	XX	RC	XX	XX	XX	XX	XX
FIN	10.4	Livestock, Goats	RE	XX	RC	XX	XX	XX	XX	XX
FIN	10.5	Livestock, Pigs	RE	XX	RC	XX	XX	RC	RC	XX
FIN	10.6	Livestock, Other animals	RE	XX	RC	XX	XX	RC	RC	XX
FIN	10.7	Crops and pastures	XX	XX	RC	XX	XX	RC	RC	XX
FIN	10.8	Agricultural waste burning	RE	RC	XX	RC	XX	XX	XX	XX
FIN	10.9	Rice cultivation	XX	XX	XX	XX	XX	XX	XX	XX
FIN	10.10	Storage and handling of agricultural products	XX	XX	XX	XX	XX	XX	XX	XX
FIN	10.11	Other agriculture	XX	XX	XX	XX	XX	RC	RC	XX
FRA	1.1	Power plants	RE	RC	RC	RC	RC	RC	RC	RC
FRA	1.2	Refineries	RE	RC	XX	RC	RC	RC	RC	RC
FRA	2.1	Residential combustion (including commercial/institutional)	RE	RC	XX	RC	RC	RC	RC	RC
FRA	2.2	Agricultural stationary combustion	RE	RC	XX	RC	RC	RC	RC	RC
FRA	34.1	Iron and steel industry (including coke ovens)	RE	RC	XX	RC	RC	RC	RC	RC
FRA	34.2	Non-ferrous metal industry	RE	RC	XX	RC	RC	RC	RC	RC
FRA	34.3	Chemical industry	RE	RC	RC	RC	RC	RC	RC	RC
FRA	34.4	Paper and pulp industry	RE	RC	XX	RC	RC	RC	RC	RC
FRA	34.5	Cement industry	XX	XX	XX	XX	XX	XX	XX	XX
FRA	34.6	Other non-metallic minerals industry	XX	RC	RC	RC	XX	RC	RC	XX
FRA	34.7	Storage and handling in industry	XX	XX	XX	XX	XX	XX	XX	XX
FRA	34.8	Other industries	RE	RC	RC	RC	RC	RC	RC	RC
FRA	5.1	Coal production	RE	XX	XX	XX	XX	RC	RC	XX
FRA	5.2	Oil production	RE	XX	XX	RC	XX	XX	XX	XX
FRA	5.3	Gas production	RE	RC	XX	RC	RC	RC	RC	RC
FRA	5.4	Gasoline distribution	XX	XX	XX	RC	XX	XX	XX	XX
FRA	5.5	Flaring	XX	RC	XX	RC	RC	RC	RC	RC
FRA	6.1	Solvent and other product use	XX	RC	XX	RC	RC	RC	RC	XX
FRA	7.1	Road transport, light duty vehicles	RE	RC	RC	RC	RC	RC	RC	RC
FRA	7.2	Road transport, heavy duty vehicles	RE	RC	RC	RC	RC	RC	RC	RC
FRA	7.3	Road transport, mopeds and motorcycles	RE	RC	RC	RC	RC	RC	RC	RC
FRA	7.4	Road transport, gasoline evaporation	XX	XX	XX	RC	XX	XX	XX	XX
FRA	7.5	Road transport, wear	XX	XX	XX	XX	XX	RC	RC	XX
FRA	8.1	Air transport (<1000m)	RE	RC	XX	RC	RC	RC	RC	RC
FRA	8.2	Rail transport	RE	RC	XX	RC	RC	RC	RC	RC
FRA	8.3	Navigation, non-international	T	T	T	T	T	T	T	T
FRA	8.4	Mobile machinery, agriculture	XX	RC	XX	RC	RC	RC	RC	RC
FRA	8.5	Mobile machinery, industry	XX	RC	XX	RC	RC	RC	RC	RC
FRA	8.6	Other mobile sources	XX	RC	XX	RC	RC	RC	RC	RC
FRA	9.1	Landfills	RE	XX	XX	RC	XX	XX	XX	XX
FRA	9.2	Controlled waste incineration	RE	RC	RC	RC	RC	RC	RC	RC
FRA	9.3	Other waste treatment	RE	RC	RC	RC	RC	RC	RC	RC
FRA	10.1	Livestock, Cattle	RE	XX	RC	XX	XX	RC	RC	XX
FRA	10.2	Livestock, Poultry	RE	XX	RC	XX	XX	RC	RC	XX
FRA	10.3	Livestock, Sheep	RE	XX	RC	XX	XX	RC	RC	XX
FRA	10.4	Livestock, Goats	RE	XX	RC	XX	XX	RC	RC	XX
FRA	10.5	Livestock, Pigs	RE	XX	RC	XX	XX	RC	RC	XX
FRA	10.6	Livestock, Other animals	RE	XX	RC	XX	XX	RC	RC	XX
FRA	10.7	Crops and pastures	XX	XX	RC	XX	XX	XX	XX	XX
FRA	10.8	Agricultural waste burning	XX	XX	XX	XX	XX	XX	XX	XX
FRA	10.9	Rice cultivation	RE	XX	XX	XX	XX	XX	XX	XX
FRA	10.10	Storage and handling of agricultural products	XX	XX	XX	XX	XX	XX	XX	XX
FRA	10.11	Other agriculture	XX	XX	XX	XX	XX	RC	RC	XX
GBR	1.1	Power plants	RE	RC	RC	RC	RC	RC	RC	RC
GBR	1.2	Refineries	RE	RC	RC	RC	RC	RC	RC	RC
GBR	2.1	Residential combustion (including commercial/institutional)	RE	RC	RC	RC	RC	RC	RC	RC
GBR	2.2	Agricultural stationary combustion	RE	RC	RC	RC	RC	RC	RC	RC
GBR	34.1	Iron and steel industry (including coke ovens)	RE	RC	RC	RC	RC	RC	RC	RC
GBR	34.2	Non-ferrous metal industry	XX	RC	RC	XX	RC	RC	RC	RC
GBR	34.3	Chemical industry	RE	RC	RC	RC	RC	RC	RC	RC
GBR	34.4	Paper and pulp industry	XX	XX	RC	XX	XX	XX	XX	XX
GBR	34.5	Cement industry	XX	XX	XX	XX	XX	RC	RC	XX
GBR	34.6	Other non-metallic minerals industry	XX	RC	XX	RC	XX	RC	RC	XX
GBR	34.7	Storage and handling in industry	XX	RC	RC	RC	XX	RC	RC	RC
GBR	34.8	Other industries	RE	RC	RC	RC	RC	RC	RC	RC
GBR	5.1	Coal production	RE	XX	XX	XX	XX	XX	XX	XX
GBR	5.2	Oil production	RE	RC	XX	RC	RC	XX	XX	RC
GBR	5.3	Gas production	RE	XX	XX	RC	XX	XX	XX	XX
GBR	5.4	Gasoline distribution	XX	XX	XX	RC	XX	XX	XX	XX
GBR	5.5	Flaring	XX	RC	XX	RC	RC	RC	RC	RC
GBR	6.1	Solvent and other product use	XX	XX	RC	RC	XX	RC	RC	XX
GBR	7.1	Road transport, light duty vehicles	RE	RC	RC	RC	RC	RC	RC	RC
GBR	7.2	Road transport, heavy duty vehicles	RE	RC	RC	RC	RC	RC	RC	RC
GBR	7.3	Road transport, mopeds and motorcycles	RE	RC	RC	RC	RC	RC	RC	RC
GBR	7.4	Road transport, gasoline evaporation	XX	XX	XX	RC	XX	XX	XX	XX
GBR	7.5	Road transport, wear	XX	XX	XX	XX	XX	RC	RC	XX
GBR	8.1	Air transport (<1000m)	RE	RC	XX	RC	RC	RC	RC	RC
GBR	8.2	Rail transport	RE	RC	XX	RC	RC	RC	RC	RC
GBR	8.3	Navigation, non-international	T	T	T	T	T	T	T	T
GBR	8.4	Mobile machinery, agriculture	XX	RC	RC	RC	RC	RC	RC	RC
GBR	8.5	Mobile machinery, industry	XX	RC	RC	RC	RC	RC	RC	RC
GBR	8.6	Other mobile sources	RE	RC	RC	RC	RC	RC	RC	RC
GBR	9.1	Landfills	RE	XX	RC	RC	XX	XX	XX	XX
GBR	9.2	Controlled waste incineration	RE	RC	RC	RC	RC	RC	RC	RC
GBR	9.3	Other waste treatment	RE	RC	RC	RC	RC	RC	RC	RC
GBR	10.1	Livestock, Cattle	RE	XX	RC	XX	XX	RC	RC	XX
GBR	10.2	Livestock, Poultry	RE	XX	RC	XX	XX	RC	RC	XX
GBR	10.3	Livestock, Sheep	RE	XX	RC	XX	XX	XX	XX	XX
GBR	10.4	Livestock, Goats	RE	XX	XX	XX	XX	XX	XX	XX
GBR	10.5	Livestock, Pigs	RE	XX	RC	XX	XX	RC	RC	XX
GBR	10.6	Livestock, Other animals	RE	XX	RC	XX	XX	XX	XX	XX
GBR	10.7	Crops and pastures	XX	XX	RC	XX	XX	XX	XX	XX
GBR	10.8	Agricultural waste burning	XX	RC	XX	XX	XX	XX	XX	XX
GBR	10.9	Rice cultivation	XX	XX	XX	XX	XX	XX	XX	XX
GBR	10.10	Storage and handling of agricultural products	XX	XX	XX	XX	XX	XX	XX	XX
GBR	10.11	Other agriculture	XX	XX	XX	XX	XX	RC	RC	XX
GRC	1.1	Power plants	RE	RE	XX	RE	RE	G	G	RE
GRC	1.2	Refineries	RE	RE	XX	RE	RE	G	G	RE
GRC	2.1	Residential combustion (including commercial/institutional)	RE	RE	XX	RE	RE	G	G	RE
GRC	2.2	Agricultural stationary combustion	RE	RE	XX	RE	RE	XX	XX	RE
GRC	34.1	Iron and steel industry (including coke ovens)	RE	RE	XX	RE	RE	G	G	RE
GRC	34.2	Non-ferrous metal industry	RE	RE	XX	RE	RE	G	G	RE
GRC	34.3	Chemical industry	RE	RE	XX	RE	RE	G	G	RE
GRC	34.4	Paper and pulp industry	RE	RE	XX	RE	RE	G	G	RE
GRC	34.5	Cement industry	XX	XX	XX	XX	G	G	G	RE
GRC	34.6	Other non-metallic minerals industry	XX	RE	XX	RE	G	G	G	RE
GRC	34.7	Storage and handling in industry	XX	XX	XX	XX	XX	G	G	XX
GRC	34.8	Other industries	RE	RE	XX	RE	RE	G	G	RE
GRC	5.1	Coal production	RE	XX	XX	XX	XX	G	G	XX
GRC	5.2	Oil production	RE	RE	XX	RE	RE	XX	XX	RE
GRC	5.3	Gas production	RE	RE	XX	RE	RE	XX	XX	XX
GRC	5.4	Gasoline distribution	XX	XX	XX	G	XX	XX	XX	XX
GRC	5.5	Flaring	XX	G	XX	XX	G	G	G	G
GRC	6.1	Solvent and other product use	XX	XX	XX	RE	XX	XX	XX	XX
GRC	7.1	Road transport, light duty vehicles	RE	RE	RE	RE	RE	G	G	RE
GRC	7.2	Road transport, heavy duty vehicles	RE	G	XX	G	G	G	G	G
GRC	7.3	Road transport, mopeds and motorcycles	RE	G	XX	G	G	G	G	G
GRC	7.4	Road transport, gasoline evaporation	XX	XX	XX	G	XX	XX	XX	XX
GRC	7.5	Road transport, wear	XX	XX	XX	XX	XX	G	G	XX
GRC	8.1	Air transport (<1000m)	RE	RE	XX	RE	RE	G	G	RE
GRC	8.2	Rail transport	RE	RE	XX	RE	RE	G	G	RE
GRC	8.3	Navigation, non-international	T	T	T	T	T	T	T	T
GRC	8.4	Mobile machinery, agriculture	XX	RE	XX	RE	RE	G	G	RE
GRC	8.5	Mobile machinery, industry	XX	G	XX	G	G	G	G	G
GRC	8.6	Other mobile sources	XX	G	XX	G	G	G	G	G
GRC	9.1	Landfills	RE	XX	XX	XX	XX	XX	XX	XX
GRC	9.2	Controlled waste incineration	RE	XX	XX	XX	XX	XX	XX	XX
GRC	9.3	Other waste treatment	RE	G	XX	G	G	G	G	G
GRC	10.1	Livestock, Cattle	RE	XX	RE	XX	XX	G	G	XX
GRC	10.2	Livestock, Poultry	RE	XX	RE	XX	XX	G	G	XX
GRC	10.3	Livestock, Sheep	RE	XX	RE	XX	XX	XX	XX	XX
GRC	10.4	Livestock, Goats	RE	XX	RE	XX	XX	XX	XX	XX
GRC	10.5	Livestock, Pigs	RE	XX	RE	XX	XX	G	G	XX
GRC	10.6	Livestock, Other animals	RE	XX	RE	XX	XX	XX	XX	XX
GRC	10.7	Crops and pastures	XX	XX	RE	XX	XX	XX	XX	XX
GRC	10.8	Agricultural waste burning	RE	RE	RE	RE	RE	G	G	G
GRC	10.9	Rice cultivation	RE	XX	XX	XX	XX	XX	XX	XX
GRC	10.10	Storage and handling of agricultural products	XX	XX	XX	XX	XX	G	G	XX
GRC	10.11	Other agriculture	XX	XX	XX	XX	XX	G	G	XX
IRL	1.1	Power plants	RE	RC	XX	RC	RC	RC	RC	RC
IRL	1.2	Refineries	RE	RC	XX	RC	RC	RC	RC	RC
IRL	2.1	Residential combustion (including commercial/institutional)	RE	RC	RC	RC	RC	RC	RC	RC
IRL	2.2	Agricultural stationary combustion	RE	RC	XX	RC	RC	RC	RC	RC
IRL	34.1	Iron and steel industry (including coke ovens)	RE	RC	XX	RC	RC	RC	RC	RC
IRL	34.2	Non-ferrous metal industry	RE	RC	XX	RC	RC	RC	RC	RC
IRL	34.3	Chemical industry	RE	RC	XX	RC	RC	RC	RC	RC
IRL	34.4	Paper and pulp industry	RE	RC	XX	RC	RC	RC	RC	RC
IRL	34.5	Cement industry	XX	XX	XX	XX	XX	XX	XX	XX
IRL	34.6	Other non-metallic minerals industry	XX	XX	XX	XX	XX	XX	XX	XX
IRL	34.7	Storage and handling in industry	XX	XX	XX	XX	XX	RC	RC	XX
IRL	34.8	Other industries	RE	RC	XX	RC	RC	RC	RC	RC
IRL	5.1	Coal production	XX	XX	XX	XX	XX	XX	XX	XX
IRL	5.2	Oil production	XX	XX	XX	XX	XX	XX	XX	XX
IRL	5.3	Gas production	RE	RC	XX	XX	RC	RC	RC	RC
IRL	5.4	Gasoline distribution	XX	XX	XX	RC	XX	XX	XX	XX
IRL	5.5	Flaring	XX	XX	XX	XX	XX	XX	XX	XX
IRL	6.1	Solvent and other product use	XX	XX	XX	RC	XX	XX	XX	XX
IRL	7.1	Road transport, light duty vehicles	RE	RC	RC	RC	RC	RC	RC	RC
IRL	7.2	Road transport, heavy duty vehicles	RE	RC	RC	RC	RC	RC	RC	RC
IRL	7.3	Road transport, mopeds and motorcycles	RE	RC	RC	RC	RC	RC	RC	RC
IRL	7.4	Road transport, gasoline evaporation	XX	XX	XX	RC	XX	XX	XX	XX
IRL	7.5	Road transport, wear	XX	XX	XX	XX	XX	RC	RC	XX
IRL	8.1	Air transport (<1000m)	RE	RC	XX	RC	RC	RC	RC	RC
IRL	8.2	Rail transport	RE	RC	XX	RC	RC	RC	RC	RC
IRL	8.3	Navigation, non-international	T	T	T	T	T	T	T	T
IRL	8.4	Mobile machinery, agriculture	XX	RC	XX	RC	RC	RC	RC	RC
IRL	8.5	Mobile machinery, industry	XX	XX	XX	XX	XX	XX	XX	XX
IRL	8.6	Other mobile sources	XX	XX	XX	XX	XX	XX	XX	XX
IRL	9.1	Landfills	RE	XX	XX	RC	XX	XX	XX	XX
IRL	9.2	Controlled waste incineration	XX	RC	XX	RC	RC	RC	RC	RC
IRL	9.3	Other waste treatment	RE	RC	XX	RC	RC	RC	RC	RC
IRL	10.1	Livestock, Cattle	RE	XX	RC	XX	XX	XX	XX	XX
IRL	10.2	Livestock, Poultry	RE	XX	RC	XX	XX	XX	XX	XX
IRL	10.3	Livestock, Sheep	RE	XX	RC	XX	XX	XX	XX	XX
IRL	10.4	Livestock, Goats	RE	XX	RC	XX	XX	XX	XX	XX
IRL	10.5	Livestock, Pigs	RE	XX	RC	XX	XX	XX	XX	XX
IRL	10.6	Livestock, Other animals	RE	XX	RC	XX	XX	XX	XX	XX
IRL	10.7	Crops and pastures	XX	XX	RC	XX	XX	XX	XX	XX
IRL	10.8	Agricultural waste burning	XX	XX	XX	XX	XX	XX	XX	XX
IRL	10.9	Rice cultivation	XX	XX	XX	XX	XX	XX	XX	XX
IRL	10.10	Storage and handling of agricultural products	XX	XX	XX	XX	XX	RC	RC	XX
IRL	10.11	Other agriculture	XX	XX	XX	XX	XX	XX	XX	XX
ITA	1.1	Power plants	RE	RC	RC	RC	RC	RC	RC	RC
ITA	1.2	Refineries	RE	RC	XX	RC	RC	RC	RC	RC
ITA	2.1	Residential combustion (including commercial/institutional)	RE	RC	RC	RC	RC	RC	RC	RC
ITA	2.2	Agricultural stationary combustion	RE	RC	RC	RC	RC	RC	RC	RC
ITA	34.1	Iron and steel industry (including coke ovens)	RE	RC	XX	RC	RC	RC	RC	RC
ITA	34.2	Non-ferrous metal industry	RE	RC	XX	RC	RC	RC	RC	RC
ITA	34.3	Chemical industry	RE	RC	RC	RC	RC	RC	RC	RC
ITA	34.4	Paper and pulp industry	RE	XX	XX	RC	RC	RC	RC	RC
ITA	34.5	Cement industry	XX	XX	XX	XX	XX	RC	RC	RC
ITA	34.6	Other non-metallic minerals industry	XX	RC	RC	RC	XX	RC	RC	XX
ITA	34.7	Storage and handling in industry	XX	XX	XX	XX	XX	XX	XX	XX
ITA	34.8	Other industries	RE	RC	RC	RC	RC	RC	RC	RC
ITA	5.1	Coal production	RE	XX	XX	RC	XX	RC	RC	XX
ITA	5.2	Oil production	RE	XX	XX	RC	XX	XX	XX	XX
ITA	5.3	Gas production	RE	RC	XX	RC	RC	RC	RC	RC
ITA	5.4	Gasoline distribution	XX	XX	XX	RC	XX	XX	XX	XX
ITA	5.5	Flaring	XX	XX	XX	RC	RC	XX	XX	RC
ITA	6.1	Solvent and other product use	XX	XX	XX	RC	XX	RC	RC	XX
ITA	7.1	Road transport, light duty vehicles	RE	RC	RC	RC	RC	RC	RC	RC
ITA	7.2	Road transport, heavy duty vehicles	RE	RC	RC	RC	RC	RC	RC	RC
ITA	7.3	Road transport, mopeds and motorcycles	RE	RC	RC	RC	RC	RC	RC	RC
ITA	7.4	Road transport, gasoline evaporation	XX	XX	XX	RC	XX	XX	XX	XX
ITA	7.5	Road transport, wear	XX	XX	XX	XX	XX	RC	RC	XX
ITA	8.1	Air transport (<1000m)	RE	RC	XX	RC	RC	RC	RC	RC
ITA	8.2	Rail transport	RE	RC	RC	RC	RC	RC	RC	RC
ITA	8.3	Navigation, non-international	T	T	T	T	T	T	T	T
ITA	8.4	Mobile machinery, agriculture	XX	RC	RC	RC	RC	RC	RC	RC
ITA	8.5	Mobile machinery, industry	XX	RC	RC	RC	RC	RC	RC	RC
ITA	8.6	Other mobile sources	RE	RC	RC	RC	RC	RC	RC	RC
ITA	9.1	Landfills	RE	XX	RC	RC	XX	XX	XX	XX
ITA	9.2	Controlled waste incineration	RE	RC	XX	RC	RC	RC	RC	RC
ITA	9.3	Other waste treatment	RE	RC	RC	RC	RC	RC	RC	RC
ITA	10.1	Livestock, Cattle	RE	XX	RC	XX	XX	RC	RC	XX
ITA	10.2	Livestock, Poultry	RE	XX	RC	XX	XX	RC	RC	XX
ITA	10.3	Livestock, Sheep	RE	XX	RC	XX	XX	XX	XX	XX
ITA	10.4	Livestock, Goats	RE	XX	RC	XX	XX	XX	XX	XX
ITA	10.5	Livestock, Pigs	RE	XX	RC	XX	XX	RC	RC	XX
ITA	10.6	Livestock, Other animals	RE	XX	RC	XX	XX	RC	RC	XX
ITA	10.7	Crops and pastures	XX	XX	RC	XX	XX	XX	XX	XX
ITA	10.8	Agricultural waste burning	RE	RC	RC	RC	RC	RC	RC	RC
ITA	10.9	Rice cultivation	RE	XX	XX	XX	XX	XX	XX	XX
ITA	10.10	Storage and handling of agricultural products	XX	XX	XX	XX	XX	XX	XX	XX
ITA	10.11	Other agriculture	XX	XX	XX	XX	XX	XX	XX	XX
LUX	1.1	Power plants	RE	G	XX	G	G	G	G	G
LUX	1.2	Refineries	XX	XX	XX	XX	XX	XX	XX	XX
LUX	2.1	Residential combustion (including commercial/institutional)	RE	G	RE	G	G	G	G	G
LUX	2.2	Agricultural stationary combustion	RE	XX	XX	XX	XX	XX	XX	XX
LUX	34.1	Iron and steel industry (including coke ovens)	RE	G	XX	XX	XX	G	G	XX
LUX	34.2	Non-ferrous metal industry	RE	XX	XX	XX	XX	XX	XX	XX
LUX	34.3	Chemical industry	RE	G	XX	G	G	XX	XX	XX
LUX	34.4	Paper and pulp industry	RE	XX	XX	XX	XX	XX	XX	XX
LUX	34.5	Cement industry	XX	XX	XX	XX	G	G	G	G
LUX	34.6	Other non-metallic minerals industry	XX	G	XX	XX	XX	XX	XX	XX
LUX	34.7	Storage and handling in industry	XX	XX	XX	XX	XX	G	G	XX
LUX	34.8	Other industries	RE	G	RE	G	G	G	G	G
LUX	5.1	Coal production	XX	XX	XX	XX	XX	XX	XX	XX
LUX	5.2	Oil production	XX	XX	XX	G	XX	XX	XX	XX
LUX	5.3	Gas production	RE	XX	XX	G	XX	XX	XX	XX
LUX	5.4	Gasoline distribution	XX	XX	XX	G	XX	XX	XX	XX
LUX	5.5	Flaring	XX	XX	XX	XX	XX	XX	XX	XX
LUX	6.1	Solvent and other product use	XX	XX	XX	G	XX	XX	XX	XX
LUX	7.1	Road transport, light duty vehicles	RE	G	RE	G	G	G	G	G
LUX	7.2	Road transport, heavy duty vehicles	RE	G	RE	G	G	G	G	G
LUX	7.3	Road transport, mopeds and motorcycles	RE	G	RE	G	G	G	G	XX
LUX	7.4	Road transport, gasoline evaporation	XX	XX	XX	G	XX	XX	XX	XX
LUX	7.5	Road transport, wear	XX	XX	XX	XX	XX	G	G	XX
LUX	8.1	Air transport (<1000m)	RE	XX	XX	G	G	G	G	G
LUX	8.2	Rail transport	RE	G	RE	G	G	G	G	G
LUX	8.3	Navigation, non-international	T	T	T	T	T	T	T	T
LUX	8.4	Mobile machinery, agriculture	XX	G	XX	G	G	G	G	G
LUX	8.5	Mobile machinery, industry	XX	G	RE	G	G	G	G	G
LUX	8.6	Other mobile sources	RE	XX	XX	G	XX	XX	XX	XX
LUX	9.1	Landfills	RE	XX	XX	XX	XX	XX	XX	XX
LUX	9.2	Controlled waste incineration	XX	XX	XX	XX	XX	XX	XX	XX
LUX	9.3	Other waste treatment	RE	XX	RE	G	G	G	G	G
LUX	10.1	Livestock, Cattle	RE	XX	RE	XX	XX	G	G	XX
LUX	10.2	Livestock, Poultry	RE	XX	RE	XX	XX	G	G	XX
LUX	10.3	Livestock, Sheep	RE	XX	RE	XX	XX	XX	XX	XX
LUX	10.4	Livestock, Goats	RE	XX	RE	XX	XX	XX	XX	XX
LUX	10.5	Livestock, Pigs	RE	XX	RE	XX	XX	G	G	XX
LUX	10.6	Livestock, Other animals	RE	XX	RE	XX	XX	XX	XX	XX
LUX	10.7	Crops and pastures	XX	XX	RE	XX	XX	XX	XX	XX
LUX	10.8	Agricultural waste burning	XX	XX	XX	XX	XX	XX	XX	XX
LUX	10.9	Rice cultivation	XX	XX	XX	XX	XX	XX	XX	XX
LUX	10.10	Storage and handling of agricultural products	XX	XX	XX	XX	XX	G	G	XX
LUX	10.11	Other agriculture	XX	XX	XX	XX	XX	XX	XX	XX
NLD	1.1	Power plants	RE	RC	RC	RC	RC	RC	RC	RC
NLD	1.2	Refineries	RE	RC	RC	RC	RC	RC	RC	RC
NLD	2.1	Residential combustion (including commercial/institutional)	RE	RC	RC	RC	RC	RC	RC	RC
NLD	2.2	Agricultural stationary combustion	RE	RC	RC	RC	RC	RC	RC	RC
NLD	34.1	Iron and steel industry (including coke ovens)	RE	RC	RC	RC	RC	RC	RC	RC
NLD	34.2	Non-ferrous metal industry	RE	RC	RC	RC	RC	RC	RC	RC
NLD	34.3	Chemical industry	RE	RC	RC	RC	RC	RC	RC	RC
NLD	34.4	Paper and pulp industry	RE	RC	RC	RC	RC	RC	RC	RC
NLD	34.5	Cement industry	XX	RC	XX	XX	RC	RC	RC	RC
NLD	34.6	Other non-metallic minerals industry	XX	XX	XX	XX	XX	XX	XX	XX
NLD	34.7	Storage and handling in industry	XX	RC	RC	RC	RC	RC	RC	RC
NLD	34.8	Other industries	RE	RC	RC	RC	RC	RC	RC	RC
NLD	5.1	Coal production	RE	XX	XX	XX	XX	XX	XX	XX
NLD	5.2	Oil production	RE	XX	XX	RC	XX	XX	XX	XX
NLD	5.3	Gas production	RE	XX	XX	RC	XX	XX	XX	XX
NLD	5.4	Gasoline distribution	XX	XX	XX	XX	XX	XX	XX	XX
NLD	5.5	Flaring	XX	XX	XX	XX	XX	XX	XX	XX
NLD	6.1	Solvent and other product use	XX	RC	RC	RC	XX	RC	RC	XX
NLD	7.1	Road transport, light duty vehicles	RE	RC	RC	RC	RC	RC	RC	RC
NLD	7.2	Road transport, heavy duty vehicles	RE	RC	RC	RC	RC	RC	RC	RC
NLD	7.3	Road transport, mopeds and motorcycles	RE	RC	RC	RC	RC	RC	RC	RC
NLD	7.4	Road transport, gasoline evaporation	XX	XX	XX	RC	XX	XX	XX	XX
NLD	7.5	Road transport, wear	XX	XX	XX	XX	XX	RC	RC	XX
NLD	8.1	Air transport (<1000m)	RE	RC	RC	RC	RC	RC	RC	RC
NLD	8.2	Rail transport	RE	RC	RC	RC	RC	RC	RC	RC
NLD	8.3	Navigation, non-international	T	T	T	T	T	T	T	T
NLD	8.4	Mobile machinery, agriculture	XX	RC	RC	RC	RC	RC	RC	RC
NLD	8.5	Mobile machinery, industry	XX	RC	RC	RC	RC	RC	RC	RC
NLD	8.6	Other mobile sources	RE	RC	RC	RC	RC	RC	RC	RC
NLD	9.1	Landfills	RE	XX	XX	RC	XX	XX	XX	XX
NLD	9.2	Controlled waste incineration	XX	RC	RC	RC	RC	RC	RC	RC
NLD	9.3	Other waste treatment	RE	RC	RC	RC	RC	RC	RC	RC
NLD	10.1	Livestock, Cattle	RE	XX	RC	XX	RC	RC	RC	XX
NLD	10.2	Livestock, Poultry	RE	XX	RC	XX	XX	RC	RC	XX
NLD	10.3	Livestock, Sheep	RE	XX	RC	XX	XX	XX	XX	XX
NLD	10.4	Livestock, Goats	RE	XX	XX	XX	XX	RC	RC	XX
NLD	10.5	Livestock, Pigs	RE	XX	RC	XX	XX	RC	RC	XX
NLD	10.6	Livestock, Other animals	RE	XX	RC	XX	XX	RC	RC	XX
NLD	10.7	Crops and pastures	XX	XX	RC	XX	XX	XX	XX	XX
NLD	10.8	Agricultural waste burning	XX	XX	XX	XX	XX	XX	XX	XX
NLD	10.9	Rice cultivation	XX	XX	XX	XX	XX	XX	XX	XX
NLD	10.10	Storage and handling of agricultural products	XX	XX	XX	XX	XX	XX	XX	XX
NLD	10.11	Other agriculture	XX	XX	XX	RC	XX	RC	RC	XX
NOR	1.1	Power plants	RE	RC	XX	RC	RC	RC	RC	RC
NOR	1.2	Refineries	RE	RC	XX	RC	RC	RC	RC	RC
NOR	2.1	Residential combustion (including commercial/institutional)	RE	RC	RC	RC	RC	RC	RC	RC
NOR	2.2	Agricultural stationary combustion	RE	RC	XX	RC	RC	RC	RC	RC
NOR	34.1	Iron and steel industry (including coke ovens)	RE	RC	XX	RC	RC	RC	RC	RC
NOR	34.2	Non-ferrous metal industry	RE	RC	RC	RC	RC	RC	RC	RC
NOR	34.3	Chemical industry	RE	RC	RC	RC	RC	RC	RC	RC
NOR	34.4	Paper and pulp industry	RE	RC	XX	RC	RC	RC	RC	RC
NOR	34.5	Cement industry	XX	XX	XX	XX	XX	RC	RC	RC
NOR	34.6	Other non-metallic minerals industry	XX	XX	XX	XX	XX	RC	RC	RC
NOR	34.7	Storage and handling in industry	XX	XX	RC	XX	RC	RC	RC	RC
NOR	34.8	Other industries	RE	RC	XX	RC	RC	RC	RC	RC
NOR	5.1	Coal production	RE	XX	XX	XX	XX	XX	XX	XX
NOR	5.2	Oil production	RE	XX	XX	RC	XX	XX	XX	RC
NOR	5.3	Gas production	RE	XX	XX	RC	XX	XX	XX	XX
NOR	5.4	Gasoline distribution	XX	XX	XX	RC	XX	XX	XX	XX
NOR	5.5	Flaring	XX	RC	XX	RC	RC	RC	RC	RC
NOR	6.1	Solvent and other product use	XX	RC	XX	RC	RC	RC	RC	XX
NOR	7.1	Road transport, light duty vehicles	RE	RC	RC	RC	RC	RC	RC	RC
NOR	7.2	Road transport, heavy duty vehicles	RE	RC	RC	RC	RC	RC	RC	RC
NOR	7.3	Road transport, mopeds and motorcycles	RE	RC	RC	RC	RC	XX	XX	RC
NOR	7.4	Road transport, gasoline evaporation	XX	XX	XX	RC	XX	XX	XX	XX
NOR	7.5	Road transport, wear	XX	XX	XX	XX	XX	RC	RC	XX
NOR	8.1	Air transport (<1000m)	RE	RC	XX	RC	RC	RC	RC	RC
NOR	8.2	Rail transport	RE	RC	XX	RC	RC	RC	RC	RC
NOR	8.3	Navigation, non-international	T	T	T	T	T	T	T	T
NOR	8.4	Mobile machinery, agriculture	XX	RC	RC	RC	RC	RC	RC	RC
NOR	8.5	Mobile machinery, industry	XX	RC	RC	RC	RC	RC	RC	RC
NOR	8.6	Other mobile sources	RE	RC	RC	RC	RC	RC	RC	RC
NOR	9.1	Landfills	RE	XX	XX	XX	XX	XX	XX	XX
NOR	9.2	Controlled waste incineration	RE	RC	XX	RC	RC	RC	RC	RC
NOR	9.3	Other waste treatment	RE	RC	RC	RC	RC	RC	RC	RC
NOR	10.1	Livestock, Cattle	RE	XX	RC	XX	XX	XX	XX	XX
NOR	10.2	Livestock, Poultry	RE	XX	RC	XX	XX	XX	XX	XX
NOR	10.3	Livestock, Sheep	RE	XX	RC	XX	XX	XX	XX	XX
NOR	10.4	Livestock, Goats	RE	XX	RC	XX	XX	XX	XX	XX
NOR	10.5	Livestock, Pigs	RE	XX	RC	XX	XX	XX	XX	XX
NOR	10.6	Livestock, Other animals	RE	XX	RC	XX	XX	XX	XX	XX
NOR	10.7	Crops and pastures	XX	XX	RC	XX	XX	XX	XX	XX
NOR	10.8	Agricultural waste burning	RE	RC	RC	RC	RC	RC	RC	RC
NOR	10.9	Rice cultivation	XX	XX	XX	XX	XX	XX	XX	XX
NOR	10.10	Storage and handling of agricultural products	XX	XX	XX	XX	XX	XX	XX	XX
NOR	10.11	Other agriculture	XX	XX	RC	XX	XX	RC	RC	XX
PRT	1.1	Power plants	RE	RC	RC	RC	RC	RC	RC	RC
PRT	1.2	Refineries	RE	RC	XX	RC	RC	RC	RC	RC
PRT	2.1	Residential combustion (including commercial/institutional)	RE	RC	XX	RC	RC	RC	RC	RC
PRT	2.2	Agricultural stationary combustion	RE	RC	XX	RC	RC	RC	RC	RC
PRT	34.1	Iron and steel industry (including coke ovens)	RE	RC	RC	RC	RC	RC	RC	RC
PRT	34.2	Non-ferrous metal industry	XX	XX	XX	XX	XX	XX	XX	XX
PRT	34.3	Chemical industry	RE	RC	RC	RC	RC	RC	RC	RC
PRT	34.4	Paper and pulp industry	RE	RC	XX	RC	RC	RC	RC	RC
PRT	34.5	Cement industry	XX	XX	XX	XX	XX	XX	XX	XX
PRT	34.6	Other non-metallic minerals industry	XX	RC	XX	RC	RC	RC	RC	RC
PRT	34.7	Storage and handling in industry	XX	XX	XX	XX	RC	XX	XX	RC
PRT	34.8	Other industries	RE	RC	RC	RC	RC	RC	RC	RC
PRT	5.1	Coal production	XX	XX	XX	XX	XX	XX	XX	XX
PRT	5.2	Oil production	XX	XX	XX	RC	XX	XX	XX	XX
PRT	5.3	Gas production	RE	XX	XX	XX	XX	XX	XX	XX
PRT	5.4	Gasoline distribution	XX	XX	XX	RC	XX	XX	XX	XX
PRT	5.5	Flaring	XX	RC	XX	RC	RC	XX	XX	RC
PRT	6.1	Solvent and other product use	XX	XX	XX	RC	XX	RC	RC	XX
PRT	7.1	Road transport, light duty vehicles	RE	RC	RC	RC	RC	RC	RC	RC
PRT	7.2	Road transport, heavy duty vehicles	RE	RC	RC	RC	RC	RC	RC	RC
PRT	7.3	Road transport, mopeds and motorcycles	RE	RC	RC	RC	RC	RC	RC	RC
PRT	7.4	Road transport, gasoline evaporation	XX	XX	XX	XX	XX	XX	XX	XX
PRT	7.5	Road transport, wear	XX	XX	XX	XX	XX	XX	XX	XX
PRT	8.1	Air transport (<1000m)	RE	RC	XX	RC	RC	RC	RC	RC
PRT	8.2	Rail transport	RE	RC	RC	RC	RC	RC	RC	RC
PRT	8.3	Navigation, non-international	T	T	T	T	T	T	T	T
PRT	8.4	Mobile machinery, agriculture	XX	RC	RC	RC	RC	RC	RC	RC
PRT	8.5	Mobile machinery, industry	XX	XX	XX	XX	XX	XX	XX	XX
PRT	8.6	Other mobile sources	RE	RC	XX	RC	RC	RC	RC	RC
PRT	9.1	Landfills	RE	XX	RC	RC	XX	XX	XX	XX
PRT	9.2	Controlled waste incineration	RE	RC	RC	RC	RC	RC	RC	RC
PRT	9.3	Other waste treatment	RE	RC	RC	RC	RC	XX	XX	RC
PRT	10.1	Livestock, Cattle	RE	XX	RC	XX	XX	XX	XX	XX
PRT	10.2	Livestock, Poultry	RE	XX	RC	XX	XX	XX	XX	XX
PRT	10.3	Livestock, Sheep	RE	XX	RC	XX	XX	XX	XX	XX
PRT	10.4	Livestock, Goats	RE	XX	RC	XX	XX	XX	XX	XX
PRT	10.5	Livestock, Pigs	RE	XX	RC	XX	XX	XX	XX	XX
PRT	10.6	Livestock, Other animals	RE	XX	RC	XX	XX	XX	XX	XX
PRT	10.7	Crops and pastures	XX	XX	RC	XX	XX	XX	XX	XX
PRT	10.8	Agricultural waste burning	RE	RC	RC	RC	RC	RC	RC	RC
PRT	10.9	Rice cultivation	RE	XX	XX	XX	XX	XX	XX	XX
PRT	10.10	Storage and handling of agricultural products	XX	XX	XX	XX	XX	XX	XX	XX
PRT	10.11	Other agriculture	XX	XX	XX	XX	XX	XX	XX	XX
SWE	1.1	Power plants	RE	RC	RC	RC	RC	RC	RC	RC
SWE	1.2	Refineries	RE	RC	RC	RC	RC	RC	RC	RC
SWE	2.1	Residential combustion (including commercial/institutional)	RE	RC	RC	RC	RC	RC	RC	RC
SWE	2.2	Agricultural stationary combustion	RE	RC	RC	RC	RC	RC	RC	RC
SWE	34.1	Iron and steel industry (including coke ovens)	RE	RC	RC	RC	RC	RC	RC	RC
SWE	34.2	Non-ferrous metal industry	RE	RC	RC	RC	RC	RC	RC	RC
SWE	34.3	Chemical industry	RE	RC	RC	RC	RC	RC	RC	RC
SWE	34.4	Paper and pulp industry	RE	RC	RC	RC	RC	RC	RC	RC
SWE	34.5	Cement industry	XX	XX	XX	XX	RC	RC	RC	RC
SWE	34.6	Other non-metallic minerals industry	XX	XX	XX	RC	RC	RC	RC	RC
SWE	34.7	Storage and handling in industry	XX	XX	RC	RC	RC	RC	RC	RC
SWE	34.8	Other industries	RE	RC	RC	RC	RC	RC	RC	RC
SWE	5.1	Coal production	RE	RC	XX	RC	RC	RC	RC	RC
SWE	5.2	Oil production	XX	RC	RC	RC	RC	RC	RC	RC
SWE	5.3	Gas production	RE	RC	RC	RC	RC	RC	RC	RC
SWE	5.4	Gasoline distribution	XX	RC	RC	RC	RC	RC	RC	XX
SWE	5.5	Flaring	XX	RC	RC	RC	RC	RC	RC	RC
SWE	6.1	Solvent and other product use	XX	XX	XX	RC	XX	RC	RC	XX
SWE	7.1	Road transport, light duty vehicles	RE	RC	RC	RC	RC	RC	RC	RC
SWE	7.2	Road transport, heavy duty vehicles	RE	RC	RC	RC	RC	RC	RC	RC
SWE	7.3	Road transport, mopeds and motorcycles	RE	RC	RC	RC	RC	RC	RC	RC
SWE	7.4	Road transport, gasoline evaporation	XX	XX	XX	XX	XX	XX	XX	XX
SWE	7.5	Road transport, wear	XX	XX	XX	XX	XX	RC	RC	XX
SWE	8.1	Air transport (<1000m)	RE	RC	XX	RC	RC	RC	RC	RC
SWE	8.2	Rail transport	RE	RC	RC	RC	RC	RC	RC	RC
SWE	8.3	Navigation, non-international	T	T	T	T	T	T	T	T
SWE	8.4	Mobile machinery, agriculture	XX	RC	RC	RC	RC	RC	RC	RC
SWE	8.5	Mobile machinery, industry	XX	RC	RC	RC	RC	RC	RC	RC
SWE	8.6	Other mobile sources	RE	RC	RC	RC	RC	RC	RC	RC
SWE	9.1	Landfills	RE	XX	XX	XX	XX	XX	XX	XX
SWE	9.2	Controlled waste incineration	RE	RC	XX	RC	RC	RC	RC	RC
SWE	9.3	Other waste treatment	RE	XX	RC	XX	XX	RC	RC	XX
SWE	10.1	Livestock, Cattle	RE	XX	RC	XX	XX	RC	RC	XX
SWE	10.2	Livestock, Poultry	RE	XX	RC	XX	XX	RC	RC	XX
SWE	10.3	Livestock, Sheep	RE	XX	RC	XX	XX	XX	XX	XX
SWE	10.4	Livestock, Goats	RE	XX	XX	XX	XX	XX	XX	XX
SWE	10.5	Livestock, Pigs	RE	XX	RC	XX	XX	RC	RC	XX
SWE	10.6	Livestock, Other animals	RE	XX	RC	XX	XX	RC	RC	XX
SWE	10.7	Crops and pastures	XX	XX	RC	XX	XX	XX	XX	XX
SWE	10.8	Agricultural waste burning	XX	XX	XX	XX	XX	XX	XX	XX
SWE	10.9	Rice cultivation	XX	XX	XX	XX	XX	XX	XX	XX
SWE	10.10	Storage and handling of agricultural products	XX	XX	XX	XX	XX	XX	XX	XX
SWE	10.11	Other agriculture	XX	XX	XX	XX	XX	RC	RC	XX
BGR	1.1	Power plants	RE	RE	G	G	RE	G	G	RE
BGR	1.2	Refineries	RE	RE	G	G	RE	G	G	RE
BGR	2.1	Residential combustion (including commercial/institutional)	RE	RE	G	G	RE	G	G	RE
BGR	2.2	Agricultural stationary combustion	RE	RE	XX	XX	RE	XX	XX	RE
BGR	34.1	Iron and steel industry (including coke ovens)	RE	RE	XX	XX	RE	G	G	RE
BGR	34.2	Non-ferrous metal industry	RE	RE	XX	XX	RE	G	G	RE
BGR	34.3	Chemical industry	RE	RE	G	G	RE	G	G	RE
BGR	34.4	Paper and pulp industry	RE	RE	G	G	RE	G	G	RE
BGR	34.5	Cement industry	XX	XX	XX	XX	XX	G	G	RE
BGR	34.6	Other non-metallic minerals industry	XX	RE	XX	XX	RE	G	G	RE
BGR	34.7	Storage and handling in industry	XX	XX	XX	XX	XX	G	G	XX
BGR	34.8	Other industries	RE	RE	G	G	RE	G	G	RE
BGR	5.1	Coal production	RE	XX	XX	XX	XX	G	G	XX
BGR	5.2	Oil production	RE	XX	XX	G	XX	XX	XX	XX
BGR	5.3	Gas production	RE	RE	XX	G	RE	XX	XX	RE
BGR	5.4	Gasoline distribution	XX	XX	XX	G	XX	XX	XX	XX
BGR	5.5	Flaring	XX	RE	XX	XX	RE	G	G	RE
BGR	6.1	Solvent and other product use	XX	XX	XX	G	XX	XX	XX	XX
BGR	7.1	Road transport, light duty vehicles	RE	RE	G	G	RE	G	G	RE
BGR	7.2	Road transport, heavy duty vehicles	RE	XX	G	G	XX	G	G	XX
BGR	7.3	Road transport, mopeds and motorcycles	RE	XX	G	G	XX	G	G	XX
BGR	7.4	Road transport, gasoline evaporation	XX	XX	XX	G	XX	XX	XX	XX
BGR	7.5	Road transport, wear	XX	XX	XX	XX	XX	G	G	XX
BGR	8.1	Air transport (<1000m)	RE	RE	XX	G	RE	G	G	RE
BGR	8.2	Rail transport	RE	RE	XX	G	RE	G	G	XX
BGR	8.3	Navigation, non-international	T	T	T	T	T	T	T	T
BGR	8.4	Mobile machinery, agriculture	XX	RE	G	G	RE	G	G	RE
BGR	8.5	Mobile machinery, industry	XX	XX	XX	G	XX	G	G	XX
BGR	8.6	Other mobile sources	XX	XX	XX	G	XX	G	G	XX
BGR	9.1	Landfills	RE	XX	XX	XX	XX	XX	XX	XX
BGR	9.2	Controlled waste incineration	XX	RE	XX	XX	RE	XX	XX	RE
BGR	9.3	Other waste treatment	RE	XX	G	G	XX	G	G	XX
BGR	10.1	Livestock, Cattle	RE	XX	G	XX	XX	G	G	XX
BGR	10.2	Livestock, Poultry	RE	XX	G	XX	XX	G	G	XX
BGR	10.3	Livestock, Sheep	RE	XX	XX	XX	XX	XX	XX	XX
BGR	10.4	Livestock, Goats	RE	XX	XX	XX	XX	XX	XX	XX
BGR	10.5	Livestock, Pigs	RE	XX	G	XX	XX	G	G	XX
BGR	10.6	Livestock, Other animals	RE	XX	G	XX	XX	XX	XX	XX
BGR	10.7	Crops and pastures	XX	XX	XX	XX	XX	XX	XX	XX
BGR	10.8	Agricultural waste burning	RE	RE	G	G	RE	G	G	XX
BGR	10.9	Rice cultivation	RE	XX	XX	XX	XX	XX	XX	XX
BGR	10.10	Storage and handling of agricultural products	XX	XX	XX	XX	XX	G	G	XX
BGR	10.11	Other agriculture	XX	XX	G	XX	XX	G	G	XX
CYP	1.1	Power plants	RE	RC	XX	RC	RC	RC	RC	RC
CYP	1.2	Refineries	XX	XX	XX	RC	RC	RC	RC	RC
CYP	2.1	Residential combustion (including commercial/institutional)	RE	RC	RC	RC	RC	RC	RC	RC
CYP	2.2	Agricultural stationary combustion	RE	RC	XX	RC	RC	RC	RC	RC
CYP	34.1	Iron and steel industry (including coke ovens)	XX	RC	XX	RC	RC	RC	RC	RC
CYP	34.2	Non-ferrous metal industry	XX	RC	XX	RC	RC	RC	RC	RC
CYP	34.3	Chemical industry	XX	RC	XX	RC	RC	RC	RC	RC
CYP	34.4	Paper and pulp industry	XX	RC	XX	RC	RC	RC	RC	RC
CYP	34.5	Cement industry	XX	XX	XX	XX	XX	RC	RC	XX
CYP	34.6	Other non-metallic minerals industry	XX	RC	XX	RC	XX	RC	RC	XX
CYP	34.7	Storage and handling in industry	XX	XX	XX	XX	XX	XX	XX	XX
CYP	34.8	Other industries	RE	RC	XX	RC	RC	RC	RC	RC
CYP	5.1	Coal production	XX	XX	XX	XX	XX	XX	XX	XX
CYP	5.2	Oil production	XX	XX	XX	XX	XX	XX	XX	XX
CYP	5.3	Gas production	XX	XX	XX	XX	XX	XX	XX	XX
CYP	5.4	Gasoline distribution	XX	XX	XX	RC	XX	XX	XX	XX
CYP	5.5	Flaring	XX	RC	XX	RC	RC	XX	XX	RC
CYP	6.1	Solvent and other product use	XX	XX	XX	RC	XX	XX	XX	XX
CYP	7.1	Road transport, light duty vehicles	RE	RC	RC	RC	RC	RC	RC	RC
CYP	7.2	Road transport, heavy duty vehicles	RE	RC	RC	RC	RC	RC	RC	RC
CYP	7.3	Road transport, mopeds and motorcycles	RE	RC	RC	RC	RC	RC	RC	XX
CYP	7.4	Road transport, gasoline evaporation	XX	XX	XX	RC	XX	XX	XX	XX
CYP	7.5	Road transport, wear	XX	XX	XX	XX	XX	RC	RC	XX
CYP	8.1	Air transport (<1000m)	XX	RC	XX	RC	RC	RC	RC	RC
CYP	8.2	Rail transport	XX	XX	XX	XX	XX	XX	XX	XX
CYP	8.3	Navigation, non-international	T	T	T	T	T	T	T	T
CYP	8.4	Mobile machinery, agriculture	XX	RC	RC	RC	RC	RC	RC	RC
CYP	8.5	Mobile machinery, industry	XX	RC	RC	RC	RC	RC	RC	RC
CYP	8.6	Other mobile sources	RE	XX	XX	XX	XX	XX	XX	XX
CYP	9.1	Landfills	RE	XX	XX	RC	XX	XX	XX	XX
CYP	9.2	Controlled waste incineration	XX	RC	XX	RC	RC	XX	XX	RC
CYP	9.3	Other waste treatment	RE	XX	RC	RC	XX	RC	RC	XX
CYP	10.1	Livestock, Cattle	RE	XX	RC	XX	RC	RC	RC	XX
CYP	10.2	Livestock, Poultry	RE	XX	RC	XX	RC	RC	RC	XX
CYP	10.3	Livestock, Sheep	RE	XX	RC	XX	RC	XX	XX	XX
CYP	10.4	Livestock, Goats	RE	XX	RC	XX	RC	XX	XX	XX
CYP	10.5	Livestock, Pigs	RE	XX	RC	XX	RC	RC	RC	XX
CYP	10.6	Livestock, Other animals	XX	XX	RC	XX	RC	RC	RC	XX
CYP	10.7	Crops and pastures	XX	XX	RC	XX	XX	RC	RC	XX
CYP	10.8	Agricultural waste burning	XX	XX	XX	XX	XX	XX	XX	XX
CYP	10.9	Rice cultivation	XX	XX	XX	XX	XX	XX	XX	XX
CYP	10.10	Storage and handling of agricultural products	XX	XX	XX	XX	XX	XX	XX	XX
CYP	10.11	Other agriculture	XX	XX	XX	XX	XX	XX	XX	XX
CZE	1.1	Power plants	RE	G	G	G	G	G	G	RE
CZE	1.2	Refineries	RE	G	G	G	G	G	G	RE
CZE	2.1	Residential combustion (including commercial/institutional)	RE	G	G	G	G	G	G	RE
CZE	2.2	Agricultural stationary combustion	RE	XX	XX	XX	XX	XX	XX	RE
CZE	34.1	Iron and steel industry (including coke ovens)	RE	G	XX	XX	G	G	G	RE
CZE	34.2	Non-ferrous metal industry	RE	G	XX	XX	XX	G	G	RE
CZE	34.3	Chemical industry	RE	G	G	G	G	G	G	RE
CZE	34.4	Paper and pulp industry	RE	G	G	G	G	G	G	RE
CZE	34.5	Cement industry	XX	XX	XX	XX	G	G	G	RE
CZE	34.6	Other non-metallic minerals industry	XX	G	XX	XX	G	G	G	RE
CZE	34.7	Storage and handling in industry	XX	XX	XX	XX	XX	G	G	XX
CZE	34.8	Other industries	RE	G	G	G	G	G	G	RE
CZE	5.1	Coal production	RE	XX	XX	XX	XX	G	G	XX
CZE	5.2	Oil production	RE	XX	XX	G	XX	XX	XX	RE
CZE	5.3	Gas production	RE	XX	XX	G	XX	XX	XX	RE
CZE	5.4	Gasoline distribution	XX	XX	XX	G	XX	XX	XX	XX
CZE	5.5	Flaring	XX	G	XX	XX	G	G	G	RE
CZE	6.1	Solvent and other product use	XX	XX	XX	G	XX	XX	XX	XX
CZE	7.1	Road transport, light duty vehicles	RE	G	G	G	G	G	G	RE
CZE	7.2	Road transport, heavy duty vehicles	RE	G	G	G	G	G	G	RE
CZE	7.3	Road transport, mopeds and motorcycles	RE	G	G	G	G	G	G	RE
CZE	7.4	Road transport, gasoline evaporation	XX	XX	XX	G	XX	XX	XX	XX
CZE	7.5	Road transport, wear	XX	XX	XX	XX	XX	G	G	XX
CZE	8.1	Air transport (<1000m)	RE	G	XX	G	G	G	G	RE
CZE	8.2	Rail transport	RE	G	G	G	G	G	G	RE
CZE	8.3	Navigation, non-international	T	T	T	T	T	T	T	T
CZE	8.4	Mobile machinery, agriculture	XX	G	G	G	G	G	G	RE
CZE	8.5	Mobile machinery, industry	XX	G	G	G	G	G	G	RE
CZE	8.6	Other mobile sources	RE	G	G	G	G	G	G	RE
CZE	9.1	Landfills	RE	XX	XX	XX	XX	XX	XX	XX
CZE	9.2	Controlled waste incineration	RE	XX	XX	XX	XX	XX	XX	RE
CZE	9.3	Other waste treatment	RE	G	G	G	G	G	G	RE
CZE	10.1	Livestock, Cattle	RE	XX	G	XX	XX	G	G	XX
CZE	10.2	Livestock, Poultry	RE	XX	G	XX	XX	G	G	XX
CZE	10.3	Livestock, Sheep	RE	XX	XX	XX	XX	XX	XX	XX
CZE	10.4	Livestock, Goats	RE	XX	XX	XX	XX	XX	XX	XX
CZE	10.5	Livestock, Pigs	RE	XX	G	XX	XX	G	G	XX
CZE	10.6	Livestock, Other animals	RE	XX	G	XX	XX	XX	XX	XX
CZE	10.7	Crops and pastures	XX	XX	XX	XX	XX	XX	XX	XX
CZE	10.8	Agricultural waste burning	RE	G	XX	G	XX	XX	XX	XX
CZE	10.9	Rice cultivation	XX	XX	XX	XX	XX	XX	XX	XX
CZE	10.10	Storage and handling of agricultural products	XX	XX	XX	XX	XX	G	G	XX
CZE	10.11	Other agriculture	XX	XX	G	XX	XX	G	G	XX
EST	1.1	Power plants	RE	RC	XX	RC	RC	RC	RC	RC
EST	1.2	Refineries	XX	RC	XX	RC	RC	RC	RC	RC
EST	2.1	Residential combustion (including commercial/institutional)	RE	RC	RC	RC	RC	RC	RC	RC
EST	2.2	Agricultural stationary combustion	RE	RC	RC	RC	RC	RC	RC	RC
EST	34.1	Iron and steel industry (including coke ovens)	RE	RC	RC	RC	RC	RC	RC	RC
EST	34.2	Non-ferrous metal industry	RE	RC	RC	RC	RC	RC	RC	RC
EST	34.3	Chemical industry	RE	RC	RC	RC	RC	RC	RC	RC
EST	34.4	Paper and pulp industry	RE	RC	XX	RC	RC	RC	RC	RC
EST	34.5	Cement industry	XX	XX	XX	XX	XX	RC	RC	XX
EST	34.6	Other non-metallic minerals industry	XX	RC	XX	RC	RC	RC	RC	RC
EST	34.7	Storage and handling in industry	XX	RC	RC	RC	RC	RC	RC	RC
EST	34.8	Other industries	RE	RC	RC	RC	RC	RC	RC	RC
EST	5.1	Coal production	XX	RC	RC	RC	RC	RC	RC	RC
EST	5.2	Oil production	XX	XX	XX	XX	XX	XX	XX	XX
EST	5.3	Gas production	RE	XX	XX	RC	XX	XX	XX	XX
EST	5.4	Gasoline distribution	XX	XX	RC	RC	XX	XX	XX	XX
EST	5.5	Flaring	XX	RC	XX	RC	RC	XX	XX	RC
EST	6.1	Solvent and other product use	XX	RC	RC	RC	RC	RC	RC	RC
EST	7.1	Road transport, light duty vehicles	RE	RC	RC	RC	RC	RC	RC	RC
EST	7.2	Road transport, heavy duty vehicles	RE	RC	RC	RC	RC	RC	RC	RC
EST	7.3	Road transport, mopeds and motorcycles	RE	RC	RC	RC	RC	RC	RC	RC
EST	7.4	Road transport, gasoline evaporation	XX	XX	XX	RC	XX	XX	XX	XX
EST	7.5	Road transport, wear	XX	XX	XX	XX	XX	RC	RC	XX
EST	8.1	Air transport (<1000m)	RE	RC	XX	RC	RC	RC	RC	RC
EST	8.2	Rail transport	RE	RC	RC	RC	RC	RC	RC	RC
EST	8.3	Navigation, non-international	T	T	T	T	T	T	T	T
EST	8.4	Mobile machinery, agriculture	XX	RC	RC	RC	RC	RC	RC	RC
EST	8.5	Mobile machinery, industry	XX	RC	RC	RC	RC	RC	RC	RC
EST	8.6	Other mobile sources	RE	RC	RC	RC	RC	RC	RC	RC
EST	9.1	Landfills	RE	RC	RC	RC	XX	RC	RC	XX
EST	9.2	Controlled waste incineration	XX	RC	RC	RC	RC	XX	XX	RC
EST	9.3	Other waste treatment	RE	RC	RC	RC	RC	XX	XX	RC
EST	10.1	Livestock, Cattle	RE	XX	RC	XX	XX	RC	RC	XX
EST	10.2	Livestock, Poultry	RE	XX	RC	XX	XX	RC	RC	XX
EST	10.3	Livestock, Sheep	RE	XX	RC	XX	XX	XX	XX	XX
EST	10.4	Livestock, Goats	RE	XX	XX	XX	XX	XX	XX	XX
EST	10.5	Livestock, Pigs	RE	XX	RC	XX	XX	RC	RC	XX
EST	10.6	Livestock, Other animals	RE	XX	RC	XX	XX	RC	RC	XX
EST	10.7	Crops and pastures	XX	XX	RC	XX	XX	RC	RC	XX
EST	10.8	Agricultural waste burning	RE	RC	RC	RC	RC	RC	RC	RC
EST	10.9	Rice cultivation	XX	XX	XX	XX	XX	XX	XX	XX
EST	10.10	Storage and handling of agricultural products	XX	XX	XX	XX	XX	XX	XX	XX
EST	10.11	Other agriculture	XX	XX	XX	XX	XX	XX	XX	XX
HRV	1.1	Power plants	G	RC	RC	RC	RC	RC	RC	RC
HRV	1.2	Refineries	G	RC	RC	RC	RC	RC	RC	RC
HRV	2.1	Residential combustion (including commercial/institutional)	G	RC	RC	RC	RC	RC	RC	RC
HRV	2.2	Agricultural stationary combustion	XX	RC	RC	RC	RC	RC	RC	RC
HRV	34.1	Iron and steel industry (including coke ovens)	XX	RC	RC	RC	RC	RC	RC	RC
HRV	34.2	Non-ferrous metal industry	XX	XX	XX	XX	XX	XX	XX	XX
HRV	34.3	Chemical industry	G	RC	RC	RC	RC	RC	RC	RC
HRV	34.4	Paper and pulp industry	G	XX	XX	RC	RC	XX	XX	RC
HRV	34.5	Cement industry	XX	RC	RC	RC	RC	RC	RC	RC
HRV	34.6	Other non-metallic minerals industry	XX	RC	XX	RC	XX	RC	RC	XX
HRV	34.7	Storage and handling in industry	XX	XX	RC	RC	XX	RC	RC	XX
HRV	34.8	Other industries	G	RC	RC	RC	RC	RC	RC	RC
HRV	5.1	Coal production	G	XX	XX	RC	XX	RC	RC	XX
HRV	5.2	Oil production	G	XX	XX	RC	XX	XX	XX	XX
HRV	5.3	Gas production	G	XX	XX	RC	XX	XX	XX	XX
HRV	5.4	Gasoline distribution	XX	XX	XX	RC	XX	XX	XX	XX
HRV	5.5	Flaring	XX	RC	XX	RC	RC	XX	XX	RC
HRV	6.1	Solvent and other product use	XX	XX	XX	RC	XX	XX	XX	XX
HRV	7.1	Road transport, light duty vehicles	G	RC	RC	RC	RC	RC	RC	RC
HRV	7.2	Road transport, heavy duty vehicles	G	RC	RC	RC	RC	RC	RC	RC
HRV	7.3	Road transport, mopeds and motorcycles	G	RC	RC	RC	RC	RC	RC	RC
HRV	7.4	Road transport, gasoline evaporation	XX	XX	XX	RC	XX	XX	XX	XX
HRV	7.5	Road transport, wear	XX	XX	XX	XX	XX	RC	RC	XX
HRV	8.1	Air transport (<1000m)	XX	RC	RC	RC	RC	XX	XX	RC
HRV	8.2	Rail transport	G	RC	RC	RC	RC	XX	XX	RC
HRV	8.3	Navigation, non-international	T	T	T	T	T	T	T	T
HRV	8.4	Mobile machinery, agriculture	G	RC	RC	RC	RC	XX	XX	RC
HRV	8.5	Mobile machinery, industry	G	RC	RC	RC	RC	XX	XX	RC
HRV	8.6	Other mobile sources	G	RC	RC	RC	RC	XX	XX	RC
HRV	9.1	Landfills	G	XX	XX	RC	XX	XX	XX	XX
HRV	9.2	Controlled waste incineration	XX	RC	XX	RC	RC	RC	RC	RC
HRV	9.3	Other waste treatment	G	RC	RC	RC	RC	XX	XX	RC
HRV	10.1	Livestock, Cattle	G	XX	RC	XX	XX	RC	RC	XX
HRV	10.2	Livestock, Poultry	G	XX	RC	XX	XX	RC	RC	XX
HRV	10.3	Livestock, Sheep	XX	XX	RC	XX	XX	XX	XX	XX
HRV	10.4	Livestock, Goats	XX	XX	RC	XX	XX	XX	XX	XX
HRV	10.5	Livestock, Pigs	G	XX	RC	XX	XX	RC	RC	XX
HRV	10.6	Livestock, Other animals	G	XX	RC	XX	XX	RC	RC	XX
HRV	10.7	Crops and pastures	XX	XX	RC	XX	XX	XX	XX	XX
HRV	10.8	Agricultural waste burning	G	RC	RC	RC	RC	RC	RC	RC
HRV	10.9	Rice cultivation	XX	XX	XX	XX	XX	XX	XX	XX
HRV	10.10	Storage and handling of agricultural products	XX	XX	XX	XX	XX	XX	XX	XX
HRV	10.11	Other agriculture	XX	XX	XX	XX	XX	XX	XX	XX
HUN	1.1	Power plants	RE	G	RE	G	G	G	G	RE
HUN	1.2	Refineries	RE	G	G	G	G	G	G	RE
HUN	2.1	Residential combustion (including commercial/institutional)	RE	G	RE	G	G	G	G	RE
HUN	2.2	Agricultural stationary combustion	RE	XX	RE	XX	XX	XX	XX	RE
HUN	34.1	Iron and steel industry (including coke ovens)	RE	G	RE	XX	G	G	G	RE
HUN	34.2	Non-ferrous metal industry	XX	G	RE	XX	XX	G	G	RE
HUN	34.3	Chemical industry	RE	G	RE	G	G	G	G	RE
HUN	34.4	Paper and pulp industry	RE	G	XX	G	G	G	G	RE
HUN	34.5	Cement industry	XX	XX	XX	XX	G	G	G	RE
HUN	34.6	Other non-metallic minerals industry	XX	G	XX	XX	G	G	G	G
HUN	34.7	Storage and handling in industry	XX	XX	XX	XX	XX	G	G	XX
HUN	34.8	Other industries	RE	G	RE	G	G	G	G	RE
HUN	5.1	Coal production	RE	XX	RE	XX	XX	G	G	XX
HUN	5.2	Oil production	RE	XX	XX	G	XX	XX	XX	RE
HUN	5.3	Gas production	RE	XX	XX	G	XX	XX	XX	XX
HUN	5.4	Gasoline distribution	XX	XX	XX	G	XX	XX	XX	XX
HUN	5.5	Flaring	XX	G	XX	XX	G	G	G	G
HUN	6.1	Solvent and other product use	XX	XX	XX	G	XX	XX	XX	XX
HUN	7.1	Road transport, light duty vehicles	RE	G	RE	G	G	G	G	RE
HUN	7.2	Road transport, heavy duty vehicles	RE	G	RE	G	G	G	G	RE
HUN	7.3	Road transport, mopeds and motorcycles	RE	G	G	G	G	G	G	G
HUN	7.4	Road transport, gasoline evaporation	XX	XX	XX	G	XX	XX	XX	XX
HUN	7.5	Road transport, wear	XX	XX	XX	XX	XX	G	G	XX
HUN	8.1	Air transport (<1000m)	RE	G	XX	G	G	G	G	RE
HUN	8.2	Rail transport	RE	G	G	G	G	G	G	RE
HUN	8.3	Navigation, non-international	T	T	T	T	T	T	T	T
HUN	8.4	Mobile machinery, agriculture	XX	G	G	G	G	G	G	RE
HUN	8.5	Mobile machinery, industry	XX	G	XX	G	G	G	G	G
HUN	8.6	Other mobile sources	XX	G	XX	G	G	G	G	XX
HUN	9.1	Landfills	RE	XX	RE	XX	XX	XX	XX	XX
HUN	9.2	Controlled waste incineration	RE	XX	RE	XX	XX	XX	XX	RE
HUN	9.3	Other waste treatment	RE	G	RE	G	G	G	G	RE
HUN	10.1	Livestock, Cattle	RE	XX	RE	XX	XX	G	G	XX
HUN	10.2	Livestock, Poultry	RE	XX	RE	XX	XX	G	G	XX
HUN	10.3	Livestock, Sheep	RE	XX	RE	XX	XX	XX	XX	XX
HUN	10.4	Livestock, Goats	RE	XX	RE	XX	XX	XX	XX	XX
HUN	10.5	Livestock, Pigs	RE	XX	RE	XX	XX	G	G	XX
HUN	10.6	Livestock, Other animals	RE	XX	RE	XX	XX	XX	XX	XX
HUN	10.7	Crops and pastures	XX	XX	RE	XX	XX	XX	XX	XX
HUN	10.8	Agricultural waste burning	RE	G	RE	G	G	G	G	G
HUN	10.9	Rice cultivation	RE	XX	XX	XX	XX	XX	XX	XX
HUN	10.10	Storage and handling of agricultural products	XX	XX	XX	XX	XX	G	G	XX
HUN	10.11	Other agriculture	XX	XX	RE	XX	XX	G	G	XX
LTU	1.1	Power plants	RE	RE	G	G	RE	G	G	RE
LTU	1.2	Refineries	RE	RE	G	G	RE	G	G	RE
LTU	2.1	Residential combustion (including commercial/institutional)	RE	RE	G	G	RE	G	G	RE
LTU	2.2	Agricultural stationary combustion	RE	RE	XX	XX	RE	XX	XX	RE
LTU	34.1	Iron and steel industry (including coke ovens)	RE	RE	RE	XX	RE	XX	XX	RE
LTU	34.2	Non-ferrous metal industry	XX	XX	XX	XX	XX	XX	XX	XX
LTU	34.3	Chemical industry	RE	RE	RE	G	RE	G	G	RE
LTU	34.4	Paper and pulp industry	RE	RE	XX	G	RE	G	G	RE
LTU	34.5	Cement industry	XX	RE	XX	XX	RE	G	G	RE
LTU	34.6	Other non-metallic minerals industry	XX	G	XX	XX	G	G	G	G
LTU	34.7	Storage and handling in industry	XX	XX	XX	XX	XX	G	G	XX
LTU	34.8	Other industries	RE	RE	RE	G	RE	G	G	RE
LTU	5.1	Coal production	XX	XX	XX	XX	XX	G	XX	XX
LTU	5.2	Oil production	RE	RE	XX	G	RE	XX	XX	RE
LTU	5.3	Gas production	RE	RE	XX	G	RE	XX	XX	RE
LTU	5.4	Gasoline distribution	XX	XX	XX	G	XX	XX	XX	XX
LTU	5.5	Flaring	XX	G	XX	XX	G	G	G	G
LTU	6.1	Solvent and other product use	XX	XX	XX	G	XX	XX	XX	XX
LTU	7.1	Road transport, light duty vehicles	RE	RE	RE	G	RE	G	G	RE
LTU	7.2	Road transport, heavy duty vehicles	RE	RE	RE	G	RE	G	G	RE
LTU	7.3	Road transport, mopeds and motorcycles	RE	RE	RE	G	RE	G	G	RE
LTU	7.4	Road transport, gasoline evaporation	XX	XX	XX	G	XX	XX	XX	XX
LTU	7.5	Road transport, wear	XX	XX	XX	XX	XX	G	G	XX
LTU	8.1	Air transport (<1000m)	RE	RE	XX	G	RE	XX	XX	RE
LTU	8.2	Rail transport	RE	RE	RE	G	RE	G	G	RE
LTU	8.3	Navigation, non-international	T	T	T	T	T	T	T	T
LTU	8.4	Mobile machinery, agriculture	XX	RE	RE	G	RE	G	G	RE
LTU	8.5	Mobile machinery, industry	XX	RE	XX	G	RE	G	G	RE
LTU	8.6	Other mobile sources	RE	RE	XX	G	RE	G	G	RE
LTU	9.1	Landfills	RE	XX	XX	XX	XX	XX	XX	XX
LTU	9.2	Controlled waste incineration	XX	XX	XX	XX	XX	XX	XX	XX
LTU	9.3	Other waste treatment	RE	G	G	G	G	G	G	G
LTU	10.1	Livestock, Cattle	RE	XX	RE	XX	XX	G	G	XX
LTU	10.2	Livestock, Poultry	RE	XX	RE	XX	XX	G	G	XX
LTU	10.3	Livestock, Sheep	RE	XX	RE	XX	XX	XX	XX	XX
LTU	10.4	Livestock, Goats	RE	XX	RE	XX	XX	XX	XX	XX
LTU	10.5	Livestock, Pigs	RE	XX	RE	XX	XX	G	G	XX
LTU	10.6	Livestock, Other animals	RE	XX	RE	XX	XX	XX	XX	XX
LTU	10.7	Crops and pastures	XX	XX	RE	XX	XX	XX	XX	XX
LTU	10.8	Agricultural waste burning	RE	RE	RE	G	RE	G	G	G
LTU	10.9	Rice cultivation	XX	XX	XX	XX	XX	XX	XX	XX
LTU	10.10	Storage and handling of agricultural products	XX	XX	XX	XX	XX	G	G	XX
LTU	10.11	Other agriculture	XX	XX	G	XX	XX	G	G	XX
LVA	1.1	Power plants	RE	RC	XX	RC	RC	G	G	RC
LVA	1.2	Refineries	XX	XX	XX	XX	XX	G	G	XX
LVA	2.1	Residential combustion (including commercial/institutional)	RE	RC	RC	RC	RC	G	G	RC
LVA	2.2	Agricultural stationary combustion	RE	RC	XX	RC	RC	XX	XX	RC
LVA	34.1	Iron and steel industry (including coke ovens)	RE	RC	XX	RC	RC	G	G	RC
LVA	34.2	Non-ferrous metal industry	RE	RC	XX	RC	RC	XX	XX	RC
LVA	34.3	Chemical industry	RE	RC	XX	RC	RC	G	G	RC
LVA	34.4	Paper and pulp industry	RE	RC	XX	RC	RC	G	G	RC
LVA	34.5	Cement industry	XX	XX	XX	RC	RC	G	G	RC
LVA	34.6	Other non-metallic minerals industry	XX	RC	XX	RC	XX	G	G	XX
LVA	34.7	Storage and handling in industry	XX	XX	XX	RC	XX	G	G	XX
LVA	34.8	Other industries	RE	RC	XX	RC	RC	G	G	RC
LVA	5.1	Coal production	XX	XX	XX	XX	XX	G	XX	XX
LVA	5.2	Oil production	XX	XX	XX	XX	XX	XX	XX	XX
LVA	5.3	Gas production	XX	RC	XX	XX	RC	XX	XX	XX
LVA	5.4	Gasoline distribution	XX	XX	XX	RC	XX	XX	XX	XX
LVA	5.5	Flaring	XX	XX	XX	XX	XX	XX	XX	XX
LVA	6.1	Solvent and other product use	XX	XX	XX	RC	XX	XX	XX	XX
LVA	7.1	Road transport, light duty vehicles	RE	RC	RC	RC	RC	G	G	RC
LVA	7.2	Road transport, heavy duty vehicles	RE	RC	RC	RC	RC	G	G	RC
LVA	7.3	Road transport, mopeds and motorcycles	RE	RC	RC	RC	RC	G	G	RC
LVA	7.4	Road transport, gasoline evaporation	XX	XX	XX	XX	XX	XX	XX	XX
LVA	7.5	Road transport, wear	XX	XX	XX	XX	XX	G	G	XX
LVA	8.1	Air transport (<1000m)	RE	RC	XX	RC	RC	G	G	RC
LVA	8.2	Rail transport	RE	RC	RC	RC	RC	G	G	RC
LVA	8.3	Navigation, non-international	T	T	T	T	T	T	T	T
LVA	8.4	Mobile machinery, agriculture	XX	RC	XX	RC	RC	G	G	RC
LVA	8.5	Mobile machinery, industry	XX	RC	XX	RC	RC	G	G	RC
LVA	8.6	Other mobile sources	RE	RC	XX	RC	RC	G	G	RC
LVA	9.1	Landfills	RE	XX	XX	RC	XX	XX	XX	XX
LVA	9.2	Controlled waste incineration	XX	RC	XX	RC	RC	XX	XX	RC
LVA	9.3	Other waste treatment	RE	RC	RC	RC	RC	G	G	RC
LVA	10.1	Livestock, Cattle	RE	XX	RC	XX	XX	G	G	XX
LVA	10.2	Livestock, Poultry	RE	XX	RC	XX	XX	G	G	XX
LVA	10.3	Livestock, Sheep	RE	XX	RC	XX	XX	XX	XX	XX
LVA	10.4	Livestock, Goats	RE	XX	RC	XX	XX	XX	XX	XX
LVA	10.5	Livestock, Pigs	RE	XX	RC	XX	XX	G	G	XX
LVA	10.6	Livestock, Other animals	RE	XX	RC	XX	XX	XX	XX	XX
LVA	10.7	Crops and pastures	XX	XX	RC	XX	XX	XX	XX	XX
LVA	10.8	Agricultural waste burning	RE	RC	RC	RC	RC	G	G	RC
LVA	10.9	Rice cultivation	XX	XX	XX	XX	XX	XX	XX	XX
LVA	10.10	Storage and handling of agricultural products	XX	XX	XX	XX	XX	G	G	XX
LVA	10.11	Other agriculture	XX	RC	XX	XX	RC	G	G	XX
MLT	1.1	Power plants	RE	G	XX	RC	RE	RC	RC	RE
MLT	1.2	Refineries	XX	XX	XX	XX	XX	XX	XX	XX
MLT	2.1	Residential combustion (including commercial/institutional)	RE	G	XX	RC	RE	XX	XX	RE
MLT	2.2	Agricultural stationary combustion	RE	XX	XX	RC	XX	XX	XX	XX
MLT	34.1	Iron and steel industry (including coke ovens)	RE	XX	XX	XX	RE	XX	XX	RE
MLT	34.2	Non-ferrous metal industry	XX	XX	XX	XX	XX	XX	XX	XX
MLT	34.3	Chemical industry	XX	XX	XX	XX	XX	XX	XX	XX
MLT	34.4	Paper and pulp industry	XX	XX	XX	XX	XX	XX	XX	XX
MLT	34.5	Cement industry	XX	XX	XX	XX	XX	XX	XX	XX
MLT	34.6	Other non-metallic minerals industry	XX	XX	XX	RC	XX	XX	XX	XX
MLT	34.7	Storage and handling in industry	XX	XX	XX	RC	XX	XX	XX	XX
MLT	34.8	Other industries	XX	XX	XX	RC	XX	RC	RC	XX
MLT	5.1	Coal production	XX	XX	XX	XX	XX	XX	XX	XX
MLT	5.2	Oil production	XX	XX	XX	XX	XX	XX	XX	XX
MLT	5.3	Gas production	XX	XX	XX	XX	XX	XX	XX	XX
MLT	5.4	Gasoline distribution	XX	XX	XX	XX	XX	XX	XX	XX
MLT	5.5	Flaring	XX	XX	XX	XX	XX	XX	XX	XX
MLT	6.1	Solvent and other product use	XX	XX	XX	RC	XX	XX	XX	XX
MLT	7.1	Road transport, light duty vehicles	RE	G	RC	RC	RE	RC	RC	RE
MLT	7.2	Road transport, heavy duty vehicles	RE	G	RC	RC	XX	RC	RC	XX
MLT	7.3	Road transport, mopeds and motorcycles	RE	G	RC	RC	XX	RC	RC	XX
MLT	7.4	Road transport, gasoline evaporation	XX	XX	XX	XX	XX	XX	XX	XX
MLT	7.5	Road transport, wear	XX	XX	XX	XX	XX	XX	XX	XX
MLT	8.1	Air transport (<1000m)	RE	XX	XX	RC	RE	XX	XX	RE
MLT	8.2	Rail transport	XX	XX	XX	XX	XX	XX	XX	XX
MLT	8.3	Navigation, non-international	T	T	T	T	T	T	T	T
MLT	8.4	Mobile machinery, agriculture	XX	XX	XX	RC	RE	XX	XX	RE
MLT	8.5	Mobile machinery, industry	XX	XX	XX	XX	XX	XX	XX	XX
MLT	8.6	Other mobile sources	XX	XX	XX	XX	XX	XX	XX	XX
MLT	9.1	Landfills	RE	XX	RC	XX	XX	XX	XX	XX
MLT	9.2	Controlled waste incineration	RE	XX	XX	RC	RE	RC	RC	RE
MLT	9.3	Other waste treatment	RE	XX	RC	XX	XX	XX	XX	XX
MLT	10.1	Livestock, Cattle	RE	XX	RC	XX	XX	RC	RC	XX
MLT	10.2	Livestock, Poultry	RE	XX	RC	XX	XX	RC	RC	XX
MLT	10.3	Livestock, Sheep	RE	XX	RC	XX	XX	XX	XX	XX
MLT	10.4	Livestock, Goats	RE	XX	RC	XX	XX	XX	XX	XX
MLT	10.5	Livestock, Pigs	RE	XX	RC	XX	XX	RC	RC	XX
MLT	10.6	Livestock, Other animals	RE	XX	RC	XX	XX	XX	XX	XX
MLT	10.7	Crops and pastures	XX	XX	RC	XX	XX	XX	XX	XX
MLT	10.8	Agricultural waste burning	XX	XX	XX	XX	XX	XX	XX	XX
MLT	10.9	Rice cultivation	XX	XX	XX	XX	XX	XX	XX	XX
MLT	10.10	Storage and handling of agricultural products	XX	XX	XX	XX	XX	XX	XX	XX
MLT	10.11	Other agriculture	XX	XX	XX	XX	XX	XX	XX	XX
POL	1.1	Power plants	RE	G	RE	G	G	RE	RE	G
POL	1.2	Refineries	RE	G	XX	G	G	RE	RE	G
POL	2.1	Residential combustion (including commercial/institutional)	RE	G	RE	G	G	RE	RE	G
POL	2.2	Agricultural stationary combustion	RE	XX	XX	XX	XX	RE	RE	XX
POL	34.1	Iron and steel industry (including coke ovens)	RE	G	RE	XX	G	RE	RE	G
POL	34.2	Non-ferrous metal industry	RE	G	XX	XX	XX	RE	RE	G
POL	34.3	Chemical industry	RE	G	RE	G	G	RE	RE	G
POL	34.4	Paper and pulp industry	RE	G	XX	G	G	RE	RE	G
POL	34.5	Cement industry	XX	XX	XX	XX	G	RE	RE	G
POL	34.6	Other non-metallic minerals industry	XX	G	RE	XX	G	RE	RE	G
POL	34.7	Storage and handling in industry	XX	XX	XX	XX	XX	XX	XX	XX
POL	34.8	Other industries	RE	G	XX	G	G	RE	RE	G
POL	5.1	Coal production	RE	XX	XX	XX	XX	RE	RE	XX
POL	5.2	Oil production	RE	XX	XX	G	XX	XX	XX	XX
POL	5.3	Gas production	RE	XX	XX	G	XX	RE	RE	XX
POL	5.4	Gasoline distribution	XX	XX	XX	G	XX	XX	XX	XX
POL	5.5	Flaring	XX	G	XX	XX	G	XX	XX	G
POL	6.1	Solvent and other product use	XX	XX	RE	G	XX	XX	XX	XX
POL	7.1	Road transport, light duty vehicles	RE	G	RE	G	G	RE	RE	G
POL	7.2	Road transport, heavy duty vehicles	RE	G	RE	G	G	RE	RE	G
POL	7.3	Road transport, mopeds and motorcycles	RE	G	RE	G	G	RE	RE	G
POL	7.4	Road transport, gasoline evaporation	XX	XX	XX	G	XX	XX	XX	XX
POL	7.5	Road transport, wear	XX	XX	XX	XX	XX	RE	RE	XX
POL	8.1	Air transport (<1000m)	RE	XX	XX	G	G	RE	RE	G
POL	8.2	Rail transport	RE	G	RE	G	G	RE	RE	G
POL	8.3	Navigation, non-international	T	T	T	T	T	T	T	T
POL	8.4	Mobile machinery, agriculture	XX	G	RE	G	G	RE	RE	G
POL	8.5	Mobile machinery, industry	XX	G	XX	G	G	RE	RE	G
POL	8.6	Other mobile sources	XX	G	XX	G	G	RE	RE	G
POL	9.1	Landfills	RE	XX	XX	XX	XX	XX	XX	XX
POL	9.2	Controlled waste incineration	XX	XX	XX	XX	XX	RE	RE	XX
POL	9.3	Other waste treatment	RE	G	RE	G	G	RE	RE	G
POL	10.1	Livestock, Cattle	RE	XX	RE	XX	XX	RE	RE	XX
POL	10.2	Livestock, Poultry	RE	XX	RE	XX	XX	RE	RE	XX
POL	10.3	Livestock, Sheep	RE	XX	RE	XX	XX	XX	XX	XX
POL	10.4	Livestock, Goats	RE	XX	RE	XX	XX	XX	XX	XX
POL	10.5	Livestock, Pigs	RE	XX	RE	XX	XX	RE	RE	XX
POL	10.6	Livestock, Other animals	RE	XX	RE	XX	XX	RE	RE	XX
POL	10.7	Crops and pastures	XX	XX	RE	XX	XX	XX	XX	XX
POL	10.8	Agricultural waste burning	RE	G	RE	G	G	RE	RE	G
POL	10.9	Rice cultivation	XX	XX	XX	XX	XX	XX	XX	XX
POL	10.10	Storage and handling of agricultural products	XX	XX	XX	XX	XX	XX	XX	XX
POL	10.11	Other agriculture	XX	XX	XX	XX	XX	XX	XX	XX
ROU	1.1	Power plants	RE	G	RE	G	G	G	G	G
ROU	1.2	Refineries	XX	G	XX	G	G	G	G	G
ROU	2.1	Residential combustion (including commercial/institutional)	RE	G	RE	G	G	G	G	G
ROU	2.2	Agricultural stationary combustion	RE	XX	XX	XX	XX	XX	XX	XX
ROU	34.1	Iron and steel industry (including coke ovens)	XX	G	RE	XX	G	G	G	G
ROU	34.2	Non-ferrous metal industry	XX	XX	XX	XX	XX	G	G	G
ROU	34.3	Chemical industry	RE	G	RE	G	G	G	G	G
ROU	34.4	Paper and pulp industry	XX	G	XX	G	G	G	G	G
ROU	34.5	Cement industry	XX	XX	XX	XX	G	G	G	G
ROU	34.6	Other non-metallic minerals industry	XX	G	RE	XX	G	G	G	G
ROU	34.7	Storage and handling in industry	XX	XX	XX	XX	XX	G	G	XX
ROU	34.8	Other industries	RE	G	RE	G	G	G	G	G
ROU	5.1	Coal production	RE	XX	XX	XX	XX	G	G	XX
ROU	5.2	Oil production	RE	XX	XX	G	XX	XX	XX	XX
ROU	5.3	Gas production	RE	XX	XX	G	XX	XX	XX	XX
ROU	5.4	Gasoline distribution	XX	XX	XX	G	XX	XX	XX	XX
ROU	5.5	Flaring	XX	G	XX	XX	G	G	G	G
ROU	6.1	Solvent and other product use	XX	XX	XX	G	XX	XX	XX	XX
ROU	7.1	Road transport, light duty vehicles	RE	G	RE	G	G	G	G	G
ROU	7.2	Road transport, heavy duty vehicles	RE	G	RE	G	G	G	G	G
ROU	7.3	Road transport, mopeds and motorcycles	RE	G	RE	G	G	G	G	G
ROU	7.4	Road transport, gasoline evaporation	XX	XX	XX	G	XX	XX	XX	XX
ROU	7.5	Road transport, wear	XX	XX	XX	XX	XX	G	G	XX
ROU	8.1	Air transport (<1000m)	RE	G	XX	G	G	G	G	G
ROU	8.2	Rail transport	RE	G	RE	G	G	G	G	G
ROU	8.3	Navigation, non-international	T	T	T	T	T	T	T	T
ROU	8.4	Mobile machinery, agriculture	XX	G	RE	G	G	G	G	G
ROU	8.5	Mobile machinery, industry	XX	G	XX	G	G	G	G	G
ROU	8.6	Other mobile sources	XX	G	XX	G	G	G	G	G
ROU	9.1	Landfills	RE	XX	XX	XX	XX	XX	XX	XX
ROU	9.2	Controlled waste incineration	XX	XX	XX	XX	XX	XX	XX	XX
ROU	9.3	Other waste treatment	RE	G	RE	G	G	G	G	G
ROU	10.1	Livestock, Cattle	RE	XX	RE	XX	XX	G	G	XX
ROU	10.2	Livestock, Poultry	RE	XX	RE	XX	XX	G	G	XX
ROU	10.3	Livestock, Sheep	RE	XX	RE	XX	XX	XX	XX	XX
ROU	10.4	Livestock, Goats	RE	XX	RE	XX	XX	XX	XX	XX
ROU	10.5	Livestock, Pigs	RE	XX	RE	XX	XX	G	G	XX
ROU	10.6	Livestock, Other animals	RE	XX	RE	XX	XX	XX	XX	XX
ROU	10.7	Crops and pastures	XX	XX	RE	XX	XX	XX	XX	XX
ROU	10.8	Agricultural waste burning	RE	G	RE	G	G	G	G	G
ROU	10.9	Rice cultivation	RE	XX	XX	XX	XX	XX	XX	XX
ROU	10.10	Storage and handling of agricultural products	XX	XX	XX	XX	XX	G	G	XX
ROU	10.11	Other agriculture	XX	XX	XX	XX	XX	G	G	XX
SVK	1.1	Power plants	RE	RC	XX	RC	RC	RC	RC	RC
SVK	1.2	Refineries	RE	RC	XX	RC	RC	RC	RC	RC
SVK	2.1	Residential combustion (including commercial/institutional)	RE	RC	RC	RC	RC	RC	RC	RC
SVK	2.2	Agricultural stationary combustion	RE	RC	XX	RC	RC	RC	RC	RC
SVK	34.1	Iron and steel industry (including coke ovens)	RE	RC	RC	RC	RC	RC	RC	RC
SVK	34.2	Non-ferrous metal industry	RE	RC	RC	RC	RC	RC	RC	RC
SVK	34.3	Chemical industry	RE	RC	RC	RC	RC	RC	RC	RC
SVK	34.4	Paper and pulp industry	RE	RC	RC	XX	RC	RC	RC	RC
SVK	34.5	Cement industry	XX	XX	XX	XX	XX	XX	XX	XX
SVK	34.6	Other non-metallic minerals industry	XX	XX	XX	RC	XX	RC	RC	XX
SVK	34.7	Storage and handling in industry	XX	XX	XX	XX	XX	XX	XX	XX
SVK	34.8	Other industries	RE	RC	RC	RC	RC	RC	RC	RC
SVK	5.1	Coal production	RE	XX	XX	XX	XX	XX	XX	XX
SVK	5.2	Oil production	RE	XX	XX	RC	XX	XX	XX	XX
SVK	5.3	Gas production	RE	RC	XX	XX	RC	XX	XX	RC
SVK	5.4	Gasoline distribution	XX	XX	XX	RC	XX	XX	XX	XX
SVK	5.5	Flaring	XX	XX	XX	XX	XX	XX	XX	XX
SVK	6.1	Solvent and other product use	XX	XX	XX	RC	XX	XX	XX	XX
SVK	7.1	Road transport, light duty vehicles	RE	RC	RC	RC	RC	RC	RC	RC
SVK	7.2	Road transport, heavy duty vehicles	RE	RC	RC	RC	RC	RC	RC	RC
SVK	7.3	Road transport, mopeds and motorcycles	RE	RC	RC	RC	RC	RC	RC	RC
SVK	7.4	Road transport, gasoline evaporation	XX	XX	XX	XX	XX	XX	XX	XX
SVK	7.5	Road transport, wear	XX	XX	XX	XX	XX	RC	RC	XX
SVK	8.1	Air transport (<1000m)	RE	RC	XX	RC	RC	RC	RC	RC
SVK	8.2	Rail transport	RE	RC	RC	RC	RC	RC	RC	RC
SVK	8.3	Navigation, non-international	T	T	T	T	T	T	T	T
SVK	8.4	Mobile machinery, agriculture	XX	XX	XX	XX	XX	XX	XX	XX
SVK	8.5	Mobile machinery, industry	XX	XX	XX	XX	XX	XX	XX	XX
SVK	8.6	Other mobile sources	XX	XX	XX	XX	XX	XX	XX	XX
SVK	9.1	Landfills	RE	XX	XX	RC	XX	XX	XX	XX
SVK	9.2	Controlled waste incineration	XX	XX	XX	RC	XX	XX	XX	XX
SVK	9.3	Other waste treatment	RE	XX	XX	XX	XX	XX	XX	XX
SVK	10.1	Livestock, Cattle	RE	XX	RC	XX	XX	XX	XX	XX
SVK	10.2	Livestock, Poultry	RE	XX	RC	XX	XX	XX	XX	XX
SVK	10.3	Livestock, Sheep	RE	XX	RC	XX	XX	XX	XX	XX
SVK	10.4	Livestock, Goats	RE	XX	RC	XX	XX	XX	XX	XX
SVK	10.5	Livestock, Pigs	RE	XX	RC	XX	XX	XX	XX	XX
SVK	10.6	Livestock, Other animals	RE	XX	RC	XX	XX	XX	XX	XX
SVK	10.7	Crops and pastures	XX	XX	RC	XX	XX	XX	XX	XX
SVK	10.8	Agricultural waste burning	RE	RC	RC	RC	RC	RC	RC	RC
SVK	10.9	Rice cultivation	XX	XX	XX	XX	XX	XX	XX	XX
SVK	10.10	Storage and handling of agricultural products	XX	XX	XX	XX	XX	XX	XX	XX
SVK	10.11	Other agriculture	XX	XX	XX	RC	XX	XX	XX	XX
SVN	1.1	Power plants	RE	RC	XX	RC	RC	RC	RC	RC
SVN	1.2	Refineries	RE	RC	XX	RC	RC	RC	RC	RC
SVN	2.1	Residential combustion (including commercial/institutional)	RE	RC	XX	RC	RC	RC	RC	RC
SVN	2.2	Agricultural stationary combustion	RE	XX	XX	XX	XX	XX	XX	XX
SVN	34.1	Iron and steel industry (including coke ovens)	RE	RC	RC	RC	RC	RC	RC	RC
SVN	34.2	Non-ferrous metal industry	RE	RC	RC	RC	RC	RC	RC	RC
SVN	34.3	Chemical industry	RE	RC	RC	RC	RC	RC	RC	RC
SVN	34.4	Paper and pulp industry	RE	RC	RC	RC	RC	RC	RC	RC
SVN	34.5	Cement industry	XX	XX	RC	XX	XX	RC	RC	RC
SVN	34.6	Other non-metallic minerals industry	XX	XX	XX	RC	XX	RC	RC	XX
SVN	34.7	Storage and handling in industry	XX	XX	RC	XX	XX	RC	RC	RC
SVN	34.8	Other industries	RE	RC	RC	RC	RC	RC	RC	RC
SVN	5.1	Coal production	RE	XX	XX	XX	XX	RC	RC	XX
SVN	5.2	Oil production	XX	XX	XX	XX	XX	XX	XX	XX
SVN	5.3	Gas production	RE	XX	XX	XX	XX	XX	XX	XX
SVN	5.4	Gasoline distribution	XX	XX	XX	RC	XX	XX	XX	XX
SVN	5.5	Flaring	XX	XX	XX	XX	XX	XX	XX	XX
SVN	6.1	Solvent and other product use	XX	XX	XX	RC	XX	XX	XX	XX
SVN	7.1	Road transport, light duty vehicles	RE	RC	RC	RC	RC	RC	RC	RC
SVN	7.2	Road transport, heavy duty vehicles	RE	RC	RC	RC	RC	RC	RC	RC
SVN	7.3	Road transport, mopeds and motorcycles	RE	RC	RC	RC	RC	RC	RC	RC
SVN	7.4	Road transport, gasoline evaporation	XX	XX	XX	RC	XX	XX	XX	XX
SVN	7.5	Road transport, wear	XX	XX	XX	XX	XX	RC	RC	XX
SVN	8.1	Air transport (<1000m)	RE	RC	XX	RC	RC	XX	XX	RC
SVN	8.2	Rail transport	RE	RC	XX	RC	RC	RC	RC	RC
SVN	8.3	Navigation, non-international	T	T	T	T	T	T	T	T
SVN	8.4	Mobile machinery, agriculture	XX	RC	RC	RC	RC	RC	RC	RC
SVN	8.5	Mobile machinery, industry	XX	RC	RC	RC	RC	RC	RC	RC
SVN	8.6	Other mobile sources	RE	XX	XX	XX	XX	XX	XX	XX
SVN	9.1	Landfills	RE	XX	XX	XX	XX	RC	RC	XX
SVN	9.2	Controlled waste incineration	XX	XX	XX	XX	XX	XX	XX	XX
SVN	9.3	Other waste treatment	RE	XX	XX	XX	XX	XX	XX	XX
SVN	10.1	Livestock, Cattle	RE	XX	RC	XX	XX	RC	RC	XX
SVN	10.2	Livestock, Poultry	RE	XX	RC	XX	XX	RC	RC	XX
SVN	10.3	Livestock, Sheep	RE	XX	RC	XX	XX	XX	XX	XX
SVN	10.4	Livestock, Goats	RE	XX	RC	XX	XX	XX	XX	XX
SVN	10.5	Livestock, Pigs	RE	XX	RC	XX	XX	RC	RC	XX
SVN	10.6	Livestock, Other animals	RE	XX	RC	XX	XX	RC	RC	XX
SVN	10.7	Crops and pastures	XX	XX	RC	XX	XX	XX	XX	XX
SVN	10.8	Agricultural waste burning	RE	RC	RC	RC	RC	RC	RC	RC
SVN	10.9	Rice cultivation	XX	XX	XX	XX	XX	XX	XX	XX
SVN	10.10	Storage and handling of agricultural products	XX	XX	XX	XX	XX	XX	XX	XX
SVN	10.11	Other agriculture	XX	XX	XX	XX	XX	RC	RC	XX
ALB	1.1	Power plants	G	RC	XX	RC	RC	RC	RC	RC
ALB	1.2	Refineries	G	RC	XX	RC	RC	RC	RC	RC
ALB	2.1	Residential combustion (including commercial/institutional)	G	RC	RC	RC	RC	RC	RC	RC
ALB	2.2	Agricultural stationary combustion	XX	RC	RC	RC	RC	RC	RC	RC
ALB	34.1	Iron and steel industry (including coke ovens)	XX	RC	XX	RC	RC	RC	RC	RC
ALB	34.2	Non-ferrous metal industry	XX	XX	XX	XX	RC	XX	XX	RC
ALB	34.3	Chemical industry	G	XX	XX	XX	XX	RC	RC	XX
ALB	34.4	Paper and pulp industry	XX	XX	XX	XX	XX	XX	XX	XX
ALB	34.5	Cement industry	XX	XX	XX	XX	XX	RC	RC	XX
ALB	34.6	Other non-metallic minerals industry	XX	XX	XX	XX	XX	RC	RC	XX
ALB	34.7	Storage and handling in industry	XX	XX	XX	XX	XX	XX	XX	XX
ALB	34.8	Other industries	G	RC	XX	RC	RC	RC	RC	RC
ALB	5.1	Coal production	G	XX	XX	RC	XX	XX	XX	XX
ALB	5.2	Oil production	XX	XX	XX	RC	XX	XX	XX	XX
ALB	5.3	Gas production	G	XX	XX	RC	XX	XX	XX	XX
ALB	5.4	Gasoline distribution	XX	XX	XX	RC	XX	XX	XX	XX
ALB	5.5	Flaring	XX	XX	XX	XX	XX	XX	XX	XX
ALB	6.1	Solvent and other product use	XX	XX	XX	RC	XX	XX	XX	XX
ALB	7.1	Road transport, light duty vehicles	G	RC	RC	RC	RC	RC	RC	RC
ALB	7.2	Road transport, heavy duty vehicles	XX	RC	RC	RC	RC	RC	RC	RC
ALB	7.3	Road transport, mopeds and motorcycles	XX	XX	XX	XX	XX	XX	XX	XX
ALB	7.4	Road transport, gasoline evaporation	XX	XX	XX	RC	XX	XX	XX	XX
ALB	7.5	Road transport, wear	XX	XX	XX	XX	XX	RC	RC	XX
ALB	8.1	Air transport (<1000m)	XX	RC	XX	RC	RC	RC	RC	RC
ALB	8.2	Rail transport	G	RC	XX	RC	RC	RC	RC	RC
ALB	8.3	Navigation, non-international	T	T	T	T	T	T	T	T
ALB	8.4	Mobile machinery, agriculture	G	RC	RC	RC	RC	RC	RC	RC
ALB	8.5	Mobile machinery, industry	XX	XX	XX	XX	XX	XX	XX	XX
ALB	8.6	Other mobile sources	XX	XX	XX	XX	XX	XX	XX	XX
ALB	9.1	Landfills	G	RC	RC	RC	XX	XX	XX	XX
ALB	9.2	Controlled waste incineration	XX	XX	XX	XX	XX	XX	XX	XX
ALB	9.3	Other waste treatment	G	XX	XX	XX	XX	XX	XX	XX
ALB	10.1	Livestock, Cattle	G	XX	RC	XX	XX	RC	RC	XX
ALB	10.2	Livestock, Poultry	G	XX	RC	XX	XX	RC	RC	XX
ALB	10.3	Livestock, Sheep	XX	XX	RC	XX	XX	RC	RC	XX
ALB	10.4	Livestock, Goats	XX	XX	RC	XX	XX	RC	RC	XX
ALB	10.5	Livestock, Pigs	G	XX	RC	XX	XX	RC	RC	XX
ALB	10.6	Livestock, Other animals	G	XX	RC	XX	XX	RC	RC	XX
ALB	10.7	Crops and pastures	XX	XX	RC	XX	XX	RC	RC	XX
ALB	10.8	Agricultural waste burning	G	RC	RC	RC	RC	RC	RC	RC
ALB	10.9	Rice cultivation	G	XX	XX	XX	XX	XX	XX	XX
ALB	10.10	Storage and handling of agricultural products	XX	XX	XX	XX	XX	XX	XX	XX
ALB	10.11	Other agriculture	XX	XX	XX	XX	XX	XX	XX	XX
ARM	1.1	Power plants	E	E	E	E	E	E	E	E
ARM	1.2	Refineries	E	E	E	E	E	E	E	E
ARM	2.1	Residential combustion (including commercial/institutional)	E	E	E	E	E	E	E	E
ARM	2.2	Agricultural stationary combustion	E	E	E	E	E	E	E	E
ARM	34.1	Iron and steel industry (including coke ovens)	E	E	E	E	E	E	E	E
ARM	34.2	Non-ferrous metal industry	E	E	E	E	E	E	E	E
ARM	34.3	Chemical industry	E	E	E	E	E	E	E	E
ARM	34.4	Paper and pulp industry	E	E	E	E	E	E	E	E
ARM	34.5	Cement industry	E	E	E	E	E	E	E	E
ARM	34.6	Other non-metallic minerals industry	E	E	E	E	E	E	E	E
ARM	34.7	Storage and handling in industry	E	E	E	E	E	E	E	E
ARM	34.8	Other industries	E	E	E	E	E	E	E	E
ARM	5.1	Coal production	E	E	E	E	E	E	E	E
ARM	5.2	Oil production	E	E	E	E	E	E	E	E
ARM	5.3	Gas production	E	E	E	E	E	E	E	E
ARM	5.4	Gasoline distribution	E	E	E	E	E	E	E	E
ARM	5.5	Flaring	E	E	E	E	E	E	E	E
ARM	6.1	Solvent and other product use	E	E	E	E	E	E	E	E
ARM	7.1	Road transport, light duty vehicles	E	E	E	E	E	E	E	E
ARM	7.2	Road transport, heavy duty vehicles	E	E	E	E	E	E	E	E
ARM	7.3	Road transport, mopeds and motorcycles	E	E	E	E	E	E	E	E
ARM	7.4	Road transport, gasoline evaporation	E	E	E	E	E	E	E	E
ARM	7.5	Road transport, wear	E	E	E	E	E	E	E	E
ARM	8.1	Air transport (<1000m)	E	E	E	E	E	E	E	E
ARM	8.2	Rail transport	E	E	E	E	E	E	E	E
ARM	8.3	Navigation, non-international	T	T	T	T	T	T	T	T
ARM	8.4	Mobile machinery, agriculture	E	E	E	E	E	E	E	E
ARM	8.5	Mobile machinery, industry	E	E	E	E	E	E	E	E
ARM	8.6	Other mobile sources	E	E	E	E	E	E	E	E
ARM	9.1	Landfills	E	E	E	E	E	E	E	E
ARM	9.2	Controlled waste incineration	E	E	E	E	E	E	E	E
ARM	9.3	Other waste treatment	E	E	E	E	E	E	E	E
ARM	10.1	Livestock, Cattle	E	E	E	E	E	E	E	E
ARM	10.2	Livestock, Poultry	E	E	E	E	E	E	E	E
ARM	10.3	Livestock, Sheep	E	E	E	E	E	E	E	E
ARM	10.4	Livestock, Goats	E	E	E	E	E	E	E	E
ARM	10.5	Livestock, Pigs	E	E	E	E	E	E	E	E
ARM	10.6	Livestock, Other animals	E	E	E	E	E	E	E	E
ARM	10.7	Crops and pastures	E	E	E	E	E	E	E	E
ARM	10.8	Agricultural waste burning	E	E	E	E	E	E	E	E
ARM	10.9	Rice cultivation	E	E	E	E	E	E	E	E
ARM	10.10	Storage and handling of agricultural products	E	E	E	E	E	E	E	E
ARM	10.11	Other agriculture	E	E	E	E	E	E	E	E
AZE	1.1	Power plants	E	E	E	E	E	E	E	E
AZE	1.2	Refineries	E	E	E	E	E	E	E	E
AZE	2.1	Residential combustion (including commercial/institutional)	E	E	E	E	E	E	E	E
AZE	2.2	Agricultural stationary combustion	E	E	E	E	E	E	E	E
AZE	34.1	Iron and steel industry (including coke ovens)	E	E	E	E	E	E	E	E
AZE	34.2	Non-ferrous metal industry	E	E	E	E	E	E	E	E
AZE	34.3	Chemical industry	E	E	E	E	E	E	E	E
AZE	34.4	Paper and pulp industry	E	E	E	E	E	E	E	E
AZE	34.5	Cement industry	E	E	E	E	E	E	E	E
AZE	34.6	Other non-metallic minerals industry	E	E	E	E	E	E	E	E
AZE	34.7	Storage and handling in industry	E	E	E	E	E	E	E	E
AZE	34.8	Other industries	E	E	E	E	E	E	E	E
AZE	5.1	Coal production	E	E	E	E	E	E	E	E
AZE	5.2	Oil production	E	E	E	E	E	E	E	E
AZE	5.3	Gas production	E	E	E	E	E	E	E	E
AZE	5.4	Gasoline distribution	E	E	E	E	E	E	E	E
AZE	5.5	Flaring	E	E	E	E	E	E	E	E
AZE	6.1	Solvent and other product use	E	E	E	E	E	E	E	E
AZE	7.1	Road transport, light duty vehicles	E	E	E	E	E	E	E	E
AZE	7.2	Road transport, heavy duty vehicles	E	E	E	E	E	E	E	E
AZE	7.3	Road transport, mopeds and motorcycles	E	E	E	E	E	E	E	E
AZE	7.4	Road transport, gasoline evaporation	E	E	E	E	E	E	E	E
AZE	7.5	Road transport, wear	E	E	E	E	E	E	E	E
AZE	8.1	Air transport (<1000m)	E	E	E	E	E	E	E	E
AZE	8.2	Rail transport	E	E	E	E	E	E	E	E
AZE	8.3	Navigation, non-international	T	T	T	T	T	T	T	T
AZE	8.4	Mobile machinery, agriculture	E	E	E	E	E	E	E	E
AZE	8.5	Mobile machinery, industry	E	E	E	E	E	E	E	E
AZE	8.6	Other mobile sources	E	E	E	E	E	E	E	E
AZE	9.1	Landfills	E	E	E	E	E	E	E	E
AZE	9.2	Controlled waste incineration	E	E	E	E	E	E	E	E
AZE	9.3	Other waste treatment	E	E	E	E	E	E	E	E
AZE	10.1	Livestock, Cattle	E	E	E	E	E	E	E	E
AZE	10.2	Livestock, Poultry	E	E	E	E	E	E	E	E
AZE	10.3	Livestock, Sheep	E	E	E	E	E	E	E	E
AZE	10.4	Livestock, Goats	E	E	E	E	E	E	E	E
AZE	10.5	Livestock, Pigs	E	E	E	E	E	E	E	E
AZE	10.6	Livestock, Other animals	E	E	E	E	E	E	E	E
AZE	10.7	Crops and pastures	E	E	E	E	E	E	E	E
AZE	10.8	Agricultural waste burning	E	E	E	E	E	E	E	E
AZE	10.9	Rice cultivation	E	E	E	E	E	E	E	E
AZE	10.10	Storage and handling of agricultural products	E	E	E	E	E	E	E	E
AZE	10.11	Other agriculture	E	E	E	E	E	E	E	E
BIH	1.1	Power plants	G	G	G	G	G	G	G	G
BIH	1.2	Refineries	G	G	XX	G	G	G	G	G
BIH	2.1	Residential combustion (including commercial/institutional)	G	G	G	G	G	G	G	G
BIH	2.2	Agricultural stationary combustion	XX	XX	XX	XX	XX	XX	XX	XX
BIH	34.1	Iron and steel industry (including coke ovens)	XX	G	XX	XX	G	G	G	G
BIH	34.2	Non-ferrous metal industry	XX	XX	XX	XX	XX	XX	XX	XX
BIH	34.3	Chemical industry	XX	XX	G	XX	XX	G	G	G
BIH	34.4	Paper and pulp industry	XX	XX	XX	XX	XX	XX	XX	G
BIH	34.5	Cement industry	XX	XX	XX	XX	G	G	G	G
BIH	34.6	Other non-metallic minerals industry	XX	XX	XX	XX	G	G	G	G
BIH	34.7	Storage and handling in industry	XX	XX	XX	XX	XX	G	G	XX
BIH	34.8	Other industries	G	G	XX	G	G	G	G	G
BIH	5.1	Coal production	G	XX	XX	XX	XX	G	G	XX
BIH	5.2	Oil production	XX	XX	XX	XX	XX	XX	XX	XX
BIH	5.3	Gas production	G	XX	XX	XX	XX	XX	XX	XX
BIH	5.4	Gasoline distribution	XX	XX	XX	G	XX	XX	XX	XX
BIH	5.5	Flaring	XX	XX	XX	XX	XX	XX	XX	XX
BIH	6.1	Solvent and other product use	XX	XX	XX	G	XX	XX	XX	XX
BIH	7.1	Road transport, light duty vehicles	G	G	G	G	G	G	G	G
BIH	7.2	Road transport, heavy duty vehicles	XX	G	XX	XX	XX	XX	XX	XX
BIH	7.3	Road transport, mopeds and motorcycles	XX	G	XX	XX	XX	XX	XX	XX
BIH	7.4	Road transport, gasoline evaporation	XX	XX	XX	G	XX	XX	XX	XX
BIH	7.5	Road transport, wear	XX	XX	XX	XX	XX	G	G	XX
BIH	8.1	Air transport (<1000m)	XX	G	XX	G	G	XX	XX	G
BIH	8.2	Rail transport	G	G	XX	G	G	G	G	G
BIH	8.3	Navigation, non-international	T	T	T	T	T	T	T	T
BIH	8.4	Mobile machinery, agriculture	XX	XX	XX	XX	XX	XX	XX	XX
BIH	8.5	Mobile machinery, industry	XX	XX	XX	XX	XX	XX	XX	XX
BIH	8.6	Other mobile sources	XX	G	XX	XX	XX	XX	XX	XX
BIH	9.1	Landfills	G	XX	XX	XX	XX	XX	XX	XX
BIH	9.2	Controlled waste incineration	XX	XX	XX	XX	XX	XX	XX	XX
BIH	9.3	Other waste treatment	G	XX	G	G	G	G	G	G
BIH	10.1	Livestock, Cattle	G	XX	G	XX	XX	G	G	XX
BIH	10.2	Livestock, Poultry	G	XX	G	XX	XX	G	G	XX
BIH	10.3	Livestock, Sheep	XX	XX	XX	XX	XX	XX	XX	XX
BIH	10.4	Livestock, Goats	XX	XX	XX	XX	XX	XX	XX	XX
BIH	10.5	Livestock, Pigs	G	XX	G	XX	XX	G	G	XX
BIH	10.6	Livestock, Other animals	G	XX	G	XX	XX	XX	XX	XX
BIH	10.7	Crops and pastures	XX	XX	XX	XX	XX	XX	XX	XX
BIH	10.8	Agricultural waste burning	G	G	G	G	G	G	G	G
BIH	10.9	Rice cultivation	XX	XX	XX	XX	XX	XX	XX	XX
BIH	10.10	Storage and handling of agricultural products	XX	XX	XX	XX	XX	G	G	XX
BIH	10.11	Other agriculture	XX	XX	G	XX	XX	G	G	XX
BLR	1.1	Power plants	G	G	G	G	G	G	G	G
BLR	1.2	Refineries	G	G	G	G	G	G	G	G
BLR	2.1	Residential combustion (including commercial/institutional)	G	G	G	G	G	G	G	G
BLR	2.2	Agricultural stationary combustion	XX	XX	XX	XX	XX	XX	XX	XX
BLR	34.1	Iron and steel industry (including coke ovens)	XX	G	XX	XX	XX	G	G	XX
BLR	34.2	Non-ferrous metal industry	XX	XX	XX	XX	XX	XX	XX	XX
BLR	34.3	Chemical industry	G	G	G	G	G	G	G	G
BLR	34.4	Paper and pulp industry	G	G	XX	G	G	G	G	G
BLR	34.5	Cement industry	XX	XX	XX	XX	G	G	G	G
BLR	34.6	Other non-metallic minerals industry	XX	G	XX	XX	G	G	G	G
BLR	34.7	Storage and handling in industry	XX	XX	XX	XX	XX	G	G	XX
BLR	34.8	Other industries	G	G	G	G	G	G	G	G
BLR	5.1	Coal production	G	XX	XX	XX	XX	G	G	XX
BLR	5.2	Oil production	XX	XX	XX	XX	XX	XX	XX	XX
BLR	5.3	Gas production	G	XX	XX	G	XX	XX	XX	XX
BLR	5.4	Gasoline distribution	XX	XX	XX	G	XX	XX	XX	XX
BLR	5.5	Flaring	XX	XX	XX	XX	G	G	G	G
BLR	6.1	Solvent and other product use	XX	XX	XX	G	XX	XX	XX	XX
BLR	7.1	Road transport, light duty vehicles	G	G	G	G	G	G	G	G
BLR	7.2	Road transport, heavy duty vehicles	G	G	G	G	G	G	G	G
BLR	7.3	Road transport, mopeds and motorcycles	G	G	G	G	G	G	G	G
BLR	7.4	Road transport, gasoline evaporation	XX	XX	XX	G	XX	XX	XX	XX
BLR	7.5	Road transport, wear	XX	XX	XX	XX	XX	G	G	XX
BLR	8.1	Air transport (<1000m)	XX	XX	XX	XX	XX	XX	XX	XX
BLR	8.2	Rail transport	G	G	G	G	G	G	G	G
BLR	8.3	Navigation, non-international	T	T	T	T	T	T	T	T
BLR	8.4	Mobile machinery, agriculture	G	G	G	G	G	G	G	G
BLR	8.5	Mobile machinery, industry	G	G	G	G	G	G	G	G
BLR	8.6	Other mobile sources	G	G	G	G	G	G	G	G
BLR	9.1	Landfills	G	XX	XX	XX	XX	XX	XX	XX
BLR	9.2	Controlled waste incineration	XX	XX	XX	XX	XX	XX	XX	XX
BLR	9.3	Other waste treatment	G	XX	G	G	G	G	G	G
BLR	10.1	Livestock, Cattle	G	XX	G	XX	XX	G	G	XX
BLR	10.2	Livestock, Poultry	G	XX	G	XX	XX	G	G	XX
BLR	10.3	Livestock, Sheep	XX	XX	XX	XX	XX	XX	XX	XX
BLR	10.4	Livestock, Goats	XX	XX	XX	XX	XX	XX	XX	XX
BLR	10.5	Livestock, Pigs	G	XX	G	XX	XX	G	G	XX
BLR	10.6	Livestock, Other animals	G	XX	G	XX	XX	XX	XX	XX
BLR	10.7	Crops and pastures	XX	XX	XX	XX	XX	XX	XX	XX
BLR	10.8	Agricultural waste burning	G	G	G	G	G	G	G	G
BLR	10.9	Rice cultivation	XX	XX	XX	XX	XX	XX	XX	XX
BLR	10.10	Storage and handling of agricultural products	XX	XX	XX	XX	XX	G	G	XX
BLR	10.11	Other agriculture	XX	XX	G	XX	XX	G	G	XX
GEO	1.1	Power plants	E	E	E	E	E	E	E	E
GEO	1.2	Refineries	E	E	E	E	E	E	E	E
GEO	2.1	Residential combustion (including commercial/institutional)	E	E	E	E	E	E	E	E
GEO	2.2	Agricultural stationary combustion	E	E	E	E	E	E	E	E
GEO	34.1	Iron and steel industry (including coke ovens)	E	E	E	E	E	E	E	E
GEO	34.2	Non-ferrous metal industry	E	E	E	E	E	E	E	E
GEO	34.3	Chemical industry	E	E	E	E	E	E	E	E
GEO	34.4	Paper and pulp industry	E	E	E	E	E	E	E	E
GEO	34.5	Cement industry	E	E	E	E	E	E	E	E
GEO	34.6	Other non-metallic minerals industry	E	E	E	E	E	E	E	E
GEO	34.7	Storage and handling in industry	E	E	E	E	E	E	E	E
GEO	34.8	Other industries	E	E	E	E	E	E	E	E
GEO	5.1	Coal production	E	E	E	E	E	E	E	E
GEO	5.2	Oil production	E	E	E	E	E	E	E	E
GEO	5.3	Gas production	E	E	E	E	E	E	E	E
GEO	5.4	Gasoline distribution	E	E	E	E	E	E	E	E
GEO	5.5	Flaring	E	E	E	E	E	E	E	E
GEO	6.1	Solvent and other product use	E	E	E	E	E	E	E	E
GEO	7.1	Road transport, light duty vehicles	E	E	E	E	E	E	E	E
GEO	7.2	Road transport, heavy duty vehicles	E	E	E	E	E	E	E	E
GEO	7.3	Road transport, mopeds and motorcycles	E	E	E	E	E	E	E	E
GEO	7.4	Road transport, gasoline evaporation	E	E	E	E	E	E	E	E
GEO	7.5	Road transport, wear	E	E	E	E	E	E	E	E
GEO	8.1	Air transport (<1000m)	E	E	E	E	E	E	E	E
GEO	8.2	Rail transport	E	E	E	E	E	E	E	E
GEO	8.3	Navigation, non-international	T	T	T	T	T	T	T	T
GEO	8.4	Mobile machinery, agriculture	E	E	E	E	E	E	E	E
GEO	8.5	Mobile machinery, industry	E	E	E	E	E	E	E	E
GEO	8.6	Other mobile sources	E	E	E	E	E	E	E	E
GEO	9.1	Landfills	E	E	E	E	E	E	E	E
GEO	9.2	Controlled waste incineration	E	E	E	E	E	E	E	E
GEO	9.3	Other waste treatment	E	E	E	E	E	E	E	E
GEO	10.1	Livestock, Cattle	E	E	E	E	E	E	E	E
GEO	10.2	Livestock, Poultry	E	E	E	E	E	E	E	E
GEO	10.3	Livestock, Sheep	E	E	E	E	E	E	E	E
GEO	10.4	Livestock, Goats	E	E	E	E	E	E	E	E
GEO	10.5	Livestock, Pigs	E	E	E	E	E	E	E	E
GEO	10.6	Livestock, Other animals	E	E	E	E	E	E	E	E
GEO	10.7	Crops and pastures	E	E	E	E	E	E	E	E
GEO	10.8	Agricultural waste burning	E	E	E	E	E	E	E	E
GEO	10.9	Rice cultivation	E	E	E	E	E	E	E	E
GEO	10.10	Storage and handling of agricultural products	E	E	E	E	E	E	E	E
GEO	10.11	Other agriculture	E	E	E	E	E	E	E	E
ISL	1.1	Power plants	RE	RC	XX	RC	RC	XX	XX	RC
ISL	1.2	Refineries	XX	XX	XX	XX	XX	XX	XX	XX
ISL	2.1	Residential combustion (including commercial/institutional)	RE	RC	G	RC	RC	G	G	RC
ISL	2.2	Agricultural stationary combustion	RE	XX	XX	XX	XX	XX	XX	XX
ISL	34.1	Iron and steel industry (including coke ovens)	RE	RC	XX	RC	RC	XX	XX	RC
ISL	34.2	Non-ferrous metal industry	RE	RC	XX	RC	RC	G	G	RC
ISL	34.3	Chemical industry	RE	RC	XX	RC	RC	XX	XX	RC
ISL	34.4	Paper and pulp industry	XX	XX	XX	XX	XX	XX	XX	XX
ISL	34.5	Cement industry	XX	XX	XX	XX	XX	XX	XX	XX
ISL	34.6	Other non-metallic minerals industry	XX	RC	XX	RC	RC	XX	XX	RC
ISL	34.7	Storage and handling in industry	XX	RC	XX	XX	XX	XX	XX	RC
ISL	34.8	Other industries	RE	RC	XX	RC	RC	G	G	RC
ISL	5.1	Coal production	XX	XX	XX	XX	XX	XX	XX	RC
ISL	5.2	Oil production	XX	XX	XX	XX	XX	XX	XX	XX
ISL	5.3	Gas production	XX	XX	XX	XX	XX	XX	XX	XX
ISL	5.4	Gasoline distribution	XX	XX	XX	XX	XX	XX	XX	XX
ISL	5.5	Flaring	XX	XX	XX	XX	XX	XX	XX	XX
ISL	6.1	Solvent and other product use	XX	XX	XX	RC	XX	XX	XX	XX
ISL	7.1	Road transport, light duty vehicles	RE	RC	G	RC	RC	G	G	RC
ISL	7.2	Road transport, heavy duty vehicles	RE	RC	XX	RC	RC	XX	XX	RC
ISL	7.3	Road transport, mopeds and motorcycles	RE	XX	XX	XX	XX	XX	XX	XX
ISL	7.4	Road transport, gasoline evaporation	XX	XX	XX	XX	XX	XX	XX	XX
ISL	7.5	Road transport, wear	XX	XX	XX	XX	XX	XX	XX	XX
ISL	8.1	Air transport (<1000m)	RE	RC	XX	RC	RC	G	G	RC
ISL	8.2	Rail transport	XX	XX	XX	XX	XX	XX	XX	XX
ISL	8.3	Navigation, non-international	T	T	T	T	T	T	T	T
ISL	8.4	Mobile machinery, agriculture	XX	XX	XX	XX	XX	G	G	XX
ISL	8.5	Mobile machinery, industry	XX	RC	XX	RC	RC	G	G	RC
ISL	8.6	Other mobile sources	XX	XX	XX	XX	XX	XX	XX	XX
ISL	9.1	Landfills	RE	XX	XX	XX	XX	XX	XX	XX
ISL	9.2	Controlled waste incineration	RE	RC	XX	RC	RC	XX	XX	RC
ISL	9.3	Other waste treatment	RE	XX	XX	XX	XX	G	G	XX
ISL	10.1	Livestock, Cattle	RE	XX	G	XX	XX	G	G	XX
ISL	10.2	Livestock, Poultry	RE	XX	G	XX	XX	G	G	XX
ISL	10.3	Livestock, Sheep	RE	XX	XX	XX	XX	XX	XX	XX
ISL	10.4	Livestock, Goats	RE	XX	XX	XX	XX	XX	XX	XX
ISL	10.5	Livestock, Pigs	RE	XX	G	XX	XX	G	G	XX
ISL	10.6	Livestock, Other animals	RE	XX	G	XX	XX	XX	XX	XX
ISL	10.7	Crops and pastures	XX	XX	XX	XX	XX	XX	XX	XX
ISL	10.8	Agricultural waste burning	XX	XX	XX	XX	XX	XX	XX	XX
ISL	10.9	Rice cultivation	XX	XX	XX	XX	XX	XX	XX	XX
ISL	10.10	Storage and handling of agricultural products	XX	XX	XX	XX	XX	XX	XX	XX
ISL	10.11	Other agriculture	XX	XX	G	XX	XX	XX	XX	XX
MDA	1.1	Power plants	G	G	G	G	G	G	G	G
MDA	1.2	Refineries	G	XX	G	G	G	G	G	XX
MDA	2.1	Residential combustion (including commercial/institutional)	G	G	G	G	G	G	G	G
MDA	2.2	Agricultural stationary combustion	XX	XX	XX	XX	XX	XX	XX	XX
MDA	34.1	Iron and steel industry (including coke ovens)	XX	G	XX	XX	XX	G	G	XX
MDA	34.2	Non-ferrous metal industry	XX	XX	XX	XX	XX	XX	XX	XX
MDA	34.3	Chemical industry	XX	XX	XX	XX	XX	XX	XX	XX
MDA	34.4	Paper and pulp industry	G	G	XX	XX	G	XX	XX	XX
MDA	34.5	Cement industry	XX	XX	XX	XX	G	G	G	G
MDA	34.6	Other non-metallic minerals industry	XX	G	XX	XX	G	G	G	G
MDA	34.7	Storage and handling in industry	XX	XX	XX	XX	XX	G	G	XX
MDA	34.8	Other industries	G	G	G	G	G	G	G	G
MDA	5.1	Coal production	G	XX	XX	XX	XX	G	XX	XX
MDA	5.2	Oil production	XX	XX	XX	XX	XX	XX	XX	XX
MDA	5.3	Gas production	G	XX	XX	XX	XX	XX	XX	XX
MDA	5.4	Gasoline distribution	XX	XX	XX	G	XX	XX	XX	XX
MDA	5.5	Flaring	XX	XX	XX	XX	XX	XX	XX	XX
MDA	6.1	Solvent and other product use	XX	XX	XX	G	XX	XX	XX	XX
MDA	7.1	Road transport, light duty vehicles	G	G	G	G	G	G	G	G
MDA	7.2	Road transport, heavy duty vehicles	G	G	G	G	G	G	G	G
MDA	7.3	Road transport, mopeds and motorcycles	G	G	XX	G	G	G	G	G
MDA	7.4	Road transport, gasoline evaporation	XX	XX	XX	G	XX	XX	XX	XX
MDA	7.5	Road transport, wear	XX	XX	XX	XX	XX	G	G	XX
MDA	8.1	Air transport (<1000m)	XX	G	XX	G	G	XX	XX	G
MDA	8.2	Rail transport	G	G	XX	G	G	G	G	G
MDA	8.3	Navigation, non-international	T	T	T	T	T	T	T	T
MDA	8.4	Mobile machinery, agriculture	G	G	G	G	G	G	G	G
MDA	8.5	Mobile machinery, industry	XX	G	XX	G	G	G	G	G
MDA	8.6	Other mobile sources	XX	XX	G	G	G	G	G	G
MDA	9.1	Landfills	G	XX	XX	XX	XX	XX	XX	XX
MDA	9.2	Controlled waste incineration	XX	XX	XX	XX	XX	XX	XX	XX
MDA	9.3	Other waste treatment	G	XX	G	G	G	G	G	G
MDA	10.1	Livestock, Cattle	G	XX	G	XX	XX	G	G	XX
MDA	10.2	Livestock, Poultry	G	XX	G	XX	XX	G	G	XX
MDA	10.3	Livestock, Sheep	XX	XX	XX	XX	XX	XX	XX	XX
MDA	10.4	Livestock, Goats	XX	XX	XX	XX	XX	XX	XX	XX
MDA	10.5	Livestock, Pigs	G	XX	G	XX	XX	G	G	XX
MDA	10.6	Livestock, Other animals	G	XX	G	XX	XX	XX	XX	XX
MDA	10.7	Crops and pastures	XX	XX	XX	XX	XX	XX	XX	XX
MDA	10.8	Agricultural waste burning	G	G	G	G	G	G	G	G
MDA	10.9	Rice cultivation	XX	XX	XX	XX	XX	XX	XX	XX
MDA	10.10	Storage and handling of agricultural products	XX	XX	XX	XX	XX	G	G	XX
MDA	10.11	Other agriculture	XX	XX	G	XX	XX	G	G	XX
MKD	1.1	Power plants	G	G	G	G	G	G	G	G
MKD	1.2	Refineries	G	G	XX	G	G	G	G	G
MKD	2.1	Residential combustion (including commercial/institutional)	G	G	G	G	G	G	G	G
MKD	2.2	Agricultural stationary combustion	XX	XX	XX	XX	XX	XX	XX	XX
MKD	34.1	Iron and steel industry (including coke ovens)	XX	G	XX	XX	G	G	G	G
MKD	34.2	Non-ferrous metal industry	XX	G	XX	XX	XX	G	G	G
MKD	34.3	Chemical industry	XX	G	G	G	G	G	G	G
MKD	34.4	Paper and pulp industry	XX	G	XX	G	G	G	G	G
MKD	34.5	Cement industry	XX	XX	XX	XX	G	G	G	G
MKD	34.6	Other non-metallic minerals industry	XX	G	XX	XX	G	G	G	G
MKD	34.7	Storage and handling in industry	XX	XX	XX	XX	XX	G	G	XX
MKD	34.8	Other industries	G	G	G	G	G	G	G	G
MKD	5.1	Coal production	G	XX	XX	XX	XX	G	G	XX
MKD	5.2	Oil production	XX	XX	XX	XX	XX	XX	XX	XX
MKD	5.3	Gas production	XX	XX	XX	XX	XX	XX	XX	XX
MKD	5.4	Gasoline distribution	XX	XX	XX	G	XX	XX	XX	XX
MKD	5.5	Flaring	XX	XX	XX	XX	XX	XX	XX	XX
MKD	6.1	Solvent and other product use	XX	XX	XX	G	XX	XX	XX	XX
MKD	7.1	Road transport, light duty vehicles	G	G	G	G	G	G	G	G
MKD	7.2	Road transport, heavy duty vehicles	G	G	G	G	G	G	G	G
MKD	7.3	Road transport, mopeds and motorcycles	G	G	XX	G	XX	G	G	XX
MKD	7.4	Road transport, gasoline evaporation	XX	XX	XX	G	XX	XX	XX	XX
MKD	7.5	Road transport, wear	XX	XX	XX	XX	XX	G	G	XX
MKD	8.1	Air transport (<1000m)	XX	XX	XX	G	G	XX	XX	G
MKD	8.2	Rail transport	G	G	XX	G	G	G	G	G
MKD	8.3	Navigation, non-international	T	T	T	T	T	T	T	T
MKD	8.4	Mobile machinery, agriculture	G	G	G	G	G	G	G	G
MKD	8.5	Mobile machinery, industry	G	G	XX	G	G	G	G	G
MKD	8.6	Other mobile sources	XX	XX	XX	G	XX	XX	XX	XX
MKD	9.1	Landfills	G	XX	XX	XX	XX	XX	XX	XX
MKD	9.2	Controlled waste incineration	XX	XX	XX	XX	XX	XX	XX	XX
MKD	9.3	Other waste treatment	G	XX	G	G	G	G	G	G
MKD	10.1	Livestock, Cattle	G	XX	G	XX	XX	G	G	XX
MKD	10.2	Livestock, Poultry	G	XX	G	XX	XX	G	G	XX
MKD	10.3	Livestock, Sheep	XX	XX	XX	XX	XX	XX	XX	XX
MKD	10.4	Livestock, Goats	XX	XX	XX	XX	XX	XX	XX	XX
MKD	10.5	Livestock, Pigs	G	XX	G	XX	XX	G	G	XX
MKD	10.6	Livestock, Other animals	G	XX	G	XX	XX	XX	XX	XX
MKD	10.7	Crops and pastures	XX	XX	XX	XX	XX	XX	XX	XX
MKD	10.8	Agricultural waste burning	G	G	G	G	G	G	G	G
MKD	10.9	Rice cultivation	XX	XX	XX	XX	XX	XX	XX	XX
MKD	10.10	Storage and handling of agricultural products	XX	XX	XX	XX	XX	G	G	XX
MKD	10.11	Other agriculture	XX	XX	G	XX	XX	G	G	XX
RUS	1.1	Power plants	G	G	G	G	G	G	G	G
RUS	1.2	Refineries	G	G	G	G	G	G	G	G
RUS	2.1	Residential combustion (including commercial/institutional)	G	G	G	G	G	G	G	G
RUS	2.2	Agricultural stationary combustion	XX	XX	XX	XX	XX	XX	XX	XX
RUS	34.1	Iron and steel industry (including coke ovens)	XX	G	XX	XX	G	G	G	G
RUS	34.2	Non-ferrous metal industry	XX	XX	XX	XX	XX	G	G	G
RUS	34.3	Chemical industry	G	G	G	G	G	G	G	G
RUS	34.4	Paper and pulp industry	G	G	G	G	G	G	G	G
RUS	34.5	Cement industry	XX	XX	XX	XX	G	G	G	G
RUS	34.6	Other non-metallic minerals industry	XX	G	XX	XX	G	G	G	G
RUS	34.7	Storage and handling in industry	XX	XX	XX	XX	XX	G	G	XX
RUS	34.8	Other industries	G	G	G	G	G	G	G	G
RUS	5.1	Coal production	G	XX	XX	XX	XX	G	G	XX
RUS	5.2	Oil production	G	XX	XX	G	XX	XX	XX	XX
RUS	5.3	Gas production	G	XX	XX	G	XX	XX	XX	XX
RUS	5.4	Gasoline distribution	XX	XX	XX	G	XX	XX	XX	XX
RUS	5.5	Flaring	XX	XX	G	XX	G	G	G	G
RUS	6.1	Solvent and other product use	XX	XX	XX	G	XX	XX	XX	XX
RUS	7.1	Road transport, light duty vehicles	G	G	G	G	G	G	G	G
RUS	7.2	Road transport, heavy duty vehicles	G	G	G	G	G	G	G	G
RUS	7.3	Road transport, mopeds and motorcycles	G	G	G	G	G	G	G	G
RUS	7.4	Road transport, gasoline evaporation	XX	XX	XX	G	XX	XX	XX	XX
RUS	7.5	Road transport, wear	XX	XX	XX	XX	XX	G	G	XX
RUS	8.1	Air transport (<1000m)	G	G	XX	G	G	G	G	G
RUS	8.2	Rail transport	G	G	G	G	G	G	G	G
RUS	8.3	Navigation, non-international	T	T	T	T	T	T	T	T
RUS	8.4	Mobile machinery, agriculture	G	G	G	G	G	G	G	G
RUS	8.5	Mobile machinery, industry	G	G	G	G	G	G	G	G
RUS	8.6	Other mobile sources	G	G	G	G	G	G	G	G
RUS	9.1	Landfills	G	XX	XX	XX	XX	XX	XX	XX
RUS	9.2	Controlled waste incineration	XX	XX	XX	XX	XX	XX	XX	XX
RUS	9.3	Other waste treatment	G	XX	G	G	G	G	G	G
RUS	10.1	Livestock, Cattle	G	XX	G	XX	XX	G	G	XX
RUS	10.2	Livestock, Poultry	G	XX	G	XX	XX	G	G	XX
RUS	10.3	Livestock, Sheep	XX	XX	XX	XX	XX	XX	XX	XX
RUS	10.4	Livestock, Goats	XX	XX	XX	XX	XX	XX	XX	XX
RUS	10.5	Livestock, Pigs	G	XX	G	XX	XX	G	G	XX
RUS	10.6	Livestock, Other animals	G	XX	G	XX	XX	XX	XX	XX
RUS	10.7	Crops and pastures	XX	XX	XX	XX	XX	XX	XX	XX
RUS	10.8	Agricultural waste burning	G	G	G	G	G	G	G	G
RUS	10.9	Rice cultivation	XX	XX	XX	XX	XX	XX	XX	XX
RUS	10.10	Storage and handling of agricultural products	XX	XX	XX	XX	XX	G	G	XX
RUS	10.11	Other agriculture	XX	XX	G	XX	XX	G	G	XX
TUR	1.1	Power plants	RE	G	G	G	G	G	G	G
TUR	1.2	Refineries	RE	G	G	G	G	G	G	G
TUR	2.1	Residential combustion (including commercial/institutional)	RE	G	G	G	G	G	G	G
TUR	2.2	Agricultural stationary combustion	RE	XX	XX	XX	XX	XX	XX	XX
TUR	34.1	Iron and steel industry (including coke ovens)	RE	G	XX	XX	G	G	G	G
TUR	34.2	Non-ferrous metal industry	RE	G	XX	XX	XX	G	G	G
TUR	34.3	Chemical industry	RE	G	G	G	G	G	G	G
TUR	34.4	Paper and pulp industry	XX	G	G	G	G	G	G	G
TUR	34.5	Cement industry	XX	XX	XX	XX	G	G	G	G
TUR	34.6	Other non-metallic minerals industry	XX	G	XX	XX	G	G	G	G
TUR	34.7	Storage and handling in industry	XX	XX	XX	XX	XX	G	G	XX
TUR	34.8	Other industries	RE	G	G	G	G	G	G	G
TUR	5.1	Coal production	RE	XX	XX	XX	XX	G	G	XX
TUR	5.2	Oil production	RE	XX	XX	XX	XX	XX	XX	XX
TUR	5.3	Gas production	RE	XX	XX	XX	XX	XX	XX	XX
TUR	5.4	Gasoline distribution	XX	XX	XX	G	XX	XX	XX	XX
TUR	5.5	Flaring	XX	XX	XX	XX	G	G	G	G
TUR	6.1	Solvent and other product use	XX	XX	XX	G	XX	XX	XX	XX
TUR	7.1	Road transport, light duty vehicles	RE	G	G	G	G	G	G	G
TUR	7.2	Road transport, heavy duty vehicles	RE	G	G	G	G	G	G	G
TUR	7.3	Road transport, mopeds and motorcycles	RE	G	G	G	G	G	G	G
TUR	7.4	Road transport, gasoline evaporation	XX	XX	XX	G	XX	XX	XX	XX
TUR	7.5	Road transport, wear	XX	XX	XX	XX	XX	G	G	XX
TUR	8.1	Air transport (<1000m)	RE	G	XX	G	G	G	G	G
TUR	8.2	Rail transport	RE	G	G	G	G	G	G	G
TUR	8.3	Navigation, non-international	T	T	T	T	T	T	T	T
TUR	8.4	Mobile machinery, agriculture	XX	G	G	G	G	G	G	G
TUR	8.5	Mobile machinery, industry	XX	G	XX	G	G	G	G	G
TUR	8.6	Other mobile sources	XX	G	XX	G	G	G	G	G
TUR	9.1	Landfills	RE	XX	XX	XX	XX	XX	XX	XX
TUR	9.2	Controlled waste incineration	XX	XX	XX	XX	XX	XX	XX	XX
TUR	9.3	Other waste treatment	RE	XX	G	G	XX	G	G	XX
TUR	10.1	Livestock, Cattle	RE	XX	G	XX	XX	G	G	XX
TUR	10.2	Livestock, Poultry	RE	XX	G	XX	XX	G	G	XX
TUR	10.3	Livestock, Sheep	RE	XX	XX	XX	XX	XX	XX	XX
TUR	10.4	Livestock, Goats	RE	XX	XX	XX	XX	XX	XX	XX
TUR	10.5	Livestock, Pigs	RE	XX	G	XX	XX	G	XX	XX
TUR	10.6	Livestock, Other animals	RE	XX	G	XX	XX	XX	XX	XX
TUR	10.7	Crops and pastures	XX	XX	XX	XX	XX	XX	XX	XX
TUR	10.8	Agricultural waste burning	RE	XX	G	G	G	G	G	G
TUR	10.9	Rice cultivation	RE	XX	XX	XX	XX	XX	XX	XX
TUR	10.10	Storage and handling of agricultural products	XX	XX	XX	XX	XX	XX	XX	XX
TUR	10.11	Other agriculture	XX	XX	G	XX	XX	XX	XX	XX
UKR	1.1	Power plants	G	G	G	G	G	G	G	G
UKR	1.2	Refineries	G	G	G	G	G	G	G	G
UKR	2.1	Residential combustion (including commercial/institutional)	G	G	G	G	G	G	G	G
UKR	2.2	Agricultural stationary combustion	XX	XX	XX	XX	XX	XX	XX	XX
UKR	34.1	Iron and steel industry (including coke ovens)	XX	G	XX	XX	G	G	G	G
UKR	34.2	Non-ferrous metal industry	XX	G	XX	XX	XX	G	G	G
UKR	34.3	Chemical industry	G	G	G	G	G	G	G	G
UKR	34.4	Paper and pulp industry	G	G	XX	XX	G	G	XX	G
UKR	34.5	Cement industry	XX	XX	XX	XX	G	G	G	G
UKR	34.6	Other non-metallic minerals industry	XX	G	XX	XX	G	G	G	G
UKR	34.7	Storage and handling in industry	XX	XX	XX	XX	XX	G	G	XX
UKR	34.8	Other industries	G	G	G	G	G	G	G	G
UKR	5.1	Coal production	G	XX	XX	XX	XX	G	G	XX
UKR	5.2	Oil production	G	XX	XX	XX	XX	XX	XX	XX
UKR	5.3	Gas production	G	XX	XX	XX	XX	XX	XX	XX
UKR	5.4	Gasoline distribution	XX	XX	XX	G	XX	XX	XX	XX
UKR	5.5	Flaring	XX	XX	G	XX	G	G	G	G
UKR	6.1	Solvent and other product use	XX	XX	XX	G	XX	XX	XX	XX
UKR	7.1	Road transport, light duty vehicles	G	G	G	G	G	G	G	G
UKR	7.2	Road transport, heavy duty vehicles	G	G	G	G	G	G	G	G
UKR	7.3	Road transport, mopeds and motorcycles	G	G	G	G	G	G	G	G
UKR	7.4	Road transport, gasoline evaporation	XX	XX	XX	G	XX	XX	XX	XX
UKR	7.5	Road transport, wear	XX	XX	XX	XX	XX	G	G	XX
UKR	8.1	Air transport (<1000m)	G	G	XX	G	G	G	G	G
UKR	8.2	Rail transport	G	G	G	G	G	G	G	G
UKR	8.3	Navigation, non-international	T	T	T	T	T	T	T	T
UKR	8.4	Mobile machinery, agriculture	G	G	G	G	G	G	G	G
UKR	8.5	Mobile machinery, industry	G	G	G	G	G	G	G	G
UKR	8.6	Other mobile sources	G	G	G	G	G	G	G	G
UKR	9.1	Landfills	G	XX	XX	XX	XX	XX	XX	XX
UKR	9.2	Controlled waste incineration	XX	XX	XX	XX	XX	XX	XX	XX
UKR	9.3	Other waste treatment	G	XX	G	G	G	G	G	G
UKR	10.1	Livestock, Cattle	G	XX	G	XX	XX	G	G	XX
UKR	10.2	Livestock, Poultry	G	XX	G	XX	XX	G	G	XX
UKR	10.3	Livestock, Sheep	XX	XX	XX	XX	XX	XX	XX	XX
UKR	10.4	Livestock, Goats	XX	XX	XX	XX	XX	XX	XX	XX
UKR	10.5	Livestock, Pigs	G	XX	G	XX	XX	G	G	XX
UKR	10.6	Livestock, Other animals	G	XX	G	XX	XX	XX	XX	XX
UKR	10.7	Crops and pastures	XX	XX	XX	XX	XX	XX	XX	XX
UKR	10.8	Agricultural waste burning	G	G	G	G	G	G	G	G
UKR	10.9	Rice cultivation	G	XX	XX	XX	XX	XX	XX	XX
UKR	10.10	Storage and handling of agricultural products	XX	XX	XX	XX	XX	G	G	XX
UKR	10.11	Other agriculture	XX	XX	G	XX	XX	G	G	XX
YUG	1.1	Power plants	G	G	G	G	G	G	G	G
YUG	1.2	Refineries	G	G	XX	G	G	G	G	G
YUG	2.1	Residential combustion (including commercial/institutional)	G	G	G	G	G	G	G	G
YUG	2.2	Agricultural stationary combustion	XX	XX	XX	XX	XX	XX	XX	XX
YUG	34.1	Iron and steel industry (including coke ovens)	XX	G	XX	XX	G	G	G	G
YUG	34.2	Non-ferrous metal industry	XX	G	XX	XX	XX	G	G	G
YUG	34.3	Chemical industry	G	G	G	G	G	G	G	G
YUG	34.4	Paper and pulp industry	XX	XX	XX	XX	XX	XX	XX	G
YUG	34.5	Cement industry	XX	XX	XX	XX	G	G	G	G
YUG	34.6	Other non-metallic minerals industry	XX	G	XX	XX	G	G	G	G
YUG	34.7	Storage and handling in industry	XX	XX	XX	XX	XX	G	G	XX
YUG	34.8	Other industries	G	G	G	G	G	G	G	G
YUG	5.1	Coal production	G	XX	XX	XX	XX	G	G	XX
YUG	5.2	Oil production	G	XX	XX	XX	XX	XX	XX	XX
YUG	5.3	Gas production	G	XX	XX	XX	XX	XX	XX	XX
YUG	5.4	Gasoline distribution	XX	XX	XX	G	XX	XX	XX	XX
YUG	5.5	Flaring	XX	G	XX	XX	G	G	G	G
YUG	6.1	Solvent and other product use	XX	XX	XX	G	XX	XX	XX	XX
YUG	7.1	Road transport, light duty vehicles	G	G	G	G	G	G	G	G
YUG	7.2	Road transport, heavy duty vehicles	G	G	G	G	G	G	G	G
YUG	7.3	Road transport, mopeds and motorcycles	G	G	G	G	G	G	G	G
YUG	7.4	Road transport, gasoline evaporation	XX	XX	XX	G	XX	XX	XX	XX
YUG	7.5	Road transport, wear	XX	XX	XX	XX	XX	G	G	XX
YUG	8.1	Air transport (<1000m)	XX	XX	XX	G	G	XX	XX	G
YUG	8.2	Rail transport	XX	XX	XX	XX	XX	XX	XX	XX
YUG	8.3	Navigation, non-international	T	T	T	T	T	T	T	T
YUG	8.4	Mobile machinery, agriculture	XX	G	XX	XX	XX	XX	XX	XX
YUG	8.5	Mobile machinery, industry	G	G	G	G	G	G	G	G
YUG	8.6	Other mobile sources	XX	G	XX	G	XX	XX	XX	XX
YUG	9.1	Landfills	G	XX	XX	XX	XX	XX	XX	XX
YUG	9.2	Controlled waste incineration	XX	XX	XX	XX	XX	XX	XX	XX
YUG	9.3	Other waste treatment	G	G	G	G	G	G	G	G
YUG	10.1	Livestock, Cattle	G	XX	G	XX	XX	G	G	XX
YUG	10.2	Livestock, Poultry	G	XX	G	XX	XX	G	G	XX
YUG	10.3	Livestock, Sheep	XX	XX	XX	XX	XX	XX	XX	XX
YUG	10.4	Livestock, Goats	XX	XX	XX	XX	XX	XX	XX	XX
YUG	10.5	Livestock, Pigs	G	XX	G	XX	XX	G	G	XX
YUG	10.6	Livestock, Other animals	G	XX	G	XX	XX	XX	XX	XX
YUG	10.7	Crops and pastures	XX	XX	XX	XX	XX	XX	XX	XX
YUG	10.8	Agricultural waste burning	G	G	G	G	G	G	G	G
YUG	10.9	Rice cultivation	XX	XX	XX	XX	XX	XX	XX	XX
YUG	10.10	Storage and handling of agricultural products	XX	XX	XX	XX	XX	G	G	XX
YUG	10.11	Other agriculture	XX	XX	G	XX	XX	G	G	XX
