# Supplementary material for: TNO-MACC_II emission inventory; a multi-year (2003–2009) consistent high-resolution European emission inventory for air quality modelling
Source: Copernicus journal article supplement (doi:10.5194/acp-14-10963-2014), 2014-10-17
Supplement: Supplementary file 5 [file 3_Sectors for spatial distribution.xlsx]

## Sheet: Sectors_for_gridding
SectorNo.	SectorDetail	P/A	Proxy for spatial distribution
1.1	Power plants - coal	P	E-PRTR or TNO PS information
1.1	Power plants - light liquid fuels	P	E-PRTR or TNO PS information
1.1	Power plants - medium liquid fuels	P	E-PRTR or TNO PS information
1.1	Power plants - heavy liquid fuels	P	E-PRTR or TNO PS information
1.1	Power plants - gas	P	E-PRTR or TNO PS information
1.1	Power plants - solid biomass	P	E-PRTR or TNO PS information
1.1	Power plants - waste fuels	P	E-PRTR or TNO PS information
1.2	Refineries	P	E-PRTR or TNO PS information
2.1	Residential combustion - coal	A	Rural population
2.1	Residential combustion - light liquid fuels	A	Total population
2.1	Residential combustion - medium liquid fuels	A	Total population
2.1	Residential combustion - heavy liquid fuels	A	Rural population
2.1	Residential combustion - gas	A	Total population
2.1	Residential combustion - solid biomass	A	Wood use map
2.2	Agricultural stationary combustion	A	Arable land
3.1	Iron and steel industry, coke ovens	P	TNO PS information
3.1	Iron and steel industry, sinter production	P	TNO PS information
3.1	Iron and steel industry, pellet production	P	TNO PS information
3.1	Iron and steel industry, pig iron	P	TNO PS information
3.1	Iron and steel industry, cast iron	P	TNO PS information
3.1	Iron and steel industry, basic oxygen furnace	P	TNO PS information
3.1	Iron and steel industry, open hearth furnace	P	TNO PS information
3.1	Iron and steel industry, electric arc furnace	P	TNO PS information
3.2	Non-metallic minerals, aluminium	P	E-PRTR or TNO PS information
3.2	Non-metallic minerals, non-aluminium	P	E-PRTR or TNO PS information
3.3	Chemical industry	P	E-PRTR or TNO PS information
3.4	Paper and pulp industry	P	E-PRTR or TNO PS information
3.5	Cement production	P	E-PRTR or TNO PS information
3.6	Non-metallic mineral production other than cement	A	Total population
3.7	Storage and handling	P	TNO PS information
3.8	Other industry	A	Total population
5.1	Coal production	P	E-PRTR or TNO PS information
5.2	Oil production	P	E-PRTR or TNO PS information
5.3	Gas production, production	P	E-PRTR or TNO PS information
5.3	Gas production, high pressure distribution	A	Gas lines network
5.3	Gas production, low pressure distribution	A	Urban population
5.4	Gasoline distribution	A	TRANSTOOLS network and Total population
5.5	Flaring	P	E-PRTR or TNO PS information
6.1	Industrial, domestic and constructional solvent use	A	Total population
7.1	Road transport, light duty vehicles - gasoline	A	TRANSTOOLS network and Total population
7.1	Road transport, light duty vehicles - diesel	A	TRANSTOOLS network and Total population
7.1	Road transport, light duty vehicles - LPG/gas	A	TRANSTOOLS network and Total population
7.2	Road transport, heavy duty vehicles - gasoline	A	TRANSTOOLS network and Total population
7.2	Road transport, heavy duty vehicles - diesel	A	TRANSTOOLS network and Total population
7.2	Road transport, heavy duty vehicles - LPG/gas	A	TRANSTOOLS network and Total population
7.3	Road transport, motorcycles - gasoline	A	TRANSTOOLS network and Total population
7.3	Road transport, mopeds - gasoline	A	Total population
7.4	Road transport, gasoline evaporation	A	Total population
7.5	Road transport, wear, LDV	A	TRANSTOOLS network and Total population
7.5	Road transport, wear, HDV	A	TRANSTOOLS network and Total population
7.5	Road transport, wear, motorcycles	A	TRANSTOOLS network and Total population
7.5	Road transport, wear, mopeds	A	Total population
8.1	Non road transport, aviation	P	TNO PS information
8.2	Non road transport, rail	A	Rail map
8.3	Non-road transport, shipping, inland waterways	A	Inland shipping map
8.3	Non-road transport, shipping, coastal	A	Coastal shipping map
8.4	Mobile machinery, agriculture	A	Arable land
8.5	Mobile machinery, manufacturing industry	A	Total population
8.6	Other mobile sources	A	Total population
9.1	Landfills	P/A	E-PRTR or Rural population
9.2	Controlled waste incineration	P/A	E-PRTR or Rural population
9.3	BBQ and tobacco	A	Total population
9.3	Uncontrolled waste incineration	A	Rural population
9.3	Other waste	A	Rural population
10.1	Cattle	A	Livestock map for cattle
10.2	Poultry	A	Livestock map for poultry
10.3	Sheep	A	Livestock map for other animals
10.4	Goats	A	Livestock map for other animals
10.5	Pigs	A	Livestock map for pigs
10.6	Other animals	A	Livestock map for other animals
10.7	Crops and pastures	A	Arable land
10.8	Agricultural waste burning	A	Arable land
10.9	Rice cultivation	A	Arable land
10.10	Storage and handling of agricultural products	A	Total population
10.11	Other agriculture	A	Total population
