# Supplementary material for: TNO-MACC_II emission inventory; a multi-year (2003–2009) consistent high-resolution European emission inventory for air quality modelling
Source: Copernicus journal article supplement (doi:10.5194/acp-14-10963-2014), 2014-10-17
Supplement: Supplementary file 7 [file 4_Resulting_emissions_clean.xlsx]

## Sheet: Emissions_overview_summary
	This sheet shows total emissions for each pollutant by year (2003-2009) and by countries. Sea regions are included separately.
		CH4	CH4	CH4	CH4	CH4	CH4	CH4	CO	CO	CO	CO	CO	CO	CO	NMVOC	NMVOC	NMVOC	NMVOC	NMVOC	NMVOC	NMVOC	NH3	NH3	NH3	NH3	NH3	NH3	NH3	NOX	NOX	NOX	NOX	NOX	NOX	NOX	PM10	PM10	PM10	PM10	PM10	PM10	PM10	PM2_5	PM2_5	PM2_5	PM2_5	PM2_5	PM2_5
		CH4							CO							NMVOC							NH3							NOX							PM10							PM2.5
Country (ISO3)		2003	2004	2005	2006	2007	2008	2009	2003	2004	2005	2006	2007	2008	2009	2003	2004	2005	2006	2007	2008	2009	2003	2004	2005	2006	2007	2008	2009	2003	2004	2005	2006	2007	2008	2009	2003	2004	2005	2006	2007	2008	2009	2003	2004	2005	2006	2007	2008
EU15, including Norway and Switzerland	AUT	306.727	300.015	293.156	287.121	282.197	275.493	272.866	871.518	832.788	817.573	769.095	717.681	678.37	645.745	173.247	154.466	164.149	172.867	159.533	150.125	122.813	63.6247	62.8634	62.6789	62.5657	63.4466	62.7105	63.4783	232.691	230.918	236.181	222.561	216.273	203.855	186.609	37.9678	38.0402	38.5515	36.8214	36.331	36.6446	35.0225	22.338	22.0511	22.6359	21.301	20.8612	20.6416
	BEL	342.212	336.726	326.97	321.238	319.2	311.976	308.267	956.125	902.621	794.429	766.187	604.019	598.336	370.386	171.537	159.46	154.608	147.225	126.777	119.282	109.504	77.634	72.3913	71.6198	71.3672	68.0252	67.5479	66.91	298.159	301.261	291.427	269.401	264.062	242.277	214.203	46.1486	44.7232	37.4071	35.8574	31.3565	29.8202	24.1654	30.6275	29.6764	26.7693	25.8593	22.2103	21.0364
	CHE	180.363	179.453	180.003	180.448	180.319	184.265	181.96	349.539	331.447	317.429	293.731	273.686	263.698	250.594	112.643	102.962	98.9422	95.2099	91.428	89.4972	86.8316	62.8918	62.3699	63.1192	63.4085	63.9175	64.4744	63.5425	93.3515	91.091	89.8141	86.0724	82.4833	79.4706	76.3719	21.4214	21.2992	21.313	21.0656	20.7583	20.8314	20.5279	10.5336	10.3226	10.2351	9.94992	9.53666	9.5634
	DEU	3662.74	3320.38	3151.79	2957.44	2804.27	2754.77	2577.37	4171.62	3946.13	3731.3	3663.22	3568.49	3502.84	3099.76	1177.09	1187.11	1163.26	1157.08	1097.56	1045.47	1029.72	588.753	583.981	578.368	573.683	577.349	584.105	597.325	1550.67	1514.22	1457.31	1460.76	1402.7	1336.7	1245.17	228.105	225.037	217.637	217.278	211.055	191.506	181.54	130.133	127.528	122.674	121.244	114.931	106.851
	DNK	283.402	276.926	273.884	276.265	280.845	279.228	279.35	437.625	425.8	434.841	428.275	439.855	418.814	390.128	121.455	118.768	116.341	111.621	105.988	102.025	94.6544	88.3066	87.8211	83.5553	80.3508	79.6424	77.9904	76.7269	201.168	185.465	177.099	178.253	164.751	146.221	127.017	30.1151	30.2926	31.5026	32.703	36.0735	33.2881	30.606	23.0329	23.319	24.5991	25.7059	29.1122	26.8287
	ESP	1740.03	1733.6	1740.84	1758.94	1791.23	1758.58	1770.62	1979.67	1917.94	1830.05	1726.49	1704.62	1602.13	1377.23	874.428	867.228	839.947	813.189	801.681	752.977	668.584	390.358	384.53	367.06	376.836	386.871	355.693	355.754	1333.75	1379.15	1372.26	1321.44	1324.62	1144.41	1025.89	160.697	157.888	153.921	149.346	151.078	135.553	124.814	115.159	112.331	110.364	106.795	108.138	98.8084
	FIN	231.054	223.38	212.825	215.96	210.249	204.903	201.652	564.136	550.906	522.211	511.044	501.324	485.656	465.634	137.365	132.129	123.413	124.136	121.008	113.389	106.921	33.178	33.315	36.219	36.381	38.3126	37.8001	36.6682	216.85	202.952	175.612	190.936	183.192	164.898	151.557	54.7946	56.6124	51.182	54.536	48.0729	52.4351	51.496	38.1866	38.1944	33.89	34.6037	34.1921	38.2892
	FRA	3221.92	3167.87	3137.03	3119.19	3122.37	3143.04	3098.27	5675.4	5828.15	5324.64	4801.35	4542.78	4401.81	3877.32	1362.78	1281.06	1189.17	1086.91	1007.36	934.383	853.039	763.474	756.31	750.535	744.699	744.442	759.554	743.863	1499.44	1467.54	1439.59	1370.35	1309.65	1215.81	1130.03	527.025	519.569	494.746	477.049	462.054	455.877	436.855	346.579	338.211	319.785	303.275	289.99	285.116
	GBR	2819.76	2709.82	2585.55	2496.12	2363.71	2309.44	2273.03	4188.07	3883.88	3480.83	3269.81	3049.24	2869.99	2265.73	1246.68	1153.39	1079.02	1032.4	1002.68	927.406	824.73	308.928	313.774	308.678	308.907	300.837	287.515	287.325	1681.16	1634.07	1601.8	1541.16	1457.95	1294.78	1126.45	139.384	137.966	133.955	133.36	130.734	126.41	116.079	85.3896	84.2597	82.1696	80.7698	78.3716	75.2062
	GRC	519.399	522.614	512.483	508.236	501.346	491.098	487.777	925.321	876.045	834.938	772.935	717.834	631.01	630.968	312.844	306.783	300.729	283.879	267.039	250.201	233.359	70.4291	69.4571	68.4851	67.5131	66.5412	64.417	64.0984	333.665	333.874	334.084	322.266	310.452	298.638	286.823	80.0812	79.1193	78.1618	75.3249	72.4918	69.6579	66.8263	53.4268	53.153	52.8792	51.1925	49.5081	47.8248
	IRL	663.195	626.682	617.938	618.212	595.183	589.504	579.907	213.825	203.732	193.576	184.555	173.747	165.414	158.321	60.956	58.0462	56.4082	55.1235	53.6287	51.9352	48.971	114.899	113.72	113.263	112.383	107.606	107.385	107.769	127.155	126.729	128.013	122.576	121.327	112.486	90.3599	16.6891	16.7602	17.5324	16.3998	15.5683	15.1684	13.6767	11.0404	11.1073	11.538	10.8604	10.4375	10.0978
	ITA	2069.58	1999.54	1985.11	1909.08	1898.53	1845.93	1805.91	3746.77	3559.04	3164.88	2954.46	2805.69	2674.8	2437.05	1297.75	1252.9	1176.56	1148.3	1122.72	1068.99	1019.55	435.454	427.757	416.108	411.116	419.758	408.911	391.376	1305.77	1268.87	1189.51	1139.44	1109.57	1038.57	958.729	186.067	190.828	176.829	174.4	180.215	175.82	168.329	152.927	157.463	144.115	142.301	148.008	144.27
	LUX	22.0126	21.7226	21.6803	21.4634	21.2352	21.3589	21.3456	16.8786	15.7914	14.5404	13.7406	13.7627	12.7012	11.5395	16.4853	15.3454	14.215	13.1952	12.1782	11.1622	10.1446	4.99767	4.91034	4.87864	4.85833	4.82203	4.63324	4.4509	48.346	49.7995	51.2542	48.2892	45.3286	42.3669	39.4045	3.8473	3.97247	4.09582	3.98942	3.88301	3.77563	3.66932	2.87642	2.98499	3.0947	2.98557	2.87644	2.76833
	NLD	858.703	845.141	828.584	808.458	810.149	819.269	813.22	661.692	672.191	644.302	637.392	619.79	625.593	576.844	180.856	170.245	174.565	165.347	163.045	162.525	152.684	133.813	131.697	129.348	130.341	129.019	116.43	114.805	370.466	355.827	342.953	328.74	311.978	301.462	277.411	32.9203	32.4975	31.7887	31.0913	30.9005	30.1599	28.4045	19.6635	18.4373	18.0617	17.109	16.8438	15.9831
	NOR	230.847	228.081	217.29	210.169	217.967	210.134	207.489	454.448	416.915	387.227	363.573	347.05	331.539	318.532	302.295	270.371	225.154	196.267	192.685	160.383	143.624	23.026	23.1176	23.1278	22.701	22.9095	22.8595	22.918	222.058	223.577	226.922	219.695	219.177	207.242	197.308	63.576	60.3653	57.559	54.6669	53.1536	49.7748	49.0117	57.2703	54.1228	50.7137	47.8381	45.5988	43.461
	PRT	613.484	608.134	598.386	607.009	590.085	606.295	614.256	522.615	517.578	505.951	485.422	472.395	475.054	441.318	217.572	214.13	208.44	204.632	201.146	196.067	182.555	54.1931	54.9868	52.8797	51.1571	52.1018	50.2846	49.4575	285.872	288.954	292.789	270.929	259.706	247.369	239.399	105.967	113.97	117.459	110.147	108.627	108.232	107.959	79.5549	83.409	83.0222	80.0031	80.1578	78.6788
	SWE	286.438	287.431	281.468	277.186	266.457	256.091	250.768	590.529	560.161	558.492	526.356	521.177	509.94	512.686	182.182	180.885	178.555	176.155	177.321	175.554	174.549	52.7698	53.0823	52.5145	51.9391	50.3232	49.7055	47.983	213.487	202.631	195.442	188.081	180.328	170.226	168.802	41.447	42.0511	42.1581	41.8634	41.6973	40.6091	39.698	29.3859	29.736	29.9746	29.3851	29.2408	28.3168
EU13 (New Member States)	BGR	594.76	587.959	536.679	539.409	542.017	529.12	494.709	450.949	444.833	439.794	472.468	453.004	454.093	454.093	139.185	136.662	134.146	131.338	128.54	125.744	122.943	66.2576	65.2464	64.2392	63.6896	63.148	62.6132	62.0712	218.702	217.341	223.983	231.475	240.533	235.024	191.506	74.1609	74.8799	75.6044	70.6847	65.7651	60.8454	55.9257	49.4761	50.0942	50.7161	48.1394	45.5643	42.9894
	CYP	51.0604	51.2669	50.8094	51.4655	52.3828	51.5882	49.3969	31.0403	28.3245	26.0292	24.6873	24.1997	22.3666	20.2458	11.7901	11.4042	11.0689	10.8983	10.7049	9.53231	8.71676	6.03885	5.95016	5.64954	5.35592	5.23617	5.37414	5.20974	21.0435	20.705	20.5275	20.3792	20.8549	19.5399	19.2182	5.36565	4.81847	4.38271	4.22716	4.35708	4.22198	3.59986	3.65387	3.12332	2.80699	2.7041	2.79112	2.727
	CZE	843.404	821.707	824.774	862.806	821.277	813.908	769.935	1043.57	1035.7	933.636	903.304	814.406	790.124	790.417	277.952	270.921	263.896	257.095	250.302	243.506	236.709	82.0327	80.6583	79.2919	78.4897	77.6979	76.9093	76.1151	293.088	291.307	289.53	274.959	260.392	245.823	231.255	52.3649	50.1075	47.8501	47.2703	46.6909	46.112	45.5312	37.1612	35.5484	33.9367	33.631	33.3247	33.0207
	EST	77.6454	81.1449	80.0655	80.2053	79.0515	77.4904	67.2554	174.129	171.104	157.611	143.665	162.461	166.513	168.147	41.3794	41.0425	38.3691	36.7974	37.821	35.6123	33.6722	10.1301	10.3127	9.90778	9.95966	10.2758	10.8904	10.0061	40.9506	38.317	35.9256	34.8544	38.1136	35.2012	29.5096	30.8219	30.9961	27.7088	21.2714	29.8623	26.279	24.1462	21.573	22.7839	20.6245	15.9585	21.0262	20.7495
	HRV	149.608	149.07	148.541	153.201	157.869	162.541	167.208	390.47	374.68	353.338	354.115	335.504	293.316	288.914	97.2325	103.422	108.311	116.691	120.374	114.372	82.9788	41.8721	44.4668	41.3377	40.7981	41.1419	38.7719	36.6492	77.2437	77.3958	80.7937	81.681	87.5345	83.8328	76.1993	19.2305	19.8117	19.6985	18.8364	18.7612	18.1673	17.1857	14.2943	14.6417	14.5967	13.8388	13.5867	13.096
	HUN	478.145	454.106	441.763	437.403	431.089	421.539	414.019	615.35	501.176	434.785	370.933	313.881	266.773	270.304	168.509	163.999	159.496	154.918	150.346	145.777	141.204	77.0669	77.0431	77.0229	75.9225	74.8297	73.7427	72.6493	176.95	176.028	175.11	169.536	163.966	158.395	152.823	53.2326	47.7785	42.3289	41.7232	41.1179	40.5117	39.9036	35.9714	32.1155	28.2592	27.7926	27.3264	26.8594
	LTU	172.312	171.758	171.312	175.411	179.058	177.888	172.775	220.534	216.646	214.017	204.956	213.953	220.6	201.024	77.6985	78.5403	79.3845	76.8768	74.3748	71.8735	69.3699	41.5345	42.7685	44.0073	44.7081	45.4117	46.1163	46.8193	57.761	58.9517	60.1472	57.1315	54.1181	51.1071	48.0938	18.7491	18.9273	19.1077	18.7514	18.3958	18.0434	17.692	13.1342	13.2646	13.3978	13.1591	12.9198	12.6851
	LVA	87.1159	88.1327	88.936	85.8334	87.9389	89.6714	88.6926	272.544	269.345	267.959	264.639	252.596	237.282	252.312	66.2031	75.7079	74.9088	76.4209	85.012	75.4424	62.115	15.3765	15.1191	15.809	15.9388	16.6224	16.717	16.7201	39.6782	39.1581	37.595	37.6065	38.5979	34.498	29.2871	20.0777	20.022	19.9665	19.844	19.7221	19.5987	19.4765	16.1892	16.2264	16.2634	16.167	16.0716	15.9747
	MLT	10.9408	11.2765	11.5947	11.9531	12.3551	12.5252	12.8112	15.4887	12.8048	10.3682	10.1741	8.49319	5.94202	4.97807	2.82894	3.15817	3.20489	3.45231	3.1977	2.86195	2.86195	1.67673	1.74286	1.60465	1.59603	1.6919	1.53687	1.53687	9.01979	8.52301	8.31048	8.31028	8.24552	7.98706	7.49078	2.01099	2.01821	2.15218	2.14454	2.18218	2.20663	2.20663	1.28385	1.26088	1.33457	1.35442	1.37873	1.37657
	POL	2415.75	2386.91	2391.67	2381.2	2301.4	2223.61	2114	2573.57	2600.92	2537.62	2609.54	2471.17	2452.07	2360.02	591.886	569.051	546.22	533.157	520.095	507.034	493.972	322.773	316.717	326.697	287.375	289.586	285.35	273.59	801.012	793.441	785.872	769.917	753.966	738.013	722.06	298.604	281.204	290.318	284.056	269.218	247.33	243.817	142.546	135.311	138.573	134.467	133.244	121.723
	ROU	1565.75	1526.7	1526.76	1536.62	1491.63	1531.07	1440.33	1237.59	1412.94	1359.8	1349.11	1366.05	1485.87	1467.61	460.248	459.745	459.253	448.267	437.284	426.306	415.323	186.104	195.104	208.379	203.45	206.721	191.314	191.845	287.867	292.655	297.447	284.776	272.106	259.438	246.768	213.601	216.103	218.604	205.109	191.618	178.127	164.635	150.83	152.194	153.555	146.425	139.296	132.17
	SVK	257.329	250.828	237.24	239.1	232.983	242.284	227.142	292.939	295.493	279.911	267.529	247.889	242.128	206.63	73.0259	73.1731	76.3934	71.1132	69.698	69.4048	65.8746	31.6924	28.8575	28.6344	27.0262	26.9981	25.3168	25.1069	96.5671	100.033	103.672	98.774	96.346	94.8415	86.1945	37.3007	32.6336	47.0847	41.8881	35.1744	34.2459	33.8364	28.8807	28.5516	39.2169	34.1412	28.6239	28.4003
	SVN	118.103	115.615	115.291	116.238	116.402	110.704	108.36	173.651	158.747	152.359	139.454	136.709	136.413	124.635	41.0214	40.3606	38.0125	37.0967	35.6634	33.7573	31.6926	18.9328	17.5891	17.7478	17.9686	18.6805	17.7034	17.7947	49.627	48.3962	46.7942	46.1086	48.2325	53.0496	45.2596	18.7015	18.816	19.0641	18.7275	18.9841	17.095	16.3261	14.5613	14.3772	14.4949	14.3139	14.6106	13.9226
Other countries	ALB	105.491	103.922	102.357	104.357	106.364	108.37	110.375	123.637	152.361	149.764	157.156	144.013	146.394	146.394	29.3878	33.0824	33.913	33.9524	33.1438	33.3682	33.3682	28.4978	27.5074	27.472	25.7234	24.6168	23.8962	23.8962	19.1162	23.3526	22.991	22.1876	20.5572	21.7128	21.7128	17.5878	19.2248	17.9688	18.4928	18.1588	18.1628	18.1628	13.4748	15.0018	14.1858	14.4358	14.0928	14.1078
	ARM	129.185	134.604	140.964	146.864	147.892	154.043	0	31.8661	24.6802	19.3142	17.9649	16.8492	66.9283	0	101.276	100.125	98.9804	98.2308	97.5706	122.167	0	14.2516	16.5504	16.5858	17.7159	18.3077	19.3617	0	8.49989	8.72497	9.11389	9.03875	9.66123	19.046	0.004	2.01222	2.3106	2.13971	2.14111	1.93733	1.86942	0.002	1.44799	1.60413	1.48198	1.47518	1.33472	1.28527
	AZE	526.66	539.551	576.301	622.719	705.084	806.949	0	95.5804	88.8648	103.195	106.994	99.0165	125.669	0	176.628	176.959	210.142	254.344	294.434	315.032	0	61.5484	62.3111	64.373	65.5312	67.1756	68.8647	0	78.6846	79.644	94.4399	89.7766	74.3257	87.0526	0	7.9368	8.91484	8.84137	7.47651	7.04977	7.4113	0	5.40705	6.10225	6.07816	5.11509	4.79051	5.00114
	BIH	166.595	166.363	166.132	169.033	171.939	174.846	177.751	92.4234	95.7155	93.7951	92.847	90.0621	85.8662	93.7646	43.1156	41.8076	40.5032	39.594	38.6936	37.7936	36.8904	17.5931	17.8821	18.1711	18.2093	18.2475	18.2857	18.3239	35.6966	35.0737	34.4519	33.6078	32.7655	31.9235	31.0807	32.5623	34.1927	35.8231	34.504	33.185	31.866	30.5469	16.8113	17.7974	18.7834	18.2679	17.7523	17.2368
	BLR	607.633	600.939	594.248	601.448	608.656	615.864	623.07	457.789	468.119	480.276	484.861	496.364	531.204	486.744	205.934	203.9	201.867	202.553	203.243	203.938	204.628	115.956	116.499	117.049	121.138	125.233	129.332	133.426	173.119	170.33	167.546	165.131	162.719	160.307	157.894	70.9404	70.9427	70.9452	71.2184	71.4921	71.7642	72.0393	52.4599	52.755	53.0473	53.2068	53.3677	53.529
	GEO	203.329	206.186	210.148	215.603	221.587	224.199	0	179.817	168.726	168.831	165.263	174.866	157.401	0	83.8231	80.8828	81.576	80.2512	83.1443	76.9217	0	38.0548	38.3721	38.5016	38.9973	39.5786	40.1051	0	17.1305	16.8139	18.4679	18.8043	20.4193	16.7602	0	17.6031	17.6607	17.5552	16.99	17.5693	17.796	0	15.7162	15.6774	15.5378	15.1578	15.6427	15.8473
	ISL	21.0297	20.6251	20.5792	21.6269	22.3816	22.2521	21.9167	20.1529	21.0807	16.5398	17.5632	17.629	16.8781	16.8781	6.36789	6.78725	7.53344	5.5082	6.21921	5.32783	5.32783	2.6624	2.6354	2.61	2.645	2.68	2.7162	2.7516	9.49368	10.2866	9.58175	10.2884	10.4287	9.60326	9.60326	0.905676	0.897768	0.8909	1.17503	1.45915	1.74239	2.02665	0.648113	0.644671	0.64123	0.847937	1.05365	1.26039
	MDA	108.009	109.54	111.071	107.954	104.842	101.73	98.6166	208.475	188.243	183.872	173.271	152.759	96.52	148.254	28.9871	30.0597	31.1399	30.9205	30.7055	30.4883	30.2711	16.7898	16.6826	16.5766	16.2556	15.939	15.6226	15.3046	24.1235	24.8893	25.6579	24.9947	24.3347	23.6755	23.0147	14.8367	14.8393	14.841	14.6909	14.5418	14.3891	14.239	10.18	10.1942	10.2094	10.1084	10.0065	9.90498
	MKD	65.4783	64.8611	64.2523	65.4039	66.5655	67.7293	68.8883	66.1405	67.9869	63.4874	56.9135	52.5803	47.5577	48.5428	22.2089	21.5971	20.9897	20.8189	20.6569	20.4965	20.3321	9.17176	8.77936	8.38696	8.48676	8.58656	8.69116	8.79256	32.2655	31.9919	31.7235	32.1515	32.5867	33.0195	33.4515	21.9362	21.7513	21.5668	21.5733	21.5789	21.5857	21.5911	11.841	11.8221	11.8054	11.8896	11.973	12.0554
	RUS	14982	15056.6	15131.2	15306.3	15481.4	15656.5	15831.7	6263.16	6336.47	6197.28	6184.36	6099.62	6197.01	5951.34	3157.33	3149.28	3141.24	3070.38	2999.52	2928.67	2857.81	545.207	534.977	524.752	527.532	530.322	533.111	535.897	3039.2	3057.3	3075.4	2990.56	2905.73	2820.89	2736.05	1123.06	1139.21	1155.36	1156.89	1158.42	1159.96	1161.49	788.816	797.179	805.544	806.558	807.572	808.586
	TUR	2528.41	2409.67	2558.24	2617.45	2744.17	2694.89	2707.1	2682.72	2653.58	2645.4	2650.76	2649.85	2790.13	2631.92	698.987	679.615	660.244	658.875	657.506	656.137	654.768	419.059	417.436	415.821	420.598	425.385	430.171	434.955	749.507	740.862	732.218	743.185	754.151	765.119	776.086	467.34	469.832	472.327	478.765	485.204	491.644	498.082	348.254	351.272	354.29	357.02	359.747	362.476
	UKR	3976.36	3939.2	3902.05	3898.96	3895.89	3892.81	3889.73	3774.6	3419.51	3199.51	3024.58	2880.93	2668.68	3015.76	766.868	775.469	784.072	768.62	753.171	737.723	722.273	271.928	262.081	252.24	251.376	250.522	249.674	248.819	911.43	909.803	908.176	879.879	851.584	823.292	794.997	617.112	623.092	629.071	621.314	613.557	605.8	598.043	420.3	425.13	429.959	424.962	419.964	414.966
	YUG	340.344	330.746	321.152	322.123	323.099	324.079	325.055	467.269	570.513	464.728	456.462	458.068	421.849	476.892	142.176	148.401	154.626	151.184	147.745	144.306	140.866	64.3668	63.9794	63.5988	62.4012	61.2132	60.0252	58.834	154.892	160.494	166.097	159.958	153.82	147.681	141.542	112.764	110.93	109.096	105.488	101.879	98.2696	94.6605	64.7888	64.3968	64.0057	62.6649	61.3251	59.9853
Sea regions	ATL	0	0	0	0	0	0	0	77.7949	79.7001	81.654	83.7439	85.8354	87.9266	90.0183	26.5204	27.1759	27.8459	28.5698	29.2924	30.0163	30.7403	0	0	0	0	0	0	0	776.516	790.975	805.435	821.055	836.675	852.296	867.916	66.3423	67.9022	69.4619	71.2034	72.942	74.6821	76.4226	62.8546	64.3347	65.8146	67.455	69.0948	70.7347
	BAS	0	0	0	0	0	0	0	35.501	36.3476	37.2158	38.1272	39.0384	39.9495	40.8607	11.7204	12.0048	12.296	12.6107	12.925	13.2397	13.5542	0	0	0	0	0	0	0	301.799	307.339	312.879	318.879	324.879	330.879	336.879	25.8979	26.5177	27.1378	24.7891	22.5249	20.3448	18.1649	24.5309	25.1109	25.691	23.4707	21.3307	19.2706
	BLS	0	0	0	0	0	0	0	9.33223	9.55601	9.78537	10.0239	10.2622	10.5009	10.7391	3.15047	3.22726	3.3055	3.39047	3.47519	3.55986	3.64464	0	0	0	0	0	0	0	88.3522	89.9722	91.5921	93.3521	95.1121	96.8721	98.6322	7.58477	7.74471	7.90469	8.10488	8.30476	8.50487	8.70469	7.17459	7.33453	7.49451	7.6747	7.85458	8.03459
	MED	0	0	0	0	0	0	0	176.094	180.609	185.242	190.213	195.183	200.154	205.124	58.5367	60.0315	61.5655	63.2259	64.8848	66.5442	68.2036	0	0	0	0	0	0	0	1678.22	1710.96	1743.7	1779.4	1815.1	1850.8	1886.5	143.495	146.995	150.495	153.555	156.615	159.675	162.736	135.876	139.196	142.516	145.416	148.316	151.216
	NOS	0	0	0	0	0	0	0	77.6983	79.524	81.3963	83.3623	85.3283	87.2943	89.2603	25.8482	26.4703	27.1076	27.796	28.4841	29.1724	29.8607	0	0	0	0	0	0	0	716.912	730.072	743.232	757.512	771.792	786.072	800.352	61.6526	63.0726	64.4925	59.3725	54.1876	48.3526	42.7832	58.1548	59.4949	60.8347	55.9947	51.0977	45.6312
[truncated: 8 more columns]

## Sheet: Emissions_overview_detail
This sheet shows detailed emissions by sector, for each pollutant, each country and each year (2003-2009). Sea regions are excluded in this sheet (see summary sheet). All values are in kton.
			CH4	CH4	CH4	CH4	CH4	CH4	CH4	CO	CO	CO	CO	CO	CO	CO	NMVOC	NMVOC	NMVOC	NMVOC	NMVOC	NMVOC	NMVOC	NH3	NH3	NH3	NH3	NH3	NH3	NH3	NOX	NOX	NOX	NOX	NOX	NOX	NOX	PM10	PM10	PM10	PM10	PM10	PM10	PM10	PM2_5	PM2_5	PM2_5	PM2_5	PM2_5
			CH4							CO							NMVOC							NH3							NOX							PM10							PM2.5
ISO3	Sector	SectorName	2003	2004	2005	2006	2007	2008	2009	2003	2004	2005	2006	2007	2008	2009	2003	2004	2005	2006	2007	2008	2009	2003	2004	2005	2006	2007	2008	2009	2003	2004	2005	2006	2007	2008	2009	2003	2004	2005	2006	2007	2008	2009	2003	2004	2005	2006	2007
AUT	1.1	Power plants	0.2241	0.25275	0.23737	0.27596	0.28086	0.29731	0.32089	2.94081	2.55449	3.0439	3.91925	3.5658	4.04858	4.22378	0.546483	0.546699	0.575068	0.680536	0.681947	0.727505	0.753065	0.183947	0.194009	0.235919	0.2415	0.263655	0.30558	0.319928	9.69303	9.75826	10.4697	10.4581	10.1982	10.6067	9.5972	0.795758	0.848807	0.823176	0.933968	1.00687	1.07034	1.0904	0.668252	0.713064	0.6932	0.784472	0.844371
AUT	1.2	Refineries	0	0	0	0	0	0	0	0.871	0.869	0.423	0.462	0.385	0.389	0.497	1.141	1.059	0.939	0.946	0.959	0.84	0.812	0.0766465	0.0829661	0.0827031	0.0940166	0.0959996	0.0893374	0.095479	3.344	3.437	3.051	3.389	3.051	1.203	1.046	0.0995159	0.107949	0.0937384	0.0937384	0.0925	0.0925	0.0925	0.0838029	0.090904	0.0789376	0.0789376	0.0778947
AUT	2.1	Residential combustion (including commercial/institutional)	10.6217	10.0699	10.868	9.4966	9.03642	9.18765	9.027	279.792	264.337	288.649	262.207	246.273	251.295	247.098	30.347	28.7847	31.0609	27.1943	25.8443	26.2952	25.8566	0.66825	0.634329	0.680183	0.64377	0.590561	0.626019	0.592978	16.3116	15.2702	15.5634	14.8924	13.3364	13.7074	12.8557	7.65518	7.41479	7.85799	7.21915	7.10073	7.21938	7.0837	6.9078	6.69412	7.08807	6.52022	6.41496
AUT	2.2	Agricultural stationary combustion	0.77739	0.74548	0.81784	0.64455	0.64751	0.65008	0.63403	18.0933	17.2877	19.1984	15.9488	15.6618	15.8543	15.5583	1.99658	1.91019	2.11545	1.65571	1.65358	1.66514	1.62872	0.036022	0.0375115	0.0403908	0.0381324	0.0399788	0.0414486	0.0404194	0.92889	0.95247	0.951919	0.894496	0.914537	0.945996	0.901853	0.441154	0.45412	0.524674	0.46951	0.530558	0.511989	0.484464	0.392137	0.403662	0.466377	0.417343	0.471607
AUT	34.1	Iron and steel industry (including coke ovens)	0.09192	0.10433	0.1188	0.13018	0.11974	0.10833	0.10977	149.313	155.471	140.591	150.47	141.494	127.326	118.733	0.479237	0.536928	0.579319	0.622227	0.626945	0.596531	0.483205	0.0451578	0.0527317	0.058241	0.0596663	0.0598268	0.0561251	0.0473606	5.83475	5.92931	6.62609	7.08181	6.73151	6.6087	6.01518	1.96199	1.86017	1.7424	1.14466	0.671727	0.866073	0.871334	0.917105	0.876962	0.843166	0.593797	0.37849
AUT	34.2	Non-ferrous metal industry	0.00527	0.00517	0.00536	0.00557	0.00643	0.00652	0.00697	0.350677	0.358689	0.358775	0.356301	0.360857	0.361526	0.338252	0.171201	0.180532	0.176693	0.180244	0.184798	0.187	0.147757	0.00408914	0.00400951	0.00407425	0.00416396	0.00460655	0.00465224	0.00477013	0.229612	0.221478	0.218574	0.224384	0.249155	0.251818	0.251766	0.0120528	0.00889109	0.00857809	0.00986181	0.0118206	0.0119015	0.010674	0.010044	0.00740924	0.00714841	0.00821818	0.00985052
AUT	34.3	Chemical industry	0.80345	0.82291	0.85668	1.00716	0.97508	0.96651	0.91592	12.8672	13.125	12.726	12.4672	12.1763	12.2945	12.1539	1.55198	1.6519	1.5822	1.53817	1.48036	1.5105	1.48672	0.100822	0.0815549	0.0964115	0.0990414	0.104758	0.109735	0.113774	2.19258	2.03163	2.13157	1.75864	1.589	1.72718	1.51484	0.778393	0.82384	0.718634	0.658894	0.553523	0.622318	0.533233	0.564473	0.601069	0.517027	0.463459	0.391295
AUT	34.4	Paper and pulp industry	0.13453	0.13395	0.15163	0.14386	0.14213	0.14285	0.14267	2.09201	2.17224	2.96669	2.95089	2.84214	2.6373	2.76097	0.635906	0.682172	1.05926	1.1797	1.16543	1.01414	0.886333	0.0677774	0.0614482	0.0851284	0.0692441	0.0747895	0.071813	0.0752834	5.37458	5.31615	6.67677	6.43458	6.40657	6.11959	5.98729	0.2871	0.2979	0.310704	0.247632	0.256694	0.194144	0.206014	0.23606	0.24494	0.255485	0.203613	0.211073
AUT	34.5	Cement industry	0	0	0	0	0	0	0	0	0	0	0	0	0	0	0	0	0	0	0	0	0	0	0	0	0	0	0	0	0	0	0	0	0	0	0	0.0607224	0.0638452	0.074461	0.08877	0.0922572	0.0800655	0.0711128	0.0539755	0.0567513	0.0661875	0.0789066	0.0820064
AUT	34.6	Other non-metallic minerals industry	0	0	0	0	0	0	0	9.78341	9.78341	9.78341	9.78341	9.78341	9.78341	9.78341	0	0	0	0	0	0	0	0	0	0	0	0	0	0	0	0	0	0	0	0	0	6.17936	6.57361	6.36937	6.22708	6.37495	6.79727	6.31729	0.729689	0.768806	0.749433	0.735285	0.751978
AUT	34.7	Storage and handling in industry	0	0	0	0	0	0	0	0	0	0	0	0	0	0	0	0	0	0	0	0	0	0	0	0	0	0	0	0	0	0	0	0	0	0	0	0	0	0	0	0	0	0	0	0	0	0	0
AUT	34.8	Other industries	0.19521	0.21523	0.23932	0.26641	0.29254	0.32697	0.31227	9.07785	9.15388	9.18348	14.1442	16.4149	19.8753	18.4735	2.49042	2.53403	2.58024	2.65699	2.71157	2.8827	2.86977	0.219237	0.245592	0.267717	0.272651	0.357435	0.32694	0.241948	12.7647	13.0088	13.0624	13.6281	14.2691	13.8683	12.0966	1.46117	1.46793	1.87252	2.1495	2.53788	2.76055	2.65648	0.849829	0.835188	1.07481	1.22742	1.51367
AUT	5.1	Coal production	0.24661	0.05037	0.00132	0.00143	0	0	0	0	0	0	0	0	0	0	0	0	0	0	0	0	0	0	0	0	0	0	0	0	0	0	0	0	0	0	0	0.302259	0.283459	0.28823	0.279189	0.251934	0.240686	0.185288	0.0946028	0.0888892	0.0903905	0.0877963	0.0795269
AUT	5.2	Oil production	8.83643	9.58903	9.78367	10.1661	10.4851	10.5688	11.231	0	0	0	0	0	0	0	0.943	0.927	0.911	0.912	0.524	0.443	0.501	0	0	0	0	0	0	0	0	0	0	0	0	0	0	0	0	0	0	0	0	0	0	0	0	0	0
AUT	5.3	Gas production	3.56945	3.90686	4.02252	4.23572	4.42296	4.5178	4.85622	0.0668649	0.0660421	0.0659427	0.0859743	0.0814553	0.103673	0.0770737	0.0238205	0.0227655	0.0228197	0.0238432	0.0235349	0.0245182	0.0230457	0.00668649	0.00660421	0.00659427	0.00859743	0.00814553	0.0103673	0.00770737	1.00297	0.990632	0.98914	1.28962	1.22183	1.5551	1.15611	0.00300892	0.0029719	0.00296742	0.00386885	0.00366549	0.0046653	0.00346832	0.00250743	0.00247658	0.00247285	0.00322404	0.00305457
AUT	5.4	Gasoline distribution	0	0	0	0	0	0	0	0	0	0	0	0	0	0	1.118	1.035	0.9868	1.003	0.99	0.946	0.775	0	0	0	0	0	0	0	0	0	0	0	0	0	0	0	0	0	0	0	0	0	0	0	0	0	0
AUT	5.5	Flaring	0	0	0	0	0	0	0	0	0	0	0	0	0	0	0	0	0	0	0	0	0	0	0	0	0	0	0	0	0	0	0	0	0	0	0	0	0	0	0	0	0	0	0	0	0	0	0
AUT	6.1	Solvent and other product use	0	0	0	0	0	0	0	0	0	0	0	0	0	0	93.5358	79.5312	89.313	105.041	95.7062	88.2118	64.1009	0	0	0	0	0	0	0	0	0	0	0	0	0	0	0.430267	0.43298	0.43594	0.438201	0.439951	0.441837	0.443241	0.430267	0.43298	0.43594	0.438201	0.439951
AUT	7.1	Road transport, light duty vehicles	1.05066	0.9241	0.804927	0.695046	0.611005	0.511594	0.459558	295.064	267.195	239.376	206.885	180.383	147.901	131.806	19.6047	16.8376	14.6814	12.0318	10.199	8.4053	7.1775	3.90007	3.4068	2.9163	2.40486	2.01207	1.57324	1.33927	48.6136	49.8035	50.3737	49.1737	48.3914	44.9479	42.9486	2.69971	2.68465	2.67827	2.57745	2.4688	2.21432	1.99432	2.69971	2.68465	2.67827	2.57745	2.4688
AUT	7.2	Road transport, heavy duty vehicles	0.371776	0.34834	0.323191	0.26764	0.224122	0.176223	0.145844	18.0616	18.2424	18.438	15.938	14.9287	13.3175	12.3311	2.3112	2.3356	2.3141	2.3288	2.2897	2.1434	1.9539	0.067438	0.0677084	0.0674566	0.0603401	0.0582127	0.0537241	0.0512488	100.485	98.0781	98.3904	84.9224	81.8296	74.3311	65.0893	2.45752	2.35455	2.32787	1.89453	1.6516	1.36941	1.17738	2.45752	2.35455	2.32787	1.89453	1.6516
AUT	7.3	Road transport, mopeds and motorcycles	0.206116	0.18846	0.170742	0.156124	0.146223	0.131393	0.127787	21.311	21.447	21.597	21.63	21.724	21.847	21.921	1.931	1.8965	1.8736	1.8504	1.8305	1.815	1.787	0.0011	0.0011	0.0011	0.0011	0.0012	0.0012	0.0012	0.409	0.42	0.432	0.439	0.446	0.455	0.464	0	0	0	0	0	0	0	0	0	0	0	0
AUT	7.4	Road transport, gasoline evaporation	0	0	0	0	0	0	0	0	0	0	0	0	0	0	3.75624	3.27045	2.92058	2.66396	2.45529	2.32859	2.17704	0	0	0	0	0	0	0	0	0	0	0	0	0	0	0	0	0	0	0	0	0	0	0	0	0	0
AUT	7.5	Road transport, wear	0	0	0	0	0	0	0	0	0	0	0	0	0	0	0	0	0	0	0	0	0	0	0	0	0	0	0	0	0	0	0	0	0	0	0	3.19227	3.26519	3.32091	3.38798	3.44477	3.43721	3.31232	0.957682	0.979558	0.996272	1.01639	1.03343
AUT	8.1	Air transport (<1000m)	0.004	0.0043	0.00409	0.00487	0.00498	0.00553	0.00508	3.27311	3.35636	3.46564	3.73734	3.89084	4.00232	4.12152	0.440985	0.506063	0.484442	0.490448	0.522221	0.53342	0.499467	0.0007236	0.000824158	0.000795908	0.000803193	0.000854162	0.000860024	0.000806845	1.23307	1.44974	1.29267	1.27867	1.38019	1.3772	1.28612	0.102577	0.119479	0.113157	0.113927	0.122084	0.122622	0.112587	0.102577	0.119479	0.113157	0.113927	0.122084
AUT	8.2	Rail transport	0.0063	0.00611	0.00701	0.00723	0.00682	0.00708	0.00615	1.4803	1.44126	1.65815	1.71216	1.61781	1.6828	1.46548	0.256127	0.24831	0.285187	0.293976	0.277281	0.287868	0.250201	0.000475384	0.000452663	0.000520299	0.000540648	0.000511555	0.000532716	0.000464473	1.59537	1.58669	1.84157	1.9164	1.81726	1.89765	1.65918	0.788161	0.777794	0.813931	0.820882	0.801539	0.809923	0.769641	0.425211	0.414844	0.450981	0.457932	0.438589
AUT	8.3	Navigation, non-international	0	0	0	0	0	0	0	0.107052	0.108553	0.107279	0.104719	0.104629	0.103316	0.102723	0.164233	0.164676	0.162	0.158157	0.156627	0.153968	0.151993	0.000850204	0.00103021	0.001	0.000870731	0.000915988	0.000867648	0.000869185	0.874034	1.06265	1.034	0.902814	0.950867	0.901969	0.904803	0.0613714	0.0732818	0.0701	0.0599883	0.0623866	0.0582752	0.0576067	0.0583029	0.0696178	0.066595	0.0569889	0.0592673
AUT	8.4	Mobile machinery, agriculture	0	0	0	0	0	0	0	16.9096	16.4518	16.4577	16.704	16.8545	16.7051	16.1223	3.69784	3.57887	3.55805	3.75414	3.90067	3.88701	3.71906	0.00413	0.00417	0.00432	0.00422	0.00415	0.00406	0.0039	9.40498	9.50295	9.87346	9.67875	9.47051	9.30839	8.93557	1.80957	1.77616	1.79479	1.72677	1.67028	1.61616	1.49677	1.6648	1.62695	1.63593	1.56655	1.50176
AUT	8.5	Mobile machinery, industry	0	0	0	0	0	0	0	4.46411	4.44674	5.16514	5.75996	5.86808	6.14322	6.01086	0.67072	0.68417	0.80628	0.89902	0.91297	0.95889	0.93976	0.00185	0.00187	0.00235	0.00272	0.00273	0.00282	0.00278	6.67496	6.48728	7.64255	8.66694	8.50239	8.60397	8.42731	0.60974	0.56572	0.59818	0.60132	0.56924	0.55326	0.51758	0.60974	0.56572	0.59818	0.60132	0.56924
AUT	8.6	Other mobile sources	0.0014	0.00141	0.00142	0.00143	0.00144	0.00146	0.00148	18.3318	18.1212	17.9256	17.7393	17.5647	17.42	17.2772	3.60711	3.50599	3.20657	2.90674	2.60267	2.29812	2.00505	0.000337457	0.000328674	0.000319895	0.000321109	0.000292323	0.000293538	0.000274753	0.963675	0.891381	0.872086	0.852272	0.784797	0.755523	0.723628	0.0807263	0.0732779	0.068594	0.064241	0.0602756	0.056591	0.0530973	0.0802992	0.0728522	0.0681669	0.0638109	0.0598443
AUT	9.1	Landfills	103.616	96.84	91.0024	86.6261	81.1634	75.0549	69.4312	7.25655	6.78581	6.37953	6.07514	5.69306	5.26431	4.87552	0.0961114	0.0898765	0.0844954	0.0804638	0.0754033	0.0697246	0.0645752	0.00320371	0.00299588	0.00281651	0.00268213	0.00251344	0.00232415	0.00215251	0	0	0	0	0	0	0	0.0612569	0.0799384	0.0894315	0.0879728	0.102045	0.0845888	0.0845888	0.0192788	0.0251583	0.0281459	0.0276869	0.0321157
AUT	9.2	Controlled waste incineration	0.00032	0.00032	0.00032	0.00032	0.00032	0.00032	0.00032	0.0044175	0.0044175	0.0044175	0.0044175	0.0044175	0.0044175	0.0044175	0.002232	0.002232	0.002232	0.002232	0.002232	0.002232	0.002232	0.00033062	0.00033062	0.00033062	0.00033062	0.00033062	0.00033062	0.00033062	0.04588	0.04588	0.04588	0.04588	0.04588	0.04588	0.04588	0	0	0	0	0	0	0	0	0	0	0	0
AUT	9.3	Other waste treatment	3.68525	3.95562	3.97398	3.92661	3.91408	3.84509	3.91365	0.00594174	0.007955	0.008514	0.008514	0.008514	0.008514	0.008514	0.000442176	0.000592	0.0006336	0.0006336	0.0006336	0.0006336	0.0006336	0.881098	1.16472	1.28832	1.35174	1.39698	1.40833	1.4384	0.0041454	0.00555	0.00594	0.00594	0.00594	0.00594	0.00594	0	0	0	0	0	0	0	0	0	0	0	0
AUT	10.1	Livestock, Cattle	156.521	156.602	154.45	154.012	154.01	154.127	156.047	0	0	0	0	0	0	0	0	0	0	0	0	0	0	34.2941	34.5134	34.1304	34.2971	34.6011	34.9094	35.4288	3.43205	3.44209	3.39135	3.39198	3.40163	3.41594	3.46299	0	0	0	0	0	0	0	0	0	0	0	0
AUT	10.2	Livestock, Poultry	1.56158	1.55734	1.5535	1.55006	1.54701	1.54435	1.54964	0	0	0	0	0	0	0	0	0	0	0	0	0	0	5.19008	5.19008	5.19008	5.19008	5.19008	5.19008	5.19008	0.151533	0.151464	0.151394	0.151323	0.151251	0.151178	0.151156	0	0	0	0	0	0	0	0	0	0	0	0
AUT	10.3	Livestock, Sheep	2.6658	2.67946	2.66771	2.55835	2.87738	2.72875	2.82316	0	0	0	0	0	0	0	0	0	0	0	0	0	0	0.149728	0.150495	0.149835	0.143693	0.161611	0.153263	0.158566	0.0681475	0.0684968	0.0681963	0.0654007	0.0735563	0.0697567	0.0721703	0	0	0	0	0	0	0	0	0	0	0	0
AUT	10.4	Livestock, Goats	0.27959	0.28428	0.28211	0.27191	0.3097	0.31995	0.34912	0	0	0	0	0	0	0	0	0	0	0	0	0	0	0.0251192	0.0255406	0.025346	0.0244297	0.027824	0.0287454	0.0313665	0.0107295	0.0109095	0.0108264	0.010435	0.0118848	0.0122784	0.013398	0	0	0	0	0	0	0	0	0	0	0	0
AUT	10.5	Livestock, Pigs	9.0722	8.58865	8.67165	8.5006	8.79957	8.11958	8.30318	0	0	0	0	0	0	0	0	0	0	0	0	0	0	12.0252	11.3986	11.6714	11.525	12.0001	11.1889	11.379	0.876139	0.829444	0.848381	0.836467	0.870079	0.810177	0.82404	0	0	0	0	0	0	0	0	0	0	0	0
AUT	10.6	Livestock, Other animals	1.679	1.67807	1.67723	1.67648	1.67582	1.67524	1.67639	0	0	0	0	0	0	0	0	0	0	0	0	0	0	0.463015	0.463015	0.463015	0.463015	0.463015	0.463015	0.463015	0.120723	0.120743	0.120761	0.120777	0.120791	0.120804	0.120779	0	0	0	0	0	0	0	0	0	0	0	0
AUT	10.7	Crops and pastures	0	0	0	0	0	0	0	0	0	0	0	0	0	0	0	0	0	0	0	0	0	4.6732	4.55679	4.68161	4.99322	5.35241	5.54642	5.90055	0	0	0	0	0	0	0	0	0	0	0	0	0	0	0	0	0	0	0
AUT	10.8	Agricultural waste burning	0.093	0.093	0.093	0.083	0.073	0.063	0.053	0.000522519	0.000650265	0.0006	0.000542345	0.000556559	0.000556559	0.000562111	0.1204	0.1202	0.12	0.0984	0.0768	0.0552	0.0336	0.0136	0.0118	0.01	0.008	0.006	0.004	0.002	0.0012	0	0	0	0	0	0	0.101454	0.101452	0.10145	0.08116	0.06087	0.04058	0.02029	0.0900228	0.0900214	0.09002	0.072016	0.054012
AUT	10.9	Rice cultivation	0	0	0	0	0	0	0	0	0	0	0	0	0	0	0	0	0	0	0	0	0	0	0	0	0	0	0	0	0	0	0	0	0	0	0	0	0	0	0	0	0	0	0	0	0	0	0
AUT	10.10	Storage and handling of agricultural products	0.40754	0.36771	0.36963	0.40943	0.42341	0.40875	0.41601	0	0	0	0	0	0	0	0	0	0	0	0	0	0	0	0	0	0	0	0	0	0	0	0	0	0	0	0	0.0236398	0.0232256	0.0245786	0.0254543	0.0267366	0.0269328	0.0287564	0.00745471	0.00732429	0.00775073	0.0080267	0.00843075
AUT	10.11	Other agriculture	0	0	0	0	0	0	0	0	0	0	0	0	0	0	1.60729	1.82295	1.74766	1.67455	1.67956	1.84185	1.72644	0.520406	0.500554	0.514239	0.559845	0.564006	0.536195	0.543627	0.0502142	0.0453077	0.0455435	0.0504479	0.0521706	0.0503639	0.0512584	5.51182	5.50417	5.42683	5.41571	5.36534	5.341	5.34841	1.22485	1.22315	1.20596	1.20349	1.1923
BEL	1.1	Power plants	0.53946	0.57754	0.64881	0.68744	0.7781	0.8189	0.7423	3.44265	4.44857	5.87933	5.71052	5.62848	3.55022	2.97459	0.927181	0.882495	0.472944	0.47613	0.500609	0.502595	0.534555	0.0333867	0.0379521	0.0479013	0.0633805	0.0897896	0.0992627	0.0799569	34.5352	36.1085	34.4977	28.2896	25.4604	17.4277	17.1785	1.64851	1.66481	1.16071	0.860641	0.690444	0.506582	0.462031	0.677524	0.775003	0.557748	0.406501	0.433204
BEL	1.2	Refineries	0	0	0	0	0	0	0	7.47368	3.46193	4.25844	6.26603	7.45506	3.74491	4.01753	9.50852	8.7134	7.25461	5.64012	4.23083	4.2938	4.05892	0.00091	0.001053	0.001513	0.001467	0.002	0.002	0.001384	6.526	6.87074	5.74884	5.75502	5.57987	4.69342	4.04632	1.5089	1.4434	0.7826	0.7487	0.8129	0.3793	0.2361	1.0255	0.9499	0.5772	0.5538	0.617
BEL	2.1	Residential combustion (including commercial/institutional)	7.75448	7.85142	7.84501	7.84929	7.42067	7.83619	7.75804	73.6124	72.9397	77.7799	82.7131	79.5225	81.1294	80.5311	7.12397	7.14588	7.0526	7.26813	6.8628	7.35119	7.13217	0.08115	0.08183	0.08207	0.08565	0.08135	0.08917	0.08825	24.0629	23.4092	22.993	21.7938	20.0511	22.2397	21.8034	2.37469	2.30828	2.27664	2.24083	2.05914	2.28971	2.2304	2.22262	2.15304	2.13048	2.08462	1.91233
BEL	2.2	Agricultural stationary combustion	0.50861	0.51533	0.51355	0.51003	0.8241	0.68855	0.74044	0.29545	0.30982	1.60976	1.59333	3.78662	4.65766	6.54492	0.235107	0.26462	0.249001	0.247791	0.541779	0.674929	0.892412	4e-05	4e-05	4e-05	4e-05	4e-05	4e-05	4e-05	2.11024	2.25317	2.24767	2.20819	2.23987	2.43943	3.13859	0.53564	0.53521	0.53523	0.53522	0.41721	0.25022	0.26723	0.43054	0.43021	0.43023	0.43022	0.34421
BEL	34.1	Iron and steel industry (including coke ovens)	1.74182	2.04716	3.22682	3.89643	4.10286	3.5148	1.24817	412.02	425.002	381.501	372.799	329.76	332.64	126.716	4.57668	5.11625	5.26566	4.7037	3.98936	3.72676	1.93469	0.20868	0.22242	0.23253	0.21829	0.19434	0.12639	0.08414	21.6946	22.0786	18.6687	18.3441	15.8629	14.8301	6.60298	8.85648	8.8766	7.61526	7.66187	5.55907	5.61679	1.50856	6.27826	6.30825	5.38431	5.52035	4.03078
BEL	34.2	Non-ferrous metal industry	0.04096	0.04094	0.03948	0.04255	0.04044	0.03712	0.0354	25.4987	30.3316	29.681	29.4306	24.3052	24.6179	16.9224	0.68023	0.722141	0.670841	0.789899	0.571794	0.386784	0.138651	0.00071	0.00094	0.00066	0.00105	0.00146	0.13455	0.00049	1.53845	1.58637	1.47798	1.39506	1.26482	1.08208	0.920087	0.15657	0.16215	0.1657	0.17118	0.17169	0.12025	0.09787	0.11748	0.11896	0.1251	0.12056	0.1199
BEL	34.3	Chemical industry	0.56545	0.6127	0.61112	0.52578	0.52891	0.52322	0.48439	22.2232	8.20485	4.56607	3.72954	4.02662	2.63004	2.73286	15.5374	16.0074	15.8984	16.3765	15.8261	15.0912	14.3389	0.702231	0.819243	0.699395	0.758447	0.93918	0.768193	0.553451	11.7689	11.6681	12.2896	11.9011	11.7857	10.5579	9.06785	0.94229	0.98337	0.91118	0.75645	0.71442	0.655	0.59236	0.68482	0.72006	0.64794	0.54867	0.50629
BEL	34.4	Paper and pulp industry	0.18133	0.22037	0.21843	0.23532	0.23694	0.22208	0.21905	1.35158	1.70877	1.54401	1.56914	1.49084	1.37563	1.38726	0.936091	0.974603	0.986903	0.994963	0.97352	0.957811	0.928816	0.00971	0.01315	0.01443	0.01475	0.01857	0.0177	0.01717	1.96813	2.05147	1.56932	1.61273	1.61927	1.49013	1.34252	0.16372	0.22072	0.18937	0.19388	0.21644	0.10619	0.10601	0.12714	0.16864	0.14096	0.18906	0.21392
BEL	34.5	Cement industry	0	0	0	0	0	0	0	7.60473	6.36387	7.22568	8.9928	8.99694	8.76986	7.59308	0.2166	0.33786	0.31164	0.3607	0.39206	0.44643	0.44169	0	0	0	0	0	0	0	12.9135	14.1324	14.2859	12.9435	13.6971	11.4138	9.62741	1.22948	0.49062	0.33283	0.32246	0.14381	0.13672	0.06051	0.42947	0.16943	0.12556	0.11401	0.06202
BEL	34.6	Other non-metallic minerals industry	0	0	0	0	0	0	0	36.6076	17.3834	36.5023	33.6048	17.195	25.6053	19.208	0.9787	0.46084	0.97966	0.98436	0.90859	0.45442	0.2672	0	0	0	0	0	0	0	2.69739	6.41553	6.07786	3.31706	3.47529	2.21198	1.57326	3.18611	3.07637	2.37203	2.35791	2.36915	2.46403	2.80569	1.02646	0.94237	0.82183	0.8216	0.8298
BEL	34.7	Storage and handling in industry	0	0	0	0	0	0	0	0.0152697	0.0152697	0.0152697	0.0152697	0.0152697	0.0152697	0.0152697	1.36306	1.42461	1.30058	1.14004	0.92359	0.843609	0.780116	0	0	0	0	0	0	0	0.0042756	0.0042756	0.0042756	0.0042756	0.0042756	0.0042756	0.0042756	1.0142	0.8485	0.659224	0.687824	0.692624	0.613024	0.0250239	0.9463	0.7821	0.5889	0.6067	0.6085
BEL	34.8	Other industries	1.18745	1.31435	1.15089	1.50917	1.23252	1.71237	1.50053	9.60266	10.1061	9.53194	9.73385	9.28144	10.3724	9.51281	4.45298	3.86578	3.8752	4.2839	4.14121	4.23558	3.95442	0.650447	0.733613	0.811556	0.996774	0.932688	0.911631	0.835346	18.6535	19.2923	18.1381	18.6758	18.5978	16.1592	13.0856	3.49662	3.145	2.58572	2.53052	2.43238	2.09567	1.79336	3.17388	2.84298	2.2688	2.22557	2.17424
BEL	5.1	Coal production	0.53222	0.57129	0.55517	0.56542	0.49888	0.29655	0.1909	0	0	0	0	0	0	0	0	0	0	0	0	0	0	0	0	0	0	0	0	0	0	0	0	0	0	0	0	0	0	0	0	0	0	0	0	0	0	0	0
BEL	5.2	Oil production	0	0	0	0	0	0	0	0	0	0	0	0	0	0	0.9979	0.4737	0.4744	0.422361	0.486121	0.472526	0.437633	0	0	0	0	0	0	0	0	0	0	0	0	0	0	0	0	0	0	0	0	0	0	0	0	0	0
BEL	5.3	Gas production	19.6351	19.3844	20.1085	19.966	19.8123	18.5924	18.6983	0	0	0	0	0	0	0	3.20204	3.13964	3.31951	3.39118	3.43216	3.30089	3.39753	0	0	0	0	0	0	0	0	0	0	0	0	0	0	0	0	0	0	0	0	0	0	0	0	0	0
BEL	5.4	Gasoline distribution	0	0	0	0	0	0	0	0	0	0	0	0	0	0	5.11331	4.70452	3.26684	2.73981	2.44329	2.31523	2.25038	0	0	0	0	0	0	0	0	0	0	0	0	0	0	0	0	0	0	0	0	0	0	0	0	0	0
BEL	5.5	Flaring	0	0	0	0	0	0	0	0	0	0	0	0	0	0	0.038	0	0	0	0	0	0	0	0	0	0	0	0	0	0	0	0	0	0	0	0	0	0	0	0	0	0	0	0	0	0	0	0
BEL	6.1	Solvent and other product use	0	0	0	0	0	0	0	0	0	0	0	0	0	0	65.3044	60.3373	62.3828	61.6679	59.534	56.8276	51.9804	0	0	0	0	0	0	0	0	0	0	0	0	0	0	0	0	0	0	0	0	0	0	0	0	0	0
BEL	7.1	Road transport, light duty vehicles	1.90813	1.69372	1.4705	1.32986	0.628291	0.508945	0.441381	292.334	259.022	164.554	142.311	57.303	47.252	44.291	25.9373	22.1206	18.6422	15.4463	7.15748	4.38305	4.04654	2.1579	2.08735	1.87993	1.76508	1.32813	1.23083	1.15526	71.7187	68.7105	65.435	61.4382	57.6002	54.4353	53.5123	4.53512	4.38412	4.63584	4.4682	3.20162	2.88509	2.78634	4.53512	4.38412	4.60543	4.43749	3.17063
BEL	7.2	Road transport, heavy duty vehicles	0.556309	0.554926	0.556072	0.485463	0.220034	0.169614	0.138476	21.5826	21.4936	17.0389	15.5355	13.1995	11.4684	9.48128	4.67197	4.50386	4.32582	3.8403	2.18907	1.8441	1.52061	0.0281379	0.0283988	0.0282312	0.0268804	0.026565	0.0270115	0.0238842	63.5105	61.887	60.0309	55.1173	60.7791	57.2632	49.106	2.87332	2.79769	1.94221	1.70086	1.25893	1.08364	0.899835	2.87332	2.79769	1.93972	1.69566	1.25366
BEL	7.3	Road transport, mopeds and motorcycles	0.339101	0.352552	0.370715	0.343978	0.167895	0.140671	0.126662	24.8215	24.1937	22.4328	22.9976	13.6065	12.6738	12.1108	7.57187	7.36995	7.0626	6.84887	5.2321	4.8701	4.52714	0.00183449	0.00188895	0.00188922	0.00200014	0.00202078	0.00206762	0.00208425	0.250084	0.262702	0.274077	0.296064	0.338958	0.343157	0.34584	0.017546	0.016275	0.0551036	0.052395	0.0618145	0.0584252	0.0556801	0.017546	0.016275	0.0549758	0.0522652	0.0616827
BEL	7.4	Road transport, gasoline evaporation	0	0	0	0	0	0	0	0	0	0	0	0	0	0	6.25011	5.25181	4.45592	3.57554	0.517574	0.420363	0.421254	0	0	0	0	0	0	0	0	0	0	0	0	0	0	0	0	0	0	0	0	0	0	0	0	0	0
BEL	7.5	Road transport, wear	0	0	0	0	0	0	0	0	0	0	0	0	0	0	0	0	0	0	0	0	0	0	0	0	0	0	0	0	0	0	0	0	0	0	0	2.0883	2.12219	2.40659	2.35912	2.52064	2.53307	2.45017	0.78423	0.79708	1.16832	1.1507	1.19502
BEL	8.1	Air transport (<1000m)	0.00155	0.00162	0.0015	0.00167	0.0016	0.00163	0.00188	2.71752	2.66791	3.29255	3.38364	3.48663	3.51701	3.35281	0.55961	0.524722	0.627717	0.628024	0.640333	0.597634	0.519814	0	0	0	0	0	0	0	1.58001	1.60904	2.38657	2.46684	2.63483	2.97468	2.81329	0.08545	0.08118	0.07977	0.08095	0.08168	0.08361	0.08014	0.04315	0.04098	0.04067	0.04135	0.04178
BEL	8.2	Rail transport	0.00809	0.00792	0.00825	0.00905	0.00894	0.00825	0.00611	0.875901	0.746623	0.575361	0.590693	0.557259	0.488445	0.338855	0.196195	0.177037	0.153663	0.165102	0.160524	0.143358	0.107486	0.000220821	0.000219275	0.000236881	0.000235342	0.000380053	0.000348756	0.000158756	2.18052	2.04369	2.1838	2.39134	2.34147	2.12926	1.54104	0.458587	0.450235	0.440428	0.457476	0.456179	0.446877	0.409347	0.32351	0.315577	0.307139	0.321046	0.319459
BEL	8.3	Navigation, non-international	0	0	0	0	0	0	0	6.73623	6.8842	6.66611	5.5476	5.78921	5.67941	4.86431	0.410647	0.421119	0.408	0.302462	0.311114	0.301816	0.254825	0	0	0	0	0	0	0	10.5033	10.7292	10.574	9.1735	9.63479	9.47503	8.02986	1.9945	2.03744	1.972	1.46554	1.50204	1.45235	1.23959	1.07139	1.09743	1.065	0.792283	0.813253
BEL	8.4	Mobile machinery, agriculture	0	0	0	0	0	0	0	2.98776	3.01863	3.79298	3.77398	3.61793	3.67134	3.46181	1.36593	1.37976	1.55009	1.53957	1.39875	1.43796	1.40329	0.00083	0.00082	0.000828	0.000818	0.001328	0.001368	0.000698	7.87606	7.98303	6.55973	6.50041	5.81226	6.0162	6.03181	4.52764	4.561	1.95785	1.93894	1.67722	1.75114	1.75377	1.8186	1.82329	1.87474	1.85579	1.59626
BEL	8.5	Mobile machinery, industry	0	0	0	0	0	0	0	0	0	0.094	0.093	0.093	0.09	0.084	0	0	0.0425743	0.0427677	0.0430889	0.0423382	0.0399245	0	0	6.3e-05	6.6e-05	6.9e-05	7e-05	6.8e-05	0	0	0.331	0.34	0.351	0.353	0.339	0	0	0.02358	0.022846	0.022133	0.021319	0.019188	0	0	0.018342	0.017358	0.016376
BEL	8.6	Other mobile sources	0.00595	0.0051	0.00499	0.00501	0.00456	0.00474	0.00482	4.04375	3.99775	15.6396	15.6017	14.6868	14.3021	14.1618	0.162401	0.155649	1.59395	1.57861	1.54747	1.53314	1.50799	0	0	0.001204	0.001232	0.001276	0.001315	0.001261	0.6127	0.5917	4.47859	4.25856	3.92441	3.65049	3.27868	0.1006	0.0989	0.263441	0.256509	0.254855	0.251583	0.236298	0.0448	0.0431	0.184777	0.176421	0.171503
BEL	9.1	Landfills	48.8633	46.6203	38.255	32.4048	27.6567	22.962	20.1867	0	0	0	0	0	0	0	0.9118	0.7836	0.6041	0.5122	0.4448	0.3863	0.3393	0	0	0	0	0	0	0	0	0	0	0	0	0	0	0.2515	0.2497	0	0	0	0	0	0.2515	0.2497	0	0	0
BEL	9.2	Controlled waste incineration	2e-05	2e-05	2e-05	2e-05	2e-05	2e-05	2e-05	0.23585	0.287687	0.214963	0.161313	0.18496	0.055299	0.043166	0.141036	0.113534	0.223284	0.100166	0.216457	0.280154	0.183805	0	0	0	0	0	0	0.00357	1.38318	1.50814	1.11673	1.11849	0.948826	1.0247	0.663585	0.0064	0.00855333	0.00568	0.00896	0.01628	0.006	0.00441	0.0059	0.00838667	0.005465	0.00896	0.01628
BEL	9.3	Other waste treatment	8.62841	8.62716	8.4529	9.29132	9.2133	8.75501	8.74568	0.0342992	0.0253132	0.0252773	0.0255103	0.0236203	0.0234962	0.0326517	0.02538	0.0274407	0.0262183	0.0260795	0.0272081	0.0260826	0.0277325	2.10276	2.04012	1.99833	1.99835	1.88835	1.76635	1.79995	0.0479468	0.0437953	0.0377143	0.0387086	0.0343662	0.0377809	0.124089	0.15435	0.159353	0.156186	0.153495	0.15864	0.156789	0.156793	0.15435	0.159353	0.156186	0.153495	0.15864
BEL	10.1	Livestock, Cattle	174.088	172.132	169.783	167.996	170.677	169.571	170.706	0	0	0	0	0	0	0	0	0	0	0	0	0	0	28.8039	26.8042	30.7142	30.3026	28.9307	28.7676	28.6228	0	0	0	0	0	0	0	0.790598	0.781992	0.765429	0.756202	0.761292	0.752024	0.753003	0.181662	0.179603	0.175645	0.17353	0.174823
BEL	10.2	Livestock, Poultry	1.21808	1.21795	1.22404	1.13271	1.15872	1.15674	1.15448	0	0	0	0	0	0	0	0	0	0	0	0	0	0	4.63298	4.45802	4.19072	4.00143	3.95106	3.91264	3.88016	0	0	0	0	0	0	0	0.8668	0.97002	0.90281	0.84583	0.85218	0.84072	0.85769	0.23422	0.26264	0.24176	0.22725	0.22798
BEL	10.3	Livestock, Sheep	0.94055	1.00236	1.02187	1.02909	1.01536	0.94876	0.93112	0	0	0	0	0	0	0	0	0	0	0	0	0	0	0.0431511	0.0468363	0.115456	0.117198	0.113323	0.105672	0.105666	0	0	0	0	0	0	0	0	0	0	0	0	0	0	0	0	0	0	0
BEL	10.4	Livestock, Goats	0.16948	0.14343	0.13655	0.15402	0.15701	0.17138	0.18176	0	0	0	0	0	0	0	0	0	0	0	0	0	0	0.0368576	0.0300609	0.0361118	0.0410202	0.0408373	0.0460064	0.045647	0	0	0	0	0	0	0	0	0	0	0	0	0	0	0	0	0	0	0
BEL	10.5	Livestock, Pigs	70.9339	69.3654	68.8785	69.3372	70.8474	71.3117	71.9886	0	0	0	0	0	0	0	0	0	0	0	0	0	0	25.3358	22.5186	22.8172	22.717	22.1981	22.3792	22.4465	0	0	0	0	0	0	0	1.3306	1.2955	1.25964	1.26856	1.29773	1.31007	1.32403	0.3017	0.29374	0.28553	0.28754	0.29419
BEL	10.6	Livestock, Other animals	0.99137	0.99288	1.01473	1.05755	1.0939	1.14962	1.16279	0	0	0	0	0	0	0	0	0	0	0	0	0	0	0.360831	0.354552	0.337683	0.342565	0.346224	0.34598	0.348551	0	0	0	0	0	0	0	0	0	0	0	0	0	0	0	0	0	0	0
BEL	10.7	Crops and pastures	0	0	0	0	0	0	0	0	0	0	0	0	0	0	0	0	0	0	0	0	0	12.2696	11.9391	7.28365	7.54288	6.41741	6.06846	6.06846	0	0	0	0	0	0	0	0	0	0	0	0	0	0	0	0	0	0	0
BEL	10.8	Agricultural waste burning	0.873	0.873	0.873	0.873	0.873	0.873	0.873	0.00751723	0.00836947	0.0078	0.00726674	0.00705851	0.00705851	0.00747036	1.1328	1.1314	1.13	1.1314	1.1328	1.1342	1.1356	0.172	0.171	0.17	0.171	0.172	0.173	0.174	0.0232	0.0216	0.02	0.0216	0.0232	0.0248	0.0264	0.95402	0.95402	0.95402	0.95402	0.95402	0.95402	0.95402	0.846522	0.846521	0.84652	0.846521	0.846522
BEL	10.9	Rice cultivation	0	0	0	0	0	0	0	0	0	0	0	0	0	0	0	0	0	0	0	0	0	0	0	0	0	0	0	0	0	0	0	0	0	0	0	0	0	0	0	0	0	0	0	0	0	0	0
BEL	10.10	Storage and handling of agricultural products	0	0	0	0	0	0	0	0	0	0	0	0	0	0	0	0	0	0	0	0	0	0	0	0.154	0.197	0.348	0.571	0.571	0	0	0	0	0	0	0	0	0	0	0	0	0	0	0	0	0	0	0
BEL	10.11	Other agriculture	0	0	0	0	0	0	0	0	0	0	0	0	0	0	1.00785	0.9282	0	0	0	0	0	0	0	0	0	0	0	0	0	0	0	0	0	0	0	0	0	0	0	0	0	0	0	0	0	0	0
CHE	1.1	Power plants	0.06128	0.05801	0.05735	0.0496	0.04661	0.05359	0.05259	1.09362	1.05544	1.07197	1.1032	1.20059	1.40457	1.45364	0.0800196	0.0808517	0.0827586	0.0856276	0.0837386	0.089708	0.0886537	0.0263311	0.0275205	0.0287647	0.0318309	0.0360157	0.0439736	0.0463437	1.68612	1.73294	1.83322	2.00037	2.02488	2.18853	2.21892	0.138427	0.138938	0.143962	0.157737	0.207095	0.288709	0.308595	0.129995	0.13309	0.13946	0.154798	0.204799
CHE	1.2	Refineries	0.01583	0.02846	0.03525	0.03603	0.03255	0.04147	0.03679	0.157878	0.310598	0.38826	0.409539	0.350368	0.45541	0.406487	1.97811	2.25956	2.12013	2.40376	2.0683	2.22576	2.11732	1.9281e-05	2.85007e-05	3.02469e-05	3.32987e-05	2.78356e-05	3.21656e-05	3.031e-05	0.676199	1.02584	1.14095	1.20718	1.06257	1.25957	1.15791	0.0676543	0.10292	0.126219	0.118688	0.122731	0.150369	0.131095	0.0676543	0.10292	0.126219	0.118688	0.122731
CHE	2.1	Residential combustion (including commercial/institutional)	3.43828	3.35944	3.32837	3.12654	2.75595	2.86473	2.74652	68.3329	64.7957	62.9459	58.1257	49.4466	50.2809	47.6759	7.63907	7.28323	7.19817	6.73407	5.82176	6.05876	5.77631	0.205342	0.203693	0.211018	0.213506	0.195912	0.217011	0.217897	10.9372	10.7785	10.9009	10.4781	9.28996	9.91131	9.78394	3.01861	2.88007	2.84169	2.71344	2.35897	2.47294	2.3913	3.01861	2.88007	2.84169	2.71344	2.35897
CHE	2.2	Agricultural stationary combustion	0.08659	0.08454	0.08338	0.08097	0.07898	0.07814	0.07699	1.65541	1.56076	1.46772	1.25667	1.17286	1.08778	1.08296	0.0366957	0.0332581	0.031919	0.0282206	0.0243046	0.0241346	0.0225022	0.00509546	0.0052418	0.00587992	0.00535759	0.00503527	0.0056722	0.00575207	0.0997679	0.10073	0.105292	0.0930568	0.0935131	0.0977435	0.100584	0.196893	0.19316	0.190004	0.162845	0.170998	0.159181	0.163232	0.196893	0.19316	0.190004	0.162845	0.170998
CHE	34.1	Iron and steel industry (including coke ovens)	0.02122	0.01815	0.01735	0.0178	0.01753	0.01769	0.01539	1.64126	1.61645	1.57779	1.64561	1.68865	1.78978	1.13473	0.522634	0.489307	0.483664	0.494713	0.520797	0.559038	0.361231	0.00513417	0.00465759	0.00468543	0.00469946	0.00502882	0.00544293	0.0034092	0.437198	0.399654	0.377503	0.405241	0.392428	0.403085	0.310206	0.0572657	0.0458891	0.0446028	0.0479415	0.0454095	0.0478311	0.0344893	0.0438778	0.0327932	0.0317483	0.034638	0.0315608
CHE	34.2	Non-ferrous metal industry	0.00469	0.00515	0.00515	0.00412	0.0036	0.00349	0.00254	1.87679	1.907	1.88984	0.566356	0.0810781	0.0647245	0.0460295	0.0507766	0.0492152	0.0466287	0.0234387	0.014727	0.0114587	0.0080138	0.00785644	0.00805036	0.00795657	0.0090682	0.00886368	0.00830105	0.00768587	0.038731	0.0397698	0.038111	0.0256385	0.0199993	0.0185435	0.0146921	0.0741483	0.0742267	0.0725672	0.0297883	0.0136394	0.0114163	0.00921168	0.0533118	0.052999	0.0514927	0.0215122	0.0102534
CHE	34.3	Chemical industry	0.3848	0.38602	0.38361	0.38485	0.38088	0.37983	0.3811	1.18582	1.18891	1.18366	1.1895	1.17698	1.17093	1.17043	0.0625467	0.0641375	0.0615426	0.0633452	0.0606038	0.0605571	0.0594052	0.00998565	0.010833	0.00829931	0.0100142	0.00877493	0.0106623	0.0097538	0.460023	0.457976	0.452763	0.48716	0.474975	0.433611	0.428575	0.0497091	0.0501449	0.049385	0.0554251	0.0537589	0.0450472	0.031349	0.0411761	0.0414865	0.0412138	0.0463964	0.0451827
CHE	34.4	Paper and pulp industry	0.04839	0.04152	0.04294	0.0354	0.03009	0.02918	0.02412	0.428852	0.380619	0.377792	0.345529	0.317547	0.278259	0.170272	0.240346	0.25528	0.251626	0.265385	0.278485	0.269586	0.227694	1.07482e-05	9.49827e-06	9.63858e-06	8.40791e-06	6.4517e-06	5.89374e-06	4.96996e-06	0.586869	0.528802	0.51535	0.495068	0.306604	0.278426	0.207621	0.261632	0.265194	0.259058	0.269444	0.25157	0.239916	0.185145	0.188677	0.198324	0.194132	0.206008	0.189545
CHE	34.5	Cement industry	0	0	0	0	0	0	0	2.5439	2.69866	2.84452	2.85256	2.90286	2.86329	2.7177	0.176212	0.188153	0.198031	0.198554	0.202284	0.200347	0.19157	0.0708652	0.0750837	0.0791641	0.0793907	0.0807734	0.07961	0.075455	0.0132899	0.0146403	0.0153021	0.0153289	0.0157009	0.0158512	0.0156711	0.72182	0.795166	0.831112	0.832566	0.852769	0.860932	0.85115	0.361341	0.398058	0.416052	0.41678	0.426894
CHE	34.6	Other non-metallic minerals industry	0	0	0	0	0	0	0	3.88694	3.58669	3.38802	3.18446	2.9761	2.9733	2.96947	5.17282	5.07664	4.85997	5.18011	4.78204	4.77359	4.74849	0	0	0	0	0	0	0	0.00029045	0.00029526	0.000298486	0.000302216	0.000322525	0.000322836	0.000260769	0.391019	0.381382	0.374838	0.368182	0.362286	0.361699	0.357705	0.231844	0.224189	0.219034	0.213781	0.208866
CHE	34.7	Storage and handling in industry	0	0	0	0	0	0	0	0.009765	0.00994481	0.0107803	0.0106459	0.0103637	0.00974437	0.00968131	0.00426109	0.00433956	0.00470415	0.00464548	0.00452235	0.00425209	0.00422457	0	0	0	0	0	0	0	0.00165709	0.0016876	0.00182939	0.00180658	0.00175869	0.00165359	0.00164289	0.0891988	0.0908414	0.0984735	0.0972454	0.0946678	0.0890104	0.0884344	0.0446527	0.0454749	0.0492956	0.0486808	0.0473904
CHE	34.8	Other industries	0.26019	0.27395	0.27417	0.28003	0.27852	0.29402	0.26901	13.4809	13.5653	12.6734	12.6549	12.4423	12.5301	12.5398	3.7122	3.73719	3.60115	3.67258	3.65769	3.71469	3.70111	0.296561	0.302309	0.307642	0.317249	0.346279	0.344276	0.346611	6.99299	7.22075	7.28937	7.20148	7.2018	7.34614	7.14211	1.59918	1.61971	1.64679	1.65821	1.74388	1.82831	1.81752	0.915973	0.913568	0.916817	0.918854	0.978176
CHE	5.1	Coal production	0.01418	0.01307	0.01234	0.01159	0.01083	0.01081	0.01079	0.0454313	0.051573	0.0481642	0.0546853	0.0470581	0.050469	0.0480648	0.015901	0.0180505	0.0168575	0.0191398	0.0164703	0.0176641	0.0168227	0	0	0	0	0	0	0	0.195355	0.221764	0.207106	0.235147	0.20235	0.217017	0.206679	0.000679662	0.000650773	0.000737773	0.000794055	0.000909822	0.000822044	0.000766154	0.000226554	0.000216924	0.000245924	0.000264685	0.000303274
CHE	5.2	Oil production	0	0	0	0	0	0	0	0	0	0	0	0	0	0	0	0	0	0	0	0	0	0	0	0	0	0	0	0	0	0	0	0	0	0	0	0	0	0	0	0	0	0	0	0	0	0	0
CHE	5.3	Gas production	8.5872	8.473	8.36777	8.21648	8.13687	8.25901	8.25677	0.0115668	0.0119556	0.0127332	0.012393	0.011556	0.012312	0.011826	7.7112e-05	7.9704e-05	8.4888e-05	8.262e-05	7.704e-05	8.208e-05	7.884e-05	0.000462672	0.000478224	0.000509328	0.00049572	0.00046224	0.00049248	0.00047304	0.0462672	0.0478224	0.0509328	0.049572	0.046224	0.049248	0.047304	0.000154224	0.000159408	0.000169776	0.00016524	0.00015408	0.00016416	0.00015768	0.000154224	0.000159408	0.000169776	0.00016524	0.00015408
CHE	5.4	Gasoline distribution	0	0	0	0	0	0	0	0	0	0	0	0	0	0	3.56582	2.97725	2.84986	2.68266	2.66708	2.59485	2.54177	0	0	0	0	0	0	0	0	0	0	0	0	0	0	0	0	0	0	0	0	0	0	0	0	0	0
CHE	5.5	Flaring	0	0	0	0	0	0	0	0	0	0	0	0	0	0	1.34983	1.2706	1.25688	1.22612	1.19383	1.08793	1.08138	0	0	0	0	0	0	0	0	0	0	0	0	0	0	0	0	0	0	0	0	0	0	0	0	0	0
CHE	6.1	Solvent and other product use	0	0	0	0	0	0	0	0.013912	0.012062	0.009102	0.010582	0.011988	0.013246	0.013098	50.8257	44.6485	43.4904	42.4711	42.0113	41.6369	41.254	0.0953639	0.102978	0.10781	0.107583	0.114372	0.113085	0.0982236	0.0004888	0.0004238	0.0003198	0.0003718	0.0004212	0.0004654	0.0004602	0.462743	0.415321	0.341086	0.37485	0.406814	0.435179	0.429343	0.293543	0.268621	0.230386	0.24615	0.261014
CHE	7.1	Road transport, light duty vehicles	1.47963	1.35544	1.23037	1.09089	1.02396	0.936267	0.854447	168.642	156.302	146.998	132.062	124.217	114.644	107.485	21.3505	19.5619	18.2604	16.2889	15.3545	14.0765	13.2164	4.12699	3.9213	3.73076	3.46094	3.28085	3.08377	2.93439	32.2246	30.9119	29.9458	27.4556	26.8146	25.3473	24.4314	1.04395	1.0472	1.05828	1.04758	1.0155	0.930862	0.914094	1.04395	1.0472	1.05828	1.04758	1.0155
CHE	7.2	Road transport, heavy duty vehicles	0.209667	0.213904	0.219176	0.214108	0.222401	0.226221	0.231126	4.50028	4.33125	4.31579	4.28281	4.20269	3.98084	3.96614	1.15737	1.0398	1.00369	0.926415	0.826927	0.644376	0.566869	0.00727444	0.00738633	0.0073867	0.00761949	0.00768723	0.00774668	0.00789273	20.9715	20.1563	19.9476	19.5281	18.661	16.6568	15.7968	0.568711	0.513998	0.501554	0.467679	0.42111	0.332997	0.297212	0.568711	0.513998	0.501554	0.467679	0.42111
CHE	7.3	Road transport, mopeds and motorcycles	0.0890704	0.0891912	0.0896627	0.0849997	0.085745	0.0847618	0.0842173	27.7821	26.9366	25.7415	24.5617	22.8021	22.1677	20.7094	3.47538	3.39157	3.09128	2.88326	2.65638	2.61627	2.40075	0.00383505	0.00392689	0.00399284	0.00413777	0.00421508	0.00435927	0.00442146	0.485996	0.49038	0.48985	0.498775	0.499356	0.496812	0.490536	0	0	0	0	0	0	0	0	0	0	0	0
CHE	7.4	Road transport, gasoline evaporation	0	0	0	0	0	0	0	0	0	0	0	0	0	0	1.4339	1.23715	1.14236	0.995974	0.966197	0.91859	0.880146	0	0	0	0	0	0	0	0	0	0	0	0	0	0	0	0	0	0	0	0	0	0	0	0	0	0
CHE	7.5	Road transport, wear	0	0	0	0	0	0	0	0	0	0	0	0	0	0	0	0	0	0	0	0	0	0	0	0	0	0	0	0	0	0	0	0	0	0	0	2.47022	2.51267	2.55104	2.59005	2.63223	2.68215	2.72345	0.370533	0.3769	0.382656	0.388507	0.394835
CHE	8.1	Air transport (<1000m)	0.01027	0.0104	0.0099	0.00921	0.01061	0.01265	0.01248	4.77829	4.53216	4.56161	4.27846	4.40082	4.57659	4.461	0.281212	0.275181	0.273164	0.271028	0.298289	0.328501	0.307672	0	0	0	0	0	0	0	2.01616	1.95078	1.8945	1.93143	2.08617	2.09281	2.06174	0.11615	0.109085	0.10697	0.106023	0.108197	0.111731	0.107421	0.0440623	0.0396709	0.0368892	0.0374508	0.0393156
CHE	8.2	Rail transport	0.00038	0.00039	0.00039	0.00039	0.0004	0.0004	0.0004	0.304195	0.295646	0.286672	0.286407	0.286081	0.285692	0.285242	0.0822789	0.0764195	0.070316	0.069183	0.0680134	0.0668072	0.0655644	0.00029491	0.000297782	0.000300653	0.000303529	0.000306405	0.000309281	0.000312157	0.664099	0.646438	0.627847	0.61108	0.593574	0.57533	0.556348	1.10904	1.13162	1.15413	1.17655	1.1989	1.22118	1.24337	0.192409	0.193821	0.19516	0.196418	0.197601
CHE	8.3	Navigation, non-international	0	0	0	0	0	0	0	1.40614	1.40586	1.40558	1.40561	1.40564	1.40566	1.40569	0.191402	0.191201	0.191	0.190943	0.190887	0.190829	0.190772	0	0	0	0	0	0	0	0.667621	0.667812	0.668	0.667673	0.667342	0.667008	0.666671	0.235019	0.23501	0.235	0.23491	0.23482	0.234729	0.234637	0.0950183	0.0950093	0.095	0.0949147	0.0948288
CHE	8.4	Mobile machinery, agriculture	0	0	0	0	0	0	0	23.8768	23.5415	23.2056	22.8194	22.4328	22.0458	21.6584	3.58195	3.36401	3.15021	2.98221	2.81574	2.65077	2.48733	0.00348807	0.00349569	0.00350331	0.00350802	0.00351273	0.00351744	0.00352215	5.26253	5.13791	5.00999	4.77928	4.54446	4.30554	4.06251	3.37287	3.33119	3.28947	3.2499	3.2105	3.13709	3.06386	1.04556	1.02149	0.997367	0.957673	0.918157
CHE	8.5	Mobile machinery, industry	0	0	0	0	0	0	0	8.34773	8.05974	7.76883	7.42648	7.08442	6.74265	6.40116	1.25876	1.17901	1.09899	1.00372	0.908936	0.81463	0.720804	0.00410558	0.00412614	0.00414671	0.00414211	0.00413751	0.00413292	0.00412832	6.33006	6.03809	5.74139	5.33641	4.93161	4.52697	4.1225	2.13959	2.10142	2.06301	2.01185	1.96089	1.89535	1.83003	0.740315	0.704008	0.667458	0.616308	0.565368
CHE	8.6	Other mobile sources	0.00593	0.00538	0.00586	0.00604	0.00568	0.00542	0.00551	11.607	11.3871	11.3614	11.2897	11.118	10.9667	10.8816	1.86605	1.69171	1.53475	1.41844	1.30195	1.19106	1.08798	0.000308595	0.000307018	0.000305441	0.000303884	0.000302327	0.000300771	0.000299214	0.325865	0.3058	0.323631	0.329018	0.314329	0.303352	0.305161	0.0925047	0.0862734	0.0833852	0.0762487	0.0675605	0.0589874	0.0514973	0.067796	0.0622115	0.0585911	0.0512161	0.0431167
CHE	9.1	Landfills	15.0431	15.0005	14.0673	13.5349	12.3862	11.146	10.0899	0.0734331	0.0455824	0.0385644	0.0319313	0.0277127	0.0247499	0.0218982	0.0097744	0.00230664	0.00136444	0.00042224	0.0001196	9.488e-05	0	0.300789	0.299993	0.281336	0.270694	0.247722	0.222919	0.201797	0.00405008	0.00261771	0.00223087	0.00186667	0.00162686	0.00145326	0.00128813	0.0107835	0.00320956	0.00217151	0.00114252	0.000762869	0.000670255	0.000515253	9.7744e-05	2.30664e-05	1.36444e-05	4.2224e-06	1.196e-06
CHE	9.2	Controlled waste incineration	0.188	0.18873	0.1883	0.18788	0.18781	0.18773	0.18764	1.516	1.51746	1.5166	1.51576	1.51562	1.51546	1.51528	0.480421	0.480459	0.480436	0.480414	0.48041	0.480406	0.480401	0.00840972	0.00916111	0.00869486	0.00824053	0.0081509	0.00805043	0.00793913	0.13555	0.1429	0.141397	0.139894	0.141259	0.142624	0.143988	0.483364	0.483664	0.483478	0.483296	0.48326	0.48322	0.483176	0.00715472	0.00736511	0.00723456	0.00710735	0.00708225
CHE	9.3	Other waste treatment	4.38926	4.3802	4.71494	4.94896	5.12787	6.03031	6.34324	0.337977	0.338178	0.336354	0.346152	0.354104	0.355359	0.350776	1.4503	1.44487	1.49991	1.55507	1.56092	1.59793	1.63473	0.209581	0.210211	0.21212	0.214063	0.214787	0.218396	0.221975	0.203924	0.203369	0.201443	0.205496	0.209423	0.209826	0.208337	0.00726205	0.00692088	0.00694986	0.00675047	0.00665656	0.00656195	0.00602514	0.00576205	0.00542088	0.00544986	0.00525047	0.00515656
CHE	10.1	Livestock, Cattle	126.736	125.938	126.837	128.07	129.876	134.057	132.314	0	0	0	0	0	0	0	0	0	0	0	0	0	0	38.8085	38.6101	39.3852	40.1854	40.8294	41.9834	41.5015	1.25418	1.23086	1.24089	1.24625	1.2501	1.28731	1.24148	0.360686	0.354519	0.35792	0.360934	0.362285	0.370921	0.36463	0.0545037	0.0535721	0.0540844	0.0545396	0.0547434
CHE	10.2	Livestock, Poultry	0.97763	1.03503	1.05757	0.97812	1.05351	1.09603	1.13051	0	0	0	0	0	0	0	0	0	0	0	0	0	0	1.3334	1.40506	1.45765	1.37612	1.46786	1.49377	1.53797	0.0863674	0.0922126	0.0965501	0.0916834	0.0992904	0.101632	0.104646	0.652484	0.692773	0.710353	0.658057	0.707623	0.734711	0.757656	0.0986314	0.104722	0.107379	0.0994738	0.106966
CHE	10.3	Livestock, Sheep	5.13305	5.20936	5.16134	5.04789	4.92029	4.98068	5.14279	0	0	0	0	0	0	0	0	0	0	0	0	0	0	0.778143	0.752456	0.739072	0.741713	0.701533	0.70264	0.702289	0.0540389	0.052884	0.0525932	0.0533994	0.0512253	0.0512896	0.0512306	0.0173476	0.0171804	0.0174077	0.0175851	0.0172998	0.0174	0.0168437	0.00266887	0.00264313	0.0026781	0.0027054	0.0026615
CHE	10.4	Livestock, Goats	0.76549	0.79088	0.82571	0.84713	0.79415	0.81367	0.8622	0	0	0	0	0	0	0	0	0	0	0	0	0	0	0.198163	0.192257	0.189497	0.185117	0.176782	0.182043	0.185045	0.0150095	0.015529	0.0163813	0.017197	0.0177311	0.0182588	0.0185599	0.00262907	0.00275445	0.00288483	0.0029757	0.00308416	0.00317636	0.00332011	0.000404472	0.000423762	0.00044382	0.0004578	0.000474486
CHE	10.5	Livestock, Pigs	10.4632	10.5072	10.943	11.0963	10.7031	10.4582	10.5838	0	0	0	0	0	0	0	0	0	0	0	0	0	0	8.16304	8.08829	8.36947	8.27646	7.83241	7.73643	7.8496	0.34119	0.337243	0.3479	0.343719	0.324387	0.320075	0.324733	1.11001	1.11623	1.16849	1.18686	1.14206	1.11813	1.13053	0.166654	0.167588	0.175435	0.178193	0.171467
CHE	10.6	Livestock, Other animals	1.49493	1.53283	1.59067	1.63332	1.694	1.74271	1.79042	0	0	0	0	0	0	0	0	0	0	0	0	0	0	0.643687	0.675247	0.714122	0.748976	0.785952	0.805175	0.828983	0.0439064	0.0452041	0.0469397	0.0483653	0.0498844	0.0510938	0.0525709	0.0026043	0.00267333	0.00277228	0.00284224	0.00292036	0.0029943	0.00309445	0.000400662	0.000411282	0.000426504	0.000437268	0.000449286
CHE	10.7	Crops and pastures	0	0	0	0	0	0	0	0	0	0	0	0	0	0	0	0	0	0	0	0	0	3.79415	3.96644	3.7611	3.66121	4.09915	3.7973	3.53432	0	0	0	0	0	0	0	0	0	0	0	0	0	0	0	0	0	0	0
CHE	10.8	Agricultural waste burning	0.455	0.455	0.455	0.455	0.455	0.455	0.455	0.00201108	0.0024511	0.0024	0.00232201	0.00239174	0.00239174	0.00232554	0.5908	0.5904	0.59	0.5904	0.5908	0.5912	0.5916	0.0904	0.0902	0.09	0.0902	0.0904	0.0906	0.0908	0.0924	0.0912	0.09	0.0912	0.0924	0.0936	0.0948	0.497	0.497	0.497	0.497	0.497	0.497	0.497	0.441	0.441	0.441	0.441	0.441
CHE	10.9	Rice cultivation	0	0	0	0	0	0	0	0	0	0	0	0	0	0	0	0	0	0	0	0	0	0	0	0	0	0	0	0	0	0	0	0	0	0	0	0	0	0	0	0	0	0	0	0	0	0	0
CHE	10.10	Storage and handling of agricultural products	0	0	0	0	0	0	0	0	0	0	0	0	0	0	0	0	0	0	0	0	0	0	0	0	0	0	0	0	0	0	0	0	0	0	0	0	0	0	0	0	0	0	0	0	0	0	0
CHE	10.11	Other agriculture	0	0	0	0	0	0	0	0	0	0	0	0	0	0	0	0	0	0	0	0	0	3.69427	3.38875	3.39873	3.39008	3.36079	3.30093	3.1137	0	0	0	0	0	0	0	0	0	0	0	0	0	0	0	0	0	0	0
DEU	1.1	Power plants	33.8248	38.5794	43.8089	53.359	64.9428	73.4628	74.6591	130.124	129.591	131.412	136.121	146.242	148.699	145.975	8.88665	9.37968	9.60226	10.7998	12.292	12.6844	12.5747	2.07032	2.03133	2.05634	1.96879	1.89515	1.73026	1.9611	259.787	257.431	258.6	268.169	284.253	280.992	271.269	10.1463	10.357	9.78779	9.89786	10.3152	9.79177	9.36097	8.991	9.17008	8.66108	8.75718	9.13297
DEU	1.2	Refineries	0.37222	0.38086	0.40145	0.37295	0.36526	0.36151	0.34954	1.74516	1.78098	1.82104	1.78438	1.77786	1.68185	1.59425	66.2575	67.2444	64.7789	65.082	63.7162	63.0389	61.2928	0.758713	0.773453	0.799947	0.768214	0.761698	0.754862	0.712539	20.9017	21.2551	22.132	20.7003	20.5604	20.1292	18.9314	1.47074	1.51804	1.59513	1.36692	1.28821	1.17991	1.05544	1.30733	1.34937	1.41789	1.21504	1.14508
DEU	2.1	Residential combustion (including commercial/institutional)	28.4844	26.2527	25.9037	27.9737	27.517	30.0315	29.9425	827.589	760.944	739.841	795.507	779.014	852.867	848.893	48.3723	41.6011	37.2561	39.5309	36.9115	41.8396	42.2487	3.06739	2.78991	2.7739	2.89997	1.9049	2.64014	2.35152	101.231	93.3326	90.6395	93.4905	75.1374	90.8061	86.3208	25.467	23.7999	23.3935	24.7556	23.206	25.7092	26.2032	23.8725	22.3731	22.0433	23.3147	21.8422
DEU	2.2	Agricultural stationary combustion	1.24058	1.15254	1.13149	1.17578	1.21896	1.22953	1.17935	24.1313	23.5098	23.5265	24.6228	25.7298	26.0467	24.9138	1.41544	1.31149	1.2265	1.2485	1.24707	1.27144	1.2446	0.0668912	0.0634599	0.0636846	0.0651836	0.043563	0.0597096	0.0525937	2.25828	2.15144	2.15655	2.21045	1.8765	2.1873	2.01586	0.770146	0.784639	0.809614	0.81629	0.811756	0.821652	0.808146	0.710936	0.731837	0.762488	0.768609	0.763371
DEU	34.1	Iron and steel industry (including coke ovens)	4.13441	4.30757	4.18862	4.24363	4.49161	4.00861	3.18049	870.308	877.342	856.938	872.16	903.231	833.323	591.256	10.1246	10.5968	10.5744	10.7876	11.1359	10.1943	7.39516	0.187016	0.188247	0.18249	0.19837	0.203283	0.189641	0.142628	46.3658	47.5863	43.2099	43.24	43.4905	38.5665	30.119	25.9093	25.5592	23.7969	23.724	23.237	7.34675	5.45996	10.7029	10.4967	9.67407	9.36655	8.88407
DEU	34.2	Non-ferrous metal industry	0.00776	0.01155	0.01135	0.00801	0.00776	0.00866	0.00672	119.32	120.697	116.519	93.1256	99.8766	109.235	52.6474	0.121671	0.127985	0.113336	0.0890529	0.088267	0.0893852	0.0744961	0.00964421	0.0118674	0.0111642	0.0100891	0.00964225	0.00992036	0.00818831	1.72689	1.82989	1.59923	1.37376	1.30219	1.22836	0.995347	2.03497	2.05647	1.98912	1.65961	1.722	1.72046	0.947006	1.66937	1.68715	1.63225	1.36079	1.41227
DEU	34.3	Chemical industry	0.01045	0.01019	0.00998	0.01893	0.01994	0.0182	0.01481	0.905627	0.866401	0.831263	1.57711	1.6616	1.51647	1.23385	5.06532	5.24775	5.38975	5.26453	5.33913	5.19337	4.49525	7.90695	7.90466	7.90789	9.45512	7.90766	7.90613	7.90247	24.5503	27.8669	28.5937	30.0263	31.9077	29.2824	25.2188	0.474972	0.480668	0.473104	0.538008	0.539328	0.534113	0.490743	0.303007	0.30608	0.302	0.337009	0.337722
DEU	34.4	Paper and pulp industry	0.06152	0.06625	0.08011	0.06938	0.12214	0.11643	0.10799	0	0	0	0	0	0	0	1.1479	1.78183	2.61983	3.19685	3.43685	3.47465	3.44317	0	0	0	0	0	0	0	0.542927	0.84276	1.23911	1.51202	1.62554	1.64341	1.62853	0.00980712	0.0127009	0.0163134	0.0226811	0.0238099	0.0235094	0.0228035	0.0062964	0.00815425	0.0104736	0.0145618	0.0152865
DEU	34.5	Cement industry	0	0	0	0	0	0	0	0	0	0	0	0	0	0	1.16071	1.20894	1.12141	1.14637	1.24165	1.16684	1.06865	1.16071	1.20894	1.12141	1.14637	1.24165	1.16684	1.06865	27.5669	27.2011	24.5309	24.3604	25.6091	23.3369	21.3731	2.21059	2.15012	2.0668	2.27002	2.25331	2.26674	2.05477	2.01409	1.959	1.88308	2.06824	2.05301
DEU	34.6	Other non-metallic minerals industry	0	0	0	0	0	0	0	0	0	0	0	0	0	0	2.0116	1.91926	2.06178	2.06657	1.8985	1.89286	1.95053	1.29498	1.27186	1.32044	1.29539	1.27136	1.30859	1.10776	11.3802	11.3121	11.1625	11.3227	11.5623	10.3502	7.5078	3.96299	3.86231	3.50582	3.77548	3.63664	3.83027	3.62374	0.626004	0.587025	0.561736	0.589958	0.563681
DEU	34.7	Storage and handling in industry	0	0	0	0	0	0	0	0	0	0	0	0	0	0	1.07536	0.98283	0.888493	0.991766	1.00783	0.938139	0.745665	1.24252	1.23092	1.23888	1.2493	1.13953	0.942354	0.646778	15.2828	15.4286	14.9827	16.1156	16.3103	15.1816	13.2773	2.22695	2.19555	1.86096	1.92744	1.82107	1.4873	1.27937	1.36345	1.34344	1.13777	1.17784	1.11312
DEU	34.8	Other industries	3.56247	4.41552	4.6954	5.49828	4.68273	4.52296	4.20461	184.634	151.542	150.093	163.329	162.985	175.343	160.888	22.7281	24.4171	24.3111	23.9555	23.3546	22.6032	22.5314	0.712925	0.908337	0.990355	1.085	1.10193	1.16628	1.08871	68.8486	78.8147	84.3185	87.5442	85.2223	82.2279	74.0171	49.8557	49.8794	48.4746	48.6625	47.7273	46.5137	43.0362	14.802	15.0274	14.7148	14.3337	13.7028
DEU	5.1	Coal production	389.021	310.576	274.046	234.592	193.562	183.747	135.533	0	0	0	0	0	0	0	0	0	0	0	0	0	0	0	0	0	0	0	0	0	0	0	0	0	0	0	0	0	0	0	0	0	0	0	0	0	0	0	0
DEU	5.2	Oil production	632.28	566.05	540.596	501.249	457.117	444.125	398.915	0	0	0	0	0	0	0	61.8916	57.4005	58.766	58.1465	56.3687	51.3031	47.3788	0	0	0	0	0	0	0	0	0	0	0	0	0	0	0	0	0	0	0	0	0	0	0	0	0	0
DEU	5.3	Gas production	313.055	272.173	252.418	239.471	223.559	222.456	204.76	0.952034	0.940094	0.932316	0.92455	0.868585	0.834943	0.786328	0.00398283	0.00400263	0.00404144	0.00408187	0.00390692	0.00382748	0.00367519	0.00238605	0.0023982	0.0024216	0.0024459	0.0023412	0.0022938	0.0022026	1.39186	1.39895	1.4126	1.42677	1.3657	1.33805	1.28485	0.00572652	0.00575568	0.00581184	0.00587016	0.00561888	0.00550512	0.00528624	0.00509024	0.00511616	0.00516608	0.00521792	0.00499456
DEU	5.4	Gasoline distribution	0	0	0	0	0	0	0	0	0	0	0	0	0	0	27.9845	24.8401	19.6889	18.6427	17.2323	16.3214	15.7449	0	0	0	0	0	0	0	0	0	0	0	0	0	0	0	0	0	0	0	0	0	0	0	0	0	0
DEU	5.5	Flaring	0	0	0	0	0	0	0	1.67241	1.72488	1.77485	1.75303	1.72045	1.69015	1.59026	0.288574	0.297463	0.305614	0.30181	0.296346	0.290021	0.272442	0	0	0	0	0	0	0	7.73545	7.91412	8.12735	8.02755	7.83556	7.70723	7.26625	0	0	0	0	0	0	0	0	0	0	0	0
DEU	6.1	Solvent and other product use	0	0	0	0	0	0	0	0	0	0	0	0	0	0	702.563	738.984	742.624	746.656	706.904	668.734	668.734	1.7325	1.7325	1.7325	1.7325	1.7325	1.7325	1.7325	0	0	0	0	0	0	0	10.4403	10.4364	10.4284	10.4128	10.4006	10.3733	10.348	10.4403	10.4364	10.4284	10.4128	10.4006
DEU	7.1	Road transport, light duty vehicles	7.92397	7.25614	6.54763	6.08283	5.43935	4.9477	4.66587	1568.36	1445.94	1287.06	1163.17	1084.88	1004.36	942.02	97.9292	88.6729	78.1964	70.0086	64.6877	58.1999	55.0327	10.5115	10.2205	9.5508	9.08884	8.79802	8.51331	8.33423	277.656	280.952	269.577	259.509	253.624	245.623	240.764	11.3496	11.7677	11.247	9.93179	8.84958	7.59583	6.68342	11.3496	11.7677	11.247	9.93179	8.84958
DEU	7.2	Road transport, heavy duty vehicles	1.38005	1.19892	1.01006	0.900951	0.765919	0.65308	0.565259	93.7166	89.7473	85.0696	89.4874	83.2536	76.4696	72.6727	28.998	26.5284	23.9985	24.7997	23.8543	23.3448	23.5528	0.338672	0.323263	0.305907	0.325976	0.31624	0.309179	0.304168	519.075	478.391	434.143	441.436	395.386	343.76	310.648	11.5346	10.7151	9.68205	9.78484	8.44998	6.80073	5.80373	11.5346	10.7151	9.68205	9.78484	8.44998
DEU	7.3	Road transport, mopeds and motorcycles	1.22371	1.21599	1.20294	1.16041	1.08318	1.03526	1.0343	181.429	184.213	177.611	168.206	136.974	134.451	128.437	29.4217	30.2327	29.5124	28.4488	23.7157	23.414	22.4338	0.0303066	0.0316117	0.0319572	0.0322069	0.0276071	0.0284137	0.0284317	3.2455	3.37738	3.30934	3.21855	2.83076	2.82549	2.78187	0	0	0	0	0	0	0	0	0	0	0	0
DEU	7.4	Road transport, gasoline evaporation	0	0	0	0	0	0	0	0	0	0	0	0	0	0	30.1221	26.5083	22.9587	20.0269	18.0685	15.1442	14.3682	0	0	0	0	0	0	0	0	0	0	0	0	0	0	0	0	0	0	0	0	0	0	0	0	0	0
DEU	7.5	Road transport, wear	0	0	0	0	0	0	0	0	0	0	0	0	0	0	0	0	0	0	0	0	0	0	0	0	0	0	0	0	0	0	0	0	0	0	0	19.2928	19.603	19.1409	19.3848	19.6236	19.6011	19.3016	10.4212	10.5885	10.3391	10.4703	10.5985
DEU	8.1	Air transport (<1000m)	0.0787	0.07876	0.0823	0.08504	0.08689	0.08862	0.08299	22.8397	22.1017	23.5953	23.5139	23.5093	24.232	22.8952	1.85625	1.97234	2.09389	2.21975	2.33693	2.39819	2.33232	0.196544	0.205304	0.218413	0.230661	0.236526	0.237112	0.22442	14.1593	14.6802	15.4893	16.3233	16.7607	16.9837	16.2673	0.15119	0.15472	0.164313	0.174243	0.17731	0.175561	0.165987	0.15119	0.15472	0.164313	0.174243	0.17731
DEU	8.2	Rail transport	0.03821	0.03605	0.03074	0.02747	0.02572	0.02494	0.02204	4.15147	3.85265	3.69208	3.35103	3.28615	3.19944	3.05168	1.46955	1.37668	1.25577	1.13977	1.1177	1.08821	1.03795	0.0086444	0.00821898	0.00771595	0.0070032	0.0068676	0.0066864	0.0063776	24.5004	23.0953	21.8959	19.8733	19.4885	18.9743	18.098	0.564047	0.530124	0.482247	0.4377	0.381152	0.347693	0.309314	0.564047	0.530124	0.482247	0.4377	0.381152
DEU	8.3	Navigation, non-international	0	0	0	0	0	0	0	7.12627	7.87834	8.65292	7.60924	7.80142	7.75977	6.76033	1.62903	1.80531	1.987	1.74662	1.79153	1.78179	1.55175	0	0.0367552	0.039	0.0346345	0	0	0	30.251	33.6268	37.1751	32.3696	32.7889	32.2783	28.146	1.23405	1.36488	1.50136	1.31625	1.34331	1.33198	1.15743	1.17235	1.29664	1.42629	1.25043	1.27614
DEU	8.4	Mobile machinery, agriculture	0	0	0	0	0	0	0	59.5176	57.1917	54.0619	53.8153	48.6057	43.9087	37.9842	13.2685	12.503	11.5813	11.4274	10.9834	10.7861	10.2223	0.222759	0.216287	0.206641	0.210093	0.208385	0.212141	0.208345	50.5	47.913	44.6196	44.0693	42.2675	41.5766	39.3934	8.3775	7.81503	7.11851	6.95613	5.5021	4.19998	2.734	8.3775	7.81503	7.11851	6.95613	5.5021
DEU	8.5	Mobile machinery, industry	0	0	0	0	0	0	0	32.4473	30.5325	28.306	27.6045	26.7525	26.0466	24.6797	6.87924	6.32469	5.7147	5.44243	5.12514	4.87647	4.55942	0.161308	0.156621	0.149636	0.152136	0.150899	0.153619	0.150871	30.4904	27.855	24.8979	23.6405	21.6597	20.3728	18.6057	3.53992	3.11392	2.6793	2.45804	2.19394	2.02156	1.98739	3.53992	3.11392	2.6793	2.45804	2.19394
DEU	8.6	Other mobile sources	0.26142	0.22271	0.27723	0.24286	0.19249	0.19625	0.19542	40.6506	35.7262	39.5657	35.5567	30.3252	31.1679	31.4794	4.41108	3.83845	4.62909	3.90072	3.40251	3.3956	3.42163	0.0410529	0.036652	0.050991	0.0413111	0.0357915	0.03398	0.0332205	9.56243	8.34752	11.8833	9.21685	8.23276	7.70162	7.60899	0.191514	0.161278	0.371299	0.222694	0.222377	0.169989	0.160869	0.191514	0.161278	0.371299	0.222694	0.222377
DEU	9.1	Landfills	893	769	679	594	523	470	403	0	0	0	0	0	0	0	0	0	0	0	0	0	0	0	0	0	0	0	0	0	0	0	0	0	0	0	0	0	0	0	0	0	0	0	0	0	0	0	0
DEU	9.2	Controlled waste incineration	0	0	0	0	0	0	0	0	0	0	0	0	0	0	0	0	0	0	0	0	0	0	0	0	0	0	0	0	0	0	0	0	0	0	0	0	0	0	0	0	0	0	0	0	0	0	0
DEU	9.3	Other waste treatment	33.458	32.7415	32.1866	31.0931	31.8645	30.7314	30.2562	0	0	0	0	0	0	0	0.0048672	0.00491107	0.0047489	0.00475311	0.00488475	0.00515918	0.00533234	0	0	0	0	0	0	0	0.115502	0.116544	0.112695	0.112795	0.115919	0.122431	0.126541	0.007488	0.0075555	0.007306	0.00731248	0.007515	0.0079372	0.0082036	0.0059904	0.0060444	0.0058448	0.00584998	0.006012
DEU	10.1	Livestock, Cattle	1154.14	1122.31	1116.6	1090.82	1094.74	1114.98	1113.5	0	0	0	0	0	0	0	0	0	0	0	0	0	0	299.701	292.394	290.353	283.171	284.175	289.648	289.093	1.21872	1.18639	1.18057	1.15308	1.15492	1.17204	1.16839	4.91709	4.76769	4.70075	4.57866	4.54226	4.66497	4.65779	3.19685	3.09933	3.05596	2.97693	2.95327
DEU	10.2	Livestock, Poultry	3.40681	3.62848	3.61835	3.58731	3.90924	3.99038	4.09562	0	0	0	0	0	0	0	0	0	0	0	0	0	0	44.9361	48.4527	47.4832	46.3695	50.6335	51.3272	53.5333	0.0279173	0.0300201	0.0295378	0.0288036	0.0314692	0.031958	0.0328487	5.2198	5.30806	5.36995	5.44808	5.79372	5.98802	6.65843	0.726269	0.744711	0.760082	0.776409	0.832749
DEU	10.3	Livestock, Sheep	22.1664	22.3028	21.7237	21.0473	20.8582	20.0297	19.318	0	0	0	0	0	0	0	0	0	0	0	0	0	0	2.28741	2.31717	2.25632	2.19671	2.17819	2.09362	2.01086	0.00980242	0.00993135	0.00967048	0.00941595	0.00933666	0.00897434	0.00861884	0	0	0	0	0	0	0	0	0	0	0	0
DEU	10.4	Livestock, Goats	0.83502	0.83502	0.88721	0.9394	0.9394	0.99159	1.14816	0	0	0	0	0	0	0	0	0	0	0	0	0	0	0.334454	0.334454	0.355358	0.376261	0.376261	0.397165	0.459875	0.00132094	0.00132094	0.0014035	0.00148605	0.00148605	0.00156861	0.00181629	0	0	0	0	0	0	0	0	0	0	0	0
DEU	10.5	Livestock, Pigs	128.578	125.391	131.613	129.71	133.248	132.493	136.126	0	0	0	0	0	0	0	0	0	0	0	0	0	0	120.804	117.116	122.06	120.141	123.352	121.492	124.369	0.23975	0.231496	0.243401	0.239355	0.246849	0.24313	0.24725	8.06527	7.83408	8.17099	7.99384	8.20875	8.1314	8.32908	1.32129	1.28341	1.33891	1.30969	1.34509
DEU	10.6	Livestock, Other animals	10.1947	10.1947	9.71666	9.71666	10.5134	10.5134	10.5134	0	0	0	0	0	0	0	0	0	0	0	0	0	0	9.42698	9.42698	8.98561	8.98561	9.71876	9.71876	9.71876	0.0440212	0.0440212	0.0419603	0.0419603	0.0453863	0.0453863	0.0453863	0.0762625	0.0762625	0.0727039	0.0727039	0.0787452	0.0787452	0.0787452	0.0508417	0.0508417	0.0484693	0.0484693	0.0524968
DEU	10.7	Crops and pastures	0	0	0	0	0	0	0	0	0	0	0	0	0	0	0	0	0	0	0	0	0	78.3809	81.4717	74.9613	79.3172	76.9094	79.3979	89.1198	0	0	0	0	0	0	0	0	0	0	0	0	0	0	0	0	0	0	0
DEU	10.8	Agricultural waste burning	0	0	0	0	0	0	0	0	0	0	0	0	0	0	0	0	0	0	0	0	0	0	0	0	0	0	0	0	0	0	0	0	0	0	0	0	0	0	0	0	0	0	0	0	0	0	0
DEU	10.9	Rice cultivation	0	0	0	0	0	0	0	0	0	0	0	0	0	0	0	0	0	0	0	0	0	0	0	0	0	0	0	0	0	0	0	0	0	0	0	0	0	0	0	0	0	0	0	0	0	0	0
DEU	10.10	Storage and handling of agricultural products	0	0	0	0	0	0	0	0	0	0	0	0	0	0	0	0	0	0	0	0	0	0	0	0	0	0	0	0	0	0	0	0	0	0	0	0	0	0	0	0	0	0	0	0	0	0	0
DEU	10.11	Other agriculture	0	0	0	0	0	0	0	0	0	0	0	0	0	0	0	0	0	0	0	0	0	1.15952	1.11411	1.15017	1.12589	1.01077	0.927107	0.953457	0	0	0	0	0	0	0	18.5989	18.719	18.7245	18.6758	18.6926	18.7865	18.8084	0.715341	0.719961	0.720172	0.718299	0.718945
DNK	1.1	Power plants	14.3526	14.0289	12.3472	11.4445	9.52413	10.1147	8.81657	10.9549	10.1226	8.99444	9.28642	8.49445	8.53528	9.07892	3.29242	3.08367	2.59491	2.51039	2.08762	2.17904	1.93843	0.00808335	0.00866011	0.00881048	0.00913209	0.00932463	0.00966928	0.0091004	54.7926	43.2843	37.6041	41.8531	33.1571	24.266	19.7957	1.03352	0.814596	0.656115	0.754177	0.800359	0.666864	0.608094	0.846103	0.659318	0.528491	0.616734	0.649426
DNK	1.2	Refineries	0.00114	0.00138	0.00123	0.00089	0.00086	0.00385	0.00371	0.242147	0.237381	0.115942	0.118787	0.122039	0.118576	0.117545	3.70959	3.7339	3.55172	3.83772	3.76228	3.78517	3.99451	0	0	0	0	0	0	0	1.54335	1.48624	1.28405	1.51938	1.46672	1.42319	1.61015	0.119071	0.122366	0.104371	0.105402	0.110431	0.109689	0.106174	0.114536	0.117007	0.100918	0.102305	0.10658
DNK	2.1	Residential combustion (including commercial/institutional)	7.10897	7.31255	7.86785	8.23172	9.17232	8.3796	7.68362	90.9064	95.9051	108.06	115.292	137.903	128.507	119.571	13.6788	14.3248	16.0104	16.9735	19.9861	18.1882	16.5203	0.115411	0.1225	0.143066	0.158186	0.188623	0.183387	0.178054	6.6486	6.46908	6.9191	7.02907	7.34277	7.05704	7.00432	13.7582	14.493	16.3684	17.5129	21.1782	19.4405	17.7988	13.4638	14.1861	16.0067	17.1468	20.7445
DNK	2.2	Agricultural stationary combustion	2.29277	2.31274	2.091	1.66001	1.43409	1.29886	1.24435	7.90346	8.05377	8.25316	8.02001	8.34024	7.91846	7.44086	0.695208	0.700926	0.663868	0.593655	0.55152	0.505508	0.443594	0	0	0	0	0	0	0	1.26831	1.2432	1.14074	0.975183	0.815841	0.750946	0.70206	0.388915	0.385821	0.379923	0.366373	0.374501	0.367543	0.360521	0.360775	0.357361	0.350572	0.336483	0.344615
DNK	34.1	Iron and steel industry (including coke ovens)	0.07463	0.0764	0.07532	0.07192	0.0629	0.06411	0.06246	0.171747	0.177894	0.181376	0.186344	0.184186	0.18337	0.175553	0.0373862	0.038611	0.0395522	0.0404374	0.0400859	0.0398778	0.0379438	0	0	0	0	0	0	0	6.59463	6.80647	6.98242	7.12809	7.0674	7.03254	6.68618	0.0540131	0.056047	0.0540847	0.0489058	0.0462291	0.0499755	0.0221825	0.00922769	0.00957033	0.00930322	0.00855423	0.00814142
DNK	34.2	Non-ferrous metal industry	0.00277	0.00257	0.0018	0.00156	0.00113	0.00123	0.00128	0	0	0	0	0	0	0	0	0	0	0	0	0	0	0	0	0	0	0	0	0	0	0	0	0	0	0	0	0.0232542	0.0205788	0.027381	0.0315678	0.034968	0.0271425	0.002397	0.0107132	0.00966081	0.0127218	0.0146059	0.0161359
DNK	34.3	Chemical industry	0.15172	0.13405	0.10744	0.08007	0.04349	0.0477	0.04975	0	0	0	0	0	0	0	0.0254204	0.0314141	0.0257354	0.0252886	0.0239519	0.0239283	0.0180298	0.113	0.101	0.079	0.088	0.107	0.111	0.165	0.4746	0.3022	0.0302	0.037	0.018	0.019	0.018	0.267	0.163	0.018	0.01	0.02	0.021	0.013	0.201	0.122	0.014	0.007	0.015
DNK	34.4	Paper and pulp industry	0.08306	0.07764	0.07316	0.05574	0.02618	0.02855	0.02972	0	0	0	0	0	0	0	0	0	0	0	0	0	0	0	0	0	0	0	0	0	0	0	0	0	0	0	0	0	0	0	0	0	0	0	0	0	0	0	0
DNK	34.5	Cement industry	0	0	0	0	0	0	0	0	0	0	0	0	0	0	0	0	0	0	0	0	0	0	0	0	0	0	0	0	0	0	0	0	0	0	0	0	0	0	0	0	0	0	0	0	0	0	0
DNK	34.6	Other non-metallic minerals industry	0	0	0	0	0	0	0	0.199489	0.278356	0.274648	0.274284	0.349045	0.311147	0.18817	0.545663	0.561947	0.562401	0.562212	0.577516	0.570069	0.542479	0	0	0	0	0	0	0	0	0	0	0	0	0	0	0	0	0	0	0	0	0	0	0	0	0	0
DNK	34.7	Storage and handling in industry	0	0	0	0	0	0	0	0	0	0	0	0	0	0	0	0	0	0	0	0	0	0	0	0	0	0	0	0	0	0	0	0	0	0	0	0	0	0	0	0	0	0	0	0	0	0	0
DNK	34.8	Other industries	0.85009	0.89499	0.85074	0.75484	0.6141	0.64593	0.58855	11.7887	12.9024	12.0767	11.8903	13.4373	12.9513	10.3299	10.4905	9.99409	10.328	9.61174	8.23737	8.81017	8.86747	0.491437	0.52911	0.46674	0.432975	0.465277	0.485452	0.416752	12.7457	12.7433	12.3241	12.0683	10.5494	9.22826	6.76438	0.557346	0.557104	0.477686	0.547704	0.495584	0.505938	0.336187	0.350706	0.348924	0.301023	0.334168	0.301638
DNK	5.1	Coal production	0	0	0	0	0	0	0	0	0	0	0	0	0	0	0	0	0	0	0	0	0	0	0	0	0	0	0	0	0	0	0	0	0	0	0	0.570874	0.455655	0.361911	0.52129	0.487393	0.454197	0.40265	0.0570874	0.0455655	0.0361911	0.052129	0.0487393
DNK	5.2	Oil production	3.53087	4.17572	4.13212	5.16012	4.86924	4.81395	4.38705	0	0	0	0	0	0	0	10.5342	11.5281	10.8667	9.49033	8.40297	7.9686	5.83637	0	0	0	0	0	0	0	0	0	0	0	0	0	0	0	0	0	0	0	0	0	0	0	0	0	0
DNK	5.3	Gas production	1.79852	2.19025	2.22865	2.82886	2.71668	2.73725	2.54633	0	0	0	0	0	0	0	0.0775278	0.0984721	0.0949836	0.0994778	0.0669736	0.0412686	0.0341427	0	0	0	0	0	0	0	0	0	0	0	0	0	0	0	0	0	0	0	0	0	0	0	0	0	0
DNK	5.4	Gasoline distribution	0	0	0	0	0	0	0	0	0	0	0	0	0	0	2.09403	1.93291	1.74206	1.56324	1.40467	1.21591	1.17072	0	0	0	0	0	0	0	0	0	0	0	0	0	0	0	0	0	0	0	0	0	0	0	0	0	0
DNK	5.5	Flaring	0	0	0	0	0	0	0	0.278518	0.315981	0.258498	0.25427	0.232946	0.218102	0.13905	0.064386	0.0762051	0.0670476	0.0704249	0.0735568	0.0837697	0.062241	0	0	0	0	0	0	0	0.29802	0.331556	0.256399	0.248543	0.220741	0.190829	0.127876	0.00983528	0.0109301	0.00796556	0.00781476	0.00679021	0.0057883	0.00380925	0.00983528	0.0109301	0.00796556	0.00781476	0.00679021
DNK	6.1	Solvent and other product use	0	0	0	0	0	0	0	0.0417647	0.0596297	0.0254185	0.0290486	0.030866	0.0301496	0.037135	31.967	31.7604	30.9555	30.1965	27.0469	27.3768	27.3508	0	0	0	0	0	0	0	0	0	0	0	0	0	0	0.120015	0.171352	0.0730425	0.0834739	0.0886964	0.0866379	0.106711	0.0840104	0.119946	0.0511298	0.0584318	0.0620875
DNK	7.1	Road transport, light duty vehicles	1.20211	1.09891	0.981521	0.899229	0.8102	0.679585	0.559138	190.466	166.147	158.276	138.454	121.777	110.228	95.3174	19.4252	16.5999	15.2107	13.0536	11.441	10.2079	8.74701	2.60191	2.50441	2.28368	2.11248	1.96718	1.77938	1.59869	34.3689	32.5061	29.9885	28.1062	26.9959	24.7204	22.4293	1.46713	1.38383	1.3534	1.31631	1.2936	1.19792	1.05538	1.46713	1.38383	1.3534	1.31631	1.2936
DNK	7.2	Road transport, heavy duty vehicles	0.105317	0.0990807	0.0916087	0.0814992	0.0708217	0.0574685	0.0448718	9.22184	9.28081	9.10594	9.18539	8.62059	6.82644	5.17954	1.64868	1.59698	1.49971	1.46223	1.3418	1.03974	0.765156	0.01256	0.0129047	0.0128307	0.0133443	0.0139498	0.0132167	0.0115975	36.6946	36.5037	35.4231	35.5868	34.7055	29.7205	24.0626	0.928276	0.885344	0.823417	0.799578	0.735787	0.569157	0.420829	0.928276	0.885344	0.823417	0.799578	0.735787
DNK	7.3	Road transport, mopeds and motorcycles	0.141972	0.147052	0.1505	0.144351	0.137008	0.121986	0.10756	11.3949	11.0756	10.8116	10.7732	10.7995	10.4407	9.70156	3.46036	3.27365	3.09601	2.96591	2.87709	2.71952	2.48807	0.0011623	0.00117262	0.00120104	0.00126293	0.00134456	0.00135016	0.00128512	0.104348	0.111518	0.12152	0.135682	0.147107	0.149825	0.145086	0.0616687	0.0588587	0.0562303	0.0545395	0.0537178	0.051266	0.0472336	0.0616687	0.0588587	0.0562303	0.0545395	0.0537178
DNK	7.4	Road transport, gasoline evaporation	0	0	0	0	0	0	0	0	0	0	0	0	0	0	4.88472	4.11915	3.48362	2.95137	2.41318	1.95655	1.68497	0	0	0	0	0	0	0	0	0	0	0	0	0	0	0	0	0	0	0	0	0	0	0	0	0	0
DNK	7.5	Road transport, wear	0	0	0	0	0	0	0	0	0	0	0	0	0	0	0	0	0	0	0	0	0	0	0	0	0	0	0	0	0	0	0	0	0	0	0	1.52578	1.57446	1.58076	1.63515	1.71554	1.68348	1.57802	0.826266	0.852587	0.856204	0.885788	0.929653
DNK	8.1	Air transport (<1000m)	0.00504	0.0061	0.00695	0.00637	0.00659	0.00605	0.00974	1.47343	1.56431	1.56837	1.50923	1.59497	1.63455	1.5166	0.251722	0.279614	0.29055	0.285737	0.298711	0.290632	0.361232	0.000160963	0.000167632	0.000167533	0.000150116	0.000158625	0.0001534	0.000123596	1.53102	1.57739	1.60982	1.60227	1.71936	1.77676	1.58022	0.00640966	0.00655389	0.00666142	0.00656938	0.00698898	0.0071858	0.00641472	0.00640966	0.00655389	0.00666142	0.00656938	0.00698898
DNK	8.2	Rail transport	0.00857	0.00836	0.00904	0.00883	0.00886	0.00786	0.00668	0.610917	0.598797	0.648179	0.626398	0.628678	0.526118	0.450008	0.223013	0.217488	0.235243	0.229721	0.230557	0.204539	0.173868	0.000590007	0.00058434	0.000627353	0.000612877	0.000615108	0.000639713	0.000622166	3.53984	3.47838	3.72416	3.54219	3.55509	2.91997	2.60318	0.118596	0.114768	0.12376	0.119557	0.119992	0.101197	0.0843955	0.118596	0.114768	0.12376	0.119557	0.119992
DNK	8.3	Navigation, non-international	0	0	0	0	0	0	0	9.69792	9.52541	9.85186	9.38064	8.76032	8.62005	8.13305	0.598634	0.531637	0.508	0.475161	0.432082	0.429504	0.4031	0.00240713	0.002	0.002	0	0.000952225	0.000952225	0.000952225	15.5366	13.5698	15.12	14.8755	13.7638	15.1316	14.7114	0.322799	0.316834	0.328	0.31883	0.25997	0.262193	0.255181	0.318876	0.312997	0.324	0.314928	0.256833
DNK	8.4	Mobile machinery, agriculture	0	0	0	0	0	0	0	18.9751	17.2351	16.0383	15.8903	16.8398	17.4659	18.0292	2.46753	2.28613	2.21566	2.19384	2.19615	2.16438	2.06974	0.00283991	0.00294849	0.00305294	0.00324889	0.0035012	0.00369692	0.00381092	12.9713	12.6992	12.2421	11.7469	11.3871	10.946	10.5062	1.13493	1.07451	1.01022	0.95445	0.913584	0.869585	0.829717	1.13493	1.07451	1.01022	0.95445	0.913584
DNK	8.5	Mobile machinery, industry	0	0	0	0	0	0	0	7.84164	7.60033	7.49707	7.51519	7.38295	7.01001	5.12303	1.75449	1.6757	1.6198	1.58322	1.49765	1.357	0.97551	0.00220224	0.0022158	0.00230696	0.00247845	0.00264483	0.00269601	0.00200152	11.2136	10.7441	10.6643	10.8068	10.6667	9.97848	7.13738	1.07473	1.03666	1.00217	0.990835	0.937964	0.854138	0.587179	1.07473	1.03666	1.00217	0.990835	0.937964
DNK	8.6	Other mobile sources	0.00492	0.01183	0.01221	0.00559	0.00704	0.00402	0.00529	63.9837	73.3774	81.397	88.1169	92.7637	95.6743	97.9553	6.91465	7.78486	7.96485	8.08754	8.22383	7.99364	7.28558	0.000534098	0.000928807	0.000898633	0.000671186	0.000686401	0.000792255	0.000884755	0.726175	1.502	1.55695	0.879911	1.052	0.785386	1.00766	0.0843726	0.113953	0.110293	0.093994	0.0948381	0.0919494	0.0981235	0.0843726	0.113953	0.110293	0.093994	0.0948381
DNK	9.1	Landfills	52.2525	48.4073	48.5189	51.4387	50.646	50.3184	49.4904	0	0	0	0	0	0	0	0	0	0	0	0	0	0	0	0	0	0	0	0	0	0	0	0	0	0	0	0	0	0	0	0	0	0	0	0	0	0	0	0
DNK	9.2	Controlled waste incineration	0.00058	0.00059	0.00062	0.00069	0.00072	0.00073	0.00074	0	0	0	0	0	0	0	0	0	0	0	0	0	0	0	0	0	0	0	0	0	0	0	0	0	0	0	0	0	0	0	0	0	0	0	0	0	0	0	0
DNK	9.3	Other waste treatment	6.67843	6.48582	6.7371	6.92812	7.33559	7.0232	7.41211	1.44076	1.31078	1.37459	1.44261	1.56514	1.58594	1.61528	0.327027	0.28712	0.298402	0.312479	0.344792	0.353758	0.35073	0.492974	0.461753	0.493858	0.524226	0.583218	0.532534	0.592842	0.083414	0.0753799	0.0778638	0.0811329	0.0883535	0.0906925	0.0901866	0.0101471	0.0102737	0.0107516	0.0116509	0.0110275	0.0132234	0.0125935	0.0100455	0.0101481	0.010584	0.0114054	0.010745
DNK	10.1	Livestock, Cattle	142.266	137.085	136.177	135.538	140.216	141.381	146.285	0	0	0	0	0	0	0	0	0	0	0	0	0	0	23.4651	20.7203	19.1913	19.715	20.5548	21.1539	21.3838	0	0	0	0	0	0	0	0.63086	0.608856	0.615994	0.616856	0.615672	0.616093	0.626529	0.405884	0.391693	0.396265	0.396836	0.396169
DNK	10.2	Livestock, Poultry	2.30798	2.46432	2.69205	2.73594	3.16738	3.16695	3.2571	0	0	0	0	0	0	0	0	0	0	0	0	0	0	5.26957	5.50717	5.802	5.05833	4.00828	4.0923	3.91622	0	0	0	0	0	0	0	1.05849	0.99123	1.07745	0.996151	0.936951	0.893034	1.09626	0.162693	0.152548	0.167212	0.148594	0.141023
DNK	10.3	Livestock, Sheep	2.41929	2.48303	2.52431	2.55378	2.47478	2.34888	2.30953	0	0	0	0	0	0	0	0	0	0	0	0	0	0	0.175752	0.179912	0.181768	0.183861	0.163607	0.155283	0.152682	0	0	0	0	0	0	0	0.00202238	0.00207565	0.00211017	0.0021348	0.00206877	0.00196351	0.00193062	0.000596767	0.000612488	0.000622672	0.000629941	0.000610456
DNK	10.4	Livestock, Goats	0.1566	0.16791	0.17826	0.18938	0.19352	0.21916	0.24314	0	0	0	0	0	0	0	0	0	0	0	0	0	0	0.0141183	0.0150988	0.0159295	0.0169173	0.0155354	0.0180697	0.0200496	0	0	0	0	0	0	0	0.000167925	0.000180059	0.000191156	0.000203072	0.000211929	0.000236413	0.000262016	4.95518e-05	5.31321e-05	5.64066e-05	5.99227e-05	6.25364e-05
DNK	10.5	Livestock, Pigs	39.8308	41.3551	40.0055	39.2978	41.0355	39.3633	38.1213	0	0	0	0	0	0	0	0	0	0	0	0	0	0	36.0658	37.7316	34.7203	31.9972	31.3138	29.2258	27.3144	0	0	0	0	0	0	0	4.58295	4.65962	4.66773	4.59154	4.52694	4.13429	3.94056	0.747103	0.759678	0.760889	0.748431	0.738271
DNK	10.6	Livestock, Other animals	4.08557	4.20938	4.33318	4.45699	4.58054	4.70434	4.39484	0	0	0	0	0	0	0	0	0	0	0	0	0	0	6.69199	7.34974	7.9896	8.19435	8.43657	7.86772	8.74104	0	0	0	0	0	0	0	0.01485	0.0153	0.01575	0.0162	0.01665	0.0171	0.015975	0.0099	0.0102	0.0105	0.0108	0.0111
DNK	10.7	Crops and pastures	0	0	0	0	0	0	0	0	0	0	0	0	0	0	0	0	0	0	0	0	0	6.62958	6.67552	6.48018	6.42068	6.46643	6.85021	6.71986	0	0	0	0	0	0	0	0	0	0	0	0	0	0	0	0	0	0	0
DNK	10.8	Agricultural waste burning	1.689	1.689	1.689	1.689	1.689	1.689	1.689	0.0313159	0.0310529	0.0318	0.0299099	0.0284688	0.0284688	0.0288434	0.6512	0.6506	0.65	0.6506	0.6512	0.6518	0.6524	0.032	0.031	0.03	0.031	0.032	0.033	0.034	0.0324	0.0312	0.03	0.0312	0.0324	0.0336	0.0348	0.18886	0.18886	0.18886	0.18886	0.18886	0.18886	0.18886	0.16758	0.16758	0.16758	0.16758	0.16758
DNK	10.9	Rice cultivation	0	0	0	0	0	0	0	0	0	0	0	0	0	0	0	0	0	0	0	0	0	0	0	0	0	0	0	0	0	0	0	0	0	0	0	0	0	0	0	0	0	0	0	0	0	0	0
DNK	10.10	Storage and handling of agricultural products	0	0	0	0	0	0	0	0	0	0	0	0	0	0	0	0	0	0	0	0	0	0	0	0	0	0	0	0	0	0	0	0	0	0	0	0	0	0	0	0	0	0	0	0	0	0	0
DNK	10.11	Other agriculture	0	0	0	0	0	0	0	0	0	0	0	0	0	0	1.6361	1.5993	1.76529	1.79421	1.77891	1.86731	1.88013	6.11742	5.86043	5.6459	5.38673	5.30695	5.46919	5.46309	0	0	0	0	0	0	0	0	0	0	0	0	0	0	0	0	0	0	0
ESP	1.1	Power plants	2.71662	4.1098	4.75485	5.29863	5.52325	5.89474	5.54098	17.5788	19.3474	21.7794	20.8537	21.9071	18.8799	16.7688	6.80836	7.22413	7.87797	7.48172	7.49651	5.89454	5.04798	0.00059	0.001088	0.003583	0.0093625	0.010508	0.03067	0.014414	301.607	324.21	328.97	300.469	313.611	205.753	168.681	22.579	22.3868	21.9093	18.2433	18.9356	8.56503	5.01478	11.2885	11.0753	11.982	9.77192	10.916
ESP	1.2	Refineries	0.34806	0.36392	0.36092	0.35407	0.35943	0.36307	0.34754	4.07326	4.16224	4.1434	2.89225	2.90276	2.73866	2.92175	11.713	12.5732	12.5428	10.8601	11.1943	11.6608	9.94154	0	0	0	0	0	0	0	25.7967	27.424	25.4598	26.4282	25.8667	24.134	23.115	3.83108	3.93514	3.90608	3.92326	3.91374	3.50535	3.08875	3.11913	3.16986	3.15691	3.15727	3.14678
ESP	2.1	Residential combustion (including commercial/institutional)	31.3258	31.582	31.8436	31.9255	31.9843	31.8846	32.739	489.283	490.144	490.734	489.811	489.895	489.939	505.145	39.8566	39.9557	40.0488	40.0247	40.0535	40.0351	41.3051	0	0	0	0	0	0	0	27.2318	28.2559	29.003	27.4985	27.7653	27.7263	26.9152	24.9699	24.8352	24.7038	24.3504	24.2692	24.2642	24.9893	23.451	23.3499	23.2447	22.9433	22.8729
ESP	2.2	Agricultural stationary combustion	0.30231	0.29302	0.28306	0.27641	0.26503	0.25693	0.24484	2.83275	2.86544	2.86879	2.85984	2.86575	2.88609	2.89071	0.161694	0.162424	0.161203	0.160295	0.15993	0.159734	0.158058	0	0	0	0	0	0	0	20.8822	21.2575	21.3552	21.2911	21.4055	21.7515	21.9772	0.23052	0.211962	0.198391	0.196134	0.192614	0.192053	0.178984	0.208738	0.194198	0.183439	0.181584	0.178868
ESP	34.1	Iron and steel industry (including coke ovens)	4.05276	4.94741	5.55904	4.59623	3.44575	3.47153	2.51951	411.81	448.333	455.542	446.22	470.357	465.9	300.642	4.65844	5.14625	5.07769	4.92425	4.55084	4.40347	3.36419	0.403916	0.423065	0.400373	0.420127	0.407865	0.39561	0.287091	20.7913	23.1705	24.0415	22.3979	19.3177	20.8268	19.3558	7.99704	8.64997	8.41776	8.90799	9.06962	9.2718	7.57684	4.14301	4.46476	4.33206	4.56465	4.65283
ESP	34.2	Non-ferrous metal industry	0.57693	0.78536	0.8588	1.29242	0.1912	0.19513	0.1736	53.7713	54.7832	55.2162	56.2954	55.4261	55.756	49.5869	0.474955	0.544898	0.573326	0.719662	0.388634	0.370438	0.32365	0	0	0	0	0	0	0	5.15478	5.69739	5.96063	7.00786	5.01299	4.73095	4.21552	2.92577	2.43324	2.33967	2.23804	2.29248	2.24025	1.79701	1.59239	1.35964	1.25988	1.20845	1.22963
ESP	34.3	Chemical industry	7.80278	8.82902	9.17616	9.47675	8.66246	8.41824	7.69527	17.5932	19.4568	19.8626	20.3673	18.9673	20.5962	18.4422	18.0658	17.7325	17.0714	16.9793	16.481	14.4807	13.0217	14.7742	14.0105	13.8073	13.1095	14.3543	11.5889	8.34719	23.2569	25.3363	25.1522	24.5528	22.701	23.7404	21.3109	1.94761	1.74018	1.46859	1.33786	1.45413	1.53888	1.23911	1.40342	1.27046	1.08012	0.969081	1.05444
ESP	34.4	Paper and pulp industry	3.4333	2.70103	3.08959	3.21423	2.58629	2.46326	2.26198	15.1594	13.3261	13.8606	14.0859	13.8623	12.4143	13.4759	3.3245	3.02127	3.14782	3.19424	3.08908	2.90448	2.83793	0	0	0	0	0	0	0	23.0819	22.1607	22.4517	22.432	21.2748	21.7755	20.2441	2.63772	2.46743	2.52557	2.5598	2.64923	2.24369	1.8992	2.51465	2.36061	2.4255	2.46985	2.54639
ESP	34.5	Cement industry	0	0	0	0	0	0	0	0	0	0	0	0	0	0	0	0	0	0	0	0	0	0	0	0	0	0	0	0	0	0	0	0	0	0	0	0	0	0	0	0	0	0	0	0	0	0	0
ESP	34.6	Other non-metallic minerals industry	0	0	0	0	0	0	0	0.00251426	0.00289094	0.00285001	0.00296401	0.00323001	0.00286651	0.00303529	0.00873854	0.0092097	0.0076878	0.00757634	0.0080601	0.00734952	0.00753132	0	0	0	0	0	0	0	0	0	0	0	0	0	0	0	0	0	0	0	0	0	0	0	0	0	0
ESP	34.7	Storage and handling in industry	0	0	0	0	0	0	0	0	0	0	0	0	0	0	0	0	0	0	0	0	0	0	0	0	0	0	0	0	0	0	0	0	0	0	0	0	0	0	0	0	0	0	0	0	0	0	0
ESP	34.8	Other industries	14.4072	15.7106	17.1495	16.9994	19.3321	18.5341	17.4554	117.532	119.09	121.32	121.935	136.767	124.063	108.699	51.1917	57.9426	55.2185	59.9219	60.281	56.0318	52.9726	0.7	0.7	0.7	0.7	0.7	0.7	0.7	151.374	152.222	152.113	148.651	151.855	136.4	121.032	9.3964	8.90959	8.49943	8.27743	8.54481	7.98686	7.75656	6.65055	6.36396	6.16391	5.96969	6.22458
ESP	5.1	Coal production	49.6736	47.2201	44.7081	44.2711	42.0681	32.9634	29.7024	0	0	0	0	0	0	0	0	0	0	0	0	0	0	0	0	0	0	0	0	0	0	0	0	0	0	0	0	1.41575	1.35471	1.26113	1.38136	1.21144	1.07571	1.28269	0.155624	0.148786	0.13915	0.151044	0.132968
ESP	5.2	Oil production	80.0611	83.7308	85.1164	70.9064	65.8822	57.1438	54.7701	0	0	0	0	0	0	0	21.1719	20.6531	19.2176	18.9253	18.168	18.1683	16.1197	0	0	0	0	0	0	0	0	0	0	0	0	0	0	0	0	0	0	0	0	0	0	0	0	0	0
ESP	5.3	Gas production	4.27621	4.68467	5.01065	4.12584	3.786	3.2394	3.05802	0.0671171	0.0564813	0.0653656	0.0368078	0.0328492	0.0328492	0.0328492	4.61034	3.95412	4.21146	3.56065	3.83383	4.62151	4.45406	0	0	0	0	0	0	0	0.652419	0.547198	0.606897	0.340938	0.304398	0.304398	0.304398	0.00144352	0.00119184	0.00104966	0.00058095	0.000520049	0.00052005	0.000520049	0.00144352	0.00119184	0.00104966	0.00058095	0.000520049
ESP	5.4	Gasoline distribution	0	0	0	0	0	0	0	0	0	0	0	0	0	0	12.6931	9.73082	8.55595	7.97162	7.47031	6.82551	6.5628	0	0	0	0	0	0	0	0	0	0	0	0	0	0	0	0	0	0	0	0	0	0	0	0	0	0
ESP	5.5	Flaring	0	0	0	0	0	0	0	0.756452	0.786448	0.797333	0.809782	0.78884	0.801628	0.721847	2.515	2.93528	4.01793	0.894348	0.374355	0.460138	0.407047	0	0	0	0	0	0	0	3.34617	3.61752	3.06696	3.14538	3.01239	3.02775	2.76326	0.0171929	0.0180649	0.0181436	0.018311	0.0178829	0.0183558	0.0164758	0.0171929	0.0180649	0.0181436	0.018311	0.0178829
ESP	6.1	Solvent and other product use	0	0	0	0	0	0	0	0	0	0	0	0	0	0	487.553	500.975	500.351	490.641	491.695	465.727	398.998	0	0	0	0	0	0	0	0	0	0	0	0	0	0	0	0	0	0	0	0	0	0	0	0	0	0
ESP	7.1	Road transport, light duty vehicles	6.63523	5.94589	5.37278	4.73592	4.25953	3.5463	3.19052	603.403	515.708	434.594	348.206	297.865	238.671	191.135	73.6787	61.4534	51.3695	39.9461	33.1659	25.6254	19.4919	6.99343	6.74624	6.37719	5.72178	5.17551	4.62292	4.23768	253.196	241.644	235.284	228.265	226.265	209.001	196.19	13.1823	12.776	12.715	12.4044	12.4454	11.4626	10.5426	13.1823	12.776	12.715	12.4044	12.4454
ESP	7.2	Road transport, heavy duty vehicles	1.12657	1.08947	1.07288	0.947668	0.854472	0.713575	0.644459	59.0326	61.9523	61.9644	57.3132	52.6833	42.1386	35.0192	11.3503	11.0975	10.7955	9.46757	8.3521	6.57741	5.38186	0.107849	0.106114	0.107813	0.107463	0.111624	0.10778	0.0982528	262	286.197	279.172	266.627	259.706	228.417	195.622	6.73267	6.76125	6.31125	5.5565	4.88359	3.90177	3.21532	6.73267	6.76125	6.31125	5.5565	4.88359
ESP	7.3	Road transport, mopeds and motorcycles	1.29301	1.25498	1.24052	1.18131	1.15779	1.06151	1.06563	130.983	113.202	93.048	90.8592	87.3523	77.0401	85.2328	34.5917	30.3307	25.1499	24.7786	23.6871	20.7506	21.2149	0.0175799	0.0170317	0.020114	0.0241546	0.0282262	0.0283106	0.0349865	1.31488	1.31013	2.85604	3.22235	3.60231	3.42959	3.93215	0.715289	0.632369	0.452068	0.448935	0.430474	0.374555	0.373066	0.715289	0.632369	0.452068	0.448935	0.430474
ESP	7.4	Road transport, gasoline evaporation	0	0	0	0	0	0	0	0	0	0	0	0	0	0	24.0985	18.6175	14.2885	11.335	9.1614	7.37053	6.55827	0	0	0	0	0	0	0	0	0	0	0	0	0	0	0	0	0	0	0	0	0	0	0	0	0	0
ESP	7.5	Road transport, wear	0	0	0	0	0	0	0	0	0	0	0	0	0	0	0	0	0	0	0	0	0	0	0	0	0	0	0	0	0	0	0	0	0	0	0	9.87589	9.80064	10.177	10.5201	10.9342	10.4677	10.034	5.47375	5.45029	5.65529	5.84293	6.07371
ESP	8.1	Air transport (<1000m)	0.02938	0.03195	0.03265	0.03148	0.0275	0.02301	0.02134	6.0212	6.44639	6.6587	6.83959	7.09621	6.67127	5.94897	1.14886	1.233	1.23599	1.19614	1.09996	0.970934	0.855782	0	0	0	0	0	0	0	21.3241	24.1469	25.714	26.285	27.4802	25.7759	23.4821	0.0691601	0.0779606	0.083561	0.0868812	0.0916439	0.0856932	0.0754863	0.0691601	0.0779606	0.083561	0.0868812	0.0916439
ESP	8.2	Rail transport	0.01762	0.01739	0.01751	0.01742	0.01712	0.01648	0.01537	1.04754	1.03356	1.04071	1.03543	1.0177	0.979555	0.91366	0.455238	0.449163	0.452271	0.449978	0.44227	0.425695	0.397058	0.000685302	0.000676159	0.000680836	0.000677387	0.000665784	0.000640831	0.000597721	3.87686	3.82513	3.85159	3.83207	3.76643	3.62527	3.3814	0.321408	0.317119	0.319313	0.317694	0.312252	0.30055	0.280331	0.321408	0.317119	0.319313	0.317694	0.312252
ESP	8.3	Navigation, non-international	0	0	0	0	0	0	0	0.740288	0.739952	0.746655	0.787442	0.876025	0.882053	0.863713	1.19019	1.19575	1.218	1.29952	1.47051	1.48733	1.46042	0.00596437	0.00595622	0.006	0.00631441	0.00700265	0.00704485	0.0068948	55.7594	55.8081	56.452	59.7174	66.7362	67.2767	65.9265	2.63123	2.6728	2.777	3.03369	3.54879	3.5754	1.93835	2.62839	2.66991	2.774	3.03041	3.54495
ESP	8.4	Mobile machinery, agriculture	0	0	0	0	0	0	0	29.2996	28.5679	27.9335	27.685	26.2905	25.9085	25.5269	9.84788	9.43667	9.08384	8.83293	8.12391	7.77633	7.24299	0.0157444	0.0162719	0.0165941	0.0170818	0.0174161	0.017799	0.01824	83.1748	82.2432	80.2814	78.4605	75.5982	72.9012	70.5585	4.44314	4.25715	4.03395	3.86322	3.65811	3.46805	3.29696	4.44314	4.25715	4.03395	3.86322	3.65811
ESP	8.5	Mobile machinery, industry	0	0	0	0	0	0	0	15.7118	15.6606	15.5904	15.4048	14.7102	12.9025	10.8871	5.38698	5.25819	5.10443	4.88806	4.46297	3.72142	3.00492	0.00950533	0.0100383	0.0106685	0.0113243	0.0116998	0.0110187	0.0097128	45.5013	46.0757	46.777	47.1362	45.5379	40.0079	33.1514	3.29792	3.22347	3.13304	3.00646	2.76758	2.33675	1.91727	3.29792	3.22347	3.13304	3.00646	2.76758
ESP	8.6	Other mobile sources	0	0	0	0	0	0	0	0	0	0	0	0	0	0	0	0	0	0	0	0	0	0	0	0	0	0	0	0	0	0	0	0	0	0	0	0	0	0	0	0	0	0	0	0	0	0	0
ESP	9.1	Landfills	452.739	452.102	469.781	492.9	513.604	542.454	568.459	1.49831	1.3457	1.42572	1.27774	1.21647	1.20621	1.11014	0.389903	0.340938	0.333614	0.32629	0.307481	0.296963	0.2857	0	0	0	0	0	0	0	0.0804365	0.0722605	0.0766088	0.0686065	0.065323	0.0647865	0.0596035	0.00641879	0.00641254	0.00872579	0.00590882	0.00584699	0.00635233	0.00497915	0.00641879	0.00641254	0.00872579	0.00590882	0.00584699
ESP	9.2	Controlled waste incineration	0.03029	0.01612	0.01631	0.01675	0.03682	0.03629	0.02511	0.00739975	0.000292	0.000183875	0.000183875	0.000183875	0.000183875	0.000183875	0.0238552	0.0172864	0.0108854	0.0108854	0.0108854	0.0108854	0.0108854	0	0	0	0	0	0	0	0.025995	0.00584	0.0036775	0.0036775	0.0036775	0.0036775	0.0036775	0.0073356	0.0051392	0.0032362	0.0032362	0.0032362	0.0032362	0.0032362	0.00241068	0.00154176	0.00097086	0.00097086	0.00097086
ESP	9.3	Other waste treatment	125.329	127.961	130.618	136.156	141.444	143.534	144.687	1.25052	0.689251	0.702617	0.721798	1.51739	1.50018	1.05608	20.3093	20.142	19.7828	21.3611	23.1321	23.2029	24.1577	5.48192	6.51931	6.81631	7.15886	7.66089	8.89275	9.71698	0.20425	0.113804	0.116274	0.119449	0.247655	0.245106	0.173477	0.00764525	0.00788943	0.00883268	0.00907405	0.00873183	0.00940914	0.00940914	0.00679578	0.00701282	0.00785127	0.00806582	0.00776162
ESP	10.1	Livestock, Cattle	427.425	420.89	411.143	403.495	414.457	402.088	394.51	0	0	0	0	0	0	0	0	0	0	0	0	0	0	33.0951	33.7189	32.764	31.9284	32.5263	29.9868	27.3379	0	0	0	0	0	0	0	1.78707	1.76702	1.71814	1.68	1.72353	1.64793	1.59408	1.17912	1.16625	1.13411	1.1094	1.13891
ESP	10.2	Livestock, Poultry	3.50714	3.57252	3.33717	3.35412	3.90076	3.30686	3.15838	0	0	0	0	0	0	0	0	0	0	0	0	0	0	22.6448	22.9879	22.6266	22.2228	23.5215	22.4008	21.9132	0	0	0	0	0	0	0	7.12461	7.0459	6.97193	6.80904	7.25611	6.99931	6.83894	0.917227	0.905768	0.896498	0.875278	0.93313
ESP	10.3	Livestock, Sheep	211.228	201.279	199.86	198.501	197.334	178.95	178.76	0	0	0	0	0	0	0	0	0	0	0	0	0	0	2.34406	2.36311	2.43324	2.37559	2.30178	2.05987	2.00559	0	0	0	0	0	0	0	0	0	0	0	0	0	0	0	0	0	0	0
ESP	10.4	Livestock, Goats	16.3242	14.621	14.9791	15.2562	14.9185	15.2691	15.1477	0	0	0	0	0	0	0	0	0	0	0	0	0	0	0	0	0	0	0	0	0	0	0	0	0	0	0	0	0	0	0	0	0	0	0	0	0	0	0	0
ESP	10.5	Livestock, Pigs	248.97	254.624	252.337	267.739	273.605	259.989	260.837	0	0	0	0	0	0	0	0	0	0	0	0	0	0	60.097	61.8822	62.1295	64.6497	66.5536	63.7716	62.9879	0	0	0	0	0	0	0	10.1405	10.8156	10.8116	11.084	11.3866	10.8882	10.7284	1.66213	1.77298	1.77236	1.81717	1.86658
ESP	10.6	Livestock, Other animals	6.63262	6.87864	7.11678	7.38889	7.64698	9.63654	10.4718	0	0	0	0	0	0	0	0	0	0	0	0	0	0	0.826551	0.858053	0.889555	0.921056	0.952558	1.20061	1.30078	0	0	0	0	0	0	0	0.0680689	0.0706632	0.0732574	0.0758517	0.078446	0.0988735	0.107123	0.0453793	0.0471088	0.0488383	0.0505678	0.0522973
ESP	10.7	Crops and pastures	0	0	0	0	0	0	0	0	0	0	0	0	0	0	0	0	0	0	0	0	0	238.928	230.548	214.63	224.134	229.213	206.554	213.423	0	0	0	0	0	0	0	0.971389	0.956728	0.939158	0.880815	0.875691	0.916554	0.916554	0.971389	0.956728	0.939158	0.880815	0.875691
ESP	10.8	Agricultural waste burning	25.5786	23.6448	21.711	21.6998	21.6886	21.6774	21.6662	0.214081	0.242118	0.1542	0.187153	0.221445	0.221445	0.208105	27.15	25.095	23.04	23.03	23.02	23.01	23	3.9116	3.6158	3.32	3.3184	3.3168	3.3152	3.3136	4.1172	3.8036	3.49	3.49	3.49	3.49	3.49	21.3655	19.7502	18.1348	18.1256	18.1163	18.1071	18.0979	18.9581	17.5248	16.0915	16.0833	16.0751
ESP	10.9	Rice cultivation	14.1853	14.7158	14.298	12.7842	12.1949	11.454	11.454	0	0	0	0	0	0	0	0	0	0	0	0	0	0	0	0	0	0	0	0	0	0	0	0	0	0	0	0	0	0	0	0	0	0	0	0	0	0	0	0
ESP	10.10	Storage and handling of agricultural products	0	0	0	0	0	0	0	0	0	0	0	0	0	0	0	0	0	0	0	0	0	0	0	0	0	0	0	0	0	0	0	0	0	0	0	0	0	0	0	0	0	0	0	0	0	0	0
ESP	10.11	Other agriculture	0	0	0	0	0	0	0	0	0	0	0	0	0	0	0	0	0	0	0	0	0	0	0	0	0	0	0	0	0	0	0	0	0	0	0	0	0	0	0	0	0	0	0	0	0	0	0
FIN	1.1	Power plants	1.2988	1.13539	0.92912	1.14736	1.04139	0.97795	0.91499	19.359	13.869	12.474	14.356	11.9479	13.6284	11.698	0.19	0.883	0.755	1.228	1.111	1.35429	1.21406	0.013	0.018	0.011	0.008	3e-05	3e-05	0.00714	58.027	49.363	31.576	50.101	47.658	35.7811	35.6376	2.599	2.824	1.744	2.541	2.52157	2.02825	1.70367	0.996	1.112	0.804	0.907	0.875154
FIN	1.2	Refineries	0.0424	0.04229	0.04173	0.04375	0.04597	0.0459	0.04741	0.559	0.578	0.625	0.776	1.06678	1.02613	1.12021	4.61	3.975	3.712	3.854	3.936	3.60049	3.44365	0	0	0	0	0	0	0	3.15	3.176	2.657	3.29	3.575	3.04821	3.8926	0.105	0.122	0.173	0.184	0.114603	0.0944523	0.169896	0.047	0.049	0.069	0.069	0.0230552
FIN	2.1	Residential combustion (including commercial/institutional)	9.87328	9.91479	9.91039	10.1962	10.2653	10.023	10.8596	98.066	92.991	92.122	93.906	92.8123	105.846	115.177	26.832	26.56	25.268	25.665	25.382	29.1489	31.663	0	0	0	0	0	3.44346e-05	3.48183e-05	11.608	8.64	8.646	9.03	8.596	8.64291	9.4255	18.601	18.116	16.562	16.851	16.658	19.0225	20.6791	17.562	17.22	15.576	15.89	15.7251
FIN	2.2	Agricultural stationary combustion	0.47649	0.47388	0.4731	0.4633	0.47114	0.47343	0.50448	10.461	10.471	10.573	0.093	11.0611	10.5997	11.7038	3.05	3.055	1.137	0.017	1.185	1.1346	1.25497	0	0	0	0	0.001	0	0	1.632	1.651	1.483	0.269	1.452	1.28972	1.51046	2.294	2.308	0.724	0.055	0.779513	0.745108	0.771378	2.119	2.128	0.2	0.032	0.22502
FIN	34.1	Iron and steel industry (including coke ovens)	0.47804	0.48283	0.47818	0.46717	0.46018	0.45801	0.3918	6.984	7.667	7.733	7.273	7.41156	9.64008	7.21348	0.179	0.255	0.218	0.209	1.031	0.918753	0.590472	0	0	0	0	0	0	0.00022	2.868	3.103	2.912	3.048	3.603	4.25017	3.44979	0.364	0.316	0.301	0.276	1.09262	1.36535	0.860014	0.207	0.161	0.126	0.102	0.505704
FIN	34.2	Non-ferrous metal industry	0.00156	0.00143	0.00124	0.00126	0.00132	0.00134	0.00116	0.703	0.819	0.821	0.965	0.225515	0.233182	0.162837	1.108	0.911	1.023	0.974	0.07	0.100595	0.0648253	0.678	0.678	1.195	0.428	0.377	0.38933	0.19314	2.369	1.665	1.276	1.464	0.557	0.291154	0.230262	1.721	1.916	1.453	1.606	0.0327989	0.0245164	0.0186893	1.166	0.969	1.002	0.732	0.0191979
FIN	34.3	Chemical industry	0.02547	0.02459	0.02649	0.01759	0.01784	0.01889	0.01354	0.659	0.686	0.607	0.405	0.416629	0.422545	0.340332	3.969	3.241	2.686	3.066	2.29	2.74585	2.39011	0.168	0.177	0.141	0.194	0.344	0.20602	0.48809	2.785	2.966	2.554	2.488	2.734	2.6543	1.90909	0.277	0.264	0.231	0.198	0.177706	0.174681	0.202528	0.166	0.134	0.129	0.119	0.0973126
FIN	34.4	Paper and pulp industry	0.31483	0.33854	0.3013	0.34692	0.34353	0.31962	0.26572	24.485	26.177	24.364	27.889	27.95	23.2852	16.3661	3.273	4.361	3.885	3.412	5.39	2.9235	2.22476	0.085	0.269	0.188	0.232	0.083	0.0826	0.1578	18.341	19.83	17.588	20.808	19.978	19.3176	15.095	3.77	5.512	4.68	4.144	3.87326	2.92351	1.95788	3.066	4.321	3.741	2.988	2.80113
FIN	34.5	Cement industry	0	0	0	0	0	0	0	0	0	0	0	0	0	0	0.116	0.111	0.124	0.044	0.033	0.0225958	0.0138777	0	0	0	0	0	0	0	0	0.717	0.743	1.066	0.756	0.298171	0.325468	0	0	0.001	0	0	0	0	0	0	0.001	0	0
FIN	34.6	Other non-metallic minerals industry	0	0	0	0	0	0	0	0	0	0	0.09	0.585887	0.367743	0.249535	1.062	0.758	0.775	0.682	0.914	0.814875	0.713872	0	0	0	0	0	0	0	0.014	0.049	0.055	0.171	0.456	0.0994556	0.0741987	0.083	0.103	0.099	0.121	0.660498	1.25099	1.08098	0.066	0.071	0.075	0.076	0.131852
FIN	34.7	Storage and handling in industry	0	0	0	0	0	0	0	0.006	0.005	0.423	0.522	0.328775	0.246662	0	0.443	0.077	0.101	0.095	0.138	0.166942	0.110441	0.012	0.007	0	0.1	0	0	0	0.276	0.399	0.559	0.374	0.229	0.178878	0.126876	1.386	1.245	1.034	1.901	0.307606	0.30487	0.21933	0.194	0.172	0.144	0.265	0.0266036
FIN	34.8	Other industries	0.29876	0.29716	0.29417	0.31631	0.26919	0.25299	0.21623	16.89	30.513	24.668	25.698	12.2553	12.3119	10.6776	3.761	3.758	3.548	3.396	1.729	2.94398	2.53047	0	0.008	0.007	0.002	0	0.00014	9e-05	17.382	19.764	19.02	17.881	5.67	6.84594	4.43202	2.25	3.592	2.203	1.936	2.79335	2.04803	1.87533	1.41	1.854	1.33	1.148	1.48522
FIN	5.1	Coal production	0	0	0	0	0	0	0	0	0	0	0	0	0	0	0	0	0	0	0	0	0	0	0	0	0	0	0	0	0	0	0	0	0	0	0	3.323	1.719	3.602	6.221	3.9955	7.62705	7.62555	2.426	1.255	2.629	4.541	2.80583
FIN	5.2	Oil production	0	0	0	0	0	0	0	0	0	0	0	0	0	0	0.018	0.017	0.017	0.018	0.022	0	0	0	0	0	0	0	0	0	0	0	0	0	0	0	0	0	0	0	0	0	0	0	0	0	0	0	0
FIN	5.3	Gas production	0.29201	0.29789	0.3057	0.31258	0.32112	0.32117	0.30296	24.406	24.962	33.882	37.111	0	0	0.0069084	4.034	4.082	6.495	12.43	0	0	0.00034542	0	0	0.001	0.001	0	0	0	5.055	4.709	4.514	4.377	0	0	0.02327	0.88	0.861	0.781	0.683	0	0	0	0.814	0.796	0.724	0.632	0
FIN	5.4	Gasoline distribution	0	0	0	0	0	0	0	0	0	0	0	0	0	0	3.614	4.103	4.228	4.191	3.962	3.79136	3.68057	0	0	0	0	0	0	0	0.003	0	0	0	0	0	0	0.006	0	0	0	0	0	0	0.006	0	0	0	0
FIN	5.5	Flaring	0	0	0	0	0	0	0	0	0	0	0	0	0	0	0	0	0	0	0	0	0	0	0	0	0	0	0	0	0	0	0	0	0	0	0	0	0	0	0	0	0	0	0	0	0	0	0
FIN	6.1	Solvent and other product use	0	0	0	0	0	0	0	2.859	0	0	0	5.05157	3.80554	4.18338	29.307	29.455	27.225	27.636	27.347	23.5335	21.6298	0.147	0.208	0.235	0.186	0.229	0.21473	0.12354	1.024	0	0	0	0.354	0.0204288	0.124034	1.273	1.518	1.481	1.423	0.399934	0.452347	0.353566	1.264	1.499	1.399	1.393	0.364019
FIN	7.1	Road transport, light duty vehicles	1.88038	1.70314	1.52517	1.36699	1.25126	1.13883	1.08933	266.882	246.714	222.928	197.455	186.59	168.981	164.306	26.647	23.787	20.928	17.847	16.421	14.2718	13.4063	0	0	2.588	2.703	2.805	2.73642	2.70593	38.937	35.804	32.704	29.548	27.516	25.2211	24.3383	2.192	2.029	1.906	1.755	1.69214	1.67329	1.67571	1.919	1.776	1.67	1.538	1.48214
FIN	7.2	Road transport, heavy duty vehicles	0.184974	0.173522	0.162049	0.146976	0.13644	0.126304	0.123359	6.362	6.178	6.049	5.847	5.94748	5.74881	5.38429	3.61	3.544	3.515	3.462	3.495	3.31803	3.05774	0	0	0.011	0.011	0.012	0.0116687	0.010783	27.087	25.518	24.529	23.517	22.996	21.9053	19.9228	1.16	1.031	0.944	0.862	0.849283	0.776888	0.70567	1.016	0.903	0.827	0.755	0.743885
FIN	7.3	Road transport, mopeds and motorcycles	0.188757	0.180167	0.171582	0.160592	0.154481	0.14894	0.152457	13.467	14.028	14.5	15.167	15.724	15.925	15.4804	2.494	2.585	2.66	2.768	2.868	2.86768	2.8887	0	0	0.002	0.002	0.002	0.00262109	0.00271694	0.15	0.17	0.19	0.208	0.226	0.242314	0.241909	0.013	0.014	0.015	0.016	0.0169874	0.017578	0.0176422	0.012	0.012	0.013	0.014	0.0148792
FIN	7.4	Road transport, gasoline evaporation	0	0	0	0	0	0	0	0	0	0	0	0	0	0	8.124	7.162	6.265	5.401	4.789	4.222	3.93	0	0	0	0	0	0	0	0	0	0	0	0	0	0	0	0	0	0	0	0	0	0	0	0	0	0
FIN	7.5	Road transport, wear	0	0	0	0	0	0	0	0	0	0	0	0	0	0	0	0	0	0	0	0	0	0	0	0	0	0	0	0	0	0	0	0	0	0	0	8.553	8.133	8.881	8.991	8.23077	8.24825	8.31748	1.687	1.607	1.752	1.773	4.45955
FIN	8.1	Air transport (<1000m)	0.01407	0.01378	0.01346	0.01174	0.01075	0.01076	0.01002	1.913	1.766	1.777	2.163	2.845	2.77142	2.545	0.142	0.137	0.133	0.121	0.194	0.191947	0.178	0	0	0	0	0	0	0	1.166	1.188	1.079	1.017	1.483	1.52956	1.402	0.045	0.046	0.045	0.045	0.062	0.0615995	0.056	0.045	0.046	0.045	0.045	0.062
FIN	8.2	Rail transport	0.00758	0.00773	0.00697	0.00707	0.00574	0.00614	0.00486	0.399	0.412	0.383	0.39	0.325289	0.343776	0.273492	0.163	0.169	1.16	0.161	0.142	0.147844	0.118991	0	0	0	0	0	0.000288412	0.000232286	2.915	3.043	2.876	2.907	2.511	2.67889	2.15237	0.065	0.066	0.06	0.062	0.0504164	0.0520912	0.0410845	0.057	0.058	0.053	0.054	0.0441596
FIN	8.3	Navigation, non-international	0	0	0	0	0	0	0	26.6253	25.9207	26.59	27.764	28.3071	23.8741	24.3154	0.895978	0.9383	0.942	0.987542	0.946805	0.548158	0.535875	0	0	0.001	0.001	0.001	0.00131832	0.0013633	9.61241	8.93728	9.315	9.66209	9.82223	8.57584	8.97563	0.492607	0.46943	0.461	0.482001	0.500131	0.336556	0.352692	0.383628	0.366419	0.359	0.375665	0.389399
FIN	8.4	Mobile machinery, agriculture	0	0	0	0	0	0	0	15.39	15.433	9.942	18.334	6.96919	5.91221	6.29712	5.162	5.129	3.663	3.955	2.645	1.58537	1.46595	0	0	0.002	0.001	0.001	0.00127007	0.00123072	11.84	11.327	10.284	8.875	7.268	6.71712	6.18194	1.22	1.155	0.649	1.101	0.371039	0.324192	0.308626	1.129	1.068	0.601	0.556	0.343355
FIN	8.5	Mobile machinery, industry	0	0	0	0	0	0	0	0	0	0	0	6.9943	6.69733	5.19623	0	0	0	0	1.609	1.51326	1.06992	0	0	0	0	0.002	0.0016552	0.00134918	0	0	0	0	10.584	10.2104	7.84856	0	0	0	0	0.644488	0.599227	0.439812	0	0	0	0	0.596402
FIN	8.6	Other mobile sources	0.00748	0.00528	0.00723	0.00644	0.00662	0.007	0.00715	27.627	31.69	31.617	34.818	76.477	73.9656	62.7985	2.388	2.488	2.344	1.898	12.64	10.791	8.03134	0	0	0	0	0.001	0.0012101	0.00106072	0.376	0.684	0.816	0.625	4.952	4.78214	3.9207	0.043	0.044	0.051	0.036	0.658692	0.607563	0.49176	0.04	0.041	0.049	0.035	0.609546
FIN	9.1	Landfills	114.341	107.731	97.6078	100.435	95.7791	91.4267	88.054	0	0	0	0	0	2.78e-05	3.7e-05	0.768	0.165	0.13	0.138	0.133	0.119277	0.118997	0	0	0	0	0	0	0	0	0	0	0	0	0	0	0	0	0	0	0	4.865e-06	6.475e-06	0	0	0	0	0
FIN	9.2	Controlled waste incineration	0	0	0	0	0	0	0	0.023	0.016	0.122	0.011	0.0197584	0.0131678	0.126733	0.002	0.001	0.02	0.006	0.05	0.0940319	0.113413	0	0	0	0	0	0	0	0.233	0.249	0.236	0.21	0.216	0.317369	0.317148	0.012	0.018	0.016	0.015	0.00439224	0.0082251	0.0102042	0.009	0.014	0.012	0.012	0.00275569
FIN	9.3	Other waste treatment	8.85421	8.94874	9.10423	9.02046	9.24996	9.06103	8.74837	0	0	0	0	0	0	0	1.25	0.27	0.306	0.323	0.382	0.363885	0.324026	0	0	0	0	0.13052	0.11448	0.12264	0	0	0	0	0	0	0	0	0	0	0	1.24467e-06	4.61535e-07	4.96067e-07	0	0	0	0	1.24467e-06
FIN	10.1	Livestock, Cattle	43.7601	43.4622	43.0692	42.4028	41.3232	40.4668	40.9393	0	0	0	0	0	0	0	0	0	0	0	0	0	0	18.798	18.221	17.989	17.717	19.6186	19.4496	19.6456	0	0	0	0	0	0	0	0.43	0.214	0.208	0.207	0.189474	0.187583	0.188825	0.077	0.139	0.135	0.134	0.1228
FIN	10.2	Livestock, Poultry	44.2927	43.6313	43.8559	44.2112	44.1523	44.5793	44.1099	0	0	0	0	0	0	0	0	0	0	0	0	0	0	1.358	1.991	1.994	1.967	2.62798	2.74905	2.51456	0	0	0	0	0	0	0	0.55	2.042	2.008	1.97	0.458078	0.515364	0.447085	0.097	0.265	0.261	0.256	0.0618778
FIN	10.3	Livestock, Sheep	0.73668	0.826	0.75252	1.00157	1.02316	1.04862	1.00962	0	0	0	0	0	0	0	0	0	0	0	0	0	0	0.413	0.457	0.377	0.49	0.249	0.25542	0.246043	0	0	0	0	0	0	0	0	0	0	0	0	0	0	0	0	0	0	0
FIN	10.4	Livestock, Goats	0.03458	0.03721	0.03553	0.03413	0.03163	0.03028	0.03031	0	0	0	0	0	0	0	0	0	0	0	0	0	0	0.028	0.031	0.029	0.028	0.0129112	0.0123679	0.0123865	0	0	0	0	0	0	0	0	0	0	0	0	0	0	0	0	0	0	0
FIN	10.5	Livestock, Pigs	2.06235	2.0469	2.10165	2.15468	2.17206	2.22414	2.07181	0	0	0	0	0	0	0	0	0	0	0	0	0	0	5.79	5.685	5.871	5.848	6.28835	6.31718	6.12417	0	0	0	0	0	0	0	0.605	0.319	0.33	0.328	0.362622	0.363975	0.347206	0.108	0.052	0.054	0.053	0.0590934
FIN	10.6	Livestock, Other animals	1.02553	1.04221	1.08786	1.12548	1.15359	1.17395	1.22145	0	0	0	0	0	0	0	0	0	0	0	0	0	0	4.217	4.143	4.202	5.1	3.6465	3.36904	2.73547	0	0	0	0	0	0	0	0	0.16	0.059	0.061	0.00777995	0.0079344	0.00827191	0	0.014	0.013	0.015	0.00518663
FIN	10.7	Crops and pastures	0	0	0	0	0	0	0	0	0	0	0	0	0	0	0	0	0	0	0	0	0	1.471	1.422	1.375	1.362	1.88063	1.88361	1.57262	0	0	0	0	0	0	0	0.482	0.456	0.48	0.465	0.457579	0.482773	0.458185	0.098	0.092	0.097	0.094	0.0925341
FIN	10.8	Agricultural waste burning	0.562	0.562	0.562	0.562	0.562	0.562	0.562	0.0107704	0.0105789	0.0114	0.010614	0.0114132	0.0114132	0.0117551	0.1532	0.1516	0.15	0.1516	0.1532	0.1548	0.1564	0	0	0	0	0	0	0	0	0	0	0	0	0	0	0	0	0	0	0	0	0	0	0	0	0	0
FIN	10.9	Rice cultivation	0	0	0	0	0	0	0	0	0	0	0	0	0	0	0	0	0	0	0	0	0	0	0	0	0	0	0	0	0	0	0	0	0	0	0	0	0	0	0	0	0	0	0	0	0	0	0
FIN	10.10	Storage and handling of agricultural products	0	0	0	0	0	0	0	0	0	0	0	0	0	0	0	0	0	0	0	0	0	0	0	0	0	0	0	0	0	0	0	0	0	0	0	0	0	0	0	0	0	0	0	0	0	0	0
FIN	10.11	Other agriculture	0	0	0	0	0	0	0	0	0	0	0	0	0	0	0	0	0	0	0	0	0	0	0	0	0	0	0	0	0	0	0	0	0	0	0	0	0	0	0	0.110057	0.110369	0.111764	0	0	0	0	0.0173507
FRA	1.1	Power plants	1.18824	1.32787	1.49923	1.49094	1.40969	1.43407	1.44079	15.698	15.5191	16.3838	15.2832	15.4194	15.6675	15.7449	1.11219	1.00042	1.07488	0.826862	0.695619	0.704711	0.706914	0.0254228	0.0313667	0.043082	0.0667802	0.0851344	0.152793	0.183492	108.259	102.606	122.179	99.2176	92.3153	69.3739	67.7197	6.48772	6.10279	7.12906	6.12783	5.703	4.12509	3.92656	3.96173	3.52447	4.02998	3.4502	3.17243
FRA	1.2	Refineries	0.29537	0.30427	0.30887	0.29711	0.29916	0.3076	0.27095	20.1623	20.7817	18.3683	20.9904	20.8827	24.5893	28.2047	9.94849	9.47142	8.67581	8.75352	11.4048	7.47504	6.47401	0	0	0	0	0	0	0	22.1339	21.7	23.7978	23.9242	22.4769	21.9552	21.2953	3.4217	3.46626	3.12733	3.01983	2.85482	2.25557	2.00704	2.183	2.21194	1.99791	1.92442	1.82124
FRA	2.1	Residential combustion (including commercial/institutional)	111.498	106.332	98.2846	85.2596	75.4436	73.5583	69.0572	1643.98	1602.26	1532.05	1404.95	1298.28	1319.27	1303.29	308.359	291.656	267.468	230.225	202.564	195.523	182.82	0	0	0	0	0	0	0	102.155	107.72	108.38	101.128	95.1793	100.483	98.2669	136.83	130.897	122.517	108.666	98.73	98.0706	94.9257	134.103	128.282	120.067	106.505	96.7694
FRA	2.2	Agricultural stationary combustion	0.79277	0.80471	0.80066	0.77992	0.77561	0.79049	0.76478	1.14492	1.23159	1.1752	1.10783	1.12183	1.09211	1.02833	0.107552	0.119528	0.111135	0.102247	0.105747	0.102881	0.0933063	0	0	0	0	0	0	0	2.61182	2.81981	2.68447	2.5228	2.5564	2.48506	2.33198	0.233337	0.236457	0.234427	0.232002	0.232506	0.231436	0.22914	0.220377	0.223497	0.221467	0.219042	0.219546
FRA	34.1	Iron and steel industry (including coke ovens)	4.994	6.63689	5.00852	3.31164	5.38678	3.63173	1.8561	1525.8	1803.44	1667.52	1504.47	1523.84	1480.25	1127.97	6.89553	6.64817	6.77874	6.8059	6.58705	5.77096	4.53981	0	0	0	0	0	0	0	25.2148	26.0773	26.0188	26.8744	26.5525	25.5189	17.0301	7.8103	8.13264	7.2827	7.7081	6.606	6.52628	5.66729	5.37176	5.70271	5.13856	5.45579	4.66556
FRA	34.2	Non-ferrous metal industry	0.13333	0.10212	0.14328	0.11109	0.10685	0.13059	0.10193	18.6911	18.4484	19.1531	18.5981	17.7893	16.2236	14.4453	0.342677	0.310353	0.364549	0.261943	0.322361	0.243591	0.232562	0	0	0	0	0	0	0	2.11428	1.82135	2.38587	1.84663	1.70974	1.946	1.64344	0.77085	0.532622	0.800644	0.552125	0.588364	0.394102	0.288223	0.396117	0.272968	0.431288	0.281692	0.307272
FRA	34.3	Chemical industry	6.85275	5.73353	5.13025	4.5391	4.42848	4.06249	3.70385	11.4241	11.3195	12.1037	13.1306	14.4167	11.7297	9.24228	44.9619	41.8395	38.0124	31.7601	25.3266	24.802	19.2397	3.35556	3.15305	3.11758	2.1229	2.66218	2.42655	1.76264	33.3209	32.5175	34.5341	31.0778	31.422	27.7402	25.1991	1.85418	2.5469	3.17888	2.75277	2.91232	2.17361	1.32637	1.16072	1.79247	2.38283	1.96001	1.98478
FRA	34.4	Paper and pulp industry	1.56336	1.52008	1.52629	1.47753	1.46668	1.43939	1.19425	8.06557	8.04422	8.14635	8.76917	9.7553	10.6193	10.1799	1.57564	1.91803	1.9542	2.05591	1.93034	1.8062	1.73094	0	0	0	0	0	0	0	11.6361	12.0188	11.4868	12.3698	12.6947	11.2368	11.2677	3.46794	3.66906	3.72098	3.70524	3.90799	4.18583	4.35196	2.45313	2.46472	2.48834	2.43044	2.66723
FRA	34.5	Cement industry	0	0	0	0	0	0	0	0	0	0	0	0	0	0	0	0	0	0	0	0	0	0	0	0	0	0	0	0	0	0	0	0	0	0	0	0	0	0	0	0	0	0	0	0	0	0	0
FRA	34.6	Other non-metallic minerals industry	0	0	0	0	0	0	0	15.679	21.093	26.285	24.302	20.5194	23.3112	21.824	23.76	24.624	23.76	24.624	25.344	24.192	23.688	2.1185	1.93173	1.922	1.513	1.47712	1.66004	1.33272	0	0	0	0	0	0	0	96.3344	97.0752	90.7093	92.9444	91.6764	87.9194	79.5004	52.9658	53.8753	51.8813	53.7812	54.2435
FRA	34.7	Storage and handling in industry	0	0	0	0	0	0	0	0	0	0	0	0	0	0	0	0	0	0	0	0	0	0	0	0	0	0	0	0	0	0	0	0	0	0	0	0	0	0	0	0	0	0	0	0	0	0	0
FRA	34.8	Other industries	3.06157	2.77886	2.63171	2.67471	2.67041	2.53788	2.50315	64.022	65.545	62.3082	72.7198	72.8669	68.0089	59.4985	37.0271	38.4193	37.9267	38.3025	38.9478	38.0745	38.0806	1.20446	1.28759	0.914663	0.975552	1.09973	1.27239	1.00468	77.3968	76.9596	72.1293	71.4174	73.8034	71.104	65.1354	25.093	25.1592	24.9743	25.4816	26.8449	26.625	26.0281	19.0455	19.1208	19.0694	19.4769	20.2646
FRA	5.1	Coal production	47.3146	28.149	15.589	10.8655	2.88361	2.8961	2.4679	0	0	0	0	0	0	0	0	0	0	0	0	0	0	0	0	0	0	0	0	0	0	0	0	0	0	0	0	5.26047	0.484	0	0	0	0	0	4.40802	0.405568	0	0	0
FRA	5.2	Oil production	106.618	86.7145	71.2871	66.3348	58.9922	59.4051	52.0877	0	0	0	0	0	0	0	3.76953	3.80352	4.13888	4.54242	3.8183	4.30629	3.75366	0	0	0	0	0	0	0	0	0	0	0	0	0	0	0	0	0	0	0	0	0	0	0	0	0	0
FRA	5.3	Gas production	1.60639	1.43875	1.55551	1.01454	0.976029	0.883895	0.875646	0.235281	0.296505	0.322701	0.255181	0.218067	0.355303	0.225185	9.40546	9.62027	9.39674	9.00597	8.8588	8.90499	7.8453	0	0	0	0	0	0	0	2.91427	3.81187	3.87255	2.69132	1.2402	1.1696	0.945595	0.0105876	0.0133427	0.0145216	0.0114832	0.00981301	0.00993281	0.00959002	0.0105876	0.0133427	0.0145216	0.0114832	0.00981301
FRA	5.4	Gasoline distribution	0	0	0	0	0	0	0	0	0	0	0	0	0	0	25.9363	23.8592	22.0961	20.7875	20.1404	19.1189	18.1255	0	0	0	0	0	0	0	0	0	0	0	0	0	0	0	0	0	0	0	0	0	0	0	0	0	0
FRA	5.5	Flaring	0	0	0	0	0	0	0	0	0	0	0	0	0.360491	0.544359	0.11603	0.177073	0.186868	0.298777	0.243391	0.244423	0.366635	0	0	0	0	0	0	0	0.103463	0.104213	0.16107	0.542085	0.49488	0.18242	0.404734	0.00812461	0.00703528	0.0122899	0.0200636	0.0151807	0.0995328	0.105606	0.00812461	0.00703528	0.0122899	0.0200636	0.0151807
FRA	6.1	Solvent and other product use	0	0	0	0	0	0	0	0.0096014	0.00793305	0.0079056	0.00801882	0.0078912	0.00773358	0.00788901	471.184	450.135	440.048	422.26	411.111	386.987	356.798	0	0	0	0	0	0	0	0.00027545	0.000227587	0.0002268	0.000230048	0.000226387	0.000221865	0.000226324	2.50538	2.52593	2.51998	2.61126	2.63823	2.54589	2.56379	1.49864	1.35719	1.36091	1.37581	1.37074
FRA	7.1	Road transport, light duty vehicles	13.6676	12.5941	11.2199	9.84332	8.80901	8.16437	7.19009	1629.37	1486.99	1212.72	993.708	849.48	720.751	603.224	184.666	164.457	134.778	111.18	95.4064	79.2668	67.4715	11.398	11.0387	10.415	9.86268	9.29592	10.1343	9.23893	436.271	417.275	390.874	372.856	359.595	341.33	337.344	34.8488	33.1619	27.8504	26.0365	24.9059	23.6869	23.0404	31.9946	30.4443	25.5621	23.8992	22.8624
FRA	7.2	Road transport, heavy duty vehicles	2.05948	1.81448	1.51856	1.31985	1.16723	1.06511	0.918231	83.8774	85.8705	83.5895	84.2217	79.9408	66.1934	54.3592	19.3315	18.8567	17.7244	17.1596	15.757	12.6395	9.93135	0.105202	0.109197	0.109741	0.112169	0.114925	0.110339	0.101333	373.846	372.749	359.836	352.586	340.901	299.464	258.276	9.78633	9.30441	8.5819	8.1022	7.37776	5.95944	4.71212	9.00336	8.55998	7.89528	7.45396	6.78747
FRA	7.3	Road transport, mopeds and motorcycles	1.75972	1.61536	1.4315	1.26807	1.14854	1.08093	0.971408	118.94	117.793	114.577	105.911	102.687	96.2467	87.244	39.6662	37.5828	35.5977	30.9559	27.1813	24.5784	22.1715	0.01328	0.014295	0.0155645	0.016589	0.0183778	0.0198374	0.0214657	1.59083	1.78768	1.97295	2.11265	2.33728	2.45202	2.5249	0.63412	0.60768	0.578573	0.505406	0.448341	0.406079	0.366705	0.499836	0.478995	0.456052	0.398379	0.353398
FRA	7.4	Road transport, gasoline evaporation	0	0	0	0	0	0	0	0	0	0	0	0	0	0	97.3998	78.5149	63.6883	52.7787	41.6426	32.2772	26.9082	0	0	0	0	0	0	0	0	0	0	0	0	0	0	0	0	0	0	0	0	0	0	0	0	0	0
FRA	7.5	Road transport, wear	0	0	0	0	0	0	0	0	0	0	0	0	0	0	0	0	0	0	0	0	0	0	0	0	0	0	0	0	0	0	0	0	0	0	0	15.6189	15.8136	15.7429	15.9516	16.1686	15.775	15.5953	4.05713	4.09942	4.07711	4.12797	4.18057
FRA	8.1	Air transport (<1000m)	0.08537	0.08356	0.08222	0.08197	0.0824	0.08192	0.07713	9.13246	9.2297	9.20985	9.41189	9.63066	9.60725	9.00227	1.80167	1.79095	1.78482	1.81926	1.88935	1.87255	1.77322	0	0	0	0	0	0	0	15.2753	15.745	16.0429	16.0904	16.4002	16.5935	15.8928	1.02397	1.02687	1.02832	1.02605	1.03204	1.03725	0.985281	0.774878	0.777072	0.777051	0.772295	0.774721
FRA	8.2	Rail transport	0.04075	0.04014	0.03632	0.03525	0.03327	0.03403	0.03098	2.41634	2.38014	2.15389	2.09054	1.97289	2.01814	1.83714	1.05182	1.03606	0.937575	0.909999	0.858787	0.878484	0.799696	0	0	0	0	0	0	0	8.93571	8.80184	7.96516	7.73089	7.29582	7.46316	6.79382	3.60928	3.57546	3.30807	3.24717	3.14231	3.16487	2.91209	1.89746	1.87061	1.70892	1.66777	1.59667
FRA	8.3	Navigation, non-international	0	0	0	0	0	0	0	51.0125	52.546	50.1596	49.0508	46.8274	44.0926	42.4497	7.06786	7.45677	7.28	7.44573	7.05966	6.56754	6.20961	0	0	0	0	0	0	0	67.1003	65.5035	66.552	65.1847	65.8203	62.9367	63.0195	6.03252	5.96004	6.05	5.97992	6.09353	5.87787	5.8863	4.23029	4.1765	4.242	4.19319	4.27423
FRA	8.4	Mobile machinery, agriculture	0	0	0	0	0	0	0	86.8298	86.302	87.1327	86.5864	86.1181	89.0357	85.3091	34.0522	33.2483	32.9678	32.0485	31.1657	30.3375	27.2901	0	0	0	0	0	0	0	134.372	128.55	125.989	119.132	111.963	110.346	100.56	29.0851	28.1788	27.9862	26.8781	25.6872	26.137	24.6632	21.1725	20.3593	20.0586	19.107	18.103
FRA	8.5	Mobile machinery, industry	0	0	0	0	0	0	0	28.0593	27.2358	25.4448	26.4234	20.3613	18.6316	15.852	13.2937	12.7576	11.6034	11.9164	8.98291	6.74595	5.3636	0	0	0	0	0	0	0	67.5859	62.2404	55.7037	54.6664	38.8729	35.7506	28.1776	7.34153	6.63851	5.84937	5.61299	3.93492	3.73044	2.92248	6.74043	6.08207	5.34756	5.11749	3.57558
FRA	8.6	Other mobile sources	0	0	0	0	0	0	0	103.205	103.205	103.205	103.205	103.205	103.205	103.205	5.20748	5.20748	4.94368	4.67987	4.41599	4.15211	3.83979	0	0	0	0	0	0	0	1.28434	1.28434	1.29119	1.29803	1.30484	1.31165	1.31837	0.160175	0.160175	0.160175	0.160175	0.160175	0.160175	0.160175	0.158335	0.158335	0.158335	0.158335	0.158335
FRA	9.1	Landfills	759.375	773.692	780.94	791.552	804.533	811.069	812.839	0	0	0	0	0	0	0	3.92565	3.82705	3.69944	3.57606	3.47105	3.34097	3.22607	0	0	0	0	0	0	0	0	0	0	0	0	0	0	0	0	0	0	0	0	0	0	0	0	0	0
FRA	9.2	Controlled waste incineration	8.19099	9.95912	9.41587	8.85879	8.56294	9.70934	9.78502	1.22601	0.885419	0.777795	0.567773	0.551689	0.53204	0.550502	0.0695483	0.0606191	0.0572036	0.0554277	0.0517397	0.0536376	0.0601823	0.00150803	0.00165655	0.00186699	0.00218461	0.0026584	0.00304875	0.00363257	3.46965	3.24053	3.61979	3.06762	2.75073	2.76298	2.6547	0.179006	0.149172	0.106548	0.111192	0.0819649	0.0975184	0.0911379	0.0998186	0.0752352	0.0550627	0.0512076	0.0379649
FRA	9.3	Other waste treatment	61.7121	61.754	61.6902	61.5876	62.1486	62.6756	63.5842	236.423	287.724	271.855	255.584	246.889	280.02	282.088	10.7495	12.6577	12.1175	11.7753	12.0791	13.4159	13.4991	11.1241	13.2479	13.1785	12.5356	12.3285	13.4915	13.9919	1.84797	2.20425	2.11068	2.00817	1.9595	2.20632	2.23053	13.6666	16.5795	15.698	14.7865	14.3066	16.2074	16.3364	11.7224	14.2192	13.4643	12.6833	12.2724
FRA	10.1	Livestock, Cattle	1674.59	1654.42	1659.25	1662.77	1682.54	1701.06	1673.51	0	0	0	0	0	0	0	0	0	0	0	0	0	0	350.689	344.896	343.545	343.567	347.774	349.515	345.47	0	0	0	0	0	0	0	1.84254	1.81597	1.81517	1.82528	1.85559	1.86942	1.85109	0.548841	0.540927	0.540689	0.5437	0.552728
FRA	10.2	Livestock, Poultry	32.7669	31.3104	30.4556	29.4072	29.9324	29.6309	29.9568	0	0	0	0	0	0	0	0	0	0	0	0	0	0	135.938	128.43	124.564	121.642	122.414	119.028	118.914	0	0	0	0	0	0	0	10.1824	9.7226	9.47237	9.10818	9.28426	9.18921	9.29196	2.2016	2.10218	2.04808	1.96934	2.00741
FRA	10.3	Livestock, Sheep	93.7163	92.7319	91.9708	89.6212	85.3433	82.9447	81.6426	0	0	0	0	0	0	0	0	0	0	0	0	0	0	8.26175	8.18095	8.12174	7.91392	7.52712	7.31461	7.14818	0	0	0	0	0	0	0	0.566541	0.560283	0.554889	0.543216	0.516022	0.498453	0.490699	0.167176	0.165329	0.163738	0.160293	0.152269
FRA	10.4	Livestock, Goats	15.8656	15.6937	15.8224	15.8077	15.3861	15.3925	15.9692	0	0	0	0	0	0	0	0	0	0	0	0	0	0	1.12817	1.1193	1.12453	1.1304	1.1199	1.11626	1.1675	0	0	0	0	0	0	0	0.0747115	0.0739668	0.0747103	0.075191	0.0748077	0.0749044	0.0779036	0.022046	0.0218263	0.0220457	0.0221875	0.0220744
FRA	10.5	Livestock, Pigs	257.247	254.703	254.214	253.854	252.853	254.292	249.705	0	0	0	0	0	0	0	0	0	0	0	0	0	0	93.218	92.1893	91.741	91.3164	90.6864	90.9123	89.2551	0	0	0	0	0	0	0	4.08022	4.04405	4.03157	4.01564	4.00097	4.02155	3.94673	0.901578	0.893586	0.890829	0.887309	0.884067
FRA	10.6	Livestock, Other animals	10.4887	10.6698	10.6467	10.5744	10.5381	10.4803	10.519	0	0	0	0	0	0	0	0	0	0	0	0	0	0	3.29132	3.34982	3.34536	3.31989	3.30366	3.28345	3.29543	0	0	0	0	0	0	0	0.0275292	0.0280185	0.0279812	0.0277682	0.0276325	0.0274634	0.0275636	0.00812338	0.00826776	0.00825674	0.00819389	0.00815384
FRA	10.7	Crops and pastures	0	0	0	0	0	0	0	0	0	0	0	0	0	0	0	0	0	0	0	0	0	141.602	147.33	148.375	148.602	144.533	159.114	150.972	0	0	0	0	0	0	0	0	0	0	0	0	0	0	0	0	0	0	0
FRA	10.8	Agricultural waste burning	0	0	0	0	0	0	0	0	0	0	0	0	0	0	0	0	0	0	0	0	0	0	0	0	0	0	0	0	0	0	0	0	0	0	0	0	0	0	0	0	0	0	0	0	0	0	0
FRA	10.9	Rice cultivation	4.4326	4.942	4.5656	4.4576	4.4502	4.2846	5.2482	0	0	0	0	0	0	0	0	0	0	0	0	0	0	0	0	0	0	0	0	0	0	0	0	0	0	0	0	0	0	0	0	0	0	0	0	0	0	0	0
FRA	10.10	Storage and handling of agricultural products	0	0	0	0	0	0	0	0	0	0	0	0	0	0	0	0	0	0	0	0	0	0	0	0	0	0	0	0	0	0	0	0	0	0	0	0	0	0	0	0	0	0	0	0	0	0	0
FRA	10.11	Other agriculture	0	0	0	0	0	0	0	0	0	0	0	0	0	0	0	0	0	0	0	0	0	0	0	0	0	0	0	0	0	0	0	0	0	0	0	98.1769	101.319	99.6077	99.2238	100.236	102.793	102.567	22.5923	23.9228	23.2132	23.1618	23.8751
GBR	1.1	Power plants	3.38954	3.39521	3.68772	3.78475	3.86645	4.08706	4.0405	70.5557	71.6421	73.2542	79.7647	80.2008	81.0599	70.8977	4.4984	4.43888	4.0036	4.55124	2.95586	3.25725	2.9725	0.762246	0.720366	0.702231	0.741149	0.725624	0.822668	0.800081	382.339	359.719	374.674	391.468	360.244	277.729	251.193	8.36647	9.02763	10.0948	11.4551	9.50856	8.64744	6.43171	4.5583	4.77259	5.50335	6.09056	5.21138
GBR	1.2	Refineries	0.53113	0.49932	0.53889	0.44326	0.43415	0.42128	0.38924	4.97388	5.27773	9.23231	5.51196	4.64622	3.73705	5.52847	34.6005	33.9755	33.278	32.3273	31.5284	30.4136	25.3115	0.07185	0.0659807	0.0677113	0.055757	0.055125	0.040255	0.0418	26.5983	29.8188	30.745	28.3839	26.3721	25.3607	23.8334	1.92538	1.93158	1.80894	1.73271	1.52862	1.14328	1.55244	0.862361	0.886772	0.775408	0.79533	0.725876
GBR	2.1	Residential combustion (including commercial/institutional)	24.5033	23.4715	21.4273	21.8197	23.1998	24.8905	23.5579	385.598	355.905	285.806	273.217	283.799	303.701	301.153	31.6187	31.6121	31.5469	33.7248	36.7217	39.8716	39.9501	1.76985	1.67104	1.43036	1.46654	1.64526	1.75781	1.80587	77.3607	75.0327	71.3202	67.3812	64.6597	64.9588	58.7812	15.0177	14.4643	13.743	14.7433	16.3462	17.9089	17.7434	7.88798	7.96789	7.99129	8.61428	9.45241
GBR	2.2	Agricultural stationary combustion	1.16822	1.15774	1.24194	1.33885	1.27819	1.897	1.90854	15.1117	15.1317	16.5538	18.3838	17.5022	27.8316	28.0779	1.82463	1.82541	1.99452	2.21663	2.11164	3.34815	3.3837	5.76937e-05	5.82874e-05	6.38101e-05	6.96318e-05	6.61012e-05	0.000106036	0.00010449	0.688581	0.712665	0.729752	0.751405	0.724446	1.09166	0.920933	2.23547	2.24367	2.45349	2.71884	2.58729	4.12799	4.13387	1.27874	1.2841	1.40404	1.55224	1.47687
GBR	34.1	Iron and steel industry (including coke ovens)	17.7352	18.1656	17.5033	15.7915	16.1012	15.0969	13.5257	322.74	340.493	349.059	375.799	353.709	323.432	267.931	3.18911	3.76049	3.84381	3.12734	3.17432	2.96594	2.45149	0.0983904	0.0963811	0.0944876	0.0926241	0.0923642	0.0947616	0.0945123	83.409	84.8141	82.4503	73.2085	72.4189	67.3976	60.066	5.59246	5.52658	4.91662	5.06089	7.40763	6.93444	5.90775	3.14775	3.10296	2.74413	2.70903	3.77236
GBR	34.2	Non-ferrous metal industry	0	0	0	0	0	0	0	29.5848	29.3989	29.9643	38.0338	36.7783	34.9835	29.6562	0	0	0	0	0	0	0	0.00585275	0.00585275	0.00585275	0.00585275	0.00585275	0.00585275	0.00585275	0.361443	0.368721	0.371674	0.362621	0.358847	0.341892	0.269714	0.979601	0.909155	0.883468	0.772292	0.633595	0.633411	0.353021	0.920641	0.834931	0.811823	0.70955	0.573795
GBR	34.3	Chemical industry	4.5746	4.09043	3.52624	3.20862	3.62909	3.13178	3.63194	37.6267	29.0301	25.2322	26.2591	29.1626	24.1393	13.2087	63.9528	43.0346	38.2179	31.9271	30.4612	24.2399	18.7203	2.06162	1.91589	4.022	3.9802	3.78965	3.16352	2.78794	1.13084	1.255	0.996896	0.949281	1.06671	0.727651	0.671623	0.893418	0.627335	0.651332	0.679521	0.547742	0.384762	0.170402	0.742213	0.52143	0.541153	0.564196	0.454767
GBR	34.4	Paper and pulp industry	0	0	0	0	0	0	0	0	0	0	0	0	0	0	0	0	0	0	0	0	0	0.005	0.005	0.005	0.005	0.005	0.005	0.005	0	0	0	0	0	0	0	0	0	0	0	0	0	0	0	0	0	0	0
GBR	34.5	Cement industry	0	0	0	0	0	0	0	0	0	0	0	0	0	0	0	0	0	0	0	0	0	0	0	0	0	0	0	0	0	0	0	0	0	0	0	0.04335	0.04335	0.0481667	0.0529833	0.0578	0.0578	0.0578	0.023409	0.023409	0.02601	0.028611	0.031212
GBR	34.6	Other non-metallic minerals industry	0	0	0	0	0	0	0	6.98	6.832	3.581	4.374	5.01389	5.33857	4.25518	0.202081	0.163497	0.175854	0.186605	0.17906	0.170448	0.17906	0	0	0	0	0	0	0	0	0	0	0	0	0	0	10.0585	9.88509	9.70025	9.38802	9.37389	8.49436	7.44257	3.0089	2.93893	2.89256	2.80092	2.79151
GBR	34.7	Storage and handling in industry	0	0	0	0	0	0	0	2.66995	2.61039	4.27918	4.66799	3.44403	4.42687	1.65585	1.33382	1.36285	1.92918	3.0616	3.6323	2.79684	1.31966	0.306066	0.43385	0.50724	0.420612	0.449999	0.40772	0.454882	0	0	0	0	0	0	0	3.68996	3.89331	4.27647	4.02336	4.19062	3.50258	2.61963	2.75819	2.92918	3.18609	3.02027	3.14593
GBR	34.8	Other industries	5.75573	5.62681	5.38951	5.20855	5.21642	5.22568	4.49927	127.088	127.058	99.6638	97.0876	97.4186	105.684	94.0974	83.966	83.3525	81.3639	80.5056	81.8716	83.6575	84.0545	1.2263	1.16081	1.18608	1.21019	1.13081	1.22363	1.10842	147.343	149.346	148.316	138.157	137.443	127.951	108.035	9.20823	9.36036	8.18415	7.86629	7.26301	7.00517	6.7921	6.0548	6.17454	5.43946	5.2851	4.82693
GBR	5.1	Coal production	260.487	235.505	195.234	181.255	127.078	133.751	136.811	0	0	0	0	0	0	0	0	0	0	0	0	0	0	0	0	0	0	0	0	0	0	0	0	0	0	0	0	0	0	0	0	0	0	0	0	0	0	0	0
GBR	5.2	Oil production	509.948	495.717	444.681	416.102	375.213	363.074	366.549	0.500267	0.460359	0.501514	0.212125	0.18856	0.68257	1.17644	119.91	89.3299	82.4776	78.5053	81.0484	61.0609	47.3757	0	0	0	0	0	0	0	0.680943	0.523535	0.653712	0.535781	0.11466	0.30468	0.24395	0	0	0	0	0	0	0	0	0	0	0	0
GBR	5.3	Gas production	116.948	117.93	110.302	102.911	92.5053	89.2012	89.7104	0	0	0	0	0	0	0	43.7802	45.6578	45.0697	41.6457	41.5036	37.3325	37.1185	0	0	0	0	0	0	0	0	0	0	0	0	0	0	0	0	0	0	0	0	0	0	0	0	0	0
GBR	5.4	Gasoline distribution	0	0	0	0	0	0	0	0	0	0	0	0	0	0	59.1564	54.9629	49.9096	47.6757	43.6052	38.5396	34.6566	0	0	0	0	0	0	0	0	0	0	0	0	0	0	0	0	0	0	0	0	0	0	0	0	0	0
GBR	5.5	Flaring	0	0	0	0	0	0	0	10.2032	10.444	11.8939	10.4085	11.0736	8.90346	9.92657	22.9242	30.8533	22.7062	22.2506	24.9509	23.6919	25.8355	0	0	0	0	0	0	0	1.97191	2.03563	2.24571	1.97531	2.23968	1.79204	1.96774	1.02551	1.14607	1.10445	1.07286	1.1587	0.991686	1.05159	1.02551	1.14607	1.10445	1.07286	1.1587
GBR	6.1	Solvent and other product use	0	0	0	0	0	0	0	0	0	0	0	0	0	0	414.245	414.146	408.368	407.417	400.528	380.24	360.493	1.20517	1.20517	1.20517	1.20517	1.20517	1.20517	1.20517	0	0	0	0	0	0	0	5.56431	5.50076	5.39699	5.82906	5.76911	4.96041	4.12886	1.94751	1.92527	1.88895	2.04017	2.01919
GBR	7.1	Road transport, light duty vehicles	9.08473	8.02492	7.08523	6.48168	5.875	5.16413	3.57697	2620.33	2329.06	2012.99	1786.77	1593.68	1443.5	982.775	202.126	176.242	152.45	135.164	121.107	110.002	65.899	18.3295	17.0849	15.707	14.6184	13.3921	12.1315	11.209	353.274	329.807	305.109	275.185	249.763	227.636	174.691	13.7641	13.2909	12.7827	11.9839	11.4133	10.6971	10.0597	13.0759	12.6264	12.1436	11.3847	10.8426
GBR	7.2	Road transport, heavy duty vehicles	0.688263	0.654188	0.636943	0.55841	0.479715	0.393244	0.247735	55.6749	55.5136	53.7627	52.1614	47.7247	40.3833	33.3522	12.3397	11.613	10.6901	9.91387	8.59498	6.74814	5.41287	0.10529	0.107065	0.10599	0.107004	0.108173	0.105102	0.0977647	272.619	268.673	257.887	251.518	239.642	214.473	185.28	6.48448	6.01249	5.43724	5.03131	4.43151	3.6086	2.96123	6.16026	5.71186	5.16538	4.77974	4.20994
GBR	7.3	Road transport, mopeds and motorcycles	0.58004	0.597536	0.636943	0.60226	0.567199	0.521491	0.381089	100.687	88.4091	86.4012	76.7763	74.3227	63.1486	59.5438	10.3362	8.72192	8.42159	7.21772	7.10849	5.68156	5.35574	0.0110468	0.010177	0.0107499	0.010299	0.0110784	0.0102221	0.0104105	1.76035	1.59466	1.59354	1.4652	1.42517	1.27577	1.22124	0.16111	0.13719	0.13089	0.111755	0.108598	0.0885732	0.0833673	0.153055	0.130331	0.124346	0.106167	0.103168
GBR	7.4	Road transport, gasoline evaporation	0	0	0	0	0	0	0	0	0	0	0	0	0	0	64.9372	47.8731	34.2833	25.1316	18.2269	13.7389	10.1466	0	0	0	0	0	0	0	0	0	0	0	0	0	0	0	0	0	0	0	0	0	0	0	0	0	0
GBR	7.5	Road transport, wear	0	0	0	0	0	0	0	0	0	0	0	0	0	0	0	0	0	0	0	0	0	0	0	0	0	0	0	0	0	0	0	0	0	0	0	14.0486	14.2811	14.28	14.4888	14.6647	14.4872	14.2068	7.65539	7.78399	7.78492	7.9015	7.99752
GBR	8.1	Air transport (<1000m)	0.10623	0.10595	0.10791	0.09956	0.07181	0.06613	0.05122	53.2196	60.6215	64.6769	58.8874	41.8138	38.2303	30.0098	2.56594	2.37747	2.41296	2.29267	1.97476	1.86056	1.61034	0	0	0	0	0	0	0	16.8888	18.4162	20.211	20.039	19.708	18.7415	17.386	0.190651	0.197282	0.213764	0.207579	0.197782	0.188922	0.171564	0.144895	0.149934	0.16246	0.15776	0.150314
GBR	8.2	Rail transport	0.15473	0.16109	0.17464	0.17677	0.17534	0.18543	0.18494	11.4272	11.8511	12.6346	12.715	12.6122	13.2814	13.8206	3.36217	3.5087	3.60852	3.67451	3.64071	3.70076	3.51747	0	0	0	0	0	0	0	33.7243	35.6094	36.9853	37.6109	37.1761	37.0384	35.6397	0.609824	0.639274	0.669544	0.682378	0.675448	0.688809	0.682155	0.573235	0.600918	0.629371	0.641436	0.634921
GBR	8.3	Navigation, non-international	0	0	0	0	0	0	0	3.98939	4.01512	4.15003	3.91897	3.85799	3.75671	3.55656	1.47285	1.48162	1.53267	1.43461	1.44119	1.4024	1.32561	0.0199826	0.0199826	0.0199826	0.0199826	0.0199826	0.0199826	0.0199826	76.4264	76.3167	78.306	73.1233	70.9375	68.5822	64.8876	2.92877	2.94561	3.05335	2.85108	1.77174	1.71651	1.62298	2.42854	2.4425	2.53181	2.36415	1.46951
GBR	8.4	Mobile machinery, agriculture	0	0	0	0	0	0	0	22.815	21.3247	21.7906	20.2252	19.4255	19.0998	19.5706	9.60202	8.76387	8.70892	7.62924	6.83292	6.25053	6.01049	0.0435681	0.0412366	0.0413789	0.0388362	0.0373087	0.0367316	0.0376166	64.983	58.3825	54.8412	47.1684	40.6603	35.7191	33.0476	7.05778	6.18896	5.71789	4.82287	4.09568	3.54059	3.24551	5.43449	4.7655	4.40278	3.71362	3.15368
GBR	8.5	Mobile machinery, industry	0	0	0	0	0	0	0	207.721	220.742	217.911	226.301	233.673	225.391	196.463	23.0095	24.0146	23.5372	23.6648	23.7555	22.5052	19.5141	0.0788705	0.0823188	0.0812898	0.0834844	0.0854851	0.0819036	0.0702525	108.095	109.015	104.634	102.499	101.009	94.3841	81.4465	10.2981	10.2382	9.6556	9.06877	8.676	7.89937	6.75761	7.93045	7.8844	7.4358	6.98399	6.6816
GBR	8.6	Other mobile sources	0.08874	0.08356	0.07485	0.07802	0.07925	0.07692	0.06668	75.9775	75.513	74.987	75.8936	76.8243	77.2619	77.0577	15.8617	15.2173	13.7137	12.4702	11.3726	9.84569	8.26797	0.00515934	0.00549194	0.00575902	0.00591113	0.00603793	0.00594034	0.0056639	29.7674	30.9764	28.3095	27.9428	30.5968	27.9925	25.5852	1.04925	1.07297	1.00216	0.984757	1.09268	0.995059	0.886877	0.962399	0.987385	0.923083	0.905427	1.00755
GBR	9.1	Landfills	954.352	877.814	845.637	825.906	803.967	779.338	755.7	0	0	0	0	0	0	0	9.54352	8.77814	8.45637	8.25906	8.03967	7.79338	7.557	4.10023	3.96524	3.7827	3.38081	3.14151	2.89915	2.48652	0	0	0	0	0	0	0	0	0	0	0	0	0	0	0	0	0	0	0
GBR	9.2	Controlled waste incineration	0.1583	0.14657	0.14132	0.13651	0.12804	0.11274	0.11274	3.38097	3.34537	3.30248	3.23574	3.16107	2.81281	2.81283	0.177047	0.177599	0.170346	0.27536	0.162513	0.143099	0.1431	0.0299634	0.0285643	0.0288647	0.0277137	0.0354927	0.0314592	0.0351585	0.954899	0.874715	0.644	0.662843	0.616008	0.509557	0.509684	0.0644904	0.0423144	0.0356677	0.0258359	0.0271914	0.0277931	0.0277946	0.0644904	0.0423144	0.0356677	0.0258359	0.0271914
GBR	9.3	Other waste treatment	16.3399	16.6822	16.7757	16.9406	16.5998	16.6549	16.0173	19.2079	19.2054	19.2054	19.2043	19.2045	19.2052	19.2038	6.14823	6.148	6.148	6.1479	6.14791	6.14797	6.14785	6.61164	6.61164	7.12066	7.44502	8.03676	8.88676	10.1481	0.77801	0.772549	0.772502	0.770095	0.770415	0.771937	0.769031	4.36998	4.36998	4.36998	4.36998	4.36998	4.36998	4.36998	4.36998	4.36998	4.36998	4.36998	4.36998
GBR	10.1	Livestock, Cattle	653.462	658.353	680.651	660.418	661.494	646.31	638.903	0	0	0	0	0	0	0	0	0	0	0	0	0	0	124.152	124.321	122.713	122.385	120.08	118.235	117.001	0	0	0	0	0	0	0	0.671183	0.668929	0.654054	0.650874	0.642488	0.63029	0.622299	0.120813	0.120407	0.11773	0.117157	0.115648
GBR	10.2	Livestock, Poultry	13.9666	13.8004	13.5825	13.4066	13.0616	12.9189	12.3835	0	0	0	0	0	0	0	0	0	0	0	0	0	0	36.5256	36.1212	34.1116	34.0209	30.9305	29.9468	28.6022	0	0	0	0	0	0	0	9.568	9.72111	9.26772	9.26372	8.97403	8.94361	8.49838	1.72224	1.7498	1.66819	1.66747	1.61533
GBR	10.3	Livestock, Sheep	176.265	176.811	169.127	169.204	163.375	158.897	152.513	0	0	0	0	0	0	0	0	0	0	0	0	0	0	3.30293	3.32423	3.21704	3.17072	3.0653	2.96592	2.84963	0	0	0	0	0	0	0	0	0	0	0	0	0	0	0	0	0	0	0
GBR	10.4	Livestock, Goats	0.45288	0.46856	0.49308	0.50242	0.48885	0.49232	0.51845	0	0	0	0	0	0	0	0	0	0	0	0	0	0	0	0	0	0	0	0	0	0	0	0	0	0	0	0	0	0	0	0	0	0	0	0	0	0	0	0
GBR	10.5	Livestock, Pigs	43.2009	44.1727	40.2018	42.2221	41.3822	40.3477	40.44	0	0	0	0	0	0	0	0	0	0	0	0	0	0	22.5307	22.5893	21.2166	21.2556	20.0384	18.608	17.6031	0	0	0	0	0	0	0	1.25171	1.28043	1.20832	1.22651	1.20345	1.17564	1.17506	0.225307	0.230477	0.217497	0.220772	0.216622
GBR	10.6	Livestock, Other animals	5.81779	6.38879	6.6913	7.52182	7.44471	7.18237	7.30829	0	0	0	0	0	0	0	0	0	0	0	0	0	0	21.9885	21.9885	22.2722	25.3272	22.1944	22.8447	22.8447	0	0	0	0	0	0	0	0	0	0	0	0	0	0	0	0	0	0	0
GBR	10.7	Crops and pastures	0	0	0	0	0	0	0	0	0	0	0	0	0	0	0	0	0	0	0	0	0	63.5804	70.193	69.0172	67.827	70.55	61.9794	65.994	0	0	0	0	0	0	0	0	0	0	0	0	0	0	0	0	0	0	0
GBR	10.8	Agricultural waste burning	0	0	0	0	0	0	0	0	0	0	0	0	0	0	0	0	0	0	0	0	0	0	0	0	0	0	0	0	0	0	0	0	0	0	0	0	0	0	0	0	0	0	0	0	0	0	0
GBR	10.9	Rice cultivation	0	0	0	0	0	0	0	0	0	0	0	0	0	0	0	0	0	0	0	0	0	0	0	0	0	0	0	0	0	0	0	0	0	0	0	0	0	0	0	0	0	0	0	0	0	0	0
GBR	10.10	Storage and handling of agricultural products	0	0	0	0	0	0	0	0	0	0	0	0	0	0	0	0	0	0	0	0	0	0	0	0	0	0	0	0	0	0	0	0	0	0	0	0	0	0	0	0	0	0	0	0	0	0	0
GBR	10.11	Other agriculture	0	0	0	0	0	0	0	0	0	0	0	0	0	0	0	0	0	0	0	0	0	0	0	0	0	0	0	0	0	0	0	0	0	0	0	2.26581	2.31967	2.21405	2.19433	2.0166	2.55981	2.32305	0.151809	0.155418	0.148341	0.14702	0.135112
GRC	1.1	Power plants	0.66676	0.6578	0.67795	0.66582	0.7139	0.71301	0.62128	8.88231	8.88568	9.34673	9.37955	9.78233	9.60437	9.99551	4.4004	4.4252	4.45	4.3546	4.2592	4.1638	4.0684	0	0	0	0	0	0	0	106.005	106.317	106.63	104.124	101.619	99.1132	96.6076	29.2883	28.4982	27.7106	25.3524	22.9952	20.6379	18.2807	15.9712	15.8942	15.8171	14.5869	13.356
GRC	1.2	Refineries	0.13618	0.14203	0.15459	0.17564	0.18166	0.17231	0.16285	4.68927	4.81636	4.87752	4.88113	5.00067	4.83993	5.0176	8.0332	7.961	7.89	7.8274	7.7664	7.707	7.646	0	0	0	0	0	0	0	6.6292	6.4346	6.24	6.2128	6.1856	6.1596	6.1328	0.552496	0.550788	0.55019	0.555319	0.560448	0.565576	0.570705	0.416556	0.415138	0.41372	0.41715	0.420579
GRC	2.1	Residential combustion (including commercial/institutional)	3.27871	3.7164	3.164	3.58342	3.4976	3.4041	3.34688	134.517	134.278	135.463	135.826	135.372	136.095	135.978	24.6043	24.5983	24.5947	24.5995	24.6075	24.6163	24.6235	0	0	0	0	0	0	0	9.74835	10.1014	10.4544	10.4784	10.5036	10.5282	10.5528	12.1894	12.0421	11.8936	11.8288	11.764	11.6992	11.6344	11.4878	11.3906	11.2925	11.2524	11.2122
GRC	2.2	Agricultural stationary combustion	0.24356	0.24884	0.29653	0.2913	0.29509	0.26083	0.29681	0	0	0	0	0	0	0	0	0	0	0	0	0	0	0	0	0	0	0	0	0	0	0	0	0	0	0	0	0	0	0	0	0	0	0	0	0	0	0	0
GRC	34.1	Iron and steel industry (including coke ovens)	0.02812	0.02753	0.02821	0.02934	0.03115	0.02999	0.02463	4.44083	4.56013	4.6016	4.60059	4.71929	4.55667	4.71314	0	0	0	0	0	0	0	0	0	0	0	0	0	0	0	0	0	0	0	0	0	0.321457	0.363654	0.40585	0.397131	0.388413	0.379694	0.370976	0.26953	0.30491	0.34029	0.33298	0.32567
GRC	34.2	Non-ferrous metal industry	0.03343	0.03213	0.02606	0.02731	0.02691	0.02372	0.01566	1.26875	1.18075	1.06426	1.00022	1.2048	1.03718	0.905533	0	0	0	0	0	0	0	0	0	0	0	0	0	0	0	0	0	0	0	0	0	0.268672	0.267816	0.26696	0.266981	0.268061	0.268458	0.26988	0.195998	0.195364	0.19374	0.194514	0.194501
GRC	34.3	Chemical industry	0.01203	0.01667	0.01721	0.01852	0.01812	0.01566	0.01376	0.179068	0.166646	0.150206	0.141168	0.170042	0.146384	0.127804	0.264	0.262	0.26	0.273	0.2892	0.3038	0.3184	0	0	0	0	0	0	0	1.2284	1.0542	0.88	0.8402	0.8004	0.7606	0.7208	0.595411	0.583701	0.57199	0.557483	0.542976	0.52847	0.513963	0.434484	0.425897	0.41731	0.406637	0.39765
GRC	34.4	Paper and pulp industry	0.00985	0.00741	0.00662	0.00763	0.00734	0.00653	0.00485	0.067688	0.0629927	0.0567784	0.0533617	0.0642761	0.0553335	0.0483101	0.0044	0.0022	0	0.0094	0.0188	0.0294	0.0392	0	0	0	0	0	0	0	0.2652	0.2276	0.19	0.1842	0.1784	0.1726	0.1668	0.0164792	0.0142746	0.01207	0.0112736	0.0118024	0.0116686	0.0115348	0.0116324	0.0100762	0.00852	0.0083478	0.0092356
GRC	34.5	Cement industry	0	0	0	0	0	0	0	0	0	0	0	0	0	0	0	0	0	0	0	0	0	0	0	0	0	0	0	0	13.6648	13.0724	12.48	12.481	12.482	12.483	12.484	4.06229	4.03752	4.01275	4.0129	4.01306	4.01321	4.01336	3.58438	3.56252	3.54066	3.5408	3.54093
GRC	34.6	Other non-metallic minerals industry	0	0	0	0	0	0	0	5.31862	4.94968	4.46139	4.19292	5.05053	4.34785	3.79599	0	0	0	0	0	0	0	0	0	0	0	0	0	0	0.466	0.463	0.46	0.4602	0.4604	0.4606	0.4608	0.0204856	0.0213578	0.02223	0.0222286	0.0222272	0.0222258	0.0222244	0.0165148	0.0173924	0.01827	0.0182682	0.0182664
GRC	34.7	Storage and handling in industry	0	0	0	0	0	0	0	0	0	0	0	0	0	0	0	0	0	0	0	0	0	0	0	0	0	0	0	0	0	0	0	0	0	0	0	0.945533	0.946902	0.94827	0.946404	0.944537	0.942671	0.940804	0.107317	0.107484	0.10765	0.10744	0.107231
GRC	34.8	Other industries	0.34889	0.35443	0.43517	0.39968	0.39485	0.43826	0.38588	15.3075	14.2457	12.8403	12.0677	14.5359	12.5136	10.9252	0.7268	0.7078	0.69	0.698	0.7076	0.7164	0.7252	0	0	0	0	0	0	0	7.796	7.423	7.05	6.6286	6.2084	5.7876	5.3668	4.71049	4.65581	4.60316	4.58762	4.57239	4.55777	4.54444	1.41698	1.36964	1.32433	1.28146	1.23978
GRC	5.1	Coal production	68.6405	70.3912	69.745	64.8426	66.7963	66.0486	65.2175	0	0	0	0	0	0	0	0	0	0	0	0	0	0	0	0	0	0	0	0	0	0	0	0	0	0	0	0	1.77941	1.79279	1.80618	1.78123	1.75628	1.73133	1.70638	0.242633	0.244456	0.24628	0.242879	0.239479
GRC	5.2	Oil production	75.5007	77.3768	76.6363	72.2478	74.4044	73.9619	73.3838	0	0	0	0	0	0	0	0.9764	0.9682	0.96	0.954	0.948	0.942	0.936	0	0	0	0	0	0	0	0	0	0	0	0	0	0	0	0	0	0	0	0	0	0	0	0	0	0
GRC	5.3	Gas production	0.687545	0.737815	0.787205	0.861571	1.01968	1.1557	1.29869	0	0	0	0	0	0	0	0	0	0	0	0	0	0	0	0	0	0	0	0	0	0	0	0	0	0	0	0	0	0	0	0	0	0	0	0	0	0	0	0
GRC	5.4	Gasoline distribution	0	0	0	0	0	0	0	0	0	0	0	0	0	0	13.1284	12.4142	11.7	10.9516	10.2032	9.4548	8.7064	0	0	0	0	0	0	0	0	0	0	0	0	0	0	0	0	0	0	0	0	0	0	0	0	0	0
GRC	5.5	Flaring	0	0	0	0	0	0	0	0.030856	0.032828	0.0348	0.036772	0.038744	0.040716	0.042688	0	0	0	0	0	0	0	0	0	0	0	0	0	0	0.002	0.001	0	0	0	0.0012	0.0016	0.0038216	0.0030408	0.00226	0.0022874	0.0023148	0.0023422	0.0023696	0.0038216	0.0030408	0.00226	0.0022874	0.0023148
GRC	6.1	Solvent and other product use	0	0	0	0	0	0	0	0	0	0	0	0	0	0	59.8492	58.5896	57.33	56.205	55.08	53.955	52.83	0	0	0	0	0	0	0	0	0	0	0	0	0	0	0	0	0	0	0	0	0	0	0	0	0	0
GRC	7.1	Road transport, light duty vehicles	3.45235	3.46713	3.34632	3.23208	3.03901	2.78731	2.5302	340.991	309.479	288.599	256.464	228.048	185.701	184.827	71.4124	70.1962	68.98	61.4474	53.9148	46.3822	38.8496	2.68081	2.64311	2.6054	2.5677	2.53	2.67	2.81	55.4692	54.9446	54.42	49.6884	44.9568	40.2252	35.4936	1.04195	0.994803	0.94766	0.899681	0.851702	0.803724	0.755745	1.04195	0.994803	0.94766	0.899681	0.851702
GRC	7.2	Road transport, heavy duty vehicles	0.371719	0.366513	0.347092	0.335022	0.314759	0.288405	0.261473	15.488	14.0567	13.1083	11.6488	10.3581	8.43464	8.39498	4.2052	4.097	3.99	3.593	3.196	2.8002	2.4036	0	0	0	0	0	0	0	52.0756	51.9022	51.73	48.1492	44.5696	40.9894	37.4092	1.88365	1.83129	1.77894	1.6097	1.44046	1.27123	1.10199	1.88358	1.83123	1.77887	1.60963	1.4404
GRC	7.3	Road transport, mopeds and motorcycles	0.998496	1.01309	0.987877	1.01939	1.03286	1.03174	1.03388	282.927	256.781	239.456	212.794	189.216	154.08	153.355	41.5108	39.9204	38.33	35.7106	33.0912	30.4718	27.8524	0	0	0	0	0	0	0	0.7308	0.8254	0.92	1.053	1.186	1.319	1.452	0.663378	0.646734	0.63009	0.586261	0.542432	0.498602	0.454773	0.663378	0.646734	0.63009	0.586261	0.542432
GRC	7.4	Road transport, gasoline evaporation	0	0	0	0	0	0	0	0	0	0	0	0	0	0	30.3388	29.8844	29.43	26.298	23.166	20.034	16.902	0	0	0	0	0	0	0	0	0	0	0	0	0	0	0	0	0	0	0	0	0	0	0	0	0	0
GRC	7.5	Road transport, wear	0	0	0	0	0	0	0	0	0	0	0	0	0	0	0	0	0	0	0	0	0	0	0	0	0	0	0	0	0	0	0	0	0	0	0	1.77291	1.83815	1.9034	1.92014	1.93689	1.95364	1.97038	0.563446	0.581318	0.59919	0.600697	0.602205
GRC	8.1	Air transport (<1000m)	0.02041	0.02076	0.02037	0.02157	0.02262	0.02176	0.02439	4.08613	4.54012	4.38164	4.70876	4.41285	3.99745	4.16336	0.776	0.758	0.74	0.753	0.766	0.779	0.792	0	0	0	0	0	0	0	0.4116	0.4008	0.39	0.398	0.406	0.414	0.422	0.0200648	0.0195974	0.01913	0.0194664	0.0198028	0.0201392	0.0204756	0.01846	0.01803	0.0176	0.0179094	0.0182188
GRC	8.2	Rail transport	0.072	0.072	0.072	0.0738	0.0668	0.0648	0.05401	0.396336	0.440372	0.425	0.456729	0.428027	0.387735	0.403828	0.3048	0.3024	0.3	0.3192	0.3384	0.3576	0.3768	0	0	0	0	0	0	0	1.6104	1.6002	1.59	1.6932	1.7964	1.8996	2.0028	0.163771	0.162625	0.16148	0.170747	0.180014	0.18928	0.198547	0.15515	0.154065	0.15298	0.161759	0.170538
GRC	8.3	Navigation, non-international	0	0	0	0	0	0	0	1.20804	1.34226	1.2954	1.39211	1.30463	1.18182	1.23087	0.348335	0.361167	0.374	0.376127	0.378255	0.380382	0.382509	0	0	0	0	0	0	0	46.1646	47.8773	49.59	49.5968	49.6036	49.6104	49.6173	1.71702	1.80651	1.896	1.89876	1.90152	1.90429	1.90705	1.62646	1.71123	1.796	1.79862	1.80123
GRC	8.4	Mobile machinery, agriculture	0	0	0	0	0	0	0	7.20865	8.00958	7.73	8.3071	7.78505	7.05222	7.34491	4.46	4.445	4.43	4.367	4.304	4.241	4.178	0	0	0	0	0	0	0	23.422	23.326	23.23	22.8024	22.3748	21.9472	21.5196	2.58197	2.55666	2.53135	2.47798	2.4246	2.37123	2.31785	2.44607	2.4221	2.39812	2.34755	2.29699
GRC	8.5	Mobile machinery, industry	0	0	0	0	0	0	0	0.695686	0.772982	0.746	0.801694	0.751313	0.68059	0.708837	1.2208	1.2104	1.2	1.137	1.074	1.011	0.948	0	0	0	0	0	0	0	6.3892	6.3196	6.25	5.8922	5.5344	5.1766	4.8188	0.647825	0.632043	0.61626	0.580324	0.544389	0.508453	0.472518	0.613732	0.598781	0.58383	0.549785	0.51574
GRC	8.6	Other mobile sources	0	0	0	0	0	0	0	36.4629	40.5142	39.1	42.0191	39.3784	35.6716	37.1522	26.0968	25.9334	25.77	25.0184	24.2668	23.5152	22.7636	0	0	0	0	0	0	0	0.0616	0.0608	0.06	0.0608	0.0616	0.0624	0.0632	0.807419	0.79426	0.7811	0.750742	0.720385	0.690027	0.65967	0.742824	0.730717	0.71861	0.690681	0.662753
GRC	9.1	Landfills	119.322	119.058	118.147	123.018	119.106	117.637	117.333	0	0	0	0	0	0	0	0	0	0	0	0	0	0	0	0	0	0	0	0	0	0	0	0	0	0	0	0	0	0	0	0	0	0	0	0	0	0	0	0
GRC	9.2	Controlled waste incineration	6e-05	7e-05	0.00013	0.00016	0.00022	0.00026	0.00025	0	0	0	0	0	0	0	0	0	0	0	0	0	0	0	0	0	0	0	0	0	0	0	0	0	0	0	0	0	0	0	0	0	0	0	0	0	0	0	0
GRC	9.3	Other waste treatment	62.7626	61.9128	54.1111	54.4472	47.8921	41.0723	39.9583	5.852	6.226	6.6	6.974	7.348	7.722	8.096	11.6204	11.1852	10.75	10.4254	10.1008	9.7762	9.4516	0	0	0	0	0	0	0	0.1424	0.1412	0.14	0.1412	0.1424	0.1436	0.1448	2.24794	2.25246	2.25699	2.26266	2.26833	2.274	2.27967	2.14106	2.14558	2.15011	2.15578	2.16145
GRC	10.1	Livestock, Cattle	45.6189	47.0211	48.413	48.3065	47.6287	47.5186	47.3168	0	0	0	0	0	0	0	0	0	0	0	0	0	0	12.8401	12.6595	12.4789	12.2984	12.1178	12.07	11.4136	0	0	0	0	0	0	0	0.144771	0.149566	0.15436	0.155133	0.155907	0.15668	0.157454	0.032164	0.033227	0.03429	0.0344644	0.0346388
GRC	10.2	Livestock, Poultry	4.07909	4.14622	4.25816	4.30475	4.30202	4.3047	4.30464	0	0	0	0	0	0	0	0	0	0	0	0	0	0	9.52202	9.3881	9.25419	9.12027	8.98636	8.9	8.84566	0	0	0	0	0	0	0	1.45777	1.47525	1.49272	1.48675	1.48079	1.47482	1.46885	0.323946	0.327828	0.33171	0.330385	0.32906
GRC	10.3	Livestock, Sheep	83.5963	82.7417	82.1825	82.1899	82.2152	82.0796	81.8961	0	0	0	0	0	0	0	0	0	0	0	0	0	0	12.5247	12.3486	12.1725	11.9963	11.8202	11.74	11.778	0	0	0	0	0	0	0	0	0	0	0	0	0	0	0	0	0	0	0
GRC	10.4	Livestock, Goats	29.0066	28.5802	28.2017	28.0161	27.8293	27.5845	27.2837	0	0	0	0	0	0	0	0	0	0	0	0	0	0	7.5916	7.48483	7.37806	7.2713	7.16453	7.13	7.05795	0	0	0	0	0	0	0	0	0	0	0	0	0	0	0	0	0	0	0
GRC	10.5	Livestock, Pigs	7.98288	8.00717	7.90875	7.80107	7.69747	7.70865	7.70174	0	0	0	0	0	0	0	0	0	0	0	0	0	0	6.10629	6.02041	5.93454	5.84866	5.76278	5.48	5.7899	0	0	0	0	0	0	0	0.413783	0.415192	0.4166	0.412554	0.408508	0.404461	0.400415	0.07356	0.07381	0.07406	0.0733412	0.0726224
GRC	10.6	Livestock, Other animals	1.42951	1.36777	1.30959	1.277	1.22826	1.18349	1.12236	0	0	0	0	0	0	0	0	0	0	0	0	0	0	0.733848	0.723527	0.713207	0.702886	0.692565	0.66	0.636363	0	0	0	0	0	0	0	0	0	0	0	0	0	0	0	0	0	0	0
GRC	10.7	Crops and pastures	0	0	0	0	0	0	0	0	0	0	0	0	0	0	0	0	0	0	0	0	0	17.1127	16.872	16.6313	16.3907	16.15	14.45	14.45	0	0	0	0	0	0	0	0	0	0	0	0	0	0	0	0	0	0	0
GRC	10.8	Agricultural waste burning	6.583	6.583	6.583	6.583	6.583	6.583	6.583	55.3033	60.7055	60.6	55.1895	52.8643	52.8643	53.7401	8.5628	8.5614	8.56	8.5614	8.5628	8.5642	8.5656	1.317	1.317	1.317	1.317	1.317	1.317	1.317	1.3828	1.3814	1.38	1.3814	1.3828	1.3842	1.3856	7.19017	7.19017	7.19017	7.19017	7.19017	7.19017	7.19017	6.38001	6.38001	6.38001	6.38001	6.38001
GRC	10.9	Rice cultivation	4.51672	4.5478	4.62	4.46	5	5.00084	5.6	0	0	0	0	0	0	0	0	0	0	0	0	0	0	0	0	0	0	0	0	0	0	0	0	0	0	0	0	0	0	0	0	0	0	0	0	0	0	0	0
GRC	10.10	Storage and handling of agricultural products	0	0	0	0	0	0	0	0	0	0	0	0	0	0	0	0	0	0	0	0	0	0	0	0	0	0	0	0	0	0	0	0	0	0	0	0.206837	0.210253	0.21367	0.216053	0.218436	0.220818	0.223201	0.0364968	0.0370984	0.0377	0.0381218	0.0385436
GRC	10.11	Other agriculture	0	0	0	0	0	0	0	0	0	0	0	0	0	0	0	0	0	0	0	0	0	0	0	0	0	0	0	0	0	0	0	0	0	0	0	2.36576	2.36576	2.36576	2.36576	2.36576	2.36576	2.36576	0.525722	0.525721	0.52572	0.525721	0.525722
IRL	1.1	Power plants	0.39731	0.34632	0.35697	0.33803	0.33804	0.33693	0.30848	4.00768	3.50095	3.98346	3.83255	3.71297	4.04036	3.82899	0.229217	0.210104	0.24043	0.213775	0.195286	0.202024	0.179103	0	0	0	0	0	0	0	33.8197	32.3421	32.3959	29.8855	27.295	21.985	13.2616	5.11406	5.03586	5.47563	4.88952	4.28535	4.24683	3.61103	1.60591	1.53065	1.72977	1.54244	1.33027
IRL	1.2	Refineries	0.00753	0.00765	0.00908	0.00855	0.00833	0.00828	0.00679	0.00314693	0.0469744	0.0903211	0.0841879	0.0859998	0.076703	0.091813	1.28916	1.17464	1.32917	1.25958	1.35906	1.28148	1.12177	0	0	0	0	0	0	0	0.587899	0.821875	0.936094	0.81422	0.885111	0.773858	0.745936	0.192498	0.18023	0.188923	0.180558	0.173358	0.178308	0.15825	0.192498	0.18023	0.188923	0.180558	0.173358
IRL	2.1	Residential combustion (including commercial/institutional)	7.46006	7.32617	7.65239	7.45231	7.26676	7.75838	8.07626	39.752	38.3365	39.8948	39.4458	38.6981	40.4854	40.8585	4.87754	4.72596	4.91818	4.7619	4.59838	4.87734	4.84954	0.00883126	0.0086364	0.00905641	0.00897913	0.00960451	0.0100465	0.0111058	7.25124	7.28674	7.61283	7.4807	7.37843	7.93748	7.69591	2.69601	2.59388	2.70246	2.66931	2.64549	2.75257	2.77022	1.60207	1.55206	1.61849	1.60235	1.61568
IRL	2.2	Agricultural stationary combustion	0.05414	0.05188	0.05567	0.05332	0.05212	0.05189	0.04662	0.0182934	0.0175312	0.0188123	0.0180182	0.016911	0.0168336	0.0141688	0.0114334	0.010957	0.0117577	0.0112614	0.0105694	0.010521	0.0088555	0	0	0	0	0	0	0	0.0571669	0.0547849	0.0587884	0.056307	0.0528469	0.0526049	0.0442775	0.00571669	0.00547849	0.00587884	0.0056307	0.00528469	0.00526049	0.00442775	0.00571669	0.00547849	0.00587884	0.0056307	0.00528469
IRL	34.1	Iron and steel industry (including coke ovens)	0.00289	0.00261	0.00184	0.00158	0.0019	0.00251	0.0032	2.49435	2.24904	1.57883	1.35199	1.62602	2.1579	2.76405	0.142636	0.128618	0.0903205	0.0773582	0.0930174	0.12341	0.158048	0	0	0	0	0	0	0	0.146697	0.13268	0.0943817	0.0814194	0.0970786	0.127471	0.162109	0.0570125	0.0514055	0.0360863	0.0309014	0.0371651	0.0493222	0.0631771	0.0285104	0.025707	0.0180474	0.0154549	0.0185867
IRL	34.2	Non-ferrous metal industry	0.05232	0.05627	0.04463	0.04305	0.04264	0.04191	0.0309	0.213114	0.229451	0.181536	0.24064	0.256049	0.257161	0.206813	0.0129772	0.0139714	0.0022561	0.0347184	0.0431423	0.0451412	0.0419293	0	0	0	0	0	0	0	2.67586	2.77373	2.8217	2.44649	2.51369	2.28479	1.72387	0.560177	0.603201	0.579738	0.418372	0.376773	0.358403	0.226089	0.492473	0.530273	0.507439	0.366466	0.330114
IRL	34.3	Chemical industry	0.01143	0.0124	0.01236	0.00981	0.01305	0.01146	0.01211	0.0730434	0.0861179	0.0808363	0.0676397	0.0773552	0.0620458	0.0568612	0.017624	0.0220017	0.0223201	0.0189229	0.0219291	0.0177953	0.0161128	0	0	0	0	0	0	0	0.756697	0.882265	0.844376	0.705697	0.755705	0.612396	0.575219	0.0541636	0.048496	0.0368	0.0272287	0.054015	0.0484792	0.0475011	0.0481197	0.043179	0.0332153	0.0245525	0.0447875
IRL	34.4	Paper and pulp industry	0.00209	0.00225	0.00153	0.00106	0.00059	0.0004	0.00036	0.0144187	0.015987	0.0090283	0.00617455	0.0041533	0.0022458	0.00201094	0.00388691	0.00439375	0.0022812	0.00151977	0.00113497	0.000569951	0.000502952	0	0	0	0	0	0	0	0.137023	0.149537	0.0861794	0.0592316	0.0403361	0.0211806	0.0190167	0.00117728	0.00159187	0.00169987	0.000396152	0.000195863	0.000175462	0.000155931	0.00107581	0.00144234	0.00154834	0.000396152	0.000190529
IRL	34.5	Cement industry	0	0	0	0	0	0	0	0	0	0	0	0	0	0	0	0	0	0	0	0	0	0	0	0	0	0	0	0	0	0	0	0	0	0	0	0	0	0	0	0	0	0	0	0	0	0	0
IRL	34.6	Other non-metallic minerals industry	0	0	0	0	0	0	0	0	0	0	0	0	0	0	0	0	0	0	0	0	0	0	0	0	0	0	0	0	0	0	0	0	0	0	0	0	0	0	0	0	0	0	0	0	0	0	0
IRL	34.7	Storage and handling in industry	0	0	0	0	0	0	0	0	0	0	0	0	0	0	0	0	0	0	0	0	0	0	0	0	0	0	0	0	0	0	0	0	0	0	0	0.0521083	0.0492148	0.0473375	0.0446663	0.0425659	0.0397463	0.0375176	0.00651354	0.00615184	0.00591719	0.00558328	0.00532073
IRL	34.8	Other industries	0.2904	0.32349	0.39026	0.3762	0.36519	0.33445	0.29209	9.79863	11.5908	14.6924	14.8202	13.9259	12.6767	12.1011	0.516431	0.567222	0.671743	0.634679	0.61558	0.56367	0.486211	0	0	0	0	0	0	0	12.4044	13.5854	14.4596	14.2983	15.9264	14.7413	9.29644	1.98468	2.2375	2.73978	2.68757	2.56029	2.31948	2.13645	1.7064	1.93172	2.38918	2.37154	2.25194
IRL	5.1	Coal production	0	0	0	0	0	0	0	0	0	0	0	0	0	0	0	0	0	0	0	0	0	0	0	0	0	0	0	0	0	0	0	0	0	0	0	0	0	0	0	0	0	0	0	0	0	0	0
IRL	5.2	Oil production	0	0	0	0	0	0	0	0	0	0	0	0	0	0	0	0	0	0	0	0	0	0	0	0	0	0	0	0	0	0	0	0	0	0	0	0	0	0	0	0	0	0	0	0	0	0	0
IRL	5.3	Gas production	29.8465	3.16452	2.72299	2.25956	2.86467	2.46839	1.69846	0.0188685	0.0209045	0.026647	0.0266268	0.0228821	0.0256035	0.026404	0	0	0	0	0	0	0	0	0	0	0	0	0	0	0.283027	0.313567	0.399705	0.399402	0.343231	0.384052	0.39606	0.00037737	0.00041809	0.00053294	0.000532536	0.000457642	0.00051207	0.000528079	0.00037737	0.00041809	0.00053294	0.000532536	0.000457642
IRL	5.4	Gasoline distribution	0	0	0	0	0	0	0	0	0	0	0	0	0	0	5.54419	5.6912	5.98267	6.19272	6.30886	6.26859	5.72069	0	0	0	0	0	0	0	0	0	0	0	0	0	0	0	0	0	0	0	0	0	0	0	0	0	0
IRL	5.5	Flaring	0	0	0	0	0	0	0	0	0	0	0	0	0	0	0	0	0	0	0	0	0	0	0	0	0	0	0	0	0	0	0	0	0	0	0	0	0	0	0	0	0	0	0	0	0	0	0
IRL	6.1	Solvent and other product use	0	0	0	0	0	0	0	0	0	0	0	0	0	0	23.8685	23.7167	23.7605	24.1091	24.2822	23.8588	23.0363	0	0	0	0	0	0	0	0	0	0	0	0	0	0	0	0	0	0	0	0	0	0	0	0	0	0
IRL	7.1	Road transport, light duty vehicles	1.21265	1.1429	1.08309	1.03152	0.980196	0.935314	0.846104	132.895	123.139	109.877	101.01	91.6318	82.9963	78.3534	15.5059	13.897	12.3433	11.229	9.99394	9.00265	8.45193	1.55686	1.56838	2.18248	2.10218	1.98912	1.99166	1.92763	34.5187	33.8146	32.8807	32.9448	33.1589	31.7584	30.0813	2.5258	2.49665	2.17559	2.12692	2.1028	1.90984	1.78155	2.5258	2.49665	2.17559	2.12692	2.1028
IRL	7.2	Road transport, heavy duty vehicles	0.0463536	0.0443138	0.0426415	0.0400439	0.0374231	0.0350017	0.030896	3.4276	3.52831	3.51727	3.44508	3.36941	3.16508	2.58329	0.960263	0.939569	0.873125	0.792387	0.711255	0.622819	0.48186	0.00597337	0.00627202	0.00679072	0.00706565	0.00729881	0.00698959	0.00573738	16.1127	16.5193	16.4411	16.2949	16.0968	15.1549	12.3713	0.426564	0.418326	0.373447	0.342847	0.312584	0.276398	0.216218	0.426564	0.418326	0.373447	0.342847	0.312584
IRL	7.3	Road transport, mopeds and motorcycles	0.0826584	0.0793679	0.0767547	0.0816616	0.0870806	0.0937747	0.0964104	13.2859	13.2628	11.3857	11.9587	11.9714	11.2899	10.5687	2.73729	2.31778	1.7392	1.65251	1.51842	1.40136	1.27493	0.000867351	0.000866775	0.000850213	0.000918459	0.000960737	0.00102959	0.000993355	0.181892	0.185914	0.176855	0.192705	0.200004	0.214543	0.207529	0.0346934	0.0286049	0.0230493	0.0217471	0.0204757	0.0205025	0.018815	0.0346934	0.0286049	0.0230493	0.0217471	0.0204757
IRL	7.4	Road transport, gasoline evaporation	0	0	0	0	0	0	0	0	0	0	0	0	0	0	1.53363	1.0984	0.87151	0.706672	0.658122	0.561468	0.409817	0	0	0	0	0	0	0	0	0	0	0	0	0	0	0	0	0	0	0	0	0	0	0	0	0	0
IRL	7.5	Road transport, wear	0	0	0	0	0	0	0	0	0	0	0	0	0	0	0	0	0	0	0	0	0	0	0	0	0	0	0	0	0	0	0	0	0	0	0	1.03908	1.09745	1.16946	1.23928	1.30614	1.30326	1.20943	0.555989	0.587195	0.625555	0.663014	0.698948
IRL	8.1	Air transport (<1000m)	0.0016	0.00164	0.00168	0.00177	0.00191	0.00191	0.00159	3.5731	3.59202	3.90644	4.08567	4.38429	4.18806	3.50409	0.233805	0.234992	0.255728	0.267443	0.286979	0.273993	0.229254	0	0	0	0	0	0	0	3.30042	3.3186	3.60679	3.77252	4.04841	3.86916	3.23718	0.0443132	0.0446258	0.0482772	0.05052	0.0542303	0.0520191	0.043513	0.0443132	0.0446258	0.0482772	0.05052	0.0542303
IRL	8.2	Rail transport	0.00735	0.00775	0.00691	0.00691	0.00748	0.00792	0.00695	0.433899	0.457492	0.408097	0.408097	0.441337	0.467726	0.410416	0.185957	0.196068	0.174899	0.174899	0.189144	0.200454	0.175893	0	0	0	0	0	0	0	1.43452	1.51252	1.34922	1.34922	1.45911	1.54636	1.35689	0.205261	0.216422	0.193055	0.193055	0.208779	0.221263	0.194152	0.194989	0.205591	0.183394	0.183394	0.198331
IRL	8.3	Navigation, non-international	0	0	0	0	0	0	0	0.00670028	0.00697736	0.00703845	0.000467756	0.000491303	0.000514851	0	0.13595	0.13038	0.121	0.00828924	0.00894852	0.00961369	0	0	0	0	0	0	0	0	1.62403	1.66125	1.647	0.107544	0.111019	0.114375	0	0.211158	0.217295	0.215	0.00957892	0.00990403	0.0102194	0	0.200353	0.206178	0.204	0.00907912	0.00938725
IRL	8.4	Mobile machinery, agriculture	0	0	0	0	0	0	0	3.80732	3.64868	3.91531	3.75005	3.51961	3.50349	2.94888	1.74931	1.67642	1.79893	1.72299	1.61712	1.60971	1.35489	0	0	0	0	0	0	0	11.8335	11.3405	12.1692	11.6556	10.9393	10.8892	9.16544	1.43032	1.37072	1.47089	1.4088	1.32223	1.31617	1.10782	1.35931	1.30268	1.39787	1.33887	1.25659
IRL	8.5	Mobile machinery, industry	0	0	0	0	0	0	0	0	0	0	0	0	0	0	0	0	0	0	0	0	0	0	0	0	0	0	0	0	0	0	0	0	0	0	0	0	0	0	0	0	0	0	0	0	0	0	0
IRL	8.6	Other mobile sources	0	0	0	0	0	0	0	0	0	0	0	0	0	0	0	0	0	0	0	0	0	0	0	0	0	0	0	0	0	0	0	0	0	0	0	0	0	0	0	0	0	0	0	0	0	0	0
IRL	9.1	Landfills	73.1627	64.0312	58.8408	62.8589	57.4285	53.6754	51.523	0	0	0	0	0	0	0	1.15743	1.01297	0.930861	0.994428	0.90852	0.849144	0.815097	0	0	0	0	0	0	0	0	0	0	0	0	0	0	0	0	0	0	0	0	0	0	0	0	0	0
IRL	9.2	Controlled waste incineration	0	0	0	0	0	0	0	0.00229747	0.00261905	0.002536	0.00245294	0.0019579	0.00146286	0.00149646	0.242875	0.276871	0.268091	0.259311	0.206978	0.154645	0.158197	0	0	0	0	0	0	0	0.0285543	0.032551	0.0315188	0.0304865	0.0243339	0.0181813	0.0185989	0.000229747	0.000261905	0.000253599	0.000245294	0.00019579	0.000146286	0.000149646	0.000131284	0.00014966	0.000144914	0.000140168	0.00011188
IRL	9.3	Other waste treatment	1.06527	1.11936	0.69217	0.70642	0.72067	0.73492	0.74918	0.0003384	0.000340515	0.000346507	0.0003525	0.0005358	0.0005358	0.0005358	3.12e-05	3.1395e-05	3.19475e-05	3.25e-05	4.94e-05	4.94e-05	4.94e-05	0	0	0	0	0	0	0	0.0007416	0.000746235	0.000759368	0.0007725	0.0011742	0.0011742	0.0011742	2.4528e-05	2.46813e-05	2.51157e-05	2.555e-05	3.8836e-05	3.8836e-05	3.8836e-05	1.4016e-05	1.41036e-05	1.43518e-05	1.46e-05	2.2192e-05
IRL	10.1	Livestock, Cattle	477.898	477.482	476.83	476.204	462.439	463.847	459.18	0	0	0	0	0	0	0	0	0	0	0	0	0	0	83.1757	82.0098	81.5375	80.7564	78.4575	77.5856	78.4254	0	0	0	0	0	0	0	0	0	0	0	0	0	0	0	0	0	0	0
IRL	10.2	Livestock, Poultry	5.43652	5.50018	5.55616	5.53832	5.34672	5.15512	4.96352	0	0	0	0	0	0	0	0	0	0	0	0	0	0	2.48758	2.67924	2.57157	2.39741	2.24754	2.09766	1.94778	0	0	0	0	0	0	0	0	0	0	0	0	0	0	0	0	0	0	0
IRL	10.3	Livestock, Sheep	41.1906	41.3335	39.0489	36.9222	33.7412	30.922	28.7606	0	0	0	0	0	0	0	0	0	0	0	0	0	0	2.00824	2.00574	1.93276	1.81705	1.66114	1.52214	1.41842	0	0	0	0	0	0	0	0	0	0	0	0	0	0	0	0	0	0	0
IRL	10.4	Livestock, Goats	0.03891	0.0384	0.03738	0.0343	0.03738	0.04557	0.05171	0	0	0	0	0	0	0	0	0	0	0	0	0	0	0.00662198	0.00653484	0.00636058	0.00583779	0.00636058	0.00775468	0.00880026	0	0	0	0	0	0	0	0	0	0	0	0	0	0	0	0	0	0	0
IRL	10.5	Livestock, Pigs	23.4993	23.1342	22.859	22.4875	21.5943	21.0847	21.2246	0	0	0	0	0	0	0	0	0	0	0	0	0	0	6.83515	6.74073	6.63418	6.66727	6.32632	6.25999	6.32682	0	0	0	0	0	0	0	0	0	0	0	0	0	0	0	0	0	0	0
IRL	10.6	Livestock, Other animals	1.42817	1.47365	1.61462	1.75536	1.80795	1.95127	1.99783	0	0	0	0	0	0	0	0	0	0	0	0	0	0	1.36403	1.40767	1.5425	1.65718	1.71839	1.82569	1.82741	0	0	0	0	0	0	0	0	0	0	0	0	0	0	0	0	0	0	0
IRL	10.7	Crops and pastures	0	0	0	0	0	0	0	0	0	0	0	0	0	0	0	0	0	0	0	0	0	17.4494	17.2862	16.8394	16.963	15.1813	16.0764	15.8686	0	0	0	0	0	0	0	0	0	0	0	0	0	0	0	0	0	0	0
IRL	10.8	Agricultural waste burning	0	0	0	0	0	0	0	0	0	0	0	0	0	0	0	0	0	0	0	0	0	0	0	0	0	0	0	0	0	0	0	0	0	0	0	0	0	0	0	0	0	0	0	0	0	0	0
IRL	10.9	Rice cultivation	0	0	0	0	0	0	0	0	0	0	0	0	0	0	0	0	0	0	0	0	0	0	0	0	0	0	0	0	0	0	0	0	0	0	0	0	0	0	0	0	0	0	0	0	0	0	0
IRL	10.10	Storage and handling of agricultural products	0	0	0	0	0	0	0	0	0	0	0	0	0	0	0	0	0	0	0	0	0	0	0	0	0	0	0	0	0	0	0	0	0	0	0	0.0536725	0.062525	0.0484975	0.0520775	0.049925	0.059425	0.04968	0.0085876	0.010004	0.0077596	0.0083324	0.007988
IRL	10.11	Other agriculture	0	0	0	0	0	0	0	0	0	0	0	0	0	0	0	0	0	0	0	0	0	0	0	0	0	0	0	0	0	0	0	0	0	0	0	0	0	0	0	0	0	0	0	0	0	0	0
ITA	1.1	Power plants	4.45441	4.46928	4.43106	4.49488	4.34871	4.24126	3.95065	29.849	29.437	30.1498	30.6358	31.3966	29.7151	25.0707	4.34793	4.12385	4.10099	4.15209	4.13471	3.87135	3.25911	0.178219	0.212561	0.204031	0.203266	0.207283	0.206674	0.184825	122.883	111.109	83.7153	78.3605	67.9982	58.75	49.8877	6.5	6.0908	3.50524	3.21771	2.34857	2.02072	1.68738	6.175	5.78626	3.32998	3.05682	2.23114
ITA	1.2	Refineries	0.64446	0.64488	0.66901	0.66818	0.69936	0.69566	0.64892	5.27518	4.7497	4.63706	4.61472	5.12366	4.30783	3.85084	25.0753	27.7818	27.2169	25.3304	27.2064	23.076	20.9288	0	0	0	0	0	0	0	32.6991	31.4836	30.7865	29.0032	29.3489	26.3924	24.6275	2.2313	2.0509	2.08475	2.01193	1.66174	1.33658	1.33018	2.15065	1.97907	2.01213	1.94121	1.60938
ITA	2.1	Residential combustion (including commercial/institutional)	20.4712	23.7678	22.9159	24.6012	29.5217	30.9639	33.4318	292.318	341.15	323.093	349.508	434.155	454.191	493.252	62.749	76.152	73.1592	77.9781	94.4726	98.8697	105.627	0.282522	0.332755	0.308561	0.335733	0.429755	0.449856	0.491083	67.3314	70.8361	73.7892	71.5656	69.9801	73.4687	75.8031	33.9223	39.6691	37.0262	40.0322	50.4845	52.6997	57.3147	33.3945	39.2056	36.5949	39.6244	50.0331
ITA	2.2	Agricultural stationary combustion	2.39622	2.76515	2.61644	2.84676	3.5159	3.66298	3.96443	31.8935	38.0708	35.1786	38.6266	50.1749	52.4122	57.0548	6.0486	7.19467	6.6166	7.23383	9.4054	9.82416	10.6955	0.0352571	0.0417073	0.0380285	0.0413037	0.0537866	0.0561731	0.0611295	0.86364	1.00681	1.11256	1.34675	1.58416	1.77218	2.05427	1.79562	2.158	2.00276	2.21328	2.879	3.00774	3.27402	1.79562	2.158	2.00276	2.21328	2.879
ITA	34.1	Iron and steel industry (including coke ovens)	6.36379	6.43181	7.26498	7.09121	7.01014	6.84319	4.03043	88.0393	92.6274	98.9331	103.09	86.4964	83.2199	49.7713	5.51203	5.88845	6.17867	6.58599	6.57967	6.43623	4.66083	0	0	0	0	0	0	0	11.9154	12.3277	12.1022	13.2476	10.9019	11.0435	6.99276	7.0248	7.45343	7.77539	8.30042	8.24102	7.82271	5.50389	5.73514	6.08176	6.34612	6.7701	6.71756
ITA	34.2	Non-ferrous metal industry	0.02601	0.02492	0.02405	0.0245	0.02337	0.02228	0.02018	25.9514	26.4887	26.1263	26.2974	24.7167	25.2428	22.442	0.0958325	0.0978165	0.0964784	0.0971101	0.0912729	0.0932156	0.0828731	0	0	0	0	0	0	0	0.542346	0.552468	0.541729	0.546552	0.554205	0.522898	0.53891	0.455567	0.362031	0.394758	0.312757	0.299724	0.343099	0.31147	0.27334	0.217219	0.236855	0.187654	0.179834
ITA	34.3	Chemical industry	0.64752	0.68001	0.67434	0.64644	0.6364	0.52939	0.45602	14.4705	13.6158	13.6824	17.2797	11.8786	10.9918	11.7361	4.41026	4.02106	3.82081	3.77119	3.79596	3.61473	3.4401	0.208271	0.19472	0.187585	0.165493	0.158646	0.159318	0.152341	3.07928	3.61509	3.41451	3.1381	3.18193	2.6505	2.32136	0.7189	0.732221	0.730957	0.717905	0.676402	0.67026	0.624045	0.329266	0.330636	0.331772	0.336189	0.305299
ITA	34.4	Paper and pulp industry	0.10707	0.11078	0.10375	0.11357	0.1243	0.11536	0.07726	0	0	0	0	0	0	0	1.6836	1.8351	1.7671	1.86721	1.80452	1.675	1.35	0	0	0	0	0	0	0	0.220741	0.185515	0.13375	0.134437	0.137225	0.104	0.039	0.02322	0.02052	0.01242	0.012717	0.0121932	0	0	0.003483	0.003078	0.001863	0.00190755	0.00182898
ITA	34.5	Cement industry	0	0	0	0	0	0	0	0	0	0	0	0	0	0	0	0	0	0	0	0	0	0	0	0	0	0	0	0	0	0	0	0	0	0	0	5.90087	6.12625	6.14781	6.23811	6.14001	5.52995	4.70175	0.88513	0.918938	0.922172	0.935716	0.921002
ITA	34.6	Other non-metallic minerals industry	0	0	0	0	0	0	0	20.1	22.8	23.7	20.575	20.883	20.8	11.5236	11.5617	11.8611	10.9364	10.882	9.57532	8.61711	8.31767	0.562	0.228	0.344	0.4616	0.30686	0.2867	0.1174	0	0	0	0	0	0	0	5.16958	5.34707	5.04437	5.11217	4.6031	4.16986	3.82559	0.775437	0.80206	0.756656	0.766825	0.690465
ITA	34.7	Storage and handling in industry	0	0	0	0	0	0	0	0	0	0	0	0	0	0	0	0	0	0	0	0	0	0	0	0	0	0	0	0	0	0	0	0	0	0	0	0	0	0	0	0	0	0	0	0	0	0	0
ITA	34.8	Other industries	2.49875	2.51982	2.50412	2.50649	2.48541	2.35575	2.01017	294.515	286.926	326.151	322.747	267.135	282.591	154.958	33.0714	32.8743	35.484	38.1088	36.7232	33.687	33.8158	0.879366	2.83426	3.42093	2.25175	1.61765	1.79284	1.48496	139.651	135.625	148.236	145.559	146.826	127.67	102.276	23.4124	21.9357	20.3884	20.1549	18.4757	17.7615	11.969	22.2306	20.828	19.3585	19.1366	17.5408
ITA	5.1	Coal production	4.50138	3.04545	3.27039	2.56138	3.99904	3.45363	2.12281	0	0	0	0	0	0	0	0.75	0.294	0.285	0.063	0.474	0.351	0.216	0	0	0	0	0	0	0	0	0	0	0	0	0	0	0.666351	0.765104	0.763812	0.781389	0.791343	0.784791	0.628394	0.666351	0.765104	0.763812	0.781389	0.791343
ITA	5.2	Oil production	275.945	268.79	268.312	242.19	235.426	238.151	232.281	0	0	0	0	0	0	0	1.85498	1.81338	2.03489	1.9251	1.95132	1.74597	1.52295	0	0	0	0	0	0	0	0	0	0	0	0	0	0	0	0	0	0	0	0	0	0	0	0	0	0
ITA	5.3	Gas production	38.1874	34.1198	31.2513	28.5757	28.1313	28.8514	28.5382	0.52961	0.588611	0.601221	0.589687	0.475052	0.464824	0.378626	29.9605	29.539	30.1677	28.0789	25.3396	27.0933	27.8727	0	0	0	0	0	0	0	1.65172	1.89242	2.37242	2.68103	1.57429	1.60083	1.25964	0.0331006	0.0358935	0.0256293	0.0295697	0.0256208	0.0265918	0.0265889	0.0331006	0.0358935	0.0256293	0.0295697	0.0256208
ITA	5.4	Gasoline distribution	0	0	0	0	0	0	0	0	0	0	0	0	0	0	22.3258	21.3513	21.3915	20.764	20.2617	19.5811	19.1182	0	0	0	0	0	0	0	0	0	0	0	0	0	0	0	0	0	0	0	0	0	0	0	0	0	0
ITA	5.5	Flaring	0	0	0	0	0	0	0	0	0	0	0	0	0	0	0.269075	0.274413	0.280849	0.275614	0.279856	0.263075	0.240965	0	0	0	0	0	0	0	0.287283	0.292982	0.299853	0.294264	0.298794	0.280877	0.257271	0	0	0	0	0	0	0	0	0	0	0	0
ITA	6.1	Solvent and other product use	0	0	0	0	0	0	0	0	0	0	0	0	0	0	495.377	496.971	494.716	505.593	501.627	482.719	455.506	0	0	0	0	0	0	0	0	0	0	0	0	0	0	0.0202028	0.0191502	0.0167351	0.0171375	0.0176438	0.0177478	0.02165	0.0202028	0.0191502	0.0167351	0.0171375	0.0176438
ITA	7.1	Road transport, light duty vehicles	8.88667	7.36782	5.96267	5.49537	5.04238	4.56403	4.21312	1846.07	1541.97	1204.53	1004.89	877.079	751.26	672.774	198.427	164.189	126.466	107.09	92.7861	79.3075	70.1077	16.6922	15.9606	14.7139	14.0623	12.4804	10.9417	9.95999	379.028	364.496	332.974	325.711	318.268	293.284	280.541	23.4482	23.1191	20.4743	19.2928	19.2821	17.3647	16.5193	23.4482	23.1191	20.4743	19.2928	19.2821
ITA	7.2	Road transport, heavy duty vehicles	0.88468	0.855781	0.830316	0.755888	0.683153	0.606642	0.546245	68.5044	66.9279	63.709	58.8257	61.377	58.9883	52.5857	19.5488	17.9363	17.1073	16.8187	15.4996	14.3629	12.0353	0.0877239	0.086627	0.0824514	0.0803675	0.0809215	0.0823446	0.0763822	301.121	293.599	268.904	250.747	255.568	248.725	222.063	9.54619	8.89694	7.83138	7.0726	7.03925	6.54066	5.51399	9.54619	8.89694	7.83138	7.0726	7.03925
ITA	7.3	Road transport, mopeds and motorcycles	11.5161	10.9166	10.3762	9.91093	9.48173	9.01757	8.83587	617.905	606.009	559.189	554.262	535.238	512.28	497.897	256.784	242.218	221.945	208.804	195.381	182.841	172.81	0.0516472	0.0527649	0.0565357	0.058755	0.0610013	0.0620469	0.0639395	8.4326	8.87729	8.91907	9.23681	9.53503	9.64887	9.87816	3.85173	3.6665	3.44321	3.24825	3.06514	2.88837	2.75141	3.85173	3.6665	3.44321	3.24825	3.06514
ITA	7.4	Road transport, gasoline evaporation	0	0	0	0	0	0	0	0	0	0	0	0	0	0	55.7746	43.0811	31.9719	26.8706	23.8657	21.6623	20.2376	0	0	0	0	0	0	0	0	0	0	0	0	0	0	0	0	0	0	0	0	0	0	0	0	0	0
ITA	7.5	Road transport, wear	0	0	0	0	0	0	0	0	0	0	0	0	0	0	0	0	0	0	0	0	0	0	0	0	0	0	0	0	0	0	0	0	0	0	0	9.75748	9.82424	9.75815	9.73077	9.96793	9.73192	9.55557	5.32526	5.37136	5.34114	5.32988	5.46723
ITA	8.1	Air transport (<1000m)	0.09591	0.1022	0.11175	0.09837	0.07154	0.06613	0.06586	7.12195	7.14009	7.31334	7.46476	7.13494	6.83241	6.43096	2.30945	2.47819	2.7065	2.60739	2.03227	1.9469	1.83195	0	0	0	0	0	0	0	12.7191	11.6514	11.2889	11.7759	12.5594	12.004	11.3145	0.135246	0.126371	0.126706	0.131822	0.138485	0.132232	0.124725	0.135246	0.126371	0.126706	0.131822	0.138485
ITA	8.2	Rail transport	0.0216	0.0207	0.01746	0.02016	0.0189	0.0126	0.0108	1.284	1.2305	1.0379	1.1984	1.1235	0.749	0.642	0.558	0.53475	0.45105	0.5208	0.48825	0.3255	0.279	0.00084	0.000805	0.000679	0.000784	0.000735	0.00049	0.00042	4.752	4.554	3.8412	4.4352	4.158	2.772	2.376	0.5496	0.5267	0.44426	0.51296	0.4809	0.3206	0.2748	0.5496	0.5267	0.44426	0.51296	0.4809
ITA	8.3	Navigation, non-international	0	0	0	0	0	0	0	12.2705	11.732	11.7326	11.7028	11.6666	11.108	10.5465	2.16927	2.076	2.08	1.9594	1.85407	1.67965	1.52338	0.0149395	0.0149824	0.015	0.014442	0.0133181	0.0129555	0.0125033	71.5712	71.6662	71.702	68.6045	64.9778	64.1633	62.417	3.85819	3.87049	4.004	3.84358	3.65264	3.49193	3.40844	2.71713	2.72589	2.821	2.70822	2.57391
ITA	8.4	Mobile machinery, agriculture	0	0	0	0	0	0	0	62.4431	59.4673	58.0776	54.9238	50.7428	49.7244	47.9635	20.709	19.0054	18.0022	16.1177	14.1387	13.1741	12.58	0.0155252	0.0151993	0.0152081	0.0150905	0.0142962	0.013916	0.0140585	90.678	83.2134	77.6902	71.5742	62.561	55.7724	54.8222	13.4405	11.9127	10.6721	9.35228	7.68529	6.33562	5.93004	13.4405	11.9127	10.6721	9.35228	7.68529
ITA	8.5	Mobile machinery, industry	0	0	0	0	0	0	0	14.637	14.64	14.6182	14.6069	14.5957	14.5844	14.5731	5.248	4.90117	4.55434	4.19683	4.13571	4.06236	3.98535	0.00675169	0.00675169	0.00675169	0.00675169	0.00675169	0.00675169	0.00675169	34.8803	31.8366	28.7929	25.6556	24.9507	24.1048	23.2166	3.96125	3.42053	2.87981	2.32245	2.14955	1.94207	1.72422	3.96125	3.42053	2.87981	2.32245	2.14955
ITA	8.6	Other mobile sources	0.09797	0.13551	0.16043	0.12732	0.11355	0.07381	0.07295	44.6517	54.4464	66.4537	51.0268	44.7135	24.5179	19.4482	5.07318	5.78431	6.21474	4.68813	4.051	3.26318	2.89248	0.000661329	0.00150635	0.00159298	0.00128897	0.00122483	0.00101419	0.00118833	5.99223	12.1628	12.8724	10.5739	9.90734	8.57829	10.1773	0.781271	1.50894	1.60134	1.31961	1.22891	1.07275	1.27184	0.781271	1.50894	1.60134	1.31961	1.22891
ITA	9.1	Landfills	800.287	746.315	738.777	707.205	675.893	636.399	606.729	0	0	0	0	0	0	0	10.5408	9.82988	9.7306	9.31476	8.90234	8.38216	7.99137	8.54612	7.96976	7.88927	7.55212	7.21775	6.79599	6.47916	0	0	0	0	0	0	0	0	0	0	0	0	0	0	0	0	0	0	0
ITA	9.2	Controlled waste incineration	12.8493	16.1984	14.1413	13.4672	12.8876	13.4309	13.5942	0.0913324	0.0841155	0.102355	0.114462	0.0987508	0.103705	0.103712	1.25042	1.16067	1.44275	1.62491	1.44858	1.51497	1.51507	0	0	0	0	0	0	0	0.415287	0.380257	0.43805	0.468587	0.419458	0.433402	0.433428	0.0382039	0.0350359	0.0432771	0.0470995	0.040426	0.0424582	0.0424613	0.0382039	0.0350359	0.0432771	0.0470995	0.040426
ITA	9.3	Other waste treatment	123.229	126.727	129.87	130.613	130.99	129.827	129.881	268.664	338.714	295.641	281.277	269.283	280.515	283.843	13.144	16.4905	14.4726	13.8203	13.2536	13.7803	13.9437	2.99208	1.70925	1.88779	1.68525	1.79327	1.88965	2.38009	14.7371	17.1873	15.2569	14.4457	13.9413	14.493	15.097	11.6497	14.5168	13.0043	12.4656	11.9757	12.393	12.3931	9.98554	12.443	11.1467	10.6849	10.265
ITA	10.1	Livestock, Cattle	502.995	488.702	488.877	472.719	492.722	485.143	478.416	0	0	0	0	0	0	0	0	0	0	0	0	0	0	203.014	195.143	192.963	188.122	197.135	194.897	194.945	0	0	0	0	0	0	0	2.64771	2.55895	2.53917	2.50284	2.58093	2.55115	2.56707	1.72436	1.66672	1.65376	1.62985	1.68092
ITA	10.2	Livestock, Poultry	18.6486	18.3624	18.2789	17.3401	18.3684	18.8086	19.089	0	0	0	0	0	0	0	0	0	0	0	0	0	0	41.5284	40.7028	38.4612	36.3221	38.3821	39.9235	40.2138	0	0	0	0	0	0	0	9.70469	9.28498	9.15492	8.43547	9.30261	9.85048	10.0694	1.26143	1.20655	1.18965	1.09573	1.20918
ITA	10.3	Livestock, Sheep	65.3373	66.6115	65.3635	67.607	67.6849	67.1798	65.8441	0	0	0	0	0	0	0	0	0	0	0	0	0	0	5.36912	5.47383	5.37127	5.55564	5.56204	5.52053	5.41077	0	0	0	0	0	0	0	0	0	0	0	0	0	0	0	0	0	0	0
ITA	10.4	Livestock, Goats	4.94434	5.03176	4.86666	4.91513	4.73387	4.92507	4.94412	0	0	0	0	0	0	0	0	0	0	0	0	0	0	0.648938	0.660411	0.638742	0.645104	0.621313	0.646408	0.648908	0	0	0	0	0	0	0	0	0	0	0	0	0	0	0	0	0	0	0
ITA	10.5	Livestock, Pigs	83.6656	81.6015	83.0348	81.6933	80.3269	78.1016	75.2812	0	0	0	0	0	0	0	0	0	0	0	0	0	0	48.1294	47.268	48.6794	49.0918	48.9124	48.9426	48.7603	0	0	0	0	0	0	0	3.54272	3.48997	3.60409	3.63864	3.62957	3.6265	3.61571	0.580467	0.571815	0.590546	0.596159	0.594693
ITA	10.6	Livestock, Other animals	5.82043	5.72435	5.75239	5.92915	6.52473	6.86965	7.13174	0	0	0	0	0	0	0	0	0	0	0	0	0	0	12.5373	12.9384	13.4135	13.3247	13.9133	13.2339	13.5668	0	0	0	0	0	0	0	0.0770821	0.075908	0.0764094	0.0787387	0.0866948	0.0912619	0.0950714	0.0513881	0.0506053	0.0509396	0.0524924	0.0577965
ITA	10.7	Crops and pastures	0	0	0	0	0	0	0	0	0	0	0	0	0	0	0	0	0	0	0	0	0	93.3715	95.6023	87.0986	90.8069	90.4748	82.6733	66.0269	0	0	0	0	0	0	0	0	0	0	0	0	0	0	0	0	0	0	0
ITA	10.8	Agricultural waste burning	4.3632	4.4536	4.544	4.544	4.544	4.544	4.544	0.179697	0.228303	0.2178	0.198137	0.198855	0.198855	0.198051	1.1172	1.1386	1.16	1.1618	1.1636	1.1654	1.1672	0.3012	0.3056	0.31	0.3118	0.3136	0.3154	0.3172	0.3192	0.3246	0.33	0.3314	0.3328	0.3342	0.3356	1.20286	1.22777	1.25268	1.25268	1.25268	1.25268	1.25268	1.06135	1.08333	1.10531	1.10531	1.10531
ITA	10.9	Rice cultivation	69.6901	73.0461	70.1085	70.3171	72.5238	66.4787	75.1744	0	0	0	0	0	0	0	0	0	0	0	0	0	0	0	0	0	0	0	0	0	0	0	0	0	0	0	0	0	0	0	0	0	0	0	0	0	0	0	0
ITA	10.10	Storage and handling of agricultural products	0	0	0	0	0	0	0	0	0	0	0	0	0	0	0	0	0	0	0	0	0	0	0	0	0	0	0	0	0	0	0	0	0	0	0	0	0	0	0	0	0	0	0	0	0	0	0
ITA	10.11	Other agriculture	0	0	0	0	0	0	0	0	0	0	0	0	0	0	0	0	0	0	0	0	0	0	0	0	0	0	0	0	0	0	0	0	0	0	0	0	0	0	0	0	0	0	0	0	0	0	0
LUX	1.1	Power plants	0.06196	0.07007	0.06533	0.06962	0.06835	0.06686	0.0676	0.365515	0.431473	0.4494	0.471647	0.416019	0.386118	0.535437	0.0544	0.0572	0.06	0.0612	0.0624	0.0636	0.0648	0	0	0	0	0	0	0	0.5568	0.6784	0.8	0.7752	0.7504	0.7268	0.7024	0.001062	0.001416	0.00177	0.0017808	0.0017916	0.0018024	0.0018132	0.001062	0.001416	0.00177	0.0017808	0.0017916
LUX	1.2	Refineries	0	0	0	0	0	0	0	0	0	0	0	0	0	0	0	0	0	0	0	0	0	0	0	0	0	0	0	0	0	0	0	0	0	0	0	0	0	0	0	0	0	0	0	0	0	0	0
LUX	2.1	Residential combustion (including commercial/institutional)	0.38296	0.39621	0.38469	0.38354	0.35222	0.37799	0.38413	4.47152	3.97017	3.71946	3.30869	3.05545	2.93588	2.71918	0.449155	0.446155	0.444755	0.446155	0.447555	0.448955	0.450355	0	0	0	0	0	0.00105098	0.00210195	0.89625	0.84365	0.79225	0.79385	0.79545	0.79705	0.79865	0.197024	0.19764	0.197261	0.197089	0.196917	0.196745	0.196573	0.187868	0.187667	0.187595	0.18752	0.187445
LUX	2.2	Agricultural stationary combustion	0.00299	0.00289	0.00293	0.00301	0.00321	0.003	0.0046	0	0	0	0	0	0	0	0	0	0	0	0	0	0	0	0	0	0	0	0	0	0	0	0	0	0	0	0	0	0	0	0	0	0	0	0	0	0	0	0
LUX	34.1	Iron and steel industry (including coke ovens)	0.00749	0.01027	0.00901	0.01028	0.00978	0.00922	0.00585	4.48354	4.52323	4.37303	4.5799	4.52715	4.43649	4.39718	0	0	0	0	0	0	0	0	0	0	0	0	0	0	0	0	0	0	0	0	0	0.532717	0.500943	0.46917	0.468524	0.467878	0.467231	0.466585	0.435376	0.409283	0.38319	0.382661	0.382133
LUX	34.2	Non-ferrous metal industry	0.00082	0.00093	0.0009	0.00099	0.00093	0.00091	0.00079	0	0	0	0	0	0	0	0	0	0	0	0	0	0	0	0	0	0	0	0	0	0	0	0	0	0	0	0	0	0	0	0	0	0	0	0	0	0	0	0
LUX	34.3	Chemical industry	0.00464	0.00499	0.00482	0.00432	0.00372	0.00343	0.00247	0.00206959	0.0023353	0.00206933	0.00254409	0.00208079	0.00188815	0.00168431	0	0	0	0	0	0.0012	0.0016	0	0	0	0	0	0	0	0	0	0	0	0.0016	0.0024	0.0032	0	0	0	0	0	0	0	0	0	0	0	0
LUX	34.4	Paper and pulp industry	0.00079	0.00079	0.00066	0.00042	0.00028	0.00028	0.00031	0	0	0	0	0	0	0	0	0	0	0	0	0	0	0	0	0	0	0	0	0	0	0	0	0	0	0	0	0	0	0	0	0	0	0	0	0	0	0	0
LUX	34.5	Cement industry	0	0	0	0	0	0	0	0	0	0	0	0	0	0	0	0	0	0	0	0	0	0	0	0	0	0	0	0	1.31	1.31	1.31	1.096	0.882	0.668	0.454	0.198713	0.198767	0.19882	0.195462	0.192104	0.188747	0.185389	0.175329	0.175375	0.17542	0.172459	0.169498
LUX	34.6	Other non-metallic minerals industry	0	0	0	0	0	0	0	0.362809	0.409389	0.362762	0.445991	0.364771	0.331001	0.295266	0	0	0	0	0	0	0	0	0	0	0	0	0	0	0	0	0	0	0	0	0	0	0	0	0	0	0	0	0	0	0	0	0
LUX	34.7	Storage and handling in industry	0	0	0	0	0	0	0	0	0	0	0	0	0	0	0	0	0	0	0	0	0	0	0	0	0	0	0	0	0	0	0	0	0	0	0	0.126556	0.123723	0.12089	0.120892	0.120894	0.120897	0.120899	0.01409	0.013935	0.01378	0.0137818	0.0137836
LUX	34.8	Other industries	0.06381	0.07199	0.09939	0.10111	0.09288	0.08886	0.07341	0.254215	0.286853	0.254182	0.312499	0.25559	0.231928	0.206889	0.0436	0.0418	0.04	0.0388	0.0392	0.0388	0.0384	0	0	0	0	0	8.67749e-06	1.7355e-05	1.61	1.6	1.59	1.4074	1.226	1.044	0.862	0.178715	0.177363	0.17519	0.173506	0.171822	0.169163	0.16758	0.0469624	0.0452078	0.04448	0.04244	0.0404
LUX	5.1	Coal production	0	0	0	0	0	0	0	0	0	0	0	0	0	0	0	0	0	0	0	0	0	0	0	0	0	0	0	0	0	0	0	0	0	0	0	0	0	0	0	0	0	0	0	0	0	0	0
LUX	5.2	Oil production	0	0	0	0	0	0	0	0	0	0	0	0	0	0	0.0116	0.0108	0.01	0.0106	0.0112	0.0118	0.0124	0	0	0	0	0	0	0	0	0	0	0	0	0	0	0	0	0	0	0	0	0	0	0	0	0	0
LUX	5.3	Gas production	1.93554	2.14629	2.11184	2.21637	2.07354	1.98265	2.00386	0	0	0	0	0	0	0	0.2024	0.2006	0.2	0.2004	0.2008	0.2012	0.2016	0	0	0	0	0	0	0	0	0	0	0	0	0	0	0	0	0	0	0	0	0	0	0	0	0	0
LUX	5.4	Gasoline distribution	0	0	0	0	0	0	0	0	0	0	0	0	0	0	0.5424	0.5262	0.51	0.5074	0.5048	0.5022	0.4996	0	0	0	0	0	0	0	0	0	0	0	0	0	0	0	0	0	0	0	0	0	0	0	0	0	0
LUX	5.5	Flaring	0	0	0	0	0	0	0	0	0	0	0	0	0	0	0	0	0	0	0	0	0	0	0	0	0	0	0	0	0	0	0	0	0	0	0	0	0	0	0	0	0	0	0	0	0	0	0
LUX	6.1	Solvent and other product use	0	0	0	0	0	0	0	0	0	0	0	0	0	0	1.9676	1.8912	1.82	1.769	1.7192	1.6688	1.6184	0	0	0	0	0	0	0	0	0	0	0	0	0	0	0	0	0	0	0	0	0	0	0	0	0	0
LUX	7.1	Road transport, light duty vehicles	0.399595	0.378014	0.328209	0.28301	0.237976	0.210618	0.185171	5.00765	4.42481	3.83793	3.28051	3.6722	3.11215	2.39247	6.422	5.851	5.28	4.7674	4.2548	3.7422	3.2296	0.26691	0.236627	0.205045	0.18454	0.148157	0.114702	0.0812465	13.6104	14.5052	15.4	14.9468	14.4952	14.0428	13.5904	0.775407	0.909374	1.04334	1.01792	0.99251	0.967094	0.941679	0.773865	0.908602	1.04334	1.01792	0.99251
LUX	7.2	Road transport, heavy duty vehicles	0.173013	0.172146	0.159669	0.134935	0.110635	0.0957213	0.0810319	0.983905	0.86939	0.754079	0.644556	0.721516	0.611476	0.470075	1.3532	1.3508	1.35	1.1942	1.0384	0.8838	0.7284	0.00132846	0.00130659	0.00119611	0.0013749	0.00144808	0.00121464	0.000981192	28.8888	29.4444	30	27.8946	25.7892	23.6838	21.5784	0.73645	0.72769	0.71893	0.641509	0.564087	0.486666	0.409244	0.73645	0.72769	0.71893	0.641509	0.564087
LUX	7.3	Road transport, mopeds and motorcycles	0.0336616	0.0312994	0.0266116	0.0245949	0.0223792	0.0216905	0.0212076	0.836684	0.739304	0.641247	0.548112	0.613556	0.519982	0.399738	1.7244	1.5922	1.46	1.331	1.202	1.073	0.944	0.000151551	0.000161973	0.000148389	0.000168777	0.000172323	0.000111106	4.98897e-05	0.0496	0.0548	0.06	0.0648	0.0696	0.0744	0.0792	0.0287492	0.0273496	0.02595	0.0240008	0.0220516	0.0201024	0.0181532	0.0287492	0.0273496	0.02595	0.0240008	0.0220516
LUX	7.4	Road transport, gasoline evaporation	0	0	0	0	0	0	0	0	0	0	0	0	0	0	2.048	1.729	1.41	1.2458	1.0816	0.9174	0.7532	0	0	0	0	0	0	0	0	0	0	0	0	0	0	0	0	0	0	0	0	0	0	0	0	0	0
LUX	7.5	Road transport, wear	0	0	0	0	0	0	0	0	0	0	0	0	0	0	0	0	0	0	0	0	0	0	0	0	0	0	0	0	0	0	0	0	0	0	0	0.78742	0.83121	0.875	0.87917	0.88334	0.887509	0.891679	0.281246	0.298723	0.3162	0.317909	0.319617
LUX	8.1	Air transport (<1000m)	1e-05	0	0	0	0	0	0	0	0	0	0	0	0	0	0.252	0.266	0.28	0.2814	0.2828	0.2842	0.2856	0	0	0	0	0	0	0	0.1268	0.1334	0.14	0.1414	0.1428	0.1442	0.1456	0.0062648	0.0066224	0.00698	0.007003	0.007026	0.007049	0.007072	0.0057688	0.0060994	0.00643	0.0064494	0.0064688
LUX	8.2	Rail transport	0.00099	0.00078	0.0005	0.00037	9e-05	0.001	0.00058	0.00756714	0.00918909	0.01	0.00999552	0.00918453	0.00918453	0.00831329	0.022	0.011	0	0.0014	0.0028	0.0042	0.0056	0	0	0	0	0	3.78846e-05	7.57693e-05	0.1572	0.0986	0.04	0.0408	0.0416	0.0424	0.0432	0.0141292	0.0090846	0.00404	0.003974	0.003908	0.003842	0.003776	0.0133812	0.0086006	0.00382	0.003759	0.003698
LUX	8.3	Navigation, non-international	0	0	0	0	0	0	0	0.00776389	0.009428	0.01026	0.0102554	0.00942332	0.00942332	0.00852944	0.0105336	0.0103968	0.01026	0.01026	0.01026	0.01026	0.01026	0	0	0	0	0	0	0	0.205398	0.203699	0.202	0.20115	0.200301	0.199451	0.198602	0.0141918	0.0140959	0.014	0.0138912	0.0137825	0.0136737	0.013565	0.0131815	0.0130907	0.013	0.0128964	0.0127927
LUX	8.4	Mobile machinery, agriculture	0	0	0	0	0	0	0	0.0416193	0.05054	0.055	0.0549754	0.0505149	0.0505149	0.0457231	0.036	0.033	0.03	0.0306	0.0312	0.0318	0.0324	0	0	0	0	0	0	0	0.248	0.239	0.23	0.2228	0.2156	0.2084	0.2012	0.0237492	0.0228096	0.02187	0.0210832	0.0202964	0.0195096	0.0187228	0.0224996	0.0216098	0.02072	0.0199744	0.0192288
LUX	8.5	Mobile machinery, industry	0	0	0	0	0	0	0	0.0537267	0.0652425	0.071	0.0709682	0.0652101	0.0652101	0.0590244	0.1108	0.1104	0.11	0.114	0.118	0.122	0.126	0	0	0	0	0	0	0.000778154	0.6868	0.6884	0.69	0.7044	0.7188	0.7332	0.7476	0.060044	0.059397	0.05875	0.0598566	0.0609632	0.0620698	0.0631764	0.0568852	0.0562726	0.05566	0.056708	0.057756
LUX	8.6	Other mobile sources	0	0	0	0	0	0	0	0	0	0	0	0	0	0	0.164	0.167	0.17	0.1724	0.1748	0.1772	0.1796	0	0	0	0	0	0	0	0	0	0	0	0	0	0	0	0	0	0	0	0	0	0	0	0	0	0
LUX	9.1	Landfills	2.56865	2.30144	2.18222	2.07215	2.00453	1.88726	1.78598	0	0	0	0	0	0	0	0	0	0	0	0	0	0	0	0	0	0	0	0	0	0	0	0	0	0	0	0	0	0	0	0	0	0	0	0	0	0	0	0
LUX	9.2	Controlled waste incineration	0	0	0	0	0	0	0	0	0	0	0	0	0	0	0	0	0	0	0	0	0	0	0	0	0	0	0	0	0	0	0	0	0	0	0	0	0	0	0	0	0	0	0	0	0	0	0
LUX	9.3	Other waste treatment	0.5013	0.48817	0.50132	0.54004	0.51959	0.54976	0.50391	0	0	0	0	0	0	0	1.0712	1.0506	1.03	1.0132	0.9964	0.9796	0.9628	0.00129895	0.00126011	0.00126011	0.00126011	0.00126011	0.00126011	0	0	0	0	0	0	0	0	0.065744	0.066442	0.06714	0.066214	0.065288	0.064362	0.063436	0.064644	0.065342	0.06604	0.065334	0.064628
LUX	10.1	Livestock, Cattle	13.881	13.6394	13.6574	13.6055	13.7399	14.1049	14.2761	0	0	0	0	0	0	0	0	0	0	0	0	0	0	4.18782	3.9677	3.9677	3.9677	3.9677	3.70028	3.43287	0	0	0	0	0	0	0	0.0445968	0.0438584	0.04312	0.042643	0.042166	0.041689	0.041212	0.0099092	0.0097446	0.00958	0.0094744	0.0093688
LUX	10.2	Livestock, Poultry	0.07107	0.06697	0.07438	0.07286	0.07166	0.07408	0.08751	0	0	0	0	0	0	0	0	0	0	0	0	0	0	0.0249498	0.0233955	0.0233955	0.0233955	0.0233955	0.0233955	0.0303255	0	0	0	0	0	0	0	0.0037224	0.0038312	0.00394	0.0041758	0.0044116	0.0046474	0.0048832	0	0	0	0	0
LUX	10.3	Livestock, Sheep	0.07732	0.07975	0.08412	0.07894	0.07644	0.06939	0.07223	0	0	0	0	0	0	0	0	0	0	0	0	0	0	0.018736	0.0200326	0.0200326	0.0200326	0.0200326	0.0151183	0.0102041	0	0	0	0	0	0	0	0	0	0	0	0	0	0	0	0	0	0	0
LUX	10.4	Livestock, Goats	0.00961	0.01028	0.01128	0.00998	0.0144	0.0149	0.01601	0	0	0	0	0	0	0	0	0	0	0	0	0	0	0.001029	0.001029	0.001029	0.001029	0.001029	0.0025312	0.0040334	0	0	0	0	0	0	0	0	0	0	0	0	0	0	0	0	0	0	0
LUX	10.5	Livestock, Pigs	1.76854	1.77845	1.8948	1.76878	1.74994	1.7104	1.68609	0	0	0	0	0	0	0	0	0	0	0	0	0	0	0.456478	0.612758	0.612758	0.612758	0.612758	0.566673	0.520589	0	0	0	0	0	0	0	0.0347652	0.0342476	0.03373	0.0345282	0.0353264	0.0361246	0.0369228	0.0061764	0.0060832	0.00599	0.0061332	0.0062764
LUX	10.6	Livestock, Other animals	0.06686	0.07146	0.08024	0.08255	0.08271	0.08598	0.08674	0	0	0	0	0	0	0	0	0	0	0	0	0	0	0.0389625	0.046075	0.046075	0.046075	0.046075	0.0452051	0.0443352	0	0	0	0	0	0	0	0	0	0	0	0	0	0	0	0	0	0	0
LUX	10.7	Crops and pastures	0	0	0	0	0	0	0	0	0	0	0	0	0	0	0	0	0	0	0	0	0	0	0	0	0	0	0.161646	0.323291	0	0	0	0	0	0	0	0	0	0	0	0	0	0	0	0	0	0	0
LUX	10.8	Agricultural waste burning	0	0	0	0	0	0	0	0	0	0	0	0	0	0	0	0	0	0	0	0	0	0	0	0	0	0	0	0	0	0	0	0	0	0	0	0	0	0	0	0	0	0	0	0	0	0	0
LUX	10.9	Rice cultivation	0	0	0	0	0	0	0	0	0	0	0	0	0	0	0	0	0	0	0	0	0	0	0	0	0	0	0	0	0	0	0	0	0	0	0	0	0	0	0	0	0	0	0	0	0	0	0
LUX	10.10	Storage and handling of agricultural products	0	0	0	0	0	0	0	0	0	0	0	0	0	0	0	0	0	0	0	0	0	0	0	0	0	0	0	0	0	0	0	0	0	0	0	0.0172808	0.0166054	0.01593	0.0161884	0.0164468	0.0167052	0.0169636	0.0029788	0.0028944	0.00281	0.0028558	0.0029016
LUX	10.11	Other agriculture	0	0	0	0	0	0	0	0	0	0	0	0	0	0	0	0	0	0	0	0	0	0	0	0	0	0	0	0	0	0	0	0	0	0	0	0	0	0	0	0	0	0	0	0	0	0	0
NLD	1.1	Power plants	3.69689	3.99871	4.31099	4.08044	3.8084	3.9307	4.20565	15.0883	8.09697	6.84928	5.15005	3.70135	4.10143	2.72541	0.509109	0.438749	0.503317	0.819209	0.346642	0.324075	0.281387	0.0649285	0.0953795	0.205331	0.0156604	0.0205151	0.0704687	0.0292319	48.2702	42.5289	41.2295	37.086	29.5344	25.4147	23.9913	0.466568	0.42505	0.502012	0.367254	0.306703	0.300424	0.326509	0.356789	0.331441	0.419978	0.281717	0.243134
NLD	1.2	Refineries	0.59358	0.62921	0.65437	0.65619	0.70137	0.66135	0.59115	3.92996	3.57614	4.77749	5.16754	3.96039	5.28271	5.68039	10.6183	10.6166	14.141	12.6746	10.9666	10.5643	9.637	0.003504	0.000474	0	0.000626	0.000571352	0	0	9.76392	9.34808	9.13143	10.0547	9.24101	8.52816	6.15012	2.82674	1.98878	1.64936	1.71237	1.44859	1.35599	0.545597	2.09794	1.07552	1.28143	0.963689	1.07865
NLD	2.1	Residential combustion (including commercial/institutional)	22.1914	21.7219	21.2374	20.8283	20.1085	21.8677	21.4577	56.1212	57.5181	58.3808	59.9799	60.6012	61.2708	60.8864	11.6331	11.0338	10.8864	11.1308	10.9625	11.0833	10.945	0	0	0	0	0	0.0001	0.003873	33.1517	31.4771	27.755	28.642	24.9872	26.6067	25.9259	1.74677	1.75158	1.73807	1.73768	1.77262	1.73282	1.70702	1.60946	1.63018	1.63012	1.63395	1.6525
NLD	2.2	Agricultural stationary combustion	8.50314	9.15932	11.1449	16.4998	28.1233	44.4414	45.1808	1.20911	1.24611	1.23202	1.14352	1.23774	1.36152	1.4187	1.43069	1.4692	1.44908	1.32955	1.43418	1.5801	1.56238	0	0	0	0	0	0	0.000345	11.7118	12.0979	12.1605	10.5728	10.8355	11.4317	10.7236	0.0295859	0.0851507	0.08424	0.0211605	0.022346	0.0236464	0.0234046	0.0275937	0.0714479	0.0705858	0.021132	0.0223106
NLD	34.1	Iron and steel industry (including coke ovens)	0.44011	0.54819	1.12596	0.63467	0.41679	0.35806	0.59628	64.5221	66.8251	68.2151	84.8622	75.1974	72.6818	64.3159	2.17461	1.81408	1.85704	1.39172	1.30888	1.26302	1.05234	0.0228195	0.0574122	0.0526853	0.0703732	0.0498387	0.0298569	0.0176368	12.9643	12.2692	12.0704	11.5564	11.2564	10.8139	9.34869	1.62023	1.64862	1.60968	1.60876	1.71734	1.48409	1.35429	1.01514	1.02645	1.01777	1.0359	1.10102
NLD	34.2	Non-ferrous metal industry	0.01995	0.0235	0.02305	0.02176	0.02514	0.02465	0.01767	43.0006	59.9695	48.7596	41.6416	42.9806	50.1837	23.6433	0.206465	0.054808	0.146891	0.201336	0.408865	0.418266	0.374789	0.0115229	0.0121228	0.0133406	0.00446296	0.00438546	0.0042835	0.00399707	0.405562	0.775693	0.596704	0.706897	0.785635	0.705884	0.617393	0.613188	0.595029	0.419558	0.390351	0.416045	0.384608	0.240109	0.410627	0.398531	0.281125	0.261509	0.278668
NLD	34.3	Chemical industry	14.103	13.3531	14.0203	13.2443	13.5068	12.7668	12.0392	21.311	24.3738	19.7722	19.2126	18.962	15.7793	11.7691	10.3865	10.7664	8.63266	8.5539	7.81503	7.71695	6.5417	1.60324	2.14719	1.45015	1.25958	1.06615	1.13424	0.86523	15.1747	15.2891	14.6392	13.9097	12.9582	13.084	11.5154	1.24733	1.3805	1.31744	1.27382	1.06949	0.903256	1.3392	0.937285	1.01858	0.992579	0.904439	0.802422
NLD	34.4	Paper and pulp industry	0.15921	0.15192	0.17479	0.16722	0.15583	0.1377	0.12886	2.37931	2.4524	2.26461	1.72872	1.66405	1.56344	1.54521	0.200529	0.112632	0.270572	0.396149	0.582036	0.451961	0.328003	0.021557	0.024028	0.022975	0.019655	0.016874	0.012169	0.009541	2.12219	1.98237	1.81742	1.71023	1.641	1.48389	1.25099	0.385884	0.38517	0.38492	0.384992	0.385459	0.385015	0.387172	0.128528	0.127816	0.127593	0.12767	0.128054
NLD	34.5	Cement industry	0	0	0	0	0	0	0	0	0.2425	0.2215	0	0	0	0	0	0	0	0	0	0	0	0	0	0	0	0	0	0	0	0	0	0	0	0	0	0	0.025334	0.049094	0.057815	0.051072	0.041811	0.032044	0	0.0112596	0.0218196	0.0256956	0.0226987
NLD	34.6	Other non-metallic minerals industry	0	0	0	0	0	0	0	0	0	0	0	0	0	0	0	0	0	0	0	0	0	0	0	0	0	0	0	0	0	0	0	0	0	0	0	0	0	0	0	0	0	0	0	0	0	0	0
NLD	34.7	Storage and handling in industry	0	0	0	0	0	0	0	1.33234	1.61125	1.65008	1.67176	1.72479	1.55512	3.41621	0.125428	0.245624	0.123555	0.0937847	0.179071	0.099315	0.2805	0.446544	0.403017	0.431311	0.442905	0.433529	0.073852	0.0645696	0.44715	0.491865	0.514223	0.517822	0.517304	0.52765	0.52765	1.08725	1.1852	1.15465	1.1924	1.1923	1.15021	1.15107	0.365937	0.471055	0.447467	0.481025	0.480985
NLD	34.8	Other industries	3.26511	3.14755	3.13876	3.16004	3.11204	3.16406	3.15576	6.52164	10.3553	10.3611	8.69825	9.00231	9.08363	9.50493	14.3812	12.4616	17.1994	17.8191	18.1849	20.375	18.0999	0.50093	0.498784	0.382669	0.366409	0.358032	0.746468	0.725416	9.63092	10.8452	10.635	10.3818	10.495	10.4555	9.66863	4.47204	4.43753	4.37446	4.26044	4.41619	4.4744	4.21963	1.25179	1.24644	1.101	1.11243	1.14141
NLD	5.1	Coal production	1.077	1.1025	1.1185	1.08197	1.086	1.0413	0.83786	0	0	0	0	0	0	0	0	0	0	0	0	0	0	0	0	0	0	0	0	0	0	0	0	0	0	0	0	0	0	0	0	0	0	0	0	0	0	0	0
NLD	5.2	Oil production	20.4755	19.1777	20.0076	17.6004	17.942	17.347	15.1526	0	0	0	0	0	0	0	6.10945	4.81967	4.96758	4.88254	6.12551	6.04483	6.35256	0	0	0	0	0	0	0	0	0	0	0	0	0	0	0	0	0	0	0	0	0	0	0	0	0	0
NLD	5.3	Gas production	24.9873	23.8597	25.3738	24.2247	27.0751	29.0697	28.669	0	0	0	0	0	0	0	1.30594	1.17364	1.48151	1.43942	1.51517	1.51703	1.51628	0	0	0	0	0	0	0	0	0	0	0	0	0	0	0	0	0	0	0	0	0	0	0	0	0	0
NLD	5.4	Gasoline distribution	0	0	0	0	0	0	0	0	0	0	0	0	0	0	0	0	0	0	0	0	0	0	0	0	0	0	0	0	0	0	0	0	0	0	0	0	0	0	0	0	0	0	0	0	0	0	0
NLD	5.5	Flaring	0	0	0	0	0	0	0	0	0	0	0	0	0	0	0	0	0	0	0	0	0	0	0	0	0	0	0	0	0	0	0	0	0	0	0	0	0	0	0	0	0	0	0	0	0	0	0
NLD	6.1	Solvent and other product use	0	0	0	0	0	0	0	0	0	0	0.016323	0.0208	0.001664	0	62.3596	60.239	60.7788	56.6107	57.7364	56.8144	53.7424	1.10655	1.10937	1.11283	1.12358	1.11577	1.11024	1.08609	0	0	0	0	0	0	0	1.12681	1.10653	1.13862	1.1844	1.25598	1.32855	1.24222	0.375605	0.368844	0.37954	0.394802	0.418661
NLD	7.1	Road transport, light duty vehicles	2.3919	2.2574	2.2082	2.17782	2.14248	2.15864	2.09271	309.9	300.721	283.825	270.341	262.022	263.637	254.537	27.9548	26.0952	23.8441	22.0853	21.0033	21.0852	20.2144	2.46495	2.48791	2.43359	2.4293	2.44902	2.43929	2.45496	70.2403	67.7775	62.8806	58.0288	54.956	52.6147	49.3152	4.74166	4.66139	4.50531	4.29739	4.18955	4.0584	3.77962	4.74166	4.66139	4.50531	4.29739	4.18955
NLD	7.2	Road transport, heavy duty vehicles	0.363498	0.326237	0.300728	0.276245	0.249748	0.227123	0.193791	14.8078	14.7623	15.0946	15.6751	16.7051	17.6852	17.6795	2.92478	2.44395	2.13958	1.82936	1.64361	1.44056	1.27029	0.0237464	0.0240376	0.024564	0.0252372	0.0260554	0.0268457	0.0262865	66.5254	66.4854	66.8904	66.5177	66.2132	64.9497	59.9412	1.81421	1.65407	1.56999	1.44942	1.33805	1.1977	0.983726	1.81421	1.65407	1.56999	1.44942	1.33805
NLD	7.3	Road transport, mopeds and motorcycles	0.454924	0.445937	0.455388	0.440642	0.424315	0.417299	0.393552	54.6034	54.3929	56.9151	56.3183	56.3559	55.796	54.3627	9.20007	8.66852	9.83296	9.27428	9.24133	9.13277	8.95005	0.00500802	0.00507354	0.00540629	0.00542698	0.00555265	0.0056995	0.0056581	0.533432	0.553197	0.583355	0.597115	0.61848	0.646319	0.668375	0.0707958	0.0680244	0.077064	0.0739721	0.0748626	0.0758231	0.076294	0.0707958	0.0680244	0.077064	0.0739721	0.0748626
NLD	7.4	Road transport, gasoline evaporation	0	0	0	0	0	0	0	0	0	0	0	0	0	0	7.29973	6.38446	5.43653	4.55153	3.8045	3.4013	3.00422	0	0	0	0	0	0	0	0	0	0	0	0	0	0	0	0	0	0	0	0	0	0	0	0	0	0
NLD	7.5	Road transport, wear	0	0	0	0	0	0	0	0	0	0	0	0	0	0	0	0	0	0	0	0	0	0	0	0	0	0	0	0	0	0	0	0	0	0	0	2.35467	2.41058	2.41719	2.43373	2.48303	2.54041	2.52302	0.393853	0.403213	0.40445	0.407268	0.415492
NLD	8.1	Air transport (<1000m)	0.00695	0.00695	0.00695	0.00695	0.00695	0.00695	0.00695	3.56139	3.59913	3.78988	3.98889	4.02937	4.04972	4.04586	0.21403	0.229002	0.244735	0.256753	0.257603	0.251592	0.238641	0.00183746	0.00195997	0.00208247	0.00212868	0.00214531	0.00212662	0.00195074	2.43268	2.59021	2.81284	2.92302	2.88435	2.86273	2.66826	0.0487824	0.0505288	0.0530988	0.0547899	0.0555938	0.0553485	0.051272	0.0377688	0.0391002	0.040857	0.0420443	0.0426936
NLD	8.2	Rail transport	0.00693	0.00735	0.00711	0.0065	0.00637	0.00597	0.00442	0.283936	0.301062	0.29109	0.266268	0.260934	0.244422	0.192183	0.0778605	0.0825568	0.0798222	0.0730156	0.071553	0.067025	0.053933	0.000324697	0.000344281	0.000332878	0.000304492	0.000298393	0.00027951	0.00020693	1.88117	1.99464	1.92857	1.76412	1.72878	1.61938	1.1577	0.0602937	0.0637749	0.0616277	0.0571084	0.0559323	0.0530447	0.0441038	0.05768	0.0610036	0.0589481	0.0546574	0.0535304
NLD	8.3	Navigation, non-international	0	0	0	0	0	0	0	5.90396	5.8926	5.81405	5.70169	5.66555	5.53565	5.36359	4.17379	3.91544	3.612	3.44717	3.341	3.14077	2.9116	0.00273582	0	0.007	0	0	0.0016419	0.00150087	47.237	43.2379	41.705	40.2735	40.7871	38.2492	34.7745	1.69447	1.5448	1.484	1.42531	1.43415	1.29644	1.17382	1.63738	1.49254	1.43356	1.37694	1.38553
NLD	8.4	Mobile machinery, agriculture	0	0	0	0	0	0	0	4.07036	3.92347	3.77808	3.74871	3.57258	3.32059	3.12986	1.7892	1.66144	1.57149	1.55077	1.44891	1.30569	1.19656	0.00334243	0.00331902	0.00329562	0.00345941	0.00345941	0.00336581	0.00336581	13.0063	12.5913	12.1994	12.4191	11.9295	11.0606	10.5059	0.840111	0.788443	0.739372	0.727938	0.677742	0.607362	0.557362	0.798628	0.749544	0.702927	0.692064	0.644378
NLD	8.5	Mobile machinery, industry	0	0	0	0	0	0	0	7.98751	7.46897	7.73388	7.83944	8.21354	8.84447	9.28209	1.89381	1.71834	1.67135	1.38924	1.25768	1.15272	0.938409	0.00383723	0.00381955	0.00402055	0.00380586	0.0040453	0.00429832	0.00402836	13.7911	12.8481	12.7333	10.7687	10.221	9.77776	8.03293	0.822003	0.747693	0.733676	0.611309	0.58896	0.58091	0.505531	0.780984	0.710389	0.697089	0.580856	0.559641
NLD	8.6	Other mobile sources	0.04249	0.04334	0.03582	0.0361	0.03036	0.04047	0.02523	44.6866	44.3439	44.0377	43.7108	43.3776	43.0897	42.8117	2.83789	2.74939	2.67807	2.57678	2.4928	2.42255	2.33763	0.000849049	0.000805009	0.00079002	0.000743104	0.000734186	0.000744541	0.000734972	6.29711	5.87696	5.57371	5.26092	5.09375	5.02576	4.89702	0.263995	0.231687	0.202964	0.177485	0.158363	0.144432	0.131989	0.253408	0.22267	0.195352	0.171096	0.152888
NLD	9.1	Landfills	323.287	308.71	288.384	269.556	252.242	234.047	220.803	0	0	0	0	0	0	0	0.812088	0.775811	0.725885	0.676809	0.633091	0.58596	0.553143	0	0	0	0	0	0	0	0	0	0	0	0	0	0	0	0	0	0	0	0	0	0	0	0	0	0
NLD	9.2	Controlled waste incineration	0	0	0	0	0	0	0	0.470855	0.518046	0.529446	0.519946	0.523548	0.524522	0.534255	0.0186129	0.0530851	0.0676554	0.0668566	0.0588448	0.0607105	0.0787812	0.004283	0.00124621	0.0405202	0.0523384	0.0517125	0.0457635	0.0469141	1.61228	1.59054	1.87149	1.89783	1.99263	2.23508	2.3232	0.0216311	0.0428526	0.033729	0.0461464	0.0333004	0.0380639	0.0238698	0.000999	0.0428526	0.033729	0.0454116	0.0333004
NLD	9.3	Other waste treatment	13.2903	13.7279	13.0107	12.6879	12.8598	12.4735	10.8453	0	0	0.009604	0.009632	0.01098	0	0	0.0552204	0.0584534	0.0593899	0.062927	0.061646	0.0620975	0.0589054	0.267539	0.362598	0.271686	0.263154	0.264736	0.252038	0.238657	0.004853	0.007621	0.007381	0.004021	0.004853	0.005505	0.014522	0.006525	0.006334	0.0062285	0.118563	0.005554	0.005641	0.00513	0.006525	0.006334	0.00622817	0.118388	0.0054
NLD	10.1	Livestock, Cattle	336.384	338.721	335.371	334.745	338.974	346.481	358.254	0	0	0	0	0	0	0	0	0	0	0	0	0	0	58.2685	54.8277	55.4223	52.7427	56.408	53.0531	51.941	3.26196	3.16775	3.2173	3.14651	3.2964	3.36291	3.3924	0.298937	0.300025	0.299164	0.294244	0.294044	0.303944	0.308266	0.0824026	0.0826946	0.0824532	0.0810912	0.0810358
NLD	10.2	Livestock, Poultry	2.27073	2.78479	3.10751	3.08416	2.40924	2.49026	2.5153	0	0	0	0	0	0	0	0	0	0	0	0	0	0	19.5658	22.4677	20.7919	22.9473	19.7765	17.5623	16.8252	0	0	0	0	0	0	0	2.11803	2.76839	3.01693	2.97915	3.32483	3.43758	3.47223	0.182498	0.237094	0.252398	0.24556	0.26818
NLD	10.3	Livestock, Sheep	9.70016	10.1182	11.1447	11.2559	11.198	9.92373	9.10806	0	0	0	0	0	0	0	0	0	0	0	0	0	0	2.3066	1.73445	1.72531	1.76499	1.70016	1.64192	1.4657	0	0	0	0	0	0	0	0	0	0	0	0	0	0	0	0	0	0	0
NLD	10.4	Livestock, Goats	1.46369	1.50972	1.56228	1.65228	1.73089	1.89649	2.00665	0	0	0	0	0	0	0	0	0	0	0	0	0	0	0	0	0	0	0	0	0	0	0	0	0	0	0	0	0.00520971	0.00536254	0.00555241	0.00588267	0.00615627	0.00674268	0.0071095	0.00156291	0.00160876	0.00166572	0.0017648	0.00184688
NLD	10.5	Livestock, Pigs	66.8917	66.9233	67.876	67.6678	69.0297	71.2856	71.9169	0	0	0	0	0	0	0	0	0	0	0	0	0	0	29.2756	27.8044	28.4985	28.7976	29.9547	25.0606	25.8767	0	0	0	0	0	0	0	1.32125	1.32025	1.34105	1.33878	1.31565	1.35647	1.37139	0.0621627	0.0621237	0.0630561	0.0628055	0.0616111
NLD	10.6	Livestock, Other animals	2.63619	2.68506	2.78329	2.66499	2.78356	3.00432	3.02191	0	0	0	0	0	0	0	0	0	0	0	0	0	0	3.07003	3.11055	3.44627	3.07141	3.18566	3.02228	2.98081	0	0	0	0	0	0	0	0.051155	0.0514296	0.0519985	0.0513288	0.0520229	0.0532894	0.0533909	0.051155	0.0514296	0.0519985	0.0513288	0.0520229
NLD	10.7	Crops and pastures	0	0	0	0	0	0	0	0	0	0	0	0	0	0	0	0	0	0	0	0	0	14.7661	14.513	12.9993	14.9277	12.121	10.1256	10.1256	0	0	0	0	0	0	0	0	0	0	0	0	0	0	0	0	0	0	0
NLD	10.8	Agricultural waste burning	0	0	0	0	0	0	0	0	0	0	0	0	0	0	0	0	0	0	0	0	0	0	0	0	0	0	0	0	0	0	0	0	0	0	0	0	0	0	0	0	0	0	0	0	0	0	0
NLD	10.9	Rice cultivation	0	0	0	0	0	0	0	0	0	0	0	0	0	0	0	0	0	0	0	0	0	0	0	0	0	0	0	0	0	0	0	0	0	0	0	0	0	0	0	0	0	0	0	0	0	0	0
NLD	10.10	Storage and handling of agricultural products	0	0	0	0	0	0	0	0	0	0	0	0	0	0	0	0	0	0	0	0	0	0	0	0	0	0	0	0	0	0	0	0	0	0	0	0	0	0	0	0	0	0	0	0	0	0	0
NLD	10.11	Other agriculture	0	0	0	0	0	0	0	0	0	0	0	0	0	0	0.163385	0.163385	0.163385	0.163385	0.163385	0.163385	0.163385	0	0	0	0	0	0	0	0	0	0	0	0	0	0	0.76413	0.767419	0.767665	0.757303	0.758607	0.783485	0.768101	0.113182	0.113646	0.113612	0.112948	0.113232
NOR	1.1	Power plants	0.23306	0.23904	0.2428	0.25294	0.38574	0.3417	0.71096	2.33027	2.60561	2.71274	2.95155	3.42313	3.6647	4.60275	0.758312	0.783621	0.772508	0.799402	0.890952	0.922861	0.91805	0	0	0	0	0	0	0	1.76036	1.30011	1.208	1.20676	1.47111	1.64907	1.65833	0.210886	0.201718	0.196022	0.193227	0.214332	0.193266	0.262294	0.103219	0.0972187	0.0969796	0.0985668	0.114773
NOR	1.2	Refineries	0.03562	0.03136	0.03104	0.03897	0.03094	0.03836	0.03132	0.0002308	0.0003706	0.000768	0.000182	0.003196	0.003878	0.00137	8.76592	8.35449	7.22443	7.25697	7.2484	6.90073	6.29164	0	0	0	0	0	0	0	2.42538	2.16512	2.19784	2.32051	2.23593	1.9309	2.01201	0.171246	0.197118	0.179031	0.150669	0.150166	0.132774	0.167141	0.17094	0.196519	0.179031	0.150669	0.150165
NOR	2.1	Residential combustion (including commercial/institutional)	7.57518	7.07949	7.08209	7.09314	6.71569	6.64569	6.91957	177.067	160.453	151.426	146.197	136.304	131.807	134.589	9.97726	9.33625	9.33662	9.3577	8.86577	8.75917	9.12445	0.0899783	0.0844849	0.0850911	0.0851114	0.0806869	0.0800295	0.0833084	3.1165	2.70772	2.49724	2.57884	2.4017	2.29691	2.39566	43.208	38.7473	35.4513	33.7976	31.1474	29.7845	30.2573	43.1633	38.7118	35.4182	33.7586	31.1112
NOR	2.2	Agricultural stationary combustion	0.1615	0.16059	0.15925	0.15423	0.14936	0.14685	0.15849	0.131038	0.116263	0.10289	0.103267	0.0777264	0.0747945	0.0689535	0.0191973	0.0168081	0.0151149	0.0153268	0.0123226	0.0117273	0.0107418	0	0	0	0	0	0	0	0.098463	0.0972647	0.110722	0.114776	0.103189	0.102122	0.100193	0.013302	0.0129478	0.0130106	0.0165045	0.014446	0.0111747	0.00585186	0.00977793	0.00971811	0.010151	0.0124687	0.0109411
NOR	34.1	Iron and steel industry (including coke ovens)	3.66546	3.83491	3.81769	3.70554	3.69178	4.18402	4.01916	8.31156	8.5934	8.55133	8.89827	8.98841	9.39317	9.47506	3.0178	3.30755	3.34346	3.1811	3.4902	3.36716	3.07945	0	0	0	0	0	0	0	55.4427	58.474	60.5085	58.9414	58.8616	59.7009	55.6621	3.48905	4.58071	4.54385	3.43809	3.50395	3.44194	2.73206	3.36008	4.47016	4.421	3.30204	3.35982
NOR	34.2	Non-ferrous metal industry	0.00828	0.00686	0.00681	0.00707	0.00724	0.00707	0.00997	0.0461841	0.0286198	0.0185692	0.013734	0.0101486	0.013288	0.230453	0.00921924	0.00569734	0.0037141	0.0027468	0.0020669	0.00265938	0.0209026	0.0034	0.0038	0.0046	0.0051	0.0036	0.00103	0.00095	1.18524	1.26371	1.37915	1.41782	1.44329	1.40964	1.28216	2.18527	2.35802	2.55521	2.15995	2.3752	1.66528	1.12852	0.974353	1.05623	1.1427	0.967531	1.06166
NOR	34.3	Chemical industry	0.43866	0.39964	0.3968	0.41336	0.36271	0.35829	0.30644	22.4757	16.2955	17.6434	12.092	12.2287	14.3162	8.97106	1.08651	1.24183	1.07072	1.0869	0.880091	0.903008	1.28494	0.36662	0.41118	0.3985	0.48104	0.4253	0.42328	0.28658	2.68057	2.48596	2.52781	2.52666	2.13272	1.72111	1.62362	0.941545	0.867632	0.875251	0.71484	0.662654	0.683819	0.517683	0.810885	0.752285	0.745429	0.594382	0.551564
NOR	34.4	Paper and pulp industry	0.29644	0.28234	0.27267	0.28657	0.28353	0.323	0.23718	3.72417	3.35064	4.50061	3.81998	4.14	4.27046	3.34188	0.365689	0.33365	0.428505	0.374529	0.390855	0.399081	0.317968	0	0	0	0	0	0	0	1.79562	1.73301	1.67907	1.80075	1.60196	1.62426	1.33362	0.299469	0.350652	0.365877	0.339369	0.323194	0.313366	0.252934	0.222544	0.279788	0.274386	0.252461	0.243758
NOR	34.5	Cement industry	0	0	0	0	0	0	0	0	0	0	0	0	0	0	0	0	0	0	0	0	0	0	0	0	0	0	0	0	0	0	0	0	0	0	0	0.11424	0.07701	0.085	0.065535	0.0576725	0.061965	0.056865	0.04032	0.02718	0.03	0.02313	0.020355
NOR	34.6	Other non-metallic minerals industry	0	0	0	0	0	0	0	0	0	0	0	0	0	0	0	0	0	0	0	0	0	0	0	0	0	0	0	0	0	0	0	0	0	0	0	1.00573	1.01219	1.16964	1.07557	1.30805	1.28443	1.10202	0.334538	0.339525	0.395741	0.365361	0.441149
NOR	34.7	Storage and handling in industry	0	0	0	0	0	0	0	0	0	0	0	0	0	0	0	0	0	0	0	0	0	0.1485	0.1335	0.1353	0.1832	0.1814	0.1738	0.1464	0.0318	0.02995	0.0323	0.04403	0.04898	0.041996	0.03286	2.27011	2.2658	2.64066	2.85132	3.30734	2.3614	2.94931	0.111416	0.115571	0.104971	0.137325	0.127175
NOR	34.8	Other industries	0.12507	0.11998	0.13082	0.13764	0.14477	0.13956	0.13392	3.81873	3.87765	3.91305	3.94887	4.21941	3.59319	3.59003	1.37743	1.4348	1.59277	1.55167	1.50118	1.31144	1.41155	0	0	0	0	0	0	0	5.06551	3.68514	3.70873	3.71733	3.9688	4.0585	3.65505	0.172272	0.167578	0.149613	0.153845	0.146477	0.142914	0.130403	0.129325	0.130819	0.118088	0.124598	0.123032
NOR	5.1	Coal production	4.34093	2.77822	2.01263	1.95803	3.13551	2.15864	1.67872	0	0	0	0	0	0	0	0	0	0	0	0	0	0	0	0	0	0	0	0	0	0	0	0	0	0	0	0	0	0	0	0	0	0	0	0	0	0	0	0
NOR	5.2	Oil production	37.8604	39.4177	33.6071	30.2143	35.1572	30.9611	28.3964	0	0	0	0	0	0	0	162.761	131.724	91.8929	70.0812	64.5927	40.0831	34.6259	0	0	0	0	0	0	0	0	0	0	0	0	0	0	0	0	0	0	0	0	0	0	0	0	0	0
NOR	5.3	Gas production	7.20762	7.50047	6.45206	6.19604	7.60782	7.18182	7.06416	0	0	0	0	0	0	0	3.12	2.999	3.0556	2.8539	2.37272	2.4228	2.25	0	0	0	0	0	0	0	0	0	0	0	0	0	0	0	0	0	0	0	0	0	0	0	0	0	0
NOR	5.4	Gasoline distribution	0	0	0	0	0	0	0	0	0	0	0	0	0	0	6.23578	5.9566	6.04093	5.77997	5.57377	5.25827	4.81139	0	0	0	0	0	0	0	0	0	0	0	0	0	0	0	0	0	0	0	0	0	0	0	0	0	0
NOR	5.5	Flaring	0	0	0	0	0	0	0	0.807305	0.782327	0.799405	0.83891	1.67166	1.5387	0.896966	8.11362	9.33738	7.99278	7.21221	10.6573	8.26835	6.86379	0	0	0	0	0	0	0	0.834932	0.839932	0.939321	1.00196	1.48358	1.24143	0.974196	0.157747	0.0606335	0.0894238	0.188834	0.0906369	0.155968	0.139039	0.10437	0.0409444	0.0598486	0.124652	0.0610056
NOR	6.1	Solvent and other product use	0	0	0	0	0	0	0	0.627301	0.691916	0.346069	0.466161	0.477219	0.487223	0.495844	49.4772	50.5238	50.4215	47.0449	47.772	45.8189	38.3803	0	0	0	0	0	0	0	0.0179081	0.0197528	0.00987954	0.0133079	0.0136236	0.0139092	0.0141553	0.208634	0.230298	0.115285	0.154356	0.158344	0.160923	0.164914	0.206434	0.227698	0.113885	0.153406	0.157044
NOR	7.1	Road transport, light duty vehicles	0.959926	0.843236	0.714364	0.642784	0.587894	0.521279	0.46534	152.381	135.144	115.202	102.184	93.0308	81.5775	72.4565	19.7583	17.7738	15.3875	13.8799	12.8132	11.3781	10.2013	2.00956	1.9871	1.86883	1.81751	1.77178	1.64759	1.51902	23.8364	22.7354	21.1034	20.7195	21.1396	20.3209	19.4226	1.13696	1.13086	1.0999	1.11761	1.16274	1.09946	1.0186	1.08552	1.07937	1.04941	1.06591	1.10854
NOR	7.2	Road transport, heavy duty vehicles	0.283261	0.288667	0.286917	0.289821	0.298918	0.299474	0.303331	5.05142	5.28089	5.53332	5.77563	6.03277	5.76723	5.32451	1.49425	1.51039	1.54948	1.51533	1.43674	1.24988	1.05821	0.00823019	0.00857623	0.0088063	0.00907105	0.00943306	0.00912314	0.00856405	22.8548	23.4149	24.1816	24.3938	24.6384	23.05	20.5489	0.584599	0.574934	0.576485	0.561362	0.544578	0.479085	0.402835	0.555369	0.546188	0.54766	0.533294	0.51737
NOR	7.3	Road transport, mopeds and motorcycles	0.207283	0.196487	0.181519	0.157235	0.137418	0.115288	0.0960584	9.83552	9.53688	9.10848	8.73123	8.35371	7.93861	7.75846	2.02933	1.94799	1.86709	1.79501	1.74117	1.69473	1.67038	0.00157177	0.00159543	0.00162246	0.00166636	0.00172658	0.00177659	0.0018445	0.143389	0.144365	0.143621	0.143735	0.143183	0.141648	0.141879	0	0	0	0	0	0	0	0	0	0	0	0
NOR	7.4	Road transport, gasoline evaporation	0	0	0	0	0	0	0	0	0	0	0	0	0	0	3.01661	2.40699	1.85073	1.4496	1.18002	0.950058	0.805396	0	0	0	0	0	0	0	0	0	0	0	0	0	0	0	0	0	0	0	0	0	0	0	0	0	0
NOR	7.5	Road transport, wear	0	0	0	0	0	0	0	0	0	0	0	0	0	0	0	0	0	0	0	0	0	0	0	0	0	0	0	0	0	0	0	0	0	0	0	1.76108	1.73437	1.6918	1.77093	1.81249	1.92116	1.90076	0.507602	0.509534	0.503553	0.525941	0.548667
NOR	8.1	Air transport (<1000m)	0.03206	0.03091	0.02422	0.0269	0.02921	0.03039	0.03136	6.61757	7.27174	5.33852	5.26595	5.24214	5.4852	5.19343	1.51056	1.46119	1.18312	1.34141	1.36918	1.41681	1.37622	0	0	0	0	0	0	0	3.66442	3.73496	3.46754	3.82364	4.15777	4.28452	4.01012	0.00502706	0.0052134	0.00508783	0.0056683	0.0059128	0.00606326	0.00532523	0.00502706	0.0052134	0.00508783	0.0056683	0.0059128
NOR	8.2	Rail transport	0.00231	0.00251	0.00243	0.00236	0.00248	0.00258	0.00255	0.14091	0.153296	0.148302	0.144056	0.151351	0.157437	0.156094	0.05124	0.055744	0.053928	0.052384	0.0550368	0.0572497	0.0567614	0	0	0	0	0	0	0	0.60207	0.654992	0.633654	0.615512	0.646682	0.672684	0.666947	0.048678	0.0529568	0.0512316	0.0497648	0.052285	0.0543872	0.0539234	0.048678	0.0529568	0.0512316	0.0497648	0.052285
NOR	8.3	Navigation, non-international	0	0	0	0	0	0	0	9.10514	9.10657	8.59474	8.39692	8.20358	7.79876	8.38975	4.69523	4.78677	5.205	4.55844	4.4795	4.14174	4.23391	0.002	0.002	0.002	0.002	0.002	0.002	0.002	78.4904	78.8567	83.669	76.3889	74.184	66.0795	66.7557	2.34816	2.36317	2.422	2.37685	2.35817	2.20208	2.35299	2.25896	2.2734	2.33	2.28657	2.26866
NOR	8.4	Mobile machinery, agriculture	0	0	0	0	0	0	0	6.46118	6.59155	6.74557	6.63386	6.57056	6.51709	6.40513	1.27975	1.32175	1.37564	1.32922	1.27766	1.25823	1.2148	0.000656354	0.000684874	0.000717679	0.000701902	0.000708423	0.000700328	0.000681199	4.78174	4.77568	4.75967	4.37906	4.11429	3.79421	3.46286	0.862567	0.900156	0.943893	0.922065	0.931091	0.920431	0.893704	0.820305	0.856048	0.897641	0.876877	0.885419
NOR	8.5	Mobile machinery, industry	0	0	0	0	0	0	0	3.2776	3.58549	3.76172	3.71647	4.12269	4.34006	3.90661	0.917029	1.01719	1.06211	1.03633	1.13809	1.20431	1.05727	0.000982344	0.00109015	0.00113327	0.00111805	0.00122713	0.00130243	0.0011456	7.43	7.80939	7.73313	7.24107	7.39643	7.25022	6.05084	0.930779	1.02292	1.06872	1.05812	1.17069	1.23642	1.10889	0.884876	0.972441	1.016	1.00593	1.11299
NOR	8.6	Other mobile sources	0.00655	0.00852	0.00529	0.00619	0.00478	0.00961	0.01015	42.2228	43.4336	42.7641	43.3805	43.7832	42.7789	42.662	11.8753	12.1523	11.8468	12.1291	12.3616	12.0196	11.975	0.0010261	0.000960436	0.000623481	0.000902033	0.0012497	0.00106865	0.00149502	5.70509	6.55539	4.33905	6.21286	6.89591	5.76308	5.40884	0.725212	0.766953	0.577891	0.812902	0.982127	0.788517	0.747804	0.706509	0.746186	0.56658	0.789837	0.950593
NOR	9.1	Landfills	57.259	56.6507	52.8718	53.4155	52.0824	49.7381	50.7303	0	0	0	0	0	0	0	0	0	0	0	0	0	0	0	0	0	0	0	0	0	0	0	0	0	0	0	0	0	0	0	0	0	0	0	0	0	0	0	0
NOR	9.2	Controlled waste incineration	0.00433	0.0041	0.00352	0.00316	0.0037	0.004	0.00394	0.000849956	0.000824668	0.000762448	0.000323713	0.000381668	0.000414055	0.000407441	0.000100663	0.000100663	0.000100663	0	0	0	0	0	0	0	0	0	0	0	0.00210238	0.0019949	0.00173047	0.00137578	0.00162209	0.00175973	0.00173162	0.00204371	0.00195299	0.00172977	0.00116132	0.00136923	0.00148722	0.00146169	0.00204371	0.00195299	0.00172977	0.00116132	0.00136923
NOR	9.3	Other waste treatment	0.36135	0.43392	0.4455	0.46578	0.45602	0.46174	0.46761	0.00986223	0.00991809	0.0102121	0.0103686	0.0105766	0.0106215	0.010889	0.000854727	0.000859568	0.000885048	0.000898616	0.000916643	0.000920529	0.000943715	0.004	0.004	0.004	0.0011	0.0011	0.0024	0.0024	0.000591734	0.000595085	0.000612725	0.000622119	0.000634599	0.000637289	0.000653342	0.233308	0.192098	0.200925	0.200609	0.182121	0.181893	0.169064	0.218848	0.18895	0.199339	0.196951	0.178416
NOR	10.1	Livestock, Cattle	73.0973	72.6298	73.6221	70.6746	71.9974	70.8177	69.616	0	0	0	0	0	0	0	0	0	0	0	0	0	0	6.82446	6.72812	6.86746	6.52434	6.73918	6.60387	6.51647	0	0	0	0	0	0	0	0	0	0	0	0	0	0	0	0	0	0	0
NOR	10.2	Livestock, Poultry	6.02954	6.696	6.89022	6.98052	7.31557	7.78792	7.3914	0	0	0	0	0	0	0	0	0	0	0	0	0	0	1.80157	1.98016	1.99344	2.03389	2.21699	2.4355	2.47523	0	0	0	0	0	0	0	0	0	0	0	0	0	0	0	0	0	0	0
NOR	10.3	Livestock, Sheep	25.8708	23.4635	22.8908	21.8749	22.041	22.3858	23.13	0	0	0	0	0	0	0	0	0	0	0	0	0	0	4.27715	3.84325	3.7563	3.58073	3.59019	3.63006	3.70382	0	0	0	0	0	0	0	0	0	0	0	0	0	0	0	0	0	0	0
NOR	10.4	Livestock, Goats	0.38993	0.38324	0.39961	0.38344	0.38652	0.3784	0.37174	0	0	0	0	0	0	0	0	0	0	0	0	0	0	0.171014	0.164831	0.183661	0.16807	0.17926	0.188498	0.177073	0	0	0	0	0	0	0	0	0	0	0	0	0	0	0	0	0	0	0
NOR	10.5	Livestock, Pigs	2.18673	2.33269	2.35636	2.37239	2.3536	2.41249	2.45252	0	0	0	0	0	0	0	0	0	0	0	0	0	0	3.46238	3.68918	3.73071	3.74277	3.7072	3.79273	3.85551	0	0	0	0	0	0	0	0	0	0	0	0	0	0	0	0	0	0	0
NOR	10.6	Livestock, Other animals	1.75997	1.81821	1.93612	1.96767	2.14943	2.23524	2.30204	0	0	0	0	0	0	0	0	0	0	0	0	0	0	0.783988	0.814331	0.859159	0.888995	0.924136	0.916331	0.88889	0	0	0	0	0	0	0	0	0	0	0	0	0	0	0	0	0	0	0
NOR	10.7	Crops and pastures	0	0	0	0	0	0	0	0	0	0	0	0	0	0	0	0	0	0	0	0	0	2.25091	2.34524	2.2993	2.17043	2.31349	2.21618	2.74968	0	0	0	0	0	0	0	0	0	0	0	0	0	0	0	0	0	0	0
NOR	10.8	Agricultural waste burning	0.448	0.448	0.448	0.448	0.448	0.448	0.448	0.00407662	0.00450619	0.0042	0.00383385	0.00398345	0.00398345	0.00411889	0.5812	0.5806	0.58	0.5806	0.5812	0.5818	0.5824	0.09	0.09	0.09	0.09	0.09	0.09	0.09	0.0916	0.0908	0.09	0.0908	0.0916	0.0924	0.0932	0.48919	0.48919	0.48919	0.48919	0.48919	0.48919	0.48919	0.43407	0.43407	0.43407	0.43407	0.43407
NOR	10.9	Rice cultivation	0	0	0	0	0	0	0	0	0	0	0	0	0	0	0	0	0	0	0	0	0	0	0	0	0	0	0	0	0	0	0	0	0	0	0	0	0	0	0	0	0	0	0	0	0	0	0
NOR	10.10	Storage and handling of agricultural products	0	0	0	0	0	0	0	0	0	0	0	0	0	0	0	0	0	0	0	0	0	0	0	0	0	0	0	0	0	0	0	0	0	0	0	0	0	0	0	0	0	0	0	0	0	0	0
NOR	10.11	Other agriculture	0	0	0	0	0	0	0	0	0	0	0	0	0	0	0	0	0	0	0	0	0	0.728	0.82355	0.83655	0.91325	0.66885	0.6422	0.4069	0	0	0	0	0	0	0	0.000953906	0.000958548	0.000949613	0.000929086	0.000911536	0.000894746	0.000890045	0.000953906	0.000958548	0.000949613	0.000929086	0.000911536
PRT	1.1	Power plants	0.21513	0.25246	0.29272	0.2794	0.25142	0.27212	0.30522	2.60389	2.61016	3.02443	2.54771	2.22521	2.54856	3.65588	0.654594	0.77801	0.911366	0.80534	0.761654	0.936642	1.21241	0.00363003	0.0035498	0.00362378	0.00357329	0.0034018	0.00358516	0.00369849	46.6356	45.6947	55.7618	45.7851	38.4972	35.0584	36.8875	2.23695	1.9919	2.12915	2.02679	1.70315	1.57849	1.78641	1.07159	0.960471	1.02871	0.982274	0.843132
PRT	1.2	Refineries	0.09906	0.10038	0.09974	0.09946	0.09476	0.10904	0.07825	1.28621	1.30717	1.26288	1.25197	1.22646	1.22776	1.07253	12.6377	12.7859	13.0436	13.2889	12.6472	12.3694	10.6096	0	0	0	0	0	0	0	6.84607	6.96122	6.86854	6.85205	6.56328	7.46516	5.58719	2.17888	2.07397	1.77177	1.84701	1.80881	1.7757	1.31135	1.72779	1.66385	1.44739	1.49354	1.46865
PRT	2.1	Residential combustion (including commercial/institutional)	14.8751	14.996	15.0602	14.9364	14.9293	14.8796	14.8767	240.42	241.999	242.94	241.369	240.969	240.163	239.909	20.4043	20.6987	20.7246	19.9187	19.9223	19.5141	19.4994	0	0	0	0	0	0	0	25.6339	27.5787	26.7256	17.9921	17.9514	12.9092	12.6849	20.6262	20.937	21.0103	20.1919	20.2105	19.7632	19.7308	20.4399	20.7316	20.8031	20.0395	20.0545
PRT	2.2	Agricultural stationary combustion	0.09027	0.08918	0.07535	0.07409	0.06896	0.09713	0.09262	0.0717787	0.0660434	0.0604953	0.0513584	0.0411167	0.0392492	0.0333908	0.0738817	0.0674816	0.0493144	0.0443862	0.0363996	0.027633	0.0297273	0	0	0	0	0	0	0	0.9937	0.8799	0.66585	0.57782	0.453999	0.324313	0.329748	0.0851753	0.0691455	0.0613901	0.0532017	0.0365092	0.0332195	0.030137	0.0601285	0.0515654	0.0419969	0.0385977	0.0288604
PRT	34.1	Iron and steel industry (including coke ovens)	0.00585	0.00573	0.00622	0.00738	0.00754	0.00543	0.00453	5.97068	6.05196	6.13867	6.3911	6.67657	6.90438	6.08093	0.092944	0.0948421	0.0986299	0.107042	0.16559	0.168318	0.123659	0	0	0	0	0	0	0	0.577195	0.579259	0.610475	0.693557	0.729811	0.629617	0.51866	4.86419	4.86558	4.86911	4.89452	4.87771	4.83805	4.82599	3.61138	3.61261	3.61529	3.63273	3.62412
PRT	34.2	Non-ferrous metal industry	0	0	0	0	0	0	0	0	0	0	0	0	0	0	0	0	0	0	0	0	0	0	0	0	0	0	0	0	0	0	0	0	0	0	0	0	0	0	0	0	0	0	0	0	0	0	0
PRT	34.3	Chemical industry	0.61143	0.62855	0.63066	0.60384	0.59535	0.68195	0.52354	44.0174	45.9319	45.9259	42.967	41.0528	53.4601	35.7658	12.6658	12.8636	12.7541	12.2632	12.8582	13.3865	11.3377	1.90748	2.46222	2.24077	1.93938	2.23669	1.67456	1.14716	3.87734	4.07266	3.9957	3.79707	4.07518	3.75999	2.49637	4.08943	5.15715	4.57523	3.89063	3.99163	3.48749	2.5389	3.91557	4.9813	4.40238	3.75664	3.84798
PRT	34.4	Paper and pulp industry	1.21065	1.30621	1.33391	1.39266	1.45312	1.39317	1.48565	3.59667	4.62201	4.45367	4.76002	5.25175	4.88	4.80481	6.68303	7.37375	7.45047	7.73957	7.72637	7.43194	7.94866	0	0	0	0	0	0	0	23.3787	24.7419	25.2066	26.073	26.5017	25.6417	27.6815	25.2641	26.5283	26.8244	27.8177	28.0602	27.2439	29.0396	21.3477	22.4322	22.6877	23.514	23.7344
PRT	34.5	Cement industry	0	0	0	0	0	0	0	0	0	0	0	0	0	0	0	0	0	0	0	0	0	0	0	0	0	0	0	0	0	0	0	0	0	0	0	0	0	0	0	0	0	0	0	0	0	0	0
PRT	34.6	Other non-metallic minerals industry	0	0	0	0	0	0	0	0.103975	0.106105	0.111665	0.116866	0.109722	0.126151	0.107501	3.4739	2.91743	2.14038	1.38401	1.24925	1.27949	1.36091	0	0	0	0	0	0	0	0.0542476	0.0553591	0.0582598	0.0609736	0.0572464	0.0658181	0.0560876	19.9827	24.4727	28.5816	22.9453	20.7154	21.2313	22.5545	3.16839	3.87919	4.52985	3.63798	3.28466
PRT	34.7	Storage and handling in industry	0	0	0	0	0	0	0	0	0	0	0	0	0	0	0	0	0	0	0	0	0	0	0	0	0	0	0	0	0.0501049	0.0541117	0.0788984	0.0880873	0.0627794	0.0656677	0.0547658	0	0	0	0	0	0	0	0	0	0	0	0
PRT	34.8	Other industries	1.21148	1.2155	1.18953	1.16221	1.21367	1.18116	1.10416	20.8453	22.013	22.3369	22.1197	22.8187	22.6095	20.5235	21.3322	21.9522	21.296	21.0553	21.4147	21.1161	20.4506	0.724021	0.71515	0.740869	0.754433	0.772028	0.724674	0.531167	38.9696	41.2529	40.0586	36.985	37.0359	34.9526	30.9362	11.2819	12.2712	12.2246	10.6781	11.2504	11.0922	9.84136	10.6995	11.7378	11.6939	10.1571	10.7395
PRT	5.1	Coal production	0	0	0	0	0	0	0	0	0	0	0	0	0	0	0	0	0	0	0	0	0	0	0	0	0	0	0	0	0	0	0	0	0	0	0	0	0	0	0	0	0	0	0	0	0	0	0
PRT	5.2	Oil production	0	0	0	0	0	0	0	0	0	0	0	0	0	0	1.78621	1.89349	2.01637	2.20605	2.16252	2.11062	1.77292	0	0	0	0	0	0	0	0	0	0	0	0	0	0	0	0	0	0	0	0	0	0	0	0	0	0
PRT	5.3	Gas production	33.5831	20.658	8.3815	8.38294	9.9243	22.3332	31.3252	0	0	0	0	0	0	0	0	0	0	0	0	0	0	0	0	0	0	0	0	0	0	0	0	0	0	0	0	0	0	0	0	0	0	0	0	0	0	0	0
PRT	5.4	Gasoline distribution	0	0	0	0	0	0	0	0	0	0	0	0	0	0	4.43469	4.59851	4.51266	4.93716	4.83974	4.72359	3.96781	0	0	0	0	0	0	0	0	0	0	0	0	0	0	0	0	0	0	0	0	0	0	0	0	0	0
PRT	5.5	Flaring	0	0	0	0	0	0	0	0.112097	0.129641	0.154871	0.186491	0.187374	0.170501	0.140741	0.0190868	0.0220741	0.0263699	0.0317538	0.0319042	0.0290312	0.023964	0	0	0	0	0	0	0	0.0206017	0.023826	0.0284627	0.034274	0.0344363	0.0313353	0.0258659	0	0	0	0	0	0	0	0	0	0	0	0
PRT	6.1	Solvent and other product use	0	0	0	0	0	0	0	0	0	0	0	0	0	0	76.9555	75.0561	72.8367	73.7667	73.2305	69.6428	64.3524	0	0	0	0	0	0	0	0	0	0	0	0	0	0	0.0190917	0.0187394	0.0176764	0.0177863	0.0186804	0.0205567	0.0163996	0.0190917	0.0187394	0.0176764	0.0177863	0.0186804
PRT	7.1	Road transport, light duty vehicles	1.54644	1.4174	1.30322	1.18214	1.06165	0.951957	0.878822	143.246	132.736	119.45	104.658	93.8897	80.9205	72.9781	21.8741	19.9462	18.387	16.0193	14.0122	11.9238	10.5328	1.30342	1.26431	1.64787	1.52793	1.44822	1.32788	1.26951	38.8548	38.6196	37.3515	37.2553	35.3436	32.9798	32.1631	3.13884	3.09973	2.8589	2.94434	2.8247	2.6673	2.63841	2.6449	2.60244	2.36621	2.44069	2.33203
PRT	7.2	Road transport, heavy duty vehicles	0.35657	0.373604	0.398945	0.361636	0.324523	0.290726	0.268099	17.7895	17.4224	17.4382	17.1564	16.5375	16.3967	16.2549	5.35805	5.18319	5.13686	4.97502	4.66707	4.37084	4.16849	0.0204712	0.0204923	0.0205123	0.0208271	0.0211271	0.0212994	0.0218162	78.0995	76.596	74.6247	73.6789	71.7072	67.6265	65.9444	3.14192	3.05128	2.84996	2.77646	2.65118	2.54919	2.47863	2.86172	2.77186	2.56975	2.49239	2.36298
PRT	7.3	Road transport, mopeds and motorcycles	0.365059	0.348494	0.336887	0.316043	0.294717	0.275717	0.267109	32.9323	31.1308	29.6717	26.8342	24.3358	21.4899	19.5796	14.6212	12.8911	11.5426	9.83585	8.43837	6.95327	6.0646	0.00280637	0.00291294	0.00318471	0.00325419	0.00335754	0.0033776	0.00355739	0.355883	0.404673	0.44956	0.478902	0.504229	0.506189	0.520963	0.251684	0.229406	0.221721	0.193778	0.17064	0.144163	0.12861	0.240482	0.218036	0.209532	0.181578	0.158294
PRT	7.4	Road transport, gasoline evaporation	0	0	0	0	0	0	0	0	0	0	0	0	0	0	0	0	0	0	0	0	0	0	0	0	0	0	0	0	0	0	0	0	0	0	0	0	0	0	0	0	0	0	0	0	0	0	0
PRT	7.5	Road transport, wear	0	0	0	0	0	0	0	0	0	0	0	0	0	0	0	0	0	0	0	0	0	0	0	0	0	0	0	0	0	0	0	0	0	0	0	0	0	0	0	0	0	0	0	0	0	0	0
PRT	8.1	Air transport (<1000m)	0.0326	0.02721	0.02681	0.02464	0.01831	0.016	0.01498	2.83927	2.82547	2.82848	2.8781	2.95492	2.90896	2.72345	0.578741	0.469523	0.425382	0.401911	0.405744	0.389203	0.364382	0	0	0	0	0	0	0	3.261	3.34819	3.40303	3.51028	3.63621	3.4682	3.24702	0.854784	0.912473	0.921642	0.97169	1.03456	0.999804	0.936043	0.854784	0.912473	0.921642	0.97169	1.03456
PRT	8.2	Rail transport	0.00653	0.00592	0.00551	0.00515	0.00526	0.00556	0.00389	0.595689	0.539666	0.50221	0.469064	0.479935	0.50661	0.355061	0.154241	0.139735	0.130036	0.121454	0.124269	0.131176	0.0919355	0.000212746	0.000192738	0.000179361	0.000167523	0.000171405	0.000180932	0.000126808	1.69083	1.53181	1.42549	1.33141	1.36226	1.43798	1.00782	0.115187	0.104354	0.0971109	0.0907017	0.0928037	0.0979619	0.0686573	0.115187	0.104354	0.0971109	0.0907017	0.0928037
PRT	8.3	Navigation, non-international	0	0	0	0	0	0	0	0.017703	0.0180692	0.0180225	0.0180313	0.0180401	0.0184036	0.0180298	0.0335856	0.0423683	0.056	0.0525545	0.0496439	0.0480796	0.0449275	0	0	0	0	0	0	0	3.68985	3.91832	4.072	4.03858	4.00557	4.05105	3.93467	0.141436	0.152005	0.16	0.158347	0.156729	0.158195	0.153358	0.13348	0.143455	0.151	0.14944	0.147913
PRT	8.4	Mobile machinery, agriculture	0	0	0	0	0	0	0	4.15721	3.96118	3.45884	3.33962	3.27228	5.10551	4.78627	1.70364	1.6233	1.41744	1.36859	1.34099	2.09225	1.96143	0.00145143	0.00138299	0.00120761	0.00116598	0.00114247	0.00178252	0.00167106	11.2196	10.6905	9.33483	9.01307	8.83132	13.7789	12.9173	1.2058	1.14894	1.00324	0.968661	0.949128	1.48086	1.38826	1.20548	1.14864	1.00298	0.968405	0.948877
PRT	8.5	Mobile machinery, industry	0	0	0	0	0	0	0	0	0	0	0	0	0	0	0	0	0	0	0	0	0	0	0	0	0	0	0	0	0	0	0	0	0	0	0	0	0	0	0	0	0	0	0	0	0	0	0
PRT	8.6	Other mobile sources	0.00037	0.00028	0.00051	0.00053	0.00051	0.0006	0.0006	0.0452375	0.0491929	0.0630734	0.0965726	0.0621162	0.0597432	0.0539113	0.0366059	0.0471445	0.049263	0.0907811	0.0480123	0.0397014	0.0382018	0	0	0	0	0	0	0	0.342113	0.480321	0.450826	0.916858	0.436559	0.324299	0.327705	0.00278142	0.0038103	0.00205321	0.00492037	0.00196201	0.00113755	0.00130145	0.00247424	0.00327142	0.00156846	0.00375818	0.00149826
PRT	9.1	Landfills	224.409	222.11	220.797	225.368	223.135	239.424	252.073	0	0	0	0	0	0	0	3.6004	3.53603	3.54353	3.59	3.62575	4.14459	4.46044	1.82571	1.79818	1.78855	1.82218	1.8089	1.98597	2.11135	0	0	0	0	0	0	0	0	0	0	0	0	0	0	0	0	0	0	0
PRT	9.2	Controlled waste incineration	0.00253	0.0025	0.00247	0.00244	0.00244	0.00244	0.00244	1.89445	3.97677	6.05917	8.14157	10.2247	15.4573	12.4226	0.676927	1.42051	2.16411	2.90771	3.65169	5.52042	4.43657	1.00776e-05	7.65472e-06	5.23184e-06	2.80896e-06	2.80896e-06	2.80896e-06	2.80896e-06	0.140079	0.288162	0.436694	0.585224	0.733847	1.10893	0.892858	0.361647	0.758069	1.15458	1.55096	1.94775	2.94439	2.36632	0.00101479	0.000770812	3.28511e-05	1.76376e-05	1.76376e-05
PRT	9.3	Other waste treatment	115.843	119.788	124.552	125.556	110.814	99.3664	89.2449	0.000407913	0.000461352	0.00054285	0.000593046	0.000713742	0.000929049	0.00110558	0.427535	0.437505	0.436962	0.428771	0.442755	0.422666	0.404613	0.652189	0.382266	0.113075	0.11324	0.114786	0.116239	0.110129	0.000893937	0.00101105	0.00118965	0.00129965	0.00156416	0.002036	0.00242287	0	0	0	0	0	0	0	0	0	0	0	0
PRT	10.1	Livestock, Cattle	101.313	103.878	105.894	104.337	103.336	105.572	103.37	0	0	0	0	0	0	0	0	0	0	0	0	0	0	11.3958	11.4798	11.7895	11.8036	11.6633	11.744	11.8377	0	0	0	0	0	0	0	0	0	0	0	0	0	0	0	0	0	0	0
PRT	10.2	Livestock, Poultry	1.96647	1.85798	1.73582	1.62276	1.52365	1.45618	1.41391	0	0	0	0	0	0	0	0	0	0	0	0	0	0	5.01359	4.75791	4.48003	4.23564	4.0344	3.9237	3.86796	0	0	0	0	0	0	0	0	0	0	0	0	0	0	0	0	0	0	0
PRT	10.3	Livestock, Sheep	35.215	38.0823	37.6771	39.3569	37.9278	34.913	32.815	0	0	0	0	0	0	0	0	0	0	0	0	0	0	1.40287	1.4282	1.47072	1.49606	1.4698	1.40876	1.31939	0	0	0	0	0	0	0	0	0	0	0	0	0	0	0	0	0	0	0
PRT	10.4	Livestock, Goats	4.30599	4.31674	4.24056	4.70963	4.49942	4.66459	4.35779	0	0	0	0	0	0	0	0	0	0	0	0	0	0	0.17857	0.173781	0.172966	0.173223	0.169986	0.166627	0.162844	0	0	0	0	0	0	0	0	0	0	0	0	0	0	0	0	0	0	0
PRT	10.5	Livestock, Pigs	52.6243	52.5183	52.5211	52.9973	53.1093	53.2594	53.4004	0	0	0	0	0	0	0	0	0	0	0	0	0	0	5.60703	5.57058	5.54206	5.5623	5.53648	5.51885	5.4934	0	0	0	0	0	0	0	0	0	0	0	0	0	0	0	0	0	0	0
PRT	10.6	Livestock, Other animals	1.70215	1.58846	1.46419	1.35413	1.27829	1.22583	1.17333	0	0	0	0	0	0	0	0	0	0	0	0	0	0	1.19322	1.13634	1.064	0.991021	0.935175	0.903137	0.880442	0	0	0	0	0	0	0	0	0	0	0	0	0	0	0	0	0	0	0
PRT	10.7	Crops and pastures	0	0	0	0	0	0	0	0	0	0	0	0	0	0	0	0	0	0	0	0	0	21.8402	22.6693	20.6806	19.589	20.7624	19.6393	19.5748	0	0	0	0	0	0	0	0	0	0	0	0	0	0	0	0	0	0	0
PRT	10.8	Agricultural waste burning	5.607	5.607	5.607	5.607	5.607	5.607	5.607	0.0690488	0.0805779	0.0516	0.0678633	0.0609079	0.0609079	0.0510738	7.2932	7.2916	7.29	7.2916	7.2932	7.2948	7.2964	1.1204	1.1202	1.12	1.1202	1.1204	1.1206	1.1208	1.1808	1.1804	1.18	1.1804	1.1808	1.1812	1.1816	6.12446	6.12446	6.12446	6.12446	6.12446	6.12446	6.12446	5.43438	5.43438	5.43438	5.43438	5.43438
PRT	10.9	Rice cultivation	16.2853	16.9599	14.7536	17.2686	18.6085	18.3105	19.5685	0	0	0	0	0	0	0	0	0	0	0	0	0	0	0	0	0	0	0	0	0	0	0	0	0	0	0	0	0	0	0	0	0	0	0	0	0	0	0	0
PRT	10.10	Storage and handling of agricultural products	0	0	0	0	0	0	0	0	0	0	0	0	0	0	0	0	0	0	0	0	0	0	0	0	0	0	0	0	0	0	0	0	0	0	0	0	0	0	0	0	0	0	0	0	0	0	0
PRT	10.11	Other agriculture	0	0	0	0	0	0	0	0	0	0	0	0	0	0	0	0	0	0	0	0	0	0	0	0	0	0	0	0	0	0	0	0	0	0	0	0	0	0	0	0	0	0	0	0	0	0	0
SWE	1.1	Power plants	2.99098	3.06053	3.36778	3.49339	3.51271	3.89956	4.18743	28.2674	29.0389	32.0561	32.7875	33.0549	36.994	39.3351	2.71656	2.79572	2.88632	2.91109	2.9719	3.27199	3.48578	0.519779	0.519747	0.554097	0.561719	0.567581	0.616356	0.662413	13.158	12.1354	12.3276	12.6886	12.5489	12.9397	14.6381	3.90129	3.93164	4.14441	4.26947	4.20833	4.58227	4.92873	3.00567	3.02971	3.17301	3.25834	3.20856
SWE	1.2	Refineries	0.03675	0.03897	0.03939	0.03821	0.03368	0.03872	0.03877	0.373686	0.397272	0.398028	0.389787	0.341182	0.399088	0.394969	11.6902	9.04788	7.78306	8.35742	8.95588	8.66704	8.87222	0.0689492	0.0705864	0.0739322	0.0717225	0.0639182	0.0753953	0.0765975	1.62624	1.56954	1.54762	1.20828	1.07477	1.24369	1.27942	0.206731	0.224883	0.232276	0.225551	0.196174	0.233369	0.228771	0.190261	0.204738	0.214781	0.209233	0.183202
SWE	2.1	Residential combustion (including commercial/institutional)	10.8928	10.9838	11.2692	10.6609	10.5028	10.7102	11.2822	145.456	134.96	137.176	122.238	129.358	133.702	140.869	10.8315	9.8608	10.0582	8.7838	9.46718	9.80787	10.3316	0.191566	0.184686	0.175957	0.158949	0.164262	0.159687	0.166071	6.32578	6.01752	5.40764	4.78084	4.81373	4.57931	4.71293	5.79814	5.41262	5.52367	4.94974	5.25977	5.39521	5.68415	5.79581	5.41136	5.5235	4.94925	5.25955
SWE	2.2	Agricultural stationary combustion	0.72003	0.734	1.08975	1.11889	1.41839	1.6324	1.71084	8.25335	8.42289	14.0699	14.5124	19.2882	22.6905	23.9231	0.636541	0.649528	1.07205	1.10564	1.46011	1.7152	1.80765	0.0125787	0.0127717	0.0167323	0.0171496	0.0192788	0.0215302	0.0226091	0.510703	0.517465	0.616338	0.629949	0.643367	0.698742	0.742476	0.326014	0.332507	0.543668	0.560616	0.735135	0.862701	0.911609	0.32436	0.330853	0.542034	0.558952	0.734047
SWE	34.1	Iron and steel industry (including coke ovens)	0.06385	0.0666	0.05341	0.04731	0.04513	0.03637	0.02576	2.7735	2.84918	2.74967	2.86496	2.89915	2.65186	1.52001	0.169589	0.172769	0.156292	0.160782	0.14713	0.145458	0.104259	0.0152472	0.0150209	0.0138617	0.014358	0.0143916	0.0131758	0.00952193	2.75114	2.95091	2.99584	2.97175	2.93559	2.79425	1.85428	2.11241	1.99517	3.08656	3.08176	2.67089	2.74192	1.83135	1.78182	1.64808	2.7343	2.7266	2.36911
SWE	34.2	Non-ferrous metal industry	0.00141	0.00135	0.00133	0.00138	0.00134	0.00144	0.0014	6.83378	7.06914	7.19242	7.1346	8.60649	5.73387	4.89781	0.0134723	0.0109568	0.0177273	0.0339833	0.0225443	0.0195467	0.00175855	0.00111882	0.00114264	0.00109438	0.00117327	0.00116583	0.0013245	0.0012539	0.331913	0.302749	0.407111	0.338138	0.386036	0.375408	0.511412	0.311933	0.308013	0.326016	0.523367	0.44862	0.38266	0.134874	0.158608	0.155277	0.16147	0.251826	0.223138
SWE	34.3	Chemical industry	0.5267	0.53497	0.48131	0.51313	0.48278	0.48118	0.32732	0.868115	0.954965	0.829446	1.18808	0.712526	0.744374	0.884781	3.74855	3.95617	3.62079	3.5023	3.62713	2.43985	2.47028	0.111243	0.14494	0.127502	0.122527	0.0780528	0.064406	0.0533534	2.22586	2.311	2.06557	2.17823	2.13764	2.03585	1.76759	0.388183	0.536642	0.391843	0.275729	0.3073	0.253584	0.172521	0.347464	0.478846	0.351537	0.247704	0.27447
SWE	34.4	Paper and pulp industry	1.21469	1.23946	1.27489	1.34637	1.35028	1.41474	1.43003	26.8775	26.846	27.2177	28.0701	28.0914	28.3199	27.9873	7.97695	7.82071	7.8347	7.97642	7.9962	7.76655	7.57699	2.48852	2.46147	2.46504	2.48384	2.47534	2.42474	2.33299	14.5722	14.7167	14.7298	15.3307	15.0282	14.8842	14.3387	5.73523	6.86023	5.91428	5.70231	5.44975	4.44154	4.58224	4.55786	5.44643	4.69756	4.52936	4.33254
SWE	34.5	Cement industry	0	0	0	0	0	0	0	0	0	0	0	0	0	0	0	0	0	0	0	0	0	0	0	0	0	0	0	0	1.389	1.947	1.788	1.9433	1.5969	1.59908	1.45621	0.25452	0.30033	0.31428	0.260091	0.275981	0.243125	0.203976	0.22624	0.26696	0.27936	0.231192	0.245317
SWE	34.6	Other non-metallic minerals industry	0	0	0	0	0	0	0	0	0	0	0	0	0	0	0.70408	1.0337	1.36972	0.882676	1.0779	0.993586	0.444084	0	0	0	0	0	0	0	0.0322695	0.0264295	0.0216003	0.02415	0.0583914	0.068342	0.0864902	1.19301	1.16256	1.32184	1.41787	1.40679	1.18743	0.776203	0.242274	0.219129	0.244562	0.24176	0.282627
SWE	34.7	Storage and handling in industry	0	0	0	0	0	0	0	0	0	0	0	0	0	0	0.0473	0.04223	0.04689	0.04794	0.049822	0.05583	0.02952	0.3179	0.2499	0.249	0.2515	0.223	0.1852	0.1286	0.4858	0.473	0.4815	0.48	0.4875	0.49156	0.481603	0.154809	0.15669	0.142842	0.150237	0.144539	0.108824	0.100548	0.126918	0.12865	0.11753	0.120684	0.115759
SWE	34.8	Other industries	0.81813	0.78541	0.71317	0.9105	0.80587	0.74828	0.72195	7.4386	7.16865	6.35556	8.39916	7.31239	6.5265	6.21253	4.25395	4.63488	4.3645	4.68821	4.42482	4.69624	4.9065	0.130098	0.126159	0.11608	0.139289	0.125302	0.11239	0.10385	7.13988	6.82921	6.4922	7.24418	7.03107	6.49654	5.47531	0.996951	0.950591	0.863311	1.09092	0.963071	0.82893	0.769106	0.779569	0.744688	0.672978	0.857366	0.749749
SWE	5.1	Coal production	0.00011	0.00016	0.00012	0.00011	0.0001	0.0001	0.00031	0.001078	0.001576	0.00115	0.001126	0.000992	0.000964	0.003138	0.0002156	0.0003152	0.00023	0.0002252	0.0001984	0.0001928	0.0006276	0	0	0	0	0	0	0	0.00372122	0.00501184	0.003456	0.006804	0.002976	0.002892	0.0123014	0.292257	0.26968	0.265145	0.315547	0.269189	0.277179	0.23216	0.0722893	0.0576611	0.0533713	0.0945334	0.0542412
SWE	5.2	Oil production	0	0	0	0	0	0	0	0	0	0.000155896	0.0493557	0.0570699	0.0614933	0.0560572	0	0	1.03931e-05	0.00493492	0.00549714	0.00601744	0.00540139	0	0	1.03931e-05	0.00493492	0.00549714	0.00601744	0.00540139	0	0	0.000727514	0.296108	0.334025	0.363684	0.32817	0	0	1.03931e-06	0.043416	0.0447235	0.0506587	0.0439768	0	0	1.03931e-06	0.043416	0.0447235
SWE	5.3	Gas production	0.02605	0.02609	0.02613	0.02617	0.02617	0.0262	0.02623	21.0742	21.0783	21.0805	21.0825	21.0803	21.082	21.0846	0.83819	0.840379	0.842083	0.843874	0.843522	0.845151	0.846409	0.00159166	0.00159328	0.00159488	0.00159647	0.00159647	0.001598	0.00159891	1.2171	1.22525	1.23405	1.24204	1.24177	1.24979	1.25449	0.120126	0.120801	0.121912	0.122542	0.122393	0.123213	0.123694	0.113803	0.114443	0.115496	0.116092	0.115951
SWE	5.4	Gasoline distribution	0	0	0	0	0	0	0	0.000448732	0.000377377	0.000427627	0.000371599	0.000425963	0.00035783	0.000319917	5.46734	5.47457	5.46983	5.52744	5.45672	5.59193	5.35958	5.9831e-05	5.0317e-05	5.7017e-05	4.95465e-05	5.67951e-05	4.77106e-05	4.26556e-05	0.00209408	0.0017611	0.0019956	0.00173413	0.00198783	0.00166987	0.00149295	2.99155e-06	2.51585e-06	2.85085e-06	2.47733e-06	2.83976e-06	2.38553e-06	2.13278e-06	2.99155e-06	2.51585e-06	2.85085e-06	2.47733e-06	2.83976e-06
SWE	5.5	Flaring	0	0	0	0	0	0	0	0.0166402	0.0166597	0.0195418	0.0331243	0.0250626	0.0132635	0.0180295	0.00254791	0.00184798	0.00246929	0.00476878	0.00323673	0.00169924	0.00214695	0.00254791	0.00184798	0.00246929	0.00476878	0.00323673	0.00169924	0.00214695	0.0637742	0.0581474	0.0692559	0.104047	0.0796615	0.0472511	0.0614473	0.00543356	0.00283913	0.00444628	0.00969461	0.00596082	0.0031039	0.00361657	0.00543356	0.00283913	0.00444628	0.00969461	0.00596082
SWE	6.1	Solvent and other product use	0	0	0	0	0	0	0	0	0	0	0	0	0	0	67.6581	71.9613	73.1572	75.6504	77.3492	79.7127	79.7127	0	0	0	0	0	0	0	0	0	0	0	0	0	0	0.672941	0.694034	0.645137	0.631325	0.721114	0.506084	0.468903	0.672941	0.694034	0.645137	0.631325	0.721114
SWE	7.1	Road transport, light duty vehicles	1.55207	1.37988	1.28064	1.16037	1.0605	0.957036	0.914376	242.65	220.496	207.245	185.063	165.558	149.017	145.978	41.1218	38.2581	35.5962	31.6794	29.3755	26.4484	26.0013	1.35698	1.38149	1.38561	1.35567	1.33098	1.28326	1.31295	46.9061	41.3108	38.0761	34.0217	31.3452	28.2734	28.11	1.22254	1.17975	0.977262	0.925237	0.884026	0.757408	0.704677	1.16141	1.12076	0.928399	0.878976	0.839824
SWE	7.2	Road transport, heavy duty vehicles	0.20533	0.193477	0.192578	0.166884	0.144572	0.122188	0.107509	9.69419	9.72026	9.8043	9.81211	9.66571	8.14852	6.88781	2.18276	2.08637	2.01867	1.94849	1.88707	1.56201	1.29871	0.0246985	0.0247764	0.0250491	0.0255144	0.0268279	0.0267734	0.026884	46.5758	45.8269	45.309	44.8849	45.2531	41.3101	37.8287	1.18105	1.1099	1.06071	1.01631	0.995551	0.837942	0.712276	1.122	1.0544	1.00767	0.965493	0.945774
SWE	7.3	Road transport, mopeds and motorcycles	0.160954	0.162216	0.17332	0.161206	0.151682	0.141416	0.140165	12.9919	13.3203	13.5562	13.0967	15.0203	14.7179	13.0244	1.94416	2.03147	2.11848	2.07946	2.51769	2.44282	2.10999	0.00156994	0.00173657	0.00190122	0.00206591	0.00226854	0.00232886	0.00212808	0.193719	0.209076	0.218457	0.222625	0.247907	0.244427	0.223944	0.0909111	0.102909	0.112875	0.123877	0.132893	0.134915	0.121942	0.0863656	0.0977639	0.107231	0.117683	0.126249
SWE	7.4	Road transport, gasoline evaporation	0	0	0	0	0	0	0	0	0	0	0	0	0	0	0	0	0	0	0	0	0	0	0	0	0	0	0	0	0	0	0	0	0	0	0	0	0	0	0	0	0	0	0	0	0	0	0
SWE	7.5	Road transport, wear	0	0	0	0	0	0	0	0	0	0	0	0	0	0	0	0	0	0	0	0	0	0	0	0	0	0	0	0	0	0	0	0	0	0	0	8.39912	8.48017	8.44054	8.70305	9.04044	9.20246	9.25022	4.54248	4.58632	4.56499	4.70708	4.88954
SWE	8.1	Air transport (<1000m)	0.00872	0.01074	0.01062	0.00907	0.00869	0.00682	0.0056	2.83349	2.87936	2.96105	3.03802	3.01185	2.10132	1.85353	0.373295	0.45139	0.469421	0.430682	0.430612	0.395123	0.327114	0	0	0	0	0	0	0	2.84497	3.39465	3.55292	3.30884	3.26277	3.46546	2.75205	0.0122826	0.0139127	0.0141073	0.013522	0.0132921	0.0139966	0.0117944	0.0122826	0.0139127	0.0141073	0.013522	0.0132921
SWE	8.2	Rail transport	0.0032	0.00305	0.00297	0.00297	0.003	0.00297	0.0031	0.1648	0.158544	0.154514	0.154514	0.1571	0.154514	0.159	0.0758	0.0731595	0.071275	0.071275	0.0725	0.071275	0.071275	0.000155695	0.000150559	0.000146666	0.000155402	0.000149174	0.000151568	0.000151568	1.444	1.39743	1.3611	1.443	1.385	1.443	1.407	0.0955105	0.09236	0.0899721	0.0953308	0.0915105	0.0929789	0.0929789	0.090735	0.087742	0.0854735	0.0905642	0.0869349
SWE	8.3	Navigation, non-international	0	0	0	0	0	0	0	1.14073	1.14087	1.13976	1.13693	1.13384	1.13222	1.13495	1.81552	1.70134	1.648	1.67601	1.70377	1.72251	1.76168	0.015179	0.0143836	0.014	0.0118186	0.0103286	0.00944607	0.0147199	34.0432	31.5949	30.212	27.3123	24.214	22.7012	27.2774	1.14382	1.10839	1.083	0.944046	0.850776	0.782908	1.16681	1.1153	1.08076	1.056	0.920511	0.829566
SWE	8.4	Mobile machinery, agriculture	0	0	0	0	0	0	0	34.1924	35.0736	35.8334	36.3942	36.77	37.1865	37.6791	12.1146	12.2387	12.2683	12.1732	11.9549	11.7862	11.6839	0.00234468	0.00236011	0.00239493	0.00242919	0.00248906	0.00256064	0.00262527	9.47024	9.03499	8.71038	8.37356	8.09777	7.88288	7.77975	0.789975	0.767236	0.749605	0.732523	0.723771	0.726599	0.732208	0.748398	0.726855	0.710152	0.693969	0.685677
SWE	8.5	Mobile machinery, industry	0	0	0	0	0	0	0	9.57553	9.3777	9.4364	9.49652	9.46478	9.90192	9.4043	1.78173	1.68542	1.65437	1.62616	1.59017	1.75082	1.52616	0.00417964	0.0040884	0.00418796	0.00428784	0.00434391	0.00440357	0.00435844	16.7911	15.4098	14.8633	14.2555	13.415	12.6363	11.8857	0.904888	0.826368	0.794941	0.769614	0.748621	0.747726	0.72931	0.857263	0.782875	0.753102	0.729108	0.70922
SWE	8.6	Other mobile sources	0.00833	0.00803	0.00649	0.00659	0.00681	0.00317	0.00511	29.0287	29.1721	29.1972	29.3953	29.5453	28.6384	29.3565	4.01614	4.05394	4.02643	3.98587	3.92816	3.63575	3.80899	0.00353336	0.00341749	0.00375426	0.00354807	0.00314258	0.0029696	0.00270046	3.25526	3.23945	2.82536	2.69848	2.62382	2.30872	2.44953	0.183807	0.18665	0.174988	0.164305	0.160797	0.1589	0.1507	0.174641	0.177286	0.166225	0.156165	0.152698
SWE	9.1	Landfills	99.4175	98.427	91.5533	87.9383	80.0255	70.0408	65.1097	0	0	0	0	0	0	0	0	0	0	0	0	0	0	0	0	0	0	0	0	0	0	0	0	0	0	0	0	0	0	0	0	0	0	0	0	0	0	0	0
SWE	9.2	Controlled waste incineration	0.00075	0.00083	0.00104	0.00085	0.00087	0.00113	0.00086	0.022303	0.017777	0.017814	0.017574	0.0213	0.022501	0.021036	0.001348	0.001438	0.001255	0.0021	0.001756	0.00183113	0.00203849	0	0	0	0	0	0	0	0.12686	0.125629	0.12292	0.091357	0.081	0.088884	0.085349	0.00016	0.000222	0.001904	0.0029	0.001485	0.002445	0.00138	0.000144	0.0001998	0.0017136	0.00261	0.0013365
SWE	9.3	Other waste treatment	13.8859	13.8859	13.8859	13.9988	14.0785	14.2702	14.1796	0	0	0	0	0	0	0	0	0	0	0	0	0	0	0.9	0.9	0.9	0.9	0.9	0.9	0.9	0	0	0	0	0	0	0	0.210412	0.211463	0.212675	0.21389	0.215563	0.217327	0.218128	0.210412	0.211463	0.212675	0.21389	0.215563
SWE	10.1	Livestock, Cattle	130.164	132.089	131.198	130.819	128.636	127.56	126.852	0	0	0	0	0	0	0	0	0	0	0	0	0	0	27.09	27.71	26.86	26.64	25.17	25.54	24.15	0	0	0	0	0	0	0	0.433904	0.439276	0.432375	0.428202	0.418692	0.416875	0.412001	0.285244	0.288813	0.284318	0.281593	0.275431
SWE	10.2	Livestock, Poultry	5.90259	6.15809	6.3806	6.57417	6.53107	6.5855	6.43699	0	0	0	0	0	0	0	0	0	0	0	0	0	0	2.29	2.43	2.12	1.99	1.99	2.16	2.54	0	0	0	0	0	0	0	0.860342	0.935376	0.915772	0.916649	0.975943	0.983753	0.95411	0.12946	0.1438	0.141176	0.139935	0.150757
SWE	10.3	Livestock, Sheep	3.66912	3.81654	3.85749	4.14414	4.16806	4.29795	4.42658	0	0	0	0	0	0	0	0	0	0	0	0	0	0	0.83	0.86	0.88	0.96	0.96	1.03	1.02	0	0	0	0	0	0	0	0	0	0	0	0	0	0	0	0	0	0	0
SWE	10.4	Livestock, Goats	0.02816	0.02816	0.02816	0.02816	0.02816	0.02816	0.02816	0	0	0	0	0	0	0	0	0	0	0	0	0	0	0	0	0	0	0	0	0	0	0	0	0	0	0	0	0	0	0	0	0	0	0	0	0	0	0	0
SWE	10.5	Livestock, Pigs	8.64956	8.30636	9.09022	8.52926	7.94393	7.59363	7.31663	0	0	0	0	0	0	0	0	0	0	0	0	0	0	7.04	6.72	6.72	6.42	6.04	5.74	5.31	0	0	0	0	0	0	0	0.968241	0.924622	0.920657	0.855223	0.852679	0.818231	0.777191	0.154335	0.147393	0.146778	0.136312	0.135921
SWE	10.6	Livestock, Other animals	5.4902	5.4902	5.4902	5.4902	5.4902	5.4902	5.4902	0	0	0	0	0	0	0	0	0	0	0	0	0	0	3.59	3.58	3.85	3.85	3.85	3.54	3.22	0	0	0	0	0	0	0	0.054	0.050958	0.050958	0.050958	0.050958	0.050958	0.050958	0.036	0.033972	0.033972	0.033972	0.033972
SWE	10.7	Crops and pastures	0	0	0	0	0	0	0	0	0	0	0	0	0	0	0	0	0	0	0	0	0	5.76	5.66	5.95	5.94	6.29	5.78	5.91	0	0	0	0	0	0	0	0	0	0	0	0	0	0	0	0	0	0	0
SWE	10.8	Agricultural waste burning	0	0	0	0	0	0	0	0	0	0	0	0	0	0	0	0	0	0	0	0	0	0	0	0	0	0	0	0	0	0	0	0	0	0	0	0	0	0	0	0	0	0	0	0	0	0	0
SWE	10.9	Rice cultivation	0	0	0	0	0	0	0	0	0	0	0	0	0	0	0	0	0	0	0	0	0	0	0	0	0	0	0	0	0	0	0	0	0	0	0	0	0	0	0	0	0	0	0	0	0	0	0
SWE	10.10	Storage and handling of agricultural products	0	0	0	0	0	0	0	0	0	0	0	0	0	0	0	0	0	0	0	0	0	0	0	0	0	0	0	0	0	0	0	0	0	0	0	0	0	0	0	0	0	0	0	0	0	0	0
SWE	10.11	Other agriculture	0	0	0	0	0	0	0	0	0	0	0	0	0	0	0	0	0	0	0	0	0	0	0	0	0	0	0	0	0	0	0	0	0	0	0	2.426	2.36227	2.28412	2.27753	2.31058	2.44187	2.41491	0.258159	0.247966	0.229543	0.226354	0.228954
BGR	1.1	Power plants	0.27908	0.27391	0.27943	0.27623	0.31143	0.32687	0.31476	5.41963	5.34203	5.4071	5.43751	6.11014	6.3988	6.3988	2.9944	3.0122	3.03	3.0338	3.0392	3.0438	3.0484	0.0084	0.0036	0	0.0466	0.0944	0.1416	0.1888	75.476	74.9357	75.6948	76.394	86.4514	89.9351	49.4245	24.0147	24.3312	24.6476	20.1059	15.5642	11.0225	6.48074	12.477	12.5661	12.6552	10.4648	8.2735
BGR	1.2	Refineries	0.01493	0.01602	0.01739	0.01887	0.01913	0.01978	0.0231	0.183938	0.191267	0.196814	0.244579	0.240668	0.248216	0.248216	5.5252	5.742	5.96	5.923	5.886	5.8502	5.8136	0	0	0	0	0	0.0024	0.0032	1.6025	1.68578	1.76985	2.09264	2.08098	2.14821	0.00950303	0.28558	0.284477	0.28587	0.275116	0.264361	0.253607	0.243267	0.248352	0.250371	0.25239	0.243004	0.233618
BGR	2.1	Residential combustion (including commercial/institutional)	11.9454	11.1064	10.6801	11.4112	10.54	10.7856	10.1188	155.443	152.667	148.712	158.572	148.616	157.613	157.613	23.5216	23.573	23.6272	23.6164	23.61	23.6014	23.5928	0.246	0.2516	0.2572	0.2606	0.264	0.2698	0.274	4.38094	4.00359	3.8918	4.33172	3.97937	4.19679	3.48777	13.7756	14.171	14.5663	14.6275	14.6888	14.75	14.8112	12.8173	13.174	13.5307	13.5511	13.5714
BGR	2.2	Agricultural stationary combustion	0.1588	0.17772	0.23395	0.21985	0.22266	0.16526	0.16767	0	0	0	0	0	0	0	0	0	0	0	0	0	0	0	0	0	0	0	0	0	0	0	0	0	0	0	0.134784	0	0	0	0	0	0	0	0	0	0	0	0
BGR	34.1	Iron and steel industry (including coke ovens)	2.70895	2.30554	2.18767	2.14095	1.92175	0.99242	0.03091	3.71401	3.19515	2.92708	2.99751	2.98315	1.6096	1.6096	0	0	0	0	0	0	0	0	0	0	0	0	0	0	11.5974	9.79711	9.44567	9.8716	9.27731	5.50664	5.50664	11.7776	11.842	11.9064	11.5277	11.149	10.7703	10.3917	9.68703	9.75848	9.82992	9.50649	9.18306
BGR	34.2	Non-ferrous metal industry	0.01715	0.02432	0.01991	0.02051	0.0208	0.01981	0.01841	0.210882	0.329518	0.234286	0.243259	0.265991	0.238798	0.238798	0	0	0	0	0	0	0	0	0	0	0	0	0	0	0.711141	0.904025	0.804398	0.810284	0.74068	0.762365	0.762365	1.14482	1.14106	1.13731	1.09021	1.04311	0.996006	0.948904	1.08569	1.08238	1.07907	1.03435	0.989625
BGR	34.3	Chemical industry	0.42388	0.35313	0.33569	0.29746	0.28248	0.22401	0.11433	6.87829	7.84162	8.43269	7.69638	6.69392	4.41551	4.41551	9.8688	9.7936	9.72	9.634	9.5496	9.4644	9.3792	1.1096	1.0742	1.04	1.0444	1.0488	1.0544	1.0592	11.3198	11.9945	12.1534	11.0543	11.4335	10.2908	10.2908	2.8833	2.94663	3.00997	3.08035	3.15073	3.2211	3.29148	2.32347	2.37531	2.42715	2.48388	2.54061
BGR	34.4	Paper and pulp industry	0.05206	0.04924	0.08396	0.08037	0.08564	0.08903	0.02882	3.01455	2.83685	5.44247	5.28185	5.61864	5.99621	5.99621	0.026	0.033	0.04	0.0358	0.0328	0.0304	0.0272	0	0	0	0	0	0.0012	0.0016	1.06967	0.805494	1.00049	0.847762	0.96263	0.90239	0.90239	0.0197732	0.0223466	0.02492	0.0227656	0.0206112	0.0184568	0.0163024	0.0151512	0.0173656	0.01958	0.0170232	0.0159008
BGR	34.5	Cement industry	0	0	0	0	0	0	0	0	0	0	0	0	0	0	0	0	0	0	0	0	0	0	0	0	0	0	0	0	0	0	0	0	0	0	0	2.87922	2.84994	2.82066	2.90345	2.98625	3.06904	3.15184	1.85594	1.83707	1.81819	1.87156	1.92493
BGR	34.6	Other non-metallic minerals industry	0	0	0	0	0	0	0	0.00629537	0.0116216	0.0192302	0.0252142	0.0260156	0.026904	0.026904	0	0	0	0	0	0	0	0	0	0	0	0	0	0	0.0132902	0.0245346	0.040597	0.05323	0.0549219	0.0567973	0.0567973	0.542997	0.536058	0.52912	0.54285	0.55658	0.57031	0.58404	0.111847	0.109319	0.10679	0.108157	0.109523
BGR	34.7	Storage and handling in industry	0	0	0	0	0	0	0	0	0	0	0	0	0	0	0	0	0	0	0	0	0	0	0	0	0	0	0	0	0	0	0	0	0	0	0	1.10065	1.05748	1.01431	1.01798	1.02164	1.02531	1.02898	0.121228	0.118999	0.11677	0.11711	0.117449
BGR	34.8	Other industries	0.37851	0.34758	0.32895	0.35075	0.38727	0.28233	0.23071	13.7407	12.6874	10.3496	11.4732	11.9019	8.80644	8.80644	0.3056	0.3028	0.3	0.314	0.3308	0.3486	0.3648	0.6056	0.602	0.6	0.6012	0.6064	0.6108	0.6144	23.8793	21.3579	21.1215	22.1148	24.9877	16.3252	16.3252	1.82874	1.79521	1.76201	1.72788	1.69374	1.65961	1.62493	0.619755	0.604503	0.59025	0.580017	0.570783
BGR	5.1	Coal production	64.3468	63.2106	58.4718	61.3974	67.8217	68.6093	64.6095	0	0	0	0	0	0	0	0	0	0	0	0	0	0	0	0	0	0	0	0	0	0	0	0	0	0	0	0	0.93465	0.81525	0.69567	0.702266	0.708862	0.715459	0.722055	0.10843	0.101645	0.09486	0.0957596	0.0966592
BGR	5.2	Oil production	42.1465	39.7221	35.8693	37.0058	39.4424	39.0206	33.3688	0	0	0	0	0	0	0	0.2028	0.2014	0.2	0.206	0.212	0.218	0.224	0	0	0	0	0	0	0	0	0	0	0	0	0	0	0	0	0	0	0	0	0	0	0	0	0	0
BGR	5.3	Gas production	58.9492	63.7881	66.2044	68.5703	73.391	72.9227	62.6316	0	0	0	0	0	0	0	0.2728	0.2656	0.26	0.2572	0.2544	0.2516	0.2488	0	0	0	0	0	0	0	0	0	0	0	0	0	0	0	0	0	0	0	0	0	0	0	0	0	0
BGR	5.4	Gasoline distribution	0	0	0	0	0	0	0	0	0	0	0	0	0	0	3.104	2.922	2.74	2.6032	2.4664	2.3296	2.1928	0	0	0	0	0	0	0	0	0	0	0	0	0	0	0	0	0	0	0	0	0	0	0	0	0	0
BGR	5.5	Flaring	0	0	0	0	0	0	0	0	0	0	0	0	0	0	0	0	0	0	0	0	0	0	0	0	0	0	0	0	0	0	0	0	0	0	0.335863	0.0049288	0.0062394	0.00755	0.0073128	0.0070756	0.0068384	0.0066012	0.0049288	0.0062394	0.00755	0.0073128	0.0070756
BGR	6.1	Solvent and other product use	0	0	0	0	0	0	0	0	0	0	0	0	0	0	26.644	26.422	26.2	25.9296	25.6592	25.3888	25.1184	0	0	0	0	0	0	0	0	0	0	0	0	0	0	0	0	0	0	0	0	0	0	0	0	0	0
BGR	7.1	Road transport, light duty vehicles	0.756049	0.653785	0.667542	0.765225	0.679919	0.617815	0.621969	249.183	236.953	238.484	262.267	257.474	256.022	256.022	30.9364	30.0282	29.12	27.6454	26.1708	24.6962	23.2216	0.2236	0.2268	0.23	0.2472	0.266	0.2852	0.3036	65.3742	68.5852	74.7943	80.5496	77.3196	82.0383	81.8668	0.798078	0.819929	0.84459	0.794707	0.744825	0.694942	0.64506	0.796512	0.818386	0.84296	0.792871	0.742781
BGR	7.2	Road transport, heavy duty vehicles	0.120565	0.116648	0.132562	0.153045	0.136865	0.125319	0.127216	0	0	0	0	0	0	0	3.0404	3.2702	3.5	3.3422	3.1844	3.0278	2.8704	0.002	0.001	0	0.0016	0.0044	0.0066	0.0088	0	0	0	0	0	0	0	1.26443	1.36168	1.45894	1.39637	1.33379	1.27122	1.20864	1.26443	1.36168	1.45894	1.39631	1.33368
BGR	7.3	Road transport, mopeds and motorcycles	0.0495968	0.0355875	0.0284061	0.0367897	0.0367354	0.0374161	0.0421246	0	0	0	0	0	0	0	3.6752	3.1826	2.69	2.7526	2.8152	2.8778	2.9404	0	0	0	0	0	0	0	0	0	0	0	0	0	0	0.0642332	0.0574416	0.05065	0.0524072	0.0541644	0.0559216	0.0576788	0.0642332	0.0574416	0.05065	0.0524072	0.0541644
BGR	7.4	Road transport, gasoline evaporation	0	0	0	0	0	0	0	0	0	0	0	0	0	0	11.9856	11.0328	10.08	9.3346	8.5892	7.8438	7.0984	0	0	0	0	0	0	0	0	0	0	0	0	0	0	0	0	0	0	0	0	0	0	0	0	0	0
BGR	7.5	Road transport, wear	0	0	0	0	0	0	0	0	0	0	0	0	0	0	0	0	0	0	0	0	0	0	0	0	0	0	0	0	0	0	0	0	0	0	0	0.616414	0.676147	0.73588	0.752749	0.769618	0.786488	0.803357	0.196054	0.217007	0.23796	0.241783	0.245606
BGR	8.1	Air transport (<1000m)	0.0005	0.00041	0.00028	0.00052	0.00086	0.00028	0.0005	0.154	0.126	0.084	0.168	0.28	0.084	0.084	0.0816	0.0908	0.1	0.106	0.112	0.118	0.124	0	0	0	0	0	0	0	0.253	0.209	0.143	0.264	0.44	0.143	0.694909	0.0025964	0.0029182	0.00324	0.0033782	0.0035164	0.0036546	0.0037928	0.002388	0.002684	0.00298	0.0031074	0.0032348
BGR	8.2	Rail transport	0.00492	0.00494	0.00509	0.00504	0.00439	0.00562	0.00351	0.2996	0.3103	0.3103	0.3103	0.2675	0.3424	0.3424	0.2444	0.2272	0.21	0.2076	0.2052	0.2028	0.2004	0	0	0	0	0	0	0	1.1088	1.1484	1.1484	1.1484	0.99	1.2672	0.792	0.133144	0.124577	0.11601	0.113537	0.111065	0.108592	0.10612	0.12614	0.118025	0.10991	0.107566	0.105223
BGR	8.3	Navigation, non-international	0	0	0	0	0	0	0	0.022641	0.022641	0.022641	0.022641	0.022641	0.022641	0.022641	0.714417	0.666709	0.619	0.690563	0.762126	0.833689	0.905252	0.002	0.002	0.002	0.002	0.002	0.002	0.002	20.79	20.79	20.79	20.79	20.79	20.79	20.79	0.260359	0.26968	0.279	0.292807	0.306614	0.320421	0.334229	0.246353	0.255176	0.264	0.277127	0.290254
BGR	8.4	Mobile machinery, agriculture	0	0	0	0	0	0	0	0.997161	1.17347	1.77127	1.4094	1.40656	1.17188	1.17188	1.434	1.387	1.34	1.309	1.278	1.247	1.216	0	0	0	0	0	0.0012	0.0016	1.06583	1.03965	1.12437	1.09258	0.964642	0.600952	0	0.832224	0.799862	0.7675	0.744382	0.721265	0.698147	0.67503	0.788425	0.757768	0.72711	0.705208	0.683306
BGR	8.5	Mobile machinery, industry	0	0	0	0	0	0	0	0	0	0	0	0	0	0	0.1352	0.1376	0.14	0.1424	0.1448	0.1472	0.1496	0	0	0	0	0	0	0	0	0	0	0	0	0	0	0.0726292	0.0730896	0.07355	0.0738672	0.0741844	0.0745016	0.0748188	0.0688072	0.0692436	0.06968	0.0699804	0.0702808
BGR	8.6	Other mobile sources	0	0	0	0	0	0	0	0	0	0	0	0	0	0	0.9136	0.8518	0.79	0.8012	0.8124	0.8236	0.8348	0	0	0	0	0	0	0	0	0	0	0	0	0	0	0.0140396	0.0138098	0.01358	0.013053	0.012526	0.011999	0.011472	0.012914	0.012702	0.01249	0.0120058	0.0115216
BGR	9.1	Landfills	215.846	210.707	205.808	200.47	196.005	191.073	184.292	0	0	0	0	0	0	0	0	0	0	0	0	0	0	0	0	0	0	0	0	0	0	0	0	0	0	0	0	0	0	0	0	0	0	0	0	0	0	0	0
BGR	9.2	Controlled waste incineration	0	0	0	0	0	0	0	0	0	0	0	0	0	0	0	0	0	0	0	0	0	0	0	0	0	0	0	0	0	0	0	0	0	0	0.06589	0	0	0	0	0	0	0	0	0	0	0	0
BGR	9.3	Other waste treatment	70.9377	71.1112	35.5423	37.5228	37.4336	34.6823	32.6315	0	0	0	0	0	0	0	11.1364	11.0982	11.06	11.0316	11.0032	10.9748	10.9464	27.81	27.81	27.81	27.81	27.81	27.81	27.81	0	0	0	0	0	0	0	1.54271	1.53183	1.52095	1.51598	1.511	1.50603	1.50106	1.47531	1.46443	1.45355	1.44858	1.4436
BGR	10.1	Livestock, Cattle	73.6892	72.5487	70.3762	69.0542	64.6055	63.5716	59.8509	0	0	0	0	0	0	0	0	0	0	0	0	0	0	10.4888	10.5244	10.56	10.7178	10.8756	11.0334	11.1912	0	0	0	0	0	0	0	0.144315	0.143317	0.14232	0.144407	0.146493	0.14858	0.150666	0.032066	0.031843	0.03162	0.032085	0.03255
BGR	10.2	Livestock, Poultry	17.1592	17.7162	16.7451	17.1193	16.7437	15.6678	15.4132	0	0	0	0	0	0	0	0	0	0	0	0	0	0	5.9284	6.1492	6.37	6.2856	6.2012	6.1168	6.0324	0	0	0	0	0	0	0	0.836438	0.879314	0.92219	0.926492	0.930794	0.935097	0.939399	0.185874	0.195402	0.20493	0.205886	0.206842
BGR	10.3	Livestock, Sheep	11.775	11.5576	11.6036	11.3247	10.8177	10.3957	9.82257	0	0	0	0	0	0	0	0	0	0	0	0	0	0	0	0	0	0	0	0	0	0	0	0	0	0	0	0	0	0	0	0	0	0	0	0	0	0	0	0
BGR	10.4	Livestock, Goats	3.80252	3.70911	3.40876	2.97438	2.68416	2.37775	2.03171	0	0	0	0	0	0	0	0	0	0	0	0	0	0	0	0	0	0	0	0	0	0	0	0	0	0	0	0	0	0	0	0	0	0	0	0	0	0	0	0
BGR	10.5	Livestock, Pigs	10.847	10.4991	10.0216	10.456	10.1652	8.94082	8.09174	0	0	0	0	0	0	0	0	0	0	0	0	0	0	6.5428	5.8764	5.21	4.6816	4.1532	3.6248	3.0964	0	0	0	0	0	0	0	0.509563	0.458837	0.40811	0.369137	0.330164	0.291192	0.252219	0.0905872	0.0815686	0.07255	0.065622	0.058694
BGR	10.6	Livestock, Other animals	4.22715	3.89985	3.88899	3.83984	3.81034	4.2849	4.9331	0	0	0	0	0	0	0	0	0	0	0	0	0	0	6.0868	5.6084	5.13	4.961	4.792	4.623	4.454	0	0	0	0	0	0	0	0	0	0	0	0	0	0	0	0	0	0	0
BGR	10.7	Crops and pastures	0	0	0	0	0	0	0	0	0	0	0	0	0	0	0	0	0	0	0	0	0	0	0	0	0	0	0	0	0	0	0	0	0	0	0	0	0	0	0	0	0	0	0	0	0	0	0
BGR	10.8	Agricultural waste burning	1.865	1.865	1.865	1.865	1.865	1.865	1.865	11.6811	21.1449	17.4	16.3189	11.0971	11.0971	11.0971	2.4228	2.4214	2.42	2.4214	2.4228	2.4242	2.4256	0.3712	0.3706	0.37	0.3706	0.3712	0.3718	0.3724	0.06	0.06	0.06	0.06	0.06	0.06	0.06	2.03699	2.03699	2.03699	2.03699	2.03699	2.03699	2.03699	1.80747	1.80747	1.80747	1.80747	1.80747
BGR	10.9	Rice cultivation	2.2576	2.1588	1.8732	2.0328	2.5816	2.0168	3.3246	0	0	0	0	0	0	0	0	0	0	0	0	0	0	0	0	0	0	0	0	0	0	0	0	0	0	0	0	0	0	0	0	0	0	0	0	0	0	0	0
BGR	10.10	Storage and handling of agricultural products	0	0	0	0	0	0	0	0	0	0	0	0	0	0	0	0	0	0	0	0	0	0	0	0	0	0	0	0	0	0	0	0	0	0	0	0.207119	0.19855	0.18998	0.189981	0.189983	0.189984	0.189986	0.0350128	0.0342664	0.03352	0.0335214	0.0335228
BGR	10.11	Other agriculture	0	0	0	0	0	0	0	0	0	0	0	0	0	0	0	0	0	0	0	0	0	6.8324	6.7462	6.66	6.6594	6.6588	6.6582	6.6576	0	0	0	0	0	0	0	3.63313	3.63313	3.63313	3.63313	3.63313	3.63313	3.63314	0.807362	0.807361	0.80736	0.807361	0.807362
CYP	1.1	Power plants	0.12237	0.12788	0.13607	0.13983	0.14503	0.15076	0.15409	0.632456	0.658854	0.697118	0.719027	0.742661	0.248689	0.46016	0.0963343	0.100355	0.106184	0.109521	0.113121	0.117346	0.15268	0	0	0	0	0	0	0	6.28267	6.54491	6.92501	7.14266	7.47813	6.31755	7.42447	0.628267	0.654491	0.692501	0.649379	0.665049	0.592727	0.504143	0.37696	0.392695	0.415501	0.389627	0.399029
CYP	1.2	Refineries	0	0	0	0	0	0	0	0	0	0	0	0	0	0	0.92404	0.305774	0	0	0	0	0	0	0	0	0	0	0	0	0.08	0.04	0	0	0	0	0	0.027	0.0075	0	0	0	0	0	0.018	0.005	0	0	0
CYP	2.1	Residential combustion (including commercial/institutional)	0.05264	0.05606	0.06812	0.07456	0.10019	0.11495	0.13375	0.432262	0.358132	0.353591	0.325602	0.485458	0.289239	0.386231	0.113453	0.0949705	0.0897981	0.0854882	0.108377	0.0747407	0.0986394	0.000142138	0.000113464	0.00012954	0.000106934	0.000243668	0.00010029	0.000139062	0.348725	0.2977	0.258155	0.262945	0.22002	0.222761	0.286961	0.0448194	0.0368293	0.0376007	0.033751	0.0562773	0.0303563	0.0408994	0.0448194	0.0368293	0.0376007	0.033751	0.0562773
CYP	2.2	Agricultural stationary combustion	0.00678	0.00778	0.00902	0.01018	0.00986	0.01128	0.02227	0.0261922	0.0300526	0.029865	0.033496	0.0308046	0.0298416	0.0267281	0.00654805	0.00751315	0.00746626	0.008374	0.00770115	0.0074604	0.00668203	0	0	0	0	0	0	0	0.0654805	0.0751315	0.0746626	0.08374	0.0770115	0.074604	0.0668203	0.0140783	0.0161533	0.0160525	0.0180041	0.0165575	0.0160399	0.0143664	0.0108043	0.0123967	0.0123193	0.0138171	0.0127069
CYP	34.1	Iron and steel industry (including coke ovens)	0	0	0	0	0	0	0	5.0244e-05	3.3496e-05	1.6748e-05	0	0	0	0	0.000107961	8.1124e-05	3.1187e-05	0	0	0	0	0	0	0	0	0	0	0	0.00012561	8.374e-05	4.187e-05	0	0	0	0	0.000141486	0.000105304	4.14021e-05	0	0	0	0	0.000109766	8.17171e-05	3.21085e-05	0	0
CYP	34.2	Non-ferrous metal industry	0	0	0	0	0	0	0	0.0075366	0.0075366	0.00753158	0.00752488	0.0075366	0.00801898	0.00788265	0.00188415	0.00188415	0.00188289	0.00188122	0.00188415	0.00200474	0.00197066	0	0	0	0	0	0	0	0.0188415	0.0188415	0.0188289	0.0188122	0.0188415	0.0200474	0.0197066	0.00405092	0.00405092	0.00404822	0.00404462	0.00405092	0.0043102	0.00423692	0.00310885	0.00310885	0.00310677	0.00310401	0.00310885
CYP	34.3	Chemical industry	0	0	0	0	0	0	0	0.00336635	0.0033496	0.00318212	0.00316537	0.00241004	0.00145847	0.00143366	0.000841587	0.0008374	0.00079553	0.000791343	0.000602509	0.000364617	0.000358416	0	0	0	0	0	0	0	0.00841587	0.008374	0.0079553	0.00791343	0.00602509	0.00364617	0.00358416	0.00180941	0.00180041	0.00171039	0.00170139	0.00129539	0.000783926	0.000770593	0.00138862	0.00138171	0.00131262	0.00130572	0.00099414
CYP	34.4	Paper and pulp industry	0	0	0	0	0	0	0	0.00200976	0.00200976	0.00184228	0.00178366	0.00153077	0.00178251	0.00175387	0.00050244	0.00050244	0.00046057	0.000445916	0.000382692	0.000445627	0.000438467	0	0	0	0	0	0	0	0.0050244	0.0050244	0.0046057	0.00445916	0.00382692	0.00445627	0.00438467	0.00108025	0.00108025	0.000990225	0.000958718	0.000822787	0.000958099	0.000942704	0.000829026	0.000829026	0.000759941	0.000735761	0.000631441
CYP	34.5	Cement industry	0	0	0	0	0	0	0	0	0	0	0	0	0	0	0	0	0	0	0	0	0	0	0	0	0	0	0	0	0	0	0	0	0	0	0	1.55436	1.6445	1.68963	1.66552	1.75137	1.76148	1.33991	1.14985	1.21753	1.2515	1.23344	1.29735
CYP	34.6	Other non-metallic minerals industry	0	0	0	0	0	0	0	0.002367	0.002828	0.00225338	0.0020412	0.0018913	0.0017915	0.0017	0.0082845	0.009898	0.00788681	0.0071442	0.00661955	0.00627025	0.00595	0	0	0	0	0	0	0	0	0	0	0	0	0	0	0.676254	0.610079	0.449685	0.447649	0.454531	0.461818	0.416434	0.166749	0.15682	0.103491	0.0977601	0.0945628
CYP	34.7	Storage and handling in industry	0	0	0	0	0	0	0	0	0	0	0	0	0	0	0	0	0	0	0	0	0	0	0	0	0	0	0	0	0	0	0	0	0	0	0	0	0	0	0	0	0	0	0	0	0	0	0
CYP	34.8	Other industries	0.0621	0.0387	0.03935	0.03716	0.0374	0.04253	0.03137	3.05887	3.30003	3.30363	3.50119	3.50252	3.46616	2.85506	0.165161	0.177576	0.179424	0.190702	0.192547	0.188129	0.159154	0	0	0	0	0	0	0	2.42802	2.60026	2.55824	2.67062	2.63346	2.65867	2.21644	0.198364	0.210726	0.217512	0.214338	0.216478	0.220838	0.196146	0.152233	0.16172	0.168379	0.167055	0.169726
CYP	5.1	Coal production	0	0	0	0	0	0	0	0	0	0	0	0	0	0	0	0	0	0	0	0	0	0	0	0	0	0	0	0	0	0	0	0	0	0	0	0	0	0	0	0	0	0	0	0	0	0	0
CYP	5.2	Oil production	0	0	0	0	0	0	0	0	0	0	0	0	0	0	0	0	0	0	0	0	0	0	0	0	0	0	0	0	0	0	0	0	0	0	0	0	0	0	0	0	0	0	0	0	0	0	0
CYP	5.3	Gas production	0	0	0	0	0	0	0	0	0	0	0	0	0	0	0	0	0	0	0	0	0	0	0	0	0	0	0	0	0	0	0	0	0	0	0	0	0	0	0	0	0	0	0	0	0	0	0
CYP	5.4	Gasoline distribution	0	0	0	0	0	0	0	0	0	0	0	0	0	0	1.14182	1.24373	1.33111	0.872167	0.95	1.0874	1.119	0	0	0	0	0	0	0	0	0	0	0	0	0	0	0	0	0	0	0	0	0	0	0	0	0	0
CYP	5.5	Flaring	0	0	0	0	0	0	0	0.0136889	0.00393467	0	0	0	0	0	0.00228148	0.000655779	0	0	0	0	0	0	0	0	0	0	0	0	0.0616001	0.017706	0	0	0	0	0	0	0	0	0	0	0	0	0	0	0	0	0
CYP	6.1	Solvent and other product use	0	0	0	0	0	0	0	0	0	0	0	0	0	0	4.11462	4.95908	5.29558	6.14578	5.75437	4.77886	4.32904	0	0	0	0	0	0	0	0	0	0	0	0	0	0	0	0	0	0	0	0	0	0	0	0	0	0
CYP	7.1	Road transport, light duty vehicles	0.267106	0.276041	0.297252	0.318548	0.322056	0.337736	0.344379	21.9102	19.4015	17.291	16.2744	15.4779	14.3045	12.7226	2.67494	2.29071	1.97922	1.83306	1.78414	1.63617	1.42932	0.229631	0.229584	0.296141	0.293627	0.298201	0.296715	0.291609	6.0745	5.51183	5.10444	4.75698	4.68021	4.38806	3.90268	1.23381	0.725201	0.446354	0.413645	0.400336	0.367125	0.313638	1.23381	0.725201	0.446354	0.413645	0.400336
CYP	7.2	Road transport, heavy duty vehicles	0.04164	0.0422402	0.0445878	0.048547	0.0499257	0.0533267	0.0554649	1.12533	1.08331	1.10507	1.06419	1.096	1.11583	0.984279	0.415551	0.387466	0.391039	0.367687	0.354739	0.344971	0.289133	0.00109378	0.00108304	0.00110407	0.00109151	0.0012281	0.00131288	0.00120732	4.15908	4.02779	4.00869	3.86527	4.14485	4.28817	3.80537	0.268085	0.18422	0.142937	0.135246	0.133344	0.130704	0.110464	0.268085	0.18422	0.142937	0.135246	0.133344
CYP	7.3	Road transport, mopeds and motorcycles	0.0614444	0.0594591	0.0594504	0.0655051	0.0682084	0.0738073	0.0778164	2.7805	2.39432	2.14113	1.66196	1.74413	1.67386	1.5952	1.25883	1.01043	0.919734	0.571484	0.727287	0.632947	0.55433	0.000238877	0.00024785	0.000254355	0.000244076	0.000246834	0.000259337	0.000266687	0.0334708	0.0347155	0.0333081	0.034116	0.0395562	0.0428653	0.0429549	0.017841	0.0161624	0.0159668	0.0109734	0.0120387	0.0106729	0.00944057	0.017841	0.0161624	0.0159668	0.0109734	0.0120387
CYP	7.4	Road transport, gasoline evaporation	0	0	0	0	0	0	0	0	0	0	0	0	0	0	0.657952	0.599442	0.542037	0.486419	0.482658	0.424259	0.339832	0	0	0	0	0	0	0	0	0	0	0	0	0	0	0	0	0	0	0	0	0	0	0	0	0	0
CYP	7.5	Road transport, wear	0	0	0	0	0	0	0	0	0	0	0	0	0	0	0	0	0	0	0	0	0	0	0	0	0	0	0	0	0	0	0	0	0	0	0	0.166392	0.167247	0.170336	0.171281	0.182691	0.188125	0.183676	0.0888778	0.08933	0.0909765	0.0914923	0.0974747
CYP	8.1	Air transport (<1000m)	0	0	0	0	0	0	0	0.811444	0.838393	0.852799	0.852966	0.862922	1.00992	0.999421	0.0904	0.0934023	0.0950072	0.0950258	0.096135	0.11645	0.109256	0	0	0	0	0	0	0	0.723334	0.747356	0.760198	0.760347	0.769222	0.8225	0.787965	0.00545167	0.00563273	0.00572952	0.00573064	0.00579753	0.0059228	0.00649415	0.00545167	0.00563273	0.00572952	0.00573064	0.00579753
CYP	8.2	Rail transport	0	0	0	0	0	0	0	0	0	0	0	0	0	0	0	0	0	0	0	0	0	0	0	0	0	0	0	0	0	0	0	0	0	0	0	0	0	0	0	0	0	0	0	0	0	0	0
CYP	8.3	Navigation, non-international	0	0	0	0	0	0	0	0	0	0	0	0	0	0	0	0	0	0	0	0	0	0	0	0	0	0	0	0	0	0	0	0	0	0	0	0	0	0	0	0	0	0	0	0	0	0	0
CYP	8.4	Mobile machinery, agriculture	0	0	0	0	0	0	0	0.0921173	0.0981447	0.0975321	0.0968101	0.100365	0.0974556	0.0872932	0.0283451	0.0301998	0.0300113	0.0297891	0.030883	0.0299877	0.0268607	6.7368e-05	7.1776e-05	7.1328e-05	7.08e-05	7.34e-05	7.1272e-05	6.384e-05	0.295097	0.314406	0.312443	0.310131	0.32152	0.312198	0.279643	0.0146357	0.0155933	0.015496	0.0153813	0.0159461	0.0154838	0.0138692	0.0146357	0.0155933	0.015496	0.0153813	0.0159461
CYP	8.5	Mobile machinery, industry	0	0	0	0	0	0	0	0.14153	0.142067	0.142603	0.143139	0.143589	0.118078	0.116066	0.044682	0.0448513	0.0450205	0.0451898	0.0453319	0.0372778	0.0366427	0.0001056	0.000106	0.0001064	0.0001068	0.000107136	8.81011e-05	8.66002e-05	0.432854	0.434494	0.436134	0.437773	0.43915	0.361126	0.354974	0.0275352	0.0276395	0.0277438	0.0278481	0.0279357	0.0229724	0.022581	0.0275352	0.0276395	0.0277438	0.0278481	0.0279357
CYP	8.6	Other mobile sources	0.00164	0.00175	0.00174	0.00173	0.00179	0.00174	0	0	0	0	0	0	0	0	0	0	0	0	0	0	0	0	0	0	0	0	0	0	0	0	0	0	0	0	0	0	0	0	0	0	0	0	0	0	0	0	0
CYP	9.1	Landfills	26.6829	27.592	28.0903	28.7389	29.4698	28.2102	27.2178	0	0	0	0	0	0	0	0.0309143	0.032023	0.0331027	0.0339414	0.0346155	0.0348485	0.0349361	0	0	0	0	0	0	0	0	0	0	0	0	0	0	0	0	0	0	0	0	0	0	0	0	0	0
CYP	9.2	Controlled waste incineration	0	0	0	0	0	0	0	0.00035	0	0	0	0	0	0	8.75e-05	0	0	0	0	0	0	0	0	0	0	0	0	0	0.000175	0	0	0	0	0	0	0	0	0	0	0	0	0	0	0	0	0	0
CYP	9.3	Other waste treatment	1.98813	2.02742	2.04045	2.05945	2.11558	2.17918	2.18265	0	0	0	0	0	0	0	0.0125268	0.012842	0.0131367	0.0133617	0.0135253	0.0123867	0.0225347	0.0116357	0.0119352	0.0122093	0.0124052	0.0125741	0.0114682	0.0211029	0	0	0	0	0	0	0	0.00404663	0.00415079	0.00424608	0.00431422	0.00437295	0.00400951	0.00719579	0.00346687	0.00355611	0.00363775	0.00369613	0.00374644
CYP	10.1	Livestock, Cattle	6.09799	5.91222	6.09759	5.94026	5.822	5.90635	5.75107	0	0	0	0	0	0	0	0	0	0	0	0	0	0	1.0406	1.06338	1.00913	0.982857	0.962135	0.973296	0.951872	0.0107517	0.011092	0.0105609	0.0102888	0.0100506	0.010202	0.00996052	0.01704	0.017604	0.0167692	0.0163379	0.0159547	0.0162031	0.0158156	0.0111	0.0114752	0.0109336	0.0106526	0.0104012
CYP	10.2	Livestock, Poultry	1.30932	1.15664	1.13364	1.04165	1.0556	1.06314	1.13477	0	0	0	0	0	0	0	0	0	0	0	0	0	0	1.31405	1.25109	1.17216	1.02463	1.04572	1.0306	1.00264	0.00987467	0.00970907	0.00896203	0.00792409	0.00800277	0.00793479	0.00773985	0.25808	0.233724	0.227605	0.194267	0.205144	0.200732	0.195754	0.03668	0.034094	0.0327456	0.028228	0.0295035
CYP	10.3	Livestock, Sheep	2.2147	2.33523	2.25047	2.27825	2.17118	2.23736	1.859	0	0	0	0	0	0	0	0	0	0	0	0	0	0	0.28	0.293041	0.278631	0.278268	0.2646	0.276875	0.310944	0.00153333	0.00160475	0.00152584	0.00152385	0.001449	0.00151622	0.00170279	0	0	0	0	0	0	0	0	0	0	0	0
CYP	10.4	Livestock, Goats	2.14555	1.98828	1.73211	1.43173	1.78314	1.67478	0.9355	0	0	0	0	0	0	0	0	0	0	0	0	0	0	0.406	0.426552	0.382823	0.366083	0.3626	0.370128	0.248991	0.00222333	0.00233588	0.00209641	0.00200474	0.00198567	0.00202689	0.00136352	0	0	0	0	0	0	0	0	0	0	0	0
CYP	10.5	Livestock, Pigs	10.0061	9.64525	8.80924	9.27921	9.23106	9.53111	9.49689	0	0	0	0	0	0	0	0	0	0	0	0	0	0	1.86674	1.79843	1.76313	1.81104	1.82341	1.79606	1.77774	0.00055384	0.000541759	0.000530895	0.000547858	0.000553313	0.000532686	0.000525263	0.109174	0.103231	0.101259	0.103407	0.103705	0.105085	0.104486	0.017327	0.0163721	0.0160597	0.0163967	0.0164416
CYP	10.6	Livestock, Other animals	0	0	0	0	0	0	0	0	0	0	0	0	0	0	0	0	0	0	0	0	0	0.0814	0.0814	0.0814	0.0814	0.074	0.074	0.074	0.00110477	0.00110477	0.00110477	0.00110477	0.00100433	0.00100433	0.00100433	0.00099	0.00099	0.00099	0.00099	0.0009	0.0009	0.0009	0.00066	0.00066	0.00066	0.00066	0.0006
CYP	10.7	Crops and pastures	0	0	0	0	0	0	0	0	0	0	0	0	0	0	0	0	0	0	0	0	0	0.807148	0.793128	0.652241	0.504	0.391037	0.543155	0.529074	0	0	0	0	0	0	0	0.092352	0.129761	0.0975	0.0923863	0.0824819	0.0647306	0.0977028	0.003552	0.0049908	0.00375	0.00355332	0.00317238
CYP	10.8	Agricultural waste burning	0	0	0	0	0	0	0	0	0	0	0	0	0	0	0	0	0	0	0	0	0	0	0	0	0	0	0	0	0	0	0	0	0	0	0	0	0	0	0	0	0	0	0	0	0	0	0
CYP	10.9	Rice cultivation	0	0	0	0	0	0	0	0	0	0	0	0	0	0	0	0	0	0	0	0	0	0	0	0	0	0	0	0	0	0	0	0	0	0	0	0	0	0	0	0	0	0	0	0	0	0	0
CYP	10.10	Storage and handling of agricultural products	0	0	0	0	0	0	0	0	0	0	0	0	0	0	0	0	0	0	0	0	0	0	0	0	0	0	0	0	0	0	0	0	0	0	0	0	0	0	0	0	0	0	0	0	0	0	0
CYP	10.11	Other agriculture	0	0	0	0	0	0	0	0	0	0	0	0	0	0	0	0	0	0	0	0	0	0	0	0	0	0	0	0	0	0	0	0	0	0	0	0	0	0	0	0	0	0	0	0	0	0	0
CZE	1.1	Power plants	0.97602	1.0522	0.94605	0.96259	1.05551	1.0972	1.18313	11.7489	9.94389	9.26422	8.99732	9.55131	9.21543	8.07616	5.6884	5.7092	5.73	5.6948	5.6596	5.6244	5.5892	0.1156	0.1128	0.11	0.179	0.2496	0.3194	0.3892	112.671	112.661	112.65	101.502	90.3544	79.2066	68.0588	4.18725	3.75079	3.31434	3.13295	2.95156	2.77136	2.59093	3.33654	3.05379	2.7722	2.64743	2.52383
CZE	1.2	Refineries	0.03177	0.03089	0.03545	0.03918	0.03834	0.04032	0.03574	2.53547	2.52876	2.2098	2.11779	1.96268	1.78703	1.98523	3.9844	4.1922	4.4	4.429	4.4596	4.4906	4.5208	0.0012	0	0	0	0	0.0024	0.0032	3.5672	3.452	3.34	3.3704	3.4032	3.4348	3.4664	0.128995	0.124722	0.12045	0.121608	0.122766	0.123925	0.123417	0.0998844	0.0973022	0.09472	0.0956182	0.0955532
CZE	2.1	Residential combustion (including commercial/institutional)	18.3753	18.9737	19.3596	23.5854	21.3489	20.2244	20.371	281.444	293.829	256.855	272.888	240.031	242.229	251.764	31.2707	30.5967	29.9227	29.8409	29.7607	29.6797	29.5987	0.611864	0.565464	0.521864	0.516264	0.512264	0.508664	0.504264	16.5077	16.2013	15.8949	15.9419	15.9889	16.0359	16.0829	19.1422	17.78	16.4179	16.2904	16.1629	16.0354	15.9079	17.4381	16.3184	15.1988	15.0983	14.9978
CZE	2.2	Agricultural stationary combustion	0.74259	0.57884	0.49383	0.55926	0.42213	0.4139	0.53433	0	0	0	0	0	0	0	0	0	0	0	0	0	0	0	0	0	0	0	0	0	0	0	0	0	0	0	0	0	0	0	0	0	0	0	0	0	0	0	0
CZE	34.1	Iron and steel industry (including coke ovens)	3.79433	3.8325	3.6315	3.70399	3.67778	3.49141	2.62675	177.576	176.773	166.088	164.109	129.277	124.13	143.79	0	0	0	0	0	0	0	0	0	0	0	0	0	0	4.1736	3.9968	3.82	3.6224	3.4248	3.2272	3.0296	2.55106	2.39151	2.23195	2.12166	2.01137	1.90109	1.7908	1.90881	1.80699	1.70517	1.62239	1.53961
CZE	34.2	Non-ferrous metal industry	0.01436	0.01203	0.01233	0.0135	0.01316	0.00941	0.00779	0.0513454	0.0500066	0.049302	0.0495571	0.0363085	0.0362778	0.0416898	0	0	0	0	0	0	0	0	0	0	0	0	0	0	0	0	0	0	0	0	0	0.0247104	0.0213802	0.01805	0.017824	0.017598	0.017372	0.017146	0.0206844	0.0180572	0.01543	0.0152338	0.0150376
CZE	34.3	Chemical industry	0.81898	1.00943	1.0276	0.95737	0.76476	1.48201	1.51202	6.422	6.25456	6.16643	6.19833	4.54128	4.53744	5.21433	5.0252	4.942	4.86	4.8556	4.8524	4.8486	4.8448	0.9132	0.9116	0.91	0.9138	0.9192	0.9238	0.9284	5.3108	5.0654	4.82	4.4906	4.1612	3.8318	3.5024	1.63749	1.63512	1.63276	1.58526	1.53679	1.48832	1.43985	1.25419	1.2628	1.2714	1.25067	1.22919
CZE	34.4	Paper and pulp industry	0.1622	0.16872	0.34532	0.36087	0.3962	0.35264	0.36335	12.809	12.475	12.2992	12.3629	9.05779	9.05013	10.4002	0.2292	0.2934	0.36	0.3066	0.2532	0.1998	0.1464	0.018	0.024	0.03	0.0252	0.0216	0.0186	0.0148	1.0276	1.1738	1.32	1.1362	0.9524	0.7686	0.5848	0.11414	0.12487	0.1356	0.113581	0.0915624	0.0695436	0.0475248	0.0861968	0.0977334	0.10927	0.0918198	0.0743696
CZE	34.5	Cement industry	0	0	0	0	0	0	0	0	0	0	0	0	0	0	0	0	0	0	0	0	0	0	0	0	0	0	0	0	6.7128	6.2764	5.84	5.9124	5.9848	6.0572	6.1296	0.220116	0.218858	0.2176	0.220235	0.22287	0.225504	0.228139	0.19422	0.19311	0.192	0.194325	0.19665
CZE	34.6	Other non-metallic minerals industry	0	0	0	0	0	0	0	2.09002	2.03552	2.00684	2.01722	1.47794	1.47669	1.69698	0	0	0	0	0	0	0	0	0	0	0	0	0	0	3.5344	3.2772	3.02	2.9164	2.8128	2.7092	2.6056	0.0567772	0.0574586	0.05814	0.0585958	0.0590516	0.0595074	0.0599632	0.0456692	0.0463946	0.04712	0.0474474	0.0477748
CZE	34.7	Storage and handling in industry	0	0	0	0	0	0	0	0	0	0	0	0	0	0	0	0	0	0	0	0	0	0	0	0	0	0	0	0	0	0	0	0	0	0	0	3.40682	3.26824	3.12966	3.02622	2.92278	2.81934	2.7159	0.363874	0.349407	0.33494	0.324502	0.314064
CZE	34.8	Other industries	0.85853	0.79493	0.7454	0.75355	0.76639	0.78308	0.66264	9.97518	9.71509	9.5782	9.62775	7.05388	7.04792	8.09932	1.0084	0.9792	0.95	0.9614	0.9752	0.9878	1.0004	0.0124	0.0098	0.01	0.0176	0.0264	0.0358	0.0444	10.9556	10.0478	9.14	8.695	8.25	7.8062	7.3616	1.31494	1.21774	1.12054	1.08792	1.05673	1.02481	0.992893	0.686771	0.640681	0.59459	0.571445	0.548301
CZE	5.1	Coal production	228.41	222.225	221.661	236.391	217.672	212.576	191.15	0	0	0	0	0	0	0	0	0	0	0	0	0	0	0	0	0	0	0	0	0	0	0	0	0	0	0	0	1.95942	1.9381	1.91678	1.85789	1.799	1.7401	1.68121	0.267178	0.264269	0.26136	0.253331	0.245303
CZE	5.2	Oil production	238.24	234.459	242.033	255.241	235.858	226.397	206.014	0	0	0	0	0	0	0	0.0024	0.0012	0	0.0014	0.0028	0.0042	0.0056	0	0	0	0	0	0	0	0	0	0	0	0	0	0	0	0	0	0	0	0	0	0	0	0	0	0
CZE	5.3	Gas production	70.1742	60.3788	54.7101	61.4498	60.7906	62.8435	62.0296	0	0	0	0	0	0	0	0.3452	0.3418	0.34	0.3404	0.3408	0.3412	0.3416	0	0	0	0	0	0	0	0	0	0	0	0	0	0	0	0	0	0	0	0	0	0	0	0	0	0
CZE	5.4	Gasoline distribution	0	0	0	0	0	0	0	0	0	0	0	0	0	0	5.2996	5.3098	5.32	5.0374	4.7548	4.4722	4.1896	0	0	0	0	0	0	0	0	0	0	0	0	0	0	0	0	0	0	0	0	0	0	0	0	0	0
CZE	5.5	Flaring	0	0	0	0	0	0	0	0.0642205	0.0625601	0.0609	0.0869204	0.102817	0.118715	0.12974	0	0	0	0	0	0	0	0	0	0	0	0	0	0	0.0012	0	0	0	0.0012	0.0018	0.0024	0.0040216	0.0042508	0.00448	0.0044376	0.0043952	0.0043528	0.0043104	0.0040216	0.0042508	0.00448	0.0044376	0.0043952
CZE	6.1	Solvent and other product use	0	0	0	0	0	0	0	0	0	0	0	0	0	0	74.5064	72.8732	71.24	69.7158	68.1916	66.6674	65.1432	0	0	0	0	0	0	0	0	0	0	0	0	0	0	0	0	0	0	0	0	0	0	0	0	0	0
CZE	7.1	Road transport, light duty vehicles	1.08055	0.989465	0.958361	0.895243	0.880391	0.794402	0.785141	290.968	256.842	230.056	207.49	192.875	178.018	156.133	37.238	33.674	30.11	28.2212	26.3324	24.4436	22.5548	1.7388	1.8444	1.95	1.8068	1.6636	1.5216	1.3788	45.1508	44.5504	43.95	42.7416	41.5332	40.3248	39.1164	2.56806	2.64553	2.723	2.83272	2.94243	3.05215	3.16187	2.56713	2.64493	2.72273	2.83247	2.9422
CZE	7.2	Road transport, heavy duty vehicles	0.152862	0.150827	0.158261	0.152082	0.154225	0.144055	0.148003	18.838	16.6285	14.8944	13.4334	12.4872	11.5253	10.1085	3.2668	2.9884	2.71	2.7884	2.8668	2.9452	3.0236	0.018	0.019	0.02	0.0218	0.0236	0.0254	0.0272	47.7008	49.3354	50.97	50.3382	49.7064	49.0746	48.4428	1.42028	1.31959	1.2189	1.24767	1.27643	1.3052	1.33397	1.42017	1.31948	1.2188	1.24757	1.27633
CZE	7.3	Road transport, mopeds and motorcycles	0.468086	0.471828	0.505557	0.487765	0.496763	0.466143	0.481296	125.538	110.814	99.2572	89.521	83.2154	76.8055	67.3634	57.4364	58.2282	59.02	57.2144	55.4088	53.6032	51.7976	0.002	0.001	0	0.0022	0.0044	0.0078	0.0104	0.514	0.592	0.67	0.9212	1.1724	1.4236	1.6748	0.927309	0.942534	0.95776	0.941477	0.925193	0.90891	0.892626	0.927309	0.942534	0.95776	0.941477	0.925193
CZE	7.4	Road transport, gasoline evaporation	0	0	0	0	0	0	0	0	0	0	0	0	0	0	9.736	8.383	7.03	6.5448	6.0596	5.5744	5.0892	0	0	0	0	0	0	0	0	0	0	0	0	0	0	0	0	0	0	0	0	0	0	0	0	0	0
CZE	7.5	Road transport, wear	0	0	0	0	0	0	0	0	0	0	0	0	0	0	0	0	0	0	0	0	0	0	0	0	0	0	0	0	0	0	0	0	0	0	0	1.66556	1.7914	1.91725	1.97546	2.03367	2.09187	2.15008	0.535605	0.578252	0.6209	0.641189	0.661478
CZE	8.1	Air transport (<1000m)	0.00284	0.0029	0.00232	0.00285	0.0055	0.00767	0.00232	2.47361	2.47361	2.47361	2.47361	2.47361	2.47361	2.47361	0.1504	0.1652	0.18	0.1856	0.1912	0.1968	0.2024	0	0	0	0	0	0	0	0.0924	0.1012	0.11	0.114	0.118	0.122	0.126	0.00462	0.005095	0.00557	0.0057136	0.0058572	0.0060008	0.0061444	0.004248	0.004684	0.00512	0.005253	0.005386
CZE	8.2	Rail transport	0.01811	0.01791	0.01712	0.0189	0.0187	0.02067	0.019	0.9275	0.9275	0.9275	0.9275	0.9275	0.9275	0.9275	0.714	0.682	0.65	0.6498	0.6496	0.6494	0.6492	0	0	0	0	0	0	0	4.9252	4.7176	4.51	4.5058	4.5016	4.4974	4.4932	0.384628	0.367924	0.35122	0.349122	0.347023	0.344925	0.342826	0.364388	0.348564	0.33274	0.330751	0.328762
CZE	8.3	Navigation, non-international	0	0	0	0	0	0	0	0.0599287	0.0599287	0.0599287	0.0599287	0.0599287	0.0599287	0.0599287	0.00282048	0.00291024	0.003	0.00323562	0.00347124	0.00370686	0.00394248	0	0	0	0	0	0	0	0.0497646	0.0524648	0.055165	0.0582717	0.0613783	0.064485	0.0675916	0.00363724	0.00381862	0.004	0.00420141	0.00440282	0.00460423	0.00480564	0.00346828	0.00364064	0.003813	0.00400429	0.00419557
CZE	8.4	Mobile machinery, agriculture	0	0	0	0	0	0	0	2.95	2.95	2.95	2.95	2.95	2.95	2.95	2.47	2.28	2.09	2.056	2.022	1.988	1.954	0.002	0.001	0	0	0.0016	0.0024	0.0032	16.87	15.56	14.25	13.959	13.668	13.377	13.086	1.43432	1.31456	1.1948	1.16718	1.13955	1.11193	1.08431	1.35883	1.24537	1.13191	1.10574	1.07957
CZE	8.5	Mobile machinery, industry	0	0	0	0	0	0	0	1.35	1.35	1.35	1.35	1.35	1.35	1.35	1.8888	2.0294	2.17	2.117	2.064	2.011	1.958	0	0	0	0	0.0016	0.0024	0.0032	12.8444	13.7772	14.71	14.263	13.816	13.369	12.922	0.995111	1.0554	1.11568	1.08038	1.04509	1.00979	0.9745	0.942737	0.999848	1.05696	1.02352	0.990085
CZE	8.6	Other mobile sources	0.07624	0.07831	0.07792	0.07501	0.07826	0.08157	0.0816	23.49	23.49	23.49	23.49	23.49	23.49	23.49	6.4944	6.3572	6.22	6.1228	6.0256	5.9284	5.8312	0.0012	0	0	0.0018	0.0036	0.0054	0.0072	0.3576	0.3488	0.34	0.35	0.36	0.37	0.38	0.14446	0.136385	0.12831	0.122817	0.117324	0.111832	0.106339	0.132906	0.125478	0.11805	0.112996	0.107941
CZE	9.1	Landfills	106.687	109.254	111.7	112.693	111.643	116.473	120.423	0	0	0	0	0	0	0	0	0	0	0	0	0	0	0	0	0	0	0	0	0	0	0	0	0	0	0	0	0	0	0	0	0	0	0	0	0	0	0	0
CZE	9.2	Controlled waste incineration	0.00012	0.00012	0.00011	0.00011	0.00012	0.00012	0.00011	0	0	0	0	0	0	0	0	0	0	0	0	0	0	0	0	0	0	0	0	0	0	0	0	0	0	0	0	0	0	0	0	0	0	0	0	0	0	0	0
CZE	9.3	Other waste treatment	24.5727	24.435	24.32	24.86	24.493	24.4878	24.1817	5.69443	5.54721	5.4	7.70723	9.11681	10.5264	11.504	29.952	29.651	29.35	28.7676	28.1852	27.6028	27.0204	1.95	1.95	1.95	1.95	1.95	1.95	1.95	0.1208	0.1204	0.12	0.1204	0.1208	0.1212	0.1216	2.01021	2.00876	2.0073	2.01169	2.01608	2.02047	2.02486	1.92091	1.91946	1.918	1.92239	1.92678
CZE	10.1	Livestock, Cattle	124.804	120.914	121.07	118.669	119.702	122.107	119.841	0	0	0	0	0	0	0	0	0	0	0	0	0	0	28.4652	27.5126	26.56	26.4034	26.2468	26.0902	25.9336	0	0	0	0	0	0	0	0.407531	0.394206	0.38088	0.376065	0.371249	0.366434	0.361618	0.0905564	0.0875932	0.08463	0.0835618	0.0824936
CZE	10.2	Livestock, Poultry	2.09609	1.98853	1.979	2.00741	1.91818	2.13073	2.0663	0	0	0	0	0	0	0	0	0	0	0	0	0	0	9.0044	8.6472	8.29	7.9706	7.6512	7.3318	7.0124	0	0	0	0	0	0	0	1.48616	1.47629	1.46642	1.4898	1.51318	1.53657	1.55995	0.330256	0.328063	0.32587	0.331066	0.336262
CZE	10.3	Livestock, Sheep	0.84357	0.95004	1.147	1.21212	1.38411	1.50696	1.49877	0	0	0	0	0	0	0	0	0	0	0	0	0	0	0	0	0	0	0	0	0	0	0	0	0	0	0	0	0	0	0	0	0	0	0	0	0	0	0	0
CZE	10.4	Livestock, Goats	0.06656	0.06144	0.06656	0.07168	0.08192	0.08704	0.08704	0	0	0	0	0	0	0	0	0	0	0	0	0	0	0	0	0	0	0	0	0	0	0	0	0	0	0	0	0	0	0	0	0	0	0	0	0	0	0	0
CZE	10.5	Livestock, Pigs	15.1335	14.0715	12.9465	12.78	12.735	10.9485	8.8695	0	0	0	0	0	0	0	0	0	0	0	0	0	0	15.6536	14.9418	14.23	13.4814	12.7328	11.9842	11.2356	0	0	0	0	0	0	0	1.29405	1.24189	1.18973	1.15635	1.12296	1.08958	1.0562	0.230048	0.220774	0.2115	0.205567	0.199633
CZE	10.6	Livestock, Other animals	0.3878	0.3878	0.40719	0.44597	0.46536	0.52353	0.54292	0	0	0	0	0	0	0	0	0	0	0	0	0	0	7.8736	7.8768	7.88	7.8626	7.8452	7.8278	7.8104	0	0	0	0	0	0	0	0	0	0	0	0	0	0	0	0	0	0	0
CZE	10.7	Crops and pastures	0	0	0	0	0	0	0	0	0	0	0	0	0	0	0	0	0	0	0	0	0	0	0	0	0	0	0	0	0	0	0	0	0	0	0	0	0	0	0	0	0	0	0	0	0	0	0
CZE	10.8	Agricultural waste burning	4.417	4.417	4.417	4.417	4.417	4.417	4.417	66.5598	100.952	88.2	75.4476	82.369	82.369	82.859	1.2424	1.2412	1.24	1.2412	1.2424	1.2436	1.2448	0	0	0	0	0	0	0	0	0	0	0	0	0	0	0	0	0	0	0	0	0	0	0	0	0	0
CZE	10.9	Rice cultivation	0	0	0	0	0	0	0	0	0	0	0	0	0	0	0	0	0	0	0	0	0	0	0	0	0	0	0	0	0	0	0	0	0	0	0	0	0	0	0	0	0	0	0	0	0	0	0
CZE	10.10	Storage and handling of agricultural products	0	0	0	0	0	0	0	0	0	0	0	0	0	0	0	0	0	0	0	0	0	0	0	0	0	0	0	0	0	0	0	0	0	0	0	0.251893	0.251891	0.25189	0.251891	0.251893	0.251894	0.251896	0.0444508	0.0444504	0.04445	0.0444504	0.0444508
CZE	10.11	Other agriculture	0	0	0	0	0	0	0	0	0	0	0	0	0	0	0	0	0	0	0	0	0	15.6516	16.2408	16.83	17.3372	17.8444	18.3516	18.8588	0	0	0	0	0	0	0	2.61923	2.61923	2.61923	2.61923	2.61923	2.61923	2.61924	0.582051	0.582051	0.58205	0.582051	0.582051
EST	1.1	Power plants	0.37034	0.39229	0.43232	0.36505	0.34659	0.38438	0.4446	5.76	8.99	9.37	7.54	5.04	4.60185	5.4	0.38	0.78	0.86	0.7	0.46	0.44908	0.421547	0	0	0	0	0	0	0	15.32	13.93	12.09	10.56	13.71	11.942	10.3144	10.77	10.55	8.4	4.96	11.35	6.1292	5.19672	4.045	4.96	4.19	2.53	5.4
EST	1.2	Refineries	0	0	0	0	0	0	0	0	0	0	0.06	0	0.0191017	0.0185619	0.02	0.61	0.59	0.38	0.18	0.429212	0.398133	0	0	0	0	0	0	0	0	0	0	0	0	0.0026311	0.004147	0	0	0	0	0	0.0138017	0.06536	0	0	0	0	0
EST	2.1	Residential combustion (including commercial/institutional)	0.9297	1.04902	0.90569	0.83592	0.92815	0.93712	0.96823	92.87	94.13	81.31	78.34	99.65	103.116	107.843	14.61	14.7	12.68	12.27	15.8	16.3916	17.1534	0.06	0.06	0.05	0.05	0.06	0.06602	0.06937	1.89	1.83	1.64	1.57	1.91	1.9071	1.89792	11.286	11.26	9.86	9.43	11.9	12.1005	12.6274	11.069	11.06	9.64	9.29	11.77
EST	2.2	Agricultural stationary combustion	0.03329	0.0342	0.02626	0.03025	0.02596	0.01689	0.01596	0.28	0.29	0.35	0.73	0.24	0.201257	0.244496	0.03	0.03	0.03	0.07	0.02	0.106651	0.0183098	0	0	0	0	0	0	0.003712	0.04	0.05	0.04	0.11	0.1	0.0801431	0.0801697	0.152	0.16	0.19	0.35	0.11	0.0968386	0.114842	0.132	0.14	0.16	0.33	0.09
EST	34.1	Iron and steel industry (including coke ovens)	0.00769	0.00815	0.0089	0.00844	0.00798	0.01078	0.01307	13.61	12.38	13.18	10.03	13.1	16.2751	19.6279	1.633	1.09	1.38	0.88	1.15	1.3002	1.43374	0	0	0	0	0	0.001679	0.0004857	0.37	0.26	0.31	0.33	0.41	0.372426	0.327768	0.677	0.43	0.56	0.47	0.64	0.414653	0.627344	0.251	0.17	0.29	0.23	0.31
EST	34.2	Non-ferrous metal industry	1e-05	3e-05	2e-05	2e-05	0.0001	7e-05	8e-05	0.03	0.03	0.01	0.02	0	0.0051772	0.0042662	0.015	0.01	0.01	0.01	0	0.0006485	0.0004712	0.05	0.03	0.06	0.08	0.06	0.0331181	0.0661613	0.021	0.01	0.01	0.03	0	0.0032949	0.0031738	0.063	0.06	0.04	0.03	0	0.00322485	0.00213308	0.039	0.03	0.01	0.01	0
EST	34.3	Chemical industry	0.00439	0.00312	0.00355	0.00268	0.00553	0.00257	0.00036	0.27	0.33	0.29	0.33	0.36	0.397689	0.363756	1.065	0.96	0.72	0.41	0.12	0.0302179	0.0223688	0.05	0.08	0.13	0.06	0.071	0.131805	0.0112818	0.13	0.32	0.16	0.23	0.2	0.255036	0.0248001	0.048	0.12	0.1	0.09	0.07	0.170855	0.0260254	0.016	0.04	0.03	0.03	0.02
EST	34.4	Paper and pulp industry	8e-05	0.0003	0.00034	0.00013	0.00019	0.00011	8e-05	0	0	0.02	0.11	0.02	0.028084	0.026235	0.014	0.02	0.02	0.03	0.04	0.0241769	0.0116123	0	0	0	0	0	0	0	0.02	0.02	0	0.1	0.01	0.018279	0.016916	0.069	0.07	0.07	0.09	0.06	0.0723887	0.160569	0.023	0.02	0.02	0.03	0.02
EST	34.5	Cement industry	0	0	0	0	0	0	0	0	0	0	0	0	0	0	0	0	0	0	0	0	0	0	0	0	0	0	0	0	0	0	0	0	0	0	0	0.001	0	0	0	0	0.0004274	0.00216853	0.001	0	0	0	0
EST	34.6	Other non-metallic minerals industry	0	0	0	0	0	0	0	0	0	0	0	0	0.0034755	0.0059671	0.014	0.018	0.019	0.024	0.024	0.0240637	0.016	0	0	0	0	0	0	0	0	0	0	0	0.01	0.0027799	0.007383	0.120523	0.139839	0.136841	0.174638	0.160781	0.158011	0.260705	0.0239523	0.0199839	0.0286841	0.0304638	0.0220781
EST	34.7	Storage and handling in industry	0	0	0	0	0	0	0	0.01	0.01	0.02	0.03	0	0	0	0.09	0.07	0.08	0.08	0	0.0110478	0.0459187	0.01	0	0	0	0	0	0.0008081	0	0.01	0.01	0.01	0	0	0	0.377	0.42	0.38	0.44	0	0.0015244	0.00166716	0.126	0.14	0.13	0.07	0
EST	34.8	Other industries	0.0223	0.01797	0.01815	0.02186	0.02911	0.02382	0.01282	8.75	9.76	10.63	5.84	6.14	9.39938	5.18788	1.6843	1.72809	1.65411	1.4886	1.49846	1.80219	1.38543	0.01	0.01	0.01	0.01	0	0.0091297	0.0057093	2.37	2.19	2.14	2.03	2.07	2.32658	1.3334	4.401	4.87	4.88	2.08	2.32	4.11249	2.30845	4.045	4.35	4.3	1.58	1.56
EST	5.1	Coal production	0	0	0	0	0	0	0	0.35	0.26	0.17	0.19	0.22	0.25955	0.152201	0	0	0	0	0	2.6e-05	4e-05	0	0.01	0.05	0.06	0.09	0.101834	0.0890737	0.01	0	0.01	0.01	0.01	0.017176	0.0344154	0.097	0.07	0.09	0.11	0.09	0.0913719	0.0923	0.01	0.01	0.01	0.01	0.01
EST	5.2	Oil production	0	0	0	0	0	0	0	0	0	0	0	0	0	0	0	0	0	0	0	0	0	0	0	0	0	0	0	0	0	0	0	0	0	0	0	0	0	0	0	0	0	0	0	0	0	0	0
EST	5.3	Gas production	20.172	23.7733	24.4907	24.8035	24.669	23.6168	15.972	0	0	0	0	0	0	0	0.032	0.036	0.028	0.028	0.028	0.027	0.018	0	0	0	0	0	0	0	0	0	0	0	0	0	0	0	0	0	0	0	0	0	0	0	0	0	0
EST	5.4	Gasoline distribution	0	0	0	0	0	0	0	0	0	0	0	0	0	0	4.352	4.538	3.666	3.108	1.714	1.137	1.266	0	0	0	0	0	0.000562	0	0	0	0	0	0	0	0	0	0	0	0	0	0	0	0	0	0	0	0
EST	5.5	Flaring	0	0	0	0	0	0	0	0	0	0	0	0	0	0.0006014	0	0	0	0	0	0	0.00203	0	0	0	0	0	0	0	0	0	0	0	0	0	0.0006014	0	0	0	0	0	0	0	0	0	0	0	0
EST	6.1	Solvent and other product use	0	0	0	0	0	0	0	0	0	0.02	0	0	0.0045284	0.0016716	8.4643	8.5799	9.09112	9.95043	9.90612	7.87065	5.84687	0	0	0.01	0	0	0.0014814	0.0012555	0	0	0	0	0	1e-07	1.61e-05	0.007	0	0.01	0.01	0	0.0171518	1.6e-05	0.003	0	0.01	0.01	0
EST	7.1	Road transport, light duty vehicles	0.320303	0.285154	0.278292	0.270013	0.253942	0.22013	0.184304	44.8734	37.9569	36.1507	34.0118	31.0402	25.6144	22.7934	4.85747	4.14944	4.02933	3.84857	3.51722	2.8816	2.56486	0.157191	0.21993	0.210262	0.236812	0.25204	0.249523	0.224881	7.002	6.4508	6.37136	6.36936	6.1454	5.24307	4.59006	0.269699	0.33778	0.310982	0.29378	0.289701	0.254064	0.21901	0.269699	0.33778	0.310982	0.29378	0.289701
EST	7.2	Road transport, heavy duty vehicles	0.0332739	0.0321489	0.0371056	0.0343619	0.0321119	0.0269718	0.0217868	1.62708	1.59585	1.59844	1.61157	1.54808	1.48295	1.11856	0.531118	0.474849	0.438943	0.438779	0.402119	0.388822	0.26347	0.00190598	0.00193236	0.00184556	0.0019355	0.00197723	0.00205275	0.00167682	6.90109	6.99601	6.90942	6.86772	6.72188	6.4379	4.94656	0.210677	0.217558	0.203957	0.191385	0.177731	0.163401	0.112491	0.210677	0.217558	0.203957	0.191385	0.177731
EST	7.3	Road transport, mopeds and motorcycles	0.0178133	0.0172466	0.0185528	0.0206547	0.0221461	0.0217784	0.0206091	0.369424	0.624236	0.196981	0.349148	0.511724	0.543296	0.484797	0.0293089	0.0498148	0.0163101	0.0286557	0.0428021	0.0456443	0.0408444	2.66355e-05	4.5265e-05	1.48251e-05	2.66467e-05	3.87822e-05	4.14375e-05	3.65886e-05	0.00699739	0.0115454	0.00336635	0.00611345	0.00862095	0.00880908	0.00780919	0.000386942	0.000656136	0.000214876	0.000384785	0.000561273	0.000596361	0.000531959	0.000386942	0.000656136	0.000214876	0.000384785	0.000561273
EST	7.4	Road transport, gasoline evaporation	0	0	0	0	0	0	0	0	0	0	0	0	0	0	1.11731	0.91397	0.925911	0.908665	0.781634	0.594775	0.464138	0	0	0	0	0	0	0	0	0	0	0	0	0	0	0	0	0	0	0	0	0	0	0	0	0	0
EST	7.5	Road transport, wear	0	0	0	0	0	0	0	0	0	0	0	0	0	0	0	0	0	0	0	0	0	0	0	0	0	0	0	0	0	0	0	0	0	0	0	0.22769	0.236718	0.243319	0.261907	0.277135	0.273929	0.244189	0.122656	0.127578	0.131368	0.141463	0.149734
EST	8.1	Air transport (<1000m)	0.00028	0.00025	0.00026	0.00032	0.0003	0.00029	0.00023	0.106819	0.116971	0.156822	0.145529	0.156634	0.177679	0.1323	0.0105397	0.0115078	0.0150015	0.0130833	0.0128091	0.0154288	0.00961563	0	0	0	0	0	0	0	0.0459705	0.0610633	0.0803038	0.0771283	0.0917247	0.116801	0.0788	0.000412135	0.000528076	0.000699411	0.0006604	0.000803366	0.00099499	0.000642111	0.000412135	0.000528076	0.000699411	0.0006604	0.000803366
EST	8.2	Rail transport	0.00957	0.00844	0.00766	0.00927	0.00764	0.00561	0.00732	0.4815	0.4173	0.4494	0.4708	0.3959	0.2782	0.3745	0.20925	0.18135	0.1953	0.2046	0.17205	0.1209	0.16275	0.000315	0.000273	0.000294	0.000308	0.000259	0.000182	0.000245	2.358	2.0436	2.2008	2.3056	1.9388	1.3624	1.834	0.0648	0.05616	0.06048	0.06336	0.05328	0.03744	0.0504	0.06165	0.05343	0.05754	0.06028	0.05069
EST	8.3	Navigation, non-international	0	0	0	0	0	0	0	0.052229	0.0464258	0.0464258	0.0638354	0.0986547	0.116064	0.0464258	0.007	0.007	0.007	0.007	0.007	0.007	0.007	0	0	0	0	0	0	0	0.439233	0.389203	0.388	0.592334	1.02532	1.36567	0.626844	0.0213761	0.0190005	0.019	0.0308513	0.0578871	0.086069	0.0463553	0.020251	0.0180005	0.018	0.0292276	0.0548404
EST	8.4	Mobile machinery, agriculture	0	0	0	0	0	0	0	0.828595	0.753175	0.685569	0.653419	0.674832	0.689923	0.637962	0.254525	0.231098	0.210954	0.201061	0.207431	0.212294	0.196305	0.000604848	0.000549128	0.000501376	0.000477864	0.00049296	0.00050456	0.00046656	2.64948	2.40541	2.19621	2.09322	2.15936	2.21016	2.04371	0.131404	0.119299	0.108924	0.103816	0.107096	0.109616	0.10136	0.131404	0.119299	0.108924	0.103816	0.107096
EST	8.5	Mobile machinery, industry	0	0	0	0	0	0	0	0.324291	0.279542	0.279542	0.333152	0.343874	0.310938	0.26882	0.101478	0.0880276	0.0880276	0.104953	0.108338	0.098165	0.0846426	0.000239664	0.000208	0.000208	0.000248	0.000256	0.000232	0.0002	0.982411	0.852599	0.852599	1.01656	1.04935	0.950968	0.819807	0.062493	0.0542362	0.0542362	0.0646662	0.0667522	0.060494	0.0521502	0.062493	0.0542362	0.0542362	0.0646662	0.0667522
EST	8.6	Other mobile sources	0.00101	0.00148	0.00185	0.00168	0.00163	0.00168	0.00155	3.50971	3.12733	2.66914	2.79868	2.91147	2.97575	3.36157	0.767376	0.675294	0.52411	0.542758	0.558576	0.571693	0.735134	6.6149e-05	8.73475e-05	9.22915e-05	0.000100587	0.000100049	0.000106769	9.12513e-05	0.223641	0.316348	0.343543	0.375995	0.372293	0.399085	0.329065	0.0241083	0.0286134	0.0281152	0.0303463	0.0302963	0.0321323	0.0302795	0.0241083	0.0286134	0.0281152	0.0303463	0.0302963
EST	9.1	Landfills	29.4388	28.8636	26.6856	25.8107	24.5902	24.4829	22.2912	0	0	0	0	0	0	0.023947	0.02	0	0	0	0	0	0.023898	0	0	0	0	0	0	3.8e-05	0	0	0	0	0	0	0	0	0	0	0	0	0.000139	0	0	0	0	0	0
EST	9.2	Controlled waste incineration	0	0	0	0	0	0	0	0.02	0	0	0	0	0.0026091	0.0132306	0	0.01	0.01	0	0	0.0004405	0.000973	0	0	0	0	0	0	0.000118	0	0	0	0	0	0.0064389	0.0156445	0	0	0	0	0	0	0	0	0	0	0	0
EST	9.3	Other waste treatment	1.74838	1.90075	2.22383	2.98608	3.41145	3.02022	2.89822	0	0	0	0	0	0.0008518	0.0063986	0.01	0.02	0.02	0.01	0.01	0.0111979	0.0179357	0	0	0	0	0	0.000172	0.0027891	0	0	0	0	0	0.0012958	0.0005081	0	0	0	0	0	0	0	0	0	0	0	0
EST	10.1	Livestock, Cattle	21.7788	21.9833	22.077	22.0576	21.5124	21.5454	21.2403	0	0	0	0	0	0	0	0	0	0	0	0	0	0	5.5784	5.51176	5.46366	5.3415	5.17125	5.08285	4.96312	0	0	0	0	0	0	0	0.09801	0.095072	0.0950953	0.0933917	0.0918861	0.0909501	0.0898174	0.049328	0.048123	0.047816	0.046756	0.04569
EST	10.2	Livestock, Poultry	0.16394	0.18579	0.1615	0.14306	0.13089	0.14953	0.1525	0	0	0	0	0	0	0	0	0	0	0	0	0	0	0.642943	0.705962	0.607909	0.524186	0.608632	0.554087	0.603579	0	0	0	0	0	0	0	0.0734214	0.084808	0.0698316	0.0654964	0.0594069	0.0714561	0.0700884	0.0096529	0.0111768	0.0091861	0.0086501	0.00774813
EST	10.3	Livestock, Sheep	0.25225	0.31777	0.40622	0.51351	0.59296	0.64046	0.62654	0	0	0	0	0	0	0	0	0	0	0	0	0	0	0.04802	0.0574	0.07336	0.0924	0.10696	0.11452	0.11256	0	0	0	0	0	0	0	0	0	0	0	0	0	0	0	0	0	0	0
EST	10.4	Livestock, Goats	0.01792	0.01485	0.01434	0.0169	0.02048	0.01843	0.01997	0	0	0	0	0	0	0	0	0	0	0	0	0	0	0	0	0	0	0	0	0	0	0	0	0	0	0	0	0	0	0	0	0	0	0	0	0	0	0	0
EST	10.5	Livestock, Pigs	1.39566	1.34182	1.3592	1.36314	1.54489	1.44852	1.44387	0	0	0	0	0	0	0	0	0	0	0	0	0	0	1.31997	1.26248	1.28162	1.33931	1.48464	1.32201	1.31062	0	0	0	0	0	0	0	0.076578	0.073426	0.075094	0.077542	0.089406	0.078228	0.077378	0.01215	0.011651	0.011919	0.012302	0.014205
EST	10.6	Livestock, Other animals	0.11252	0.09894	0.09312	0.09506	0.10282	0.10088	0.10476	0	0	0	0	0	0	0	0	0	0	0	0	0	0	0.08584	0.11548	0.11104	0.10252	0.10844	0.07844	0.07992	0	0	0	0	0	0	0	0.001044	0.000918	0.000864	0.000882	0.000954	0.000954	0.000972	0.000696	0.000612	0.000576	0.000588	0.000636
EST	10.7	Crops and pastures	0	0	0	0	0	0	0	0	0	0	0	0	0	0	0	0	0	0	0	0	0	1.95342	2.08597	1.68697	1.89924	2.09849	2.97822	2.29552	0	0	0	0	0	0	0	0.600524	0.630722	0.830418	0.867489	0.9679	0.745346	0.674	0.0230971	0.0242585	0.0319391	0.033365	0.0372269
EST	10.8	Agricultural waste burning	0.815	0.815	0.815	0.815	0.815	0.815	0.815	0.00555849	0.00634918	0.0078	0.00668678	0.00919616	0.00919616	0.00887542	1.0604	1.0602	1.06	1.0602	1.0604	1.0606	1.0608	0.1612	0.1606	0.16	0.1606	0.1612	0.1618	0.1624	0.1708	0.1704	0.17	0.1704	0.1708	0.1712	0.1716	0.890762	0.890761	0.89076	0.890761	0.890762	0.890764	0.890765	0.790393	0.790392	0.79039	0.790392	0.790393
EST	10.9	Rice cultivation	0	0	0	0	0	0	0	0	0	0	0	0	0	0	0	0	0	0	0	0	0	0	0	0	0	0	0	0	0	0	0	0	0	0	0	0	0	0	0	0	0	0	0	0	0	0	0
EST	10.10	Storage and handling of agricultural products	0	0	0	0	0	0	0	0	0	0	0	0	0	0	0	0	0	0	0	0	0	0	0	0	0	0	0	0	0	0	0	0	0	0	0	0	0	0	0	0	0	0	0	0	0	0	0
EST	10.11	Other agriculture	0	0	0	0	0	0	0	0	0	0	0	0	0	0	0	0	0	0	0	0	0	0	0	0	0	0	0	0	0	0	0	0	0	0	0	0	0	0	0	0	0	0	0	0	0	0	0
HRV	1.1	Power plants	2.6872	2.6936	2.7	2.752	2.804	2.8572	2.9096	0.972893	0.857034	0.505971	0.958482	1.45031	0.911128	0.567	0.25294	0.214551	0.197916	0.205125	0.24337	0.230927	0.198829	0.0106128	0.0103313	0.00969989	0.00968251	0.011314	0.0111418	0.0084728	9.93259	7.50525	8.12194	7.50843	9.30883	8.26036	7.45454	0.689268	0.334701	0.398299	0.445839	0.761899	0.512776	0.613605	0.416693	0.206577	0.212215	0.298835	0.433718
HRV	1.2	Refineries	0.9844	0.9666	0.95	1.0052	1.0616	1.1174	1.1732	48.8365	52.9833	54.724	44.7184	53.7898	41.7545	52.2147	1.83217	1.94307	1.93921	1.72968	1.95408	1.56902	1.87115	0.199967	0.217011	0.224249	0.183154	0.220382	0.171627	0.214124	3.6349	3.70425	3.58362	3.32222	3.72417	1.54642	3.49815	1.44589	1.4929	1.48485	1.34755	1.53065	0.863543	1.41799	0.506586	0.503621	0.49255	0.469779	0.523034
HRV	2.1	Residential combustion (including commercial/institutional)	16.0382	16.9078	17.781	18.364	18.9482	19.533	20.117	126.193	122.648	117.875	117.848	99.9647	103.501	110.32	6.83124	6.63023	6.35483	6.36997	5.40465	5.59702	5.97395	0.125438	0.122528	0.117229	0.117787	0.100528	0.104102	0.111226	3.88395	3.80734	3.7822	3.58131	3.16122	3.27182	3.45046	4.08559	3.93551	3.75841	3.74867	3.16364	3.25365	3.49238	3.8217	3.70156	3.52865	3.52538	2.98359
HRV	2.2	Agricultural stationary combustion	0	0	0	0	0	0	0	0.0785779	0.0607976	0.0665254	0.0607378	0.0338487	0.066969	0.0624944	0.0086806	0.00730778	0.00824986	0.00722688	0.00269133	0.0079474	0.00745679	0.000114857	0.00010812	0.000127625	0.000105704	9.18211e-06	0.000116289	0.000109485	0.113154	0.0918965	0.0978793	0.0914697	0.0663736	0.0986878	0.0938572	0.0145271	0.0122761	0.0125198	0.0121392	0.0120965	0.0127673	0.0124256	0.0126382	0.0104274	0.0106308	0.0103307	0.010288
HRV	34.1	Iron and steel industry (including coke ovens)	0	0	0	0	0	0	0	0.157391	0.237253	0.232854	0.240206	0.252627	0.319598	0.266244	0.0202154	0.0236013	0.0280358	0.0259328	0.0299409	0.0246679	0.0240737	0.000632377	0.000698841	0.000897399	0.000808398	0.00097104	0.00065943	0.00071196	0.452922	0.494129	0.6221	0.55616	0.657273	0.457672	0.488104	0.00306984	0.00341196	0.00282815	0.00246613	0.00183005	0.00333276	0.00248558	0.0029397	0.00315363	0.00262145	0.00222459	0.00160129
HRV	34.2	Non-ferrous metal industry	0	0	0	0	0	0	0	0	0	0	0	0	0	0	0	0	0	0	0	0	0	0	0	0	0	0	0	0	0	0	0	0	0	0	0	0	0	0	0	0	0	0	0	0	0	0	0
HRV	34.3	Chemical industry	2.088	2.034	1.98	1.9418	1.9036	1.8666	1.8288	28.4527	17.7818	17.2433	39.1128	34.8726	9.04094	0.0548493	0.883112	0.938294	1.02968	0.778447	0.859809	0.604328	0.728515	3.4027	4.36649	3.5499	2.37043	2.49353	1.98798	1.41674	2.38248	2.72711	2.34168	2.28257	2.45073	2.4173	1.36478	0.00531144	0.0126677	0.0158016	0.0189446	0.0188703	0.0192744	0.00781799	0.00398358	0.00950076	0.0118512	0.0142085	0.0135933
HRV	34.4	Paper and pulp industry	0.0312	0.0306	0.03	0.0384	0.0468	0.0564	0.0652	0	0	0	0	0	0	0	0.0052526	0.0066065	0.0055489	0.0063331	0.0049554	0.0052122	0.0036946	0	0	0	0	0	0	0	0.026263	0.0330325	0.0277445	0.0316655	0.024777	0.026061	0.018473	0	0	0	0	0	0	0	0	0	0	0	0
HRV	34.5	Cement industry	0	0	0	0	0	0	0	2.21382	2.18613	2.17743	2.25536	2.67034	3.184	1.9904	0.184485	0.182177	0.181453	0.187946	0.186867	0.184149	0.14285	0.184485	0.182177	0.181453	0.187946	0.186867	0.189036	0.1464	0	0	6.45152	7.16887	7.5632	6.74485	5.57139	1.38571	1.36664	1.35894	1.40825	1.1179	1.45716	0.624402	0.692038	0.682422	0.678464	0.703172	0.560778
HRV	34.6	Other non-metallic minerals industry	0	0	0	0	0	0	0	0.221055	0.238244	0.2505	0.306164	0.314849	0.310768	0.190866	0.0115182	0.013627	0.0123402	0.0115449	0.0114543	0.0137586	0.0110987	0	0	0	0	0	0	0	0	0	0	0	0	0	0	2.89704	3.38286	3.1163	2.93873	2.96792	3.4713	2.86659	1.73681	2.05312	1.85103	1.71389	1.70427
HRV	34.7	Storage and handling in industry	0	0	0	0	0	0	0	0	0	0	0	0	0	0	0	0	0	0	0.000707	0.000517	0.02134	0	0	0	0	0.006453	0.001639	0.056115	0	0	0	0	0	0	0	0.0504827	0.0568766	0.0615087	0.0617417	0.0663899	0.0659552	0.0787594	0.0448735	0.050557	0.0546744	0.0548815	0.0589854
HRV	34.8	Other industries	1.1952	1.2068	1.22	1.2854	1.352	1.4204	1.4872	22.1039	24.55	20.8575	20.5891	21.4448	22.3292	22.4413	6.97066	7.54186	8.41354	8.11644	6.16337	5.83869	5.22858	0.0277464	0.0322633	0.0259919	0.0273673	0.0261906	0.024352	0.0226253	4.89065	6.99952	4.29587	4.74048	7.70398	7.79439	6.84019	1.46487	1.80933	2.04972	1.62177	1.94322	1.78092	1.58627	1.24391	1.44615	1.62544	1.25168	1.52114
HRV	5.1	Coal production	0.6248	0.6218	0.62	0.6236	0.6284	0.6338	0.6384	0	0	0	0	0	0	0	0	0	0	0	0	0	0	0	0	0	0	0	0	0	0	0	0	0	0	0	0	0	0	0	0	0	0	0	0	0	0	0	0
HRV	5.2	Oil production	19.296	18.983	18.67	19.9158	21.1616	22.4074	23.6532	0	0	0	0	0	0	0	0.0999495	0.095095	0.08987	0.087153	0.0835145	0.079363	0.073739	0	0	0	0	0	0	0	0	0	0	0	0	0	0	0	0	0	0	0	0	0	0	0	0	0	0
HRV	5.3	Gas production	9.1476	9.3538	9.56	10.363	11.166	11.969	12.772	0	0	0	0	0	0	0	3.7759	2.85881	2.3995	2.55537	2.06041	1.9902	2.06354	0	0	0	0	0	0	0	0	0	0	0	0	0	0	0	0	0	0	0	0	0	0	0	0	0	0
HRV	5.4	Gasoline distribution	0	0	0	0	0	0	0	0	0	0	0	0	0	0	4.20245	4.20739	4.08723	4.02944	4.21147	3.86462	4.00701	0	0	0	0	0	0	0	0	0	0	0	0	0	0	0	0	0	0	0	0	0	0	0	0	0	0
HRV	5.5	Flaring	0	0	0	0	0	0	0	0.0011479	0.00203466	0.00197931	0.00216579	0.00217083	0.00216251	0.0021697	0.00011934	0.000208215	0.000202489	0.000220989	0.00022183	0.000220279	0.000221481	0	0	0	0	0	0	0	0.0132656	0.0238845	0.0232417	0.0254961	0.0255188	0.0254993	0.0255317	0	0	0	0	0	0	0	0	0	0	0	0
HRV	6.1	Solvent and other product use	0	0	0	0	0	0	0	0	0	0	0	0	0	0	41.0666	49.415	57.5621	67.0887	74.9382	71.5644	42.1492	0	0	0	0	0	0	0	0	0	0	0	0	0	0	0	0	0	0	0	0	0	0	0	0	0	0
HRV	7.1	Road transport, light duty vehicles	1.3124	1.1612	1.01	0.9606	0.9112	0.8618	0.8124	119.628	109.701	103.483	88.6034	81.3349	71.0292	63.7655	13.9229	12.8049	12.1254	10.4624	9.63946	8.35024	7.43292	0.381177	0.384886	0.409632	0.441797	0.482568	0.471992	0.487052	22.8253	22.0972	22.2444	21.0439	21.3952	19.3653	18.1874	2.02952	2.13375	2.43956	2.04205	2.06404	1.69531	1.58	2.02952	2.13375	2.43956	2.04205	2.06404
HRV	7.2	Road transport, heavy duty vehicles	0.3308	0.3654	0.4	0.4372	0.4756	0.5134	0.5512	3.25949	3.59825	3.07805	3.2808	3.04434	3.09091	2.48819	1.23467	1.30685	1.07017	1.17401	1.06934	1.12612	0.866086	0.00333604	0.00347277	0.00300187	0.0035623	0.00361031	0.00418919	0.0035495	11.4413	12.188	10.3692	11.3476	10.8515	11.7738	9.69106	0.609816	0.645804	0.542251	0.538403	0.489999	0.497957	0.377993	0.609816	0.645804	0.542251	0.538403	0.489999
HRV	7.3	Road transport, mopeds and motorcycles	0.2856	0.3528	0.42	0.4268	0.4336	0.4404	0.4472	7.05704	7.30509	3.52479	5.42769	4.97716	4.87569	4.392	3.69346	3.94384	2.07291	3.14908	2.91166	2.82335	2.52516	0.000671127	0.000706046	0.000355178	0.000599501	0.000577811	0.00060409	0.000569559	0.0829836	0.0980548	0.0548167	0.0939146	0.0958946	0.101482	0.0999364	0.0632921	0.0659671	0.0342972	0.0544773	0.050807	0.0516643	0.0469362	0.0632921	0.0659671	0.0342972	0.0544773	0.050807
HRV	7.4	Road transport, gasoline evaporation	0	0	0	0	0	0	0	0	0	0	0	0	0	0	5.01631	4.01344	3.46028	3.21525	2.99163	2.62359	2.23682	0	0	0	0	0	0	0	0	0	0	0	0	0	0	0	0	0	0	0	0	0	0	0	0	0	0
HRV	7.5	Road transport, wear	0	0	0	0	0	0	0	0	0	0	0	0	0	0	0	0	0	0	0	0	0	0	0	0	0	0	0	0	0	0	0	0	0	0	0	0.544107	0.5622	0.566266	0.617608	0.660674	0.687767	0.641157	0.285561	0.294885	0.298671	0.324965	0.348232
HRV	8.1	Air transport (<1000m)	0	0	0	0	0	0	0	0.499373	1.46255	12.3863	1.54193	1.55625	1.51087	1.44234	0.154365	0.207014	1.47046	0.246705	0.253862	0.278835	0.244566	9.98816e-07	0	0.00080915	5.49349e-06	5.49349e-06	4.99408e-06	4.99408e-06	0.88686	1.02572	6.56114	1.26387	1.30682	1.47632	1.27071	0	0	0	0	0	0	0	0	0	0	0	0
HRV	8.2	Rail transport	0.002	0.001	0	0.001	0.002	0.003	0.004	0.30067	0.31458	0.32635	0.34561	0.34882	0.34561	0.30495	0.130665	0.13671	0.141825	0.150195	0.15159	0.150195	0.132525	0.000196825	0.000205931	0.000213635	0.000226243	0.000228345	0.000226243	0.000199627	1.11276	1.16424	1.2078	1.27908	1.29096	1.27908	1.1286	0	0	0	0	0	0	0	0	0	0	0	0
HRV	8.3	Navigation, non-international	0	0	0	0	0	0	0	0.35397	0.346339	0.346641	0.346787	0.346932	0.348568	0.34823	0.215633	0.214698	0.215	0.215145	0.215291	0.216118	0.216589	0	0	0	0	0	0	0	1.39298	1.38006	1.386	1.38886	1.39172	1.40781	1.41725	0.111	0.111	0.111	0.111	0.111	0.111	0.111	0.105	0.105	0.105	0.105	0.105
HRV	8.4	Mobile machinery, agriculture	0.022	0.021	0.02	0.021	0.022	0.023	0.024	3.024	2.9296	2.928	3.024	3.0432	3.2032	3.0784	1.3797	1.33663	1.3359	1.3797	1.38846	1.46146	1.40452	0.00132384	0.00128251	0.00128181	0.00132384	0.00133224	0.00140229	0.00134765	9.5067	9.20993	9.2049	9.5067	9.56706	10.0701	9.67772	0	0	0	0	0	0	0	0	0	0	0	0
HRV	8.5	Mobile machinery, industry	0.0108	0.0104	0.01	0.0104	0.0108	0.0112	0.0116	15.002	16.7019	1.21236	12.8859	13.4922	14.1817	12.27	1.31267	1.41953	0.0819215	1.44142	1.53567	1.66787	1.34279	0.000665339	0.000696049	5.49349e-06	0.000906408	0.00097725	0.00108452	0.000831363	4.52039	4.70979	0.275162	6.30248	6.80272	7.56452	5.77206	0	0	0	0	0	0	0	0	0	0	0	0
HRV	8.6	Other mobile sources	0.0036	0.0012	0	0.0012	0.0036	0.0054	0.0072	12.093	10.7494	12.093	12.5409	12.5409	13.2874	12.6902	0.593365	0.527436	0.593365	0.615342	0.615342	0.651969	0.622667	4.0452e-05	3.59574e-05	4.0452e-05	4.19503e-05	4.19503e-05	4.44473e-05	4.24497e-05	0.0612715	0.0544635	0.0612715	0.0635408	0.0635408	0.067323	0.0642972	0	0	0	0	0	0	0	0	0	0	0	0
HRV	9.1	Landfills	36.8552	34.5326	32.21	33.0708	33.9316	34.7924	35.6532	0	0	0	0	0	0	0	0.0388833	0.0412224	0.043598	0.0490867	0.0545753	0.0545753	0.0550406	0	0	0	0	0	0	0	0	0	0	0	0	0	0	0	0	0	0	0	0	0	0	0	0	0	0
HRV	9.2	Controlled waste incineration	0	0	0	0	0	0	0	6.15072e-05	5.7536e-05	5.3151e-05	9.48888e-05	0.000100134	0.000301101	0.000104475	0.00296	0.000888	3.33e-05	0.00259	0.0002109	0.0002331	0.0007326	0	0	0	0	0	0	0	0.000388299	0.000163496	6.7461e-05	0.000389157	0.000178195	0.000422462	0.000315251	2.8e-06	8.4e-07	3.15e-08	2.45e-06	1.8525e-07	1.512e-06	4.752e-06	1.6e-06	4.8e-07	1.8e-08	1.4e-06	1.0545e-07
HRV	9.3	Other waste treatment	9.7992	10.1496	10.5	10.4376	10.3752	10.3128	10.2504	0.000476915	0.000478602	0.0005108	0.000505176	0.000557057	0.000549887	0.000570836	1.69037e-06	2.74118e-06	2.22396e-06	2.40996e-06	2.31519e-06	3.1281e-06	3.14217e-06	2.9888	3.0064	3.04086	3.06326	3.07442	3.12818	3.15152	0.00104643	0.00105013	0.00112078	0.00110844	0.00122228	0.00120654	0.00125251	0	0	0	0	0	0	0	0	0	0	0	0
HRV	10.1	Livestock, Cattle	32.754	33.277	33.8	34.6108	35.4216	36.2324	37.0432	0	0	0	0	0	0	0	0	0	0	0	0	0	0	8.06077	7.8025	7.99341	8.0593	7.79716	7.46485	7.40681	0	0	0	0	0	0	0	0.102677	0.104234	0.105931	0.107886	0.10436	0.100776	0.0996034	0.065929	0.0672266	0.0682713	0.0695947	0.0673196
HRV	10.2	Livestock, Poultry	0.1796	0.1648	0.15	0.151	0.152	0.153	0.154	0	0	0	0	0	0	0	0	0	0	0	0	0	0	5.67912	5.67284	5.42208	5.3677	5.41971	5.26997	4.19881	0	0	0	0	0	0	0	0.25788	0.24474	0.23344	0.22438	0.22531	0.22277	0.20067	0.02802	0.026578	0.025408	0.0247	0.024956
HRV	10.3	Livestock, Sheep	0	0	0	0	0	0	0	0	0	0	0	0	0	0	0	0	0	0	0	0	0	0.615973	0.757657	0.836304	0.713831	0.678292	0.675553	0.64995	0	0	0	0	0	0	0	0	0	0	0	0	0	0	0	0	0	0	0
HRV	10.4	Livestock, Goats	0	0	0	0	0	0	0	0	0	0	0	0	0	0	0	0	0	0	0	0	0	0.0903913	0.132363	0.141207	0.108021	0.0964971	0.0880709	0.0799249	0	0	0	0	0	0	0	0	0	0	0	0	0	0	0	0	0	0	0
HRV	10.5	Livestock, Pigs	9.0264	8.9832	8.94	8.959	8.978	8.997	9.016	0	0	0	0	0	0	0	0	0	0	0	0	0	0	9.87967	10.9943	9.02339	10.7012	9.71862	8.07397	8.99345	0	0	0	0	0	0	0	0.620062	0.686262	0.556187	0.683726	0.619539	0.508091	0.574179	0.0962755	0.106548	0.0863407	0.106181	0.0962104
HRV	10.6	Livestock, Other animals	4.3304	4.6502	4.97	5.2232	5.4764	5.7296	5.9828	0	0	0	0	0	0	0	0	0	0	0	0	0	0	0.144533	0.158441	0.146365	0.1776	0.199978	0.222	0.231479	0	0	0	0	0	0	0	0.00182294	0.00199836	0.00184604	0.00224	0.00252224	0.0028	0.00292	0.00117189	0.00128466	0.00118674	0.00144	0.00162144
HRV	10.7	Crops and pastures	0	0	0	0	0	0	0	0	0	0	0	0	0	0	0	0	0	0	0	0	0	9.55298	10.099	9.68914	8.74105	10.1009	10.3579	8.9455	0	0	0	0	0	0	0	0	0	0	0	0	0	0	0	0	0	0	0
HRV	10.8	Agricultural waste burning	2.6032	2.6016	2.6	2.6016	2.6032	2.6048	2.6064	0.0202839	0.0263445	0.024	0.0260187	0.0225271	0.0225271	0.0234121	3.3916	3.3908	3.39	3.3908	3.3916	3.3924	3.3932	0.5208	0.5204	0.52	0.5204	0.5208	0.5212	0.5216	0.0816	0.0808	0.08	0.0808	0.0816	0.0824	0.0832	2.84852	2.84852	2.84852	2.84852	2.84852	2.84852	2.84852	2.52756	2.52756	2.52756	2.52756	2.52756
HRV	10.9	Rice cultivation	0	0	0	0	0	0	0	0	0	0	0	0	0	0	0	0	0	0	0	0	0	0	0	0	0	0	0	0	0	0	0	0	0	0	0	0	0	0	0	0	0	0	0	0	0	0	0
HRV	10.10	Storage and handling of agricultural products	0	0	0	0	0	0	0	0	0	0	0	0	0	0	0	0	0	0	0	0	0	0	0	0	0	0	0	0	0	0	0	0	0	0	0	0	0	0	0	0	0	0	0	0	0	0	0
HRV	10.11	Other agriculture	0	0	0	0	0	0	0	0	0	0	0	0	0	0	0	0	0	0	0	0	0	0	0	0	0	0	0	0	0	0	0	0	0	0	0	0	0	0	0	0	0	0	0	0	0	0	0
HUN	1.1	Power plants	0.43751	0.59859	1.04401	0.77539	0.94959	1.10183	1.15928	3.27075	3.56566	4.16235	4.04766	4.33983	4.29986	4.62215	2.2148	2.1774	2.14	2.1914	2.244	2.296	2.348	0.0748	0.0824	0.09	0.1016	0.1132	0.126	0.138	36.9904	35.4752	33.96	31.7144	29.4688	27.2232	24.9776	7.33338	5.29716	3.26093	3.20703	3.15252	3.09801	3.0435	4.27519	3.09466	1.91412	1.90478	1.89699
HUN	1.2	Refineries	0.03315	0.02795	0.0449	0.0477	0.05365	0.05075	0.04652	2.13371	2.16759	2.16005	2.17102	2.04844	2.02056	2.10741	7.5836	7.761	7.94	7.9948	8.0512	8.1068	8.1624	0	0	0	0	0.0024	0.0036	0.0048	3.1988	3.2744	3.35	3.4772	3.6044	3.7328	3.8604	0.158861	0.167336	0.17581	0.181935	0.189202	0.195493	0.201784	0.120721	0.1277	0.13381	0.138205	0.1426
HUN	2.1	Residential combustion (including commercial/institutional)	10.153	9.34738	10.5817	11.6407	6.12286	6.72122	7.31866	190.911	160.285	137.652	110.177	77.7809	54.2634	101.074	28.9959	29.0141	29.0323	29.0063	28.9803	28.9543	28.9283	0.279304	0.279904	0.282904	0.283504	0.284104	0.285904	0.286904	17.1859	17.6855	18.1851	18.1261	18.0687	18.0105	17.9523	11.6444	11.3594	11.0757	11.0237	10.9718	10.9198	10.8679	10.6466	10.5414	10.4361	10.3938	10.3516
HUN	2.2	Agricultural stationary combustion	0.82129	0.58631	0.57185	0.54772	0.51643	0.57708	0.53831	0	0	0	0	0	0	0	0	0	0	0	0	0	0	0	0	0	0	0	0	0	0	0	0	0	0	0	0	0	0	0	0	0	0	0	0	0	0	0	0
HUN	34.1	Iron and steel industry (including coke ovens)	0.25257	0.27021	0.26551	0.29363	0.31077	0.29692	0.24285	43.2168	44.3565	43.9614	45.9204	43.7099	43.3929	43.3491	0	0	0	0	0	0	0	0	0	0	0	0	0	0	0.6592	0.6296	0.6	0.6038	0.6076	0.6114	0.6152	8.41964	5.61935	2.81905	2.46883	2.11861	1.76839	1.41817	6.63267	4.29441	1.95615	1.70504	1.45392
HUN	34.2	Non-ferrous metal industry	0	0	0	0	0	0	0	0.0819254	0.0849306	0.084748	0.0902331	0.0870112	0.0866924	0.0848431	0	0	0	0	0	0	0	0	0	0	0	0	0	0	0	0	0	0	0	0	0	0.0896392	0.0894246	0.08921	0.0895896	0.0899692	0.0903488	0.0907284	0.0672596	0.0670598	0.06686	0.0671152	0.0673704
HUN	34.3	Chemical industry	1.32431	1.3032	1.56002	1.53064	1.59145	1.45586	1.27437	0.241806	0.250677	0.250138	0.266327	0.256818	0.255877	0.250418	2.5308	2.4604	2.39	2.3724	2.3548	2.3384	2.3212	0.906	0.918	0.93	0.9308	0.9316	0.9336	0.9348	2.4196	2.2198	2.02	1.9828	1.9456	1.9084	1.8712	0.77927	0.82259	0.86591	0.911411	0.956912	1.00241	1.04791	0.650348	0.686794	0.72324	0.761594	0.799949
HUN	34.4	Paper and pulp industry	0.0174	0.01722	0.01894	0.01748	0.01715	0.01236	0.00842	0.319474	0.331193	0.330481	0.35187	0.339306	0.338063	0.330852	0.006	0.008	0.01	0.0098	0.0108	0.0112	0.0116	0	0	0	0	0	0	0	0.2012	0.2056	0.21	0.2054	0.2008	0.1962	0.1916	0.0080372	0.0094236	0.01081	0.009186	0.007562	0.005938	0.0034488	0.0068368	0.0082034	0.00957	0.0081286	0.0066872
HUN	34.5	Cement industry	0	0	0	0	0	0	0	0	0	0	0	0	0	0	0	0	0	0	0	0	0	0	0	0	0	0	0	0	4.5656	4.1328	3.7	3.686	3.672	3.658	3.644	1.27292	1.00021	0.72751	0.707657	0.687804	0.66795	0.648097	0.986245	0.792238	0.59823	0.583741	0.569251
HUN	34.6	Other non-metallic minerals industry	0	0	0	0	0	0	0	2.6751	2.77323	2.76727	2.94637	2.84117	2.83076	2.77038	0	0	0	0	0	0	0	0	0	0	0	0	0	0	4.7132	4.4016	4.09	3.8466	3.6032	3.3598	3.1164	0.149404	0.121107	0.09281	0.0916358	0.0904616	0.0892874	0.0881132	0.0854556	0.0803078	0.07516	0.0746716	0.0741832
HUN	34.7	Storage and handling in industry	0	0	0	0	0	0	0	0	0	0	0	0	0	0	0	0	0	0	0	0	0	0	0	0	0	0	0	0	0	0	0	0	0	0	0	0.935854	0.996587	1.05732	1.05434	1.05135	1.04837	1.04539	0.100338	0.107514	0.11469	0.114418	0.114146
HUN	34.8	Other industries	0.30304	0.31096	0.34305	0.34396	0.34965	0.3704	0.28291	3.0769	3.18977	3.18291	3.38891	3.26791	3.25593	3.18648	1.2456	1.2278	1.21	1.2138	1.2188	1.2256	1.2308	0.002	0.001	0	0	0.0028	0.0054	0.0072	5.6748	5.5218	5.37	5.2766	5.1832	5.0898	4.9964	3.26952	3.13344	2.99969	2.96735	2.93501	2.90267	2.87033	1.2805	1.20648	1.13202	1.10419	1.07636
HUN	5.1	Coal production	12.6078	5.5829	1.0436	1.01783	1.00481	0.93421	0.65731	0	0	0	0	0	0	0	0	0	0	0	0	0	0	0	0	0	0	0	0	0	0	0	0	0	0	0	0	0.258815	0.201162	0.14351	0.143056	0.142602	0.142148	0.141694	0.0290068	0.0242834	0.01956	0.0194998	0.0194396
HUN	5.2	Oil production	107.658	101.537	96.9699	97.4131	97.6382	95.7059	97.4763	0	0	0	0	0	0	0	0.4492	0.4546	0.46	0.468	0.476	0.484	0.492	0	0	0	0	0	0	0	0	0	0	0	0	0	0	0	0	0	0	0	0	0	0	0	0	0	0
HUN	5.3	Gas production	13.0715	12.6547	12.4172	12.7495	13.0728	13.1209	13.6973	0	0	0	0	0	0	0	1.14	1.11	1.08	1.0524	1.0248	0.9972	0.9696	0	0	0	0	0	0	0	0	0	0	0	0	0	0	0	0	0	0	0	0	0	0	0	0	0	0
HUN	5.4	Gasoline distribution	0	0	0	0	0	0	0	0	0	0	0	0	0	0	3.9808	3.6354	3.29	3.0508	2.8116	2.5724	2.3332	0	0	0	0	0	0	0	0	0	0	0	0	0	0	0	0	0	0	0	0	0	0	0	0	0	0
HUN	5.5	Flaring	0	0	0	0	0	0	0	0.738919	0.795757	0.8526	0.909438	0.966276	1.02312	1.07996	0	0	0	0	0	0	0	0	0	0	0	0	0	0	0.0436	0.0418	0.04	0.0414	0.0428	0.0442	0.0456	0.0624616	0.0624608	0.06246	0.0619124	0.0613648	0.0608172	0.0602696	0.0624616	0.0624608	0.06246	0.0619124	0.0613648
HUN	6.1	Solvent and other product use	0	0	0	0	0	0	0	0	0	0	0	0	0	0	39.9316	39.425	38.92	37.7352	36.5504	35.3668	34.1824	0	0	0	0	0	0	0	0	0	0	0	0	0	0	0	0	0	0	0	0	0	0	0	0	0	0
HUN	7.1	Road transport, light duty vehicles	0.950121	0.881596	0.939935	0.948092	0.899622	0.773868	0.731351	191.745	161.18	135.589	114.422	100.22	85.0432	52.2535	22.8668	21.1226	19.38	18.3684	17.3568	16.3452	15.3336	1.4216	1.5408	1.66	1.6016	1.5444	1.4878	1.4304	29.862	28.6702	27.48	26.937	26.394	25.851	25.308	1.35124	1.33407	1.31794	1.33985	1.36168	1.38351	1.40436	1.35107	1.33398	1.31786	1.33977	1.36063
HUN	7.2	Road transport, heavy duty vehicles	0.195716	0.203676	0.244072	0.240478	0.222026	0.185545	0.168969	19.1446	16.0928	13.5377	11.4243	10.0063	8.49102	5.21717	4.5064	4.5732	4.64	4.1952	3.7504	3.3056	2.8608	0.0168	0.0184	0.02	0.0216	0.0232	0.026	0.028	54.0144	57.1022	60.19	57.7716	55.3544	52.9366	50.5188	1.95593	1.99666	2.03739	1.86176	1.68613	1.51051	1.33488	1.95593	1.99666	2.03739	1.86176	1.68613
HUN	7.3	Road transport, mopeds and motorcycles	0.138984	0.139238	0.160983	0.16771	0.164882	0.147498	0.14559	87.3783	73.4497	61.7877	52.1419	45.6701	38.7542	23.8119	15.8136	16.1968	16.58	15.9608	15.3416	14.7224	14.1032	0	0	0	0	0	0.0024	0.0032	0.0824	0.0862	0.09	0.152	0.214	0.276	0.338	0.25994	0.271795	0.28365	0.275634	0.267618	0.259602	0.251586	0.25994	0.271795	0.28365	0.275537	0.267424
HUN	7.4	Road transport, gasoline evaporation	0	0	0	0	0	0	0	0	0	0	0	0	0	0	14.972	13.2204	11.47	10.5636	9.6572	8.7508	7.8444	0	0	0	0	0	0	0	0	0	0	0	0	0	0	0	0	0	0	0	0	0	0	0	0	0	0
HUN	7.5	Road transport, wear	0	0	0	0	0	0	0	0	0	0	0	0	0	0	0	0	0	0	0	0	0	0	0	0	0	0	0	0	0	0	0	0	0	0	0	1.3858	1.48136	1.57691	1.64862	1.72034	1.79205	1.86377	0.479688	0.516479	0.55327	0.582106	0.610942
HUN	8.1	Air transport (<1000m)	0	0	0	4e-05	0	0	0	1.71464	0.262897	0.156063	0.0240409	0.0234911	0.0238034	0.191029	0.1188	0.1194	0.12	0.1236	0.1272	0.1308	0.1344	0	0	0	0	0	0	0	0.3648	0.3674	0.37	0.3802	0.3904	0.4006	0.4108	0.00365	0.003685	0.00372	0.0038116	0.0039032	0.0039948	0.0040864	0.0033564	0.0033882	0.00342	0.0035048	0.0035896
HUN	8.2	Rail transport	0.01461	0.0141	0.01246	0.01264	0.01266	0.01281	0.01806	6.89424	1.05706	0.6275	0.0966638	0.0944532	0.0957089	0.768091	0.4624	0.4262	0.39	0.3884	0.3868	0.3852	0.3836	0	0	0	0	0	0	0	3.1992	2.9646	2.73	2.7106	2.6912	2.6718	2.6524	0.280018	0.259099	0.23818	0.235339	0.232497	0.229656	0.226814	0.265284	0.245467	0.22565	0.222957	0.220264
HUN	8.3	Navigation, non-international	0	0	0	0	0	0	0	0.0633	0.0633	0.0633	0.0633	0.0633	0.0633	0.0633	0.0633	0.0633	0.0633	0.0633	0.0633	0.0633	0.0633	0	0	0	0	0	0	0	1.245	1.245	1.245	1.245	1.245	1.245	1.245	0.0844	0.0844	0.0844	0.0844	0.0844	0.0844	0.0844	0.08018	0.08018	0.08018	0.08018	0.08018
HUN	8.4	Mobile machinery, agriculture	0	0	0	0	0	0	0	27.4671	4.21139	2.5	0.385115	0.376308	0.381311	3.06012	1.7336	1.6568	1.58	1.5724	1.5648	1.5572	1.5496	0.0012	0	0	0	0.0012	0.0018	0.0024	11.8212	11.2956	10.77	10.6658	10.5616	10.4574	10.3532	1.12543	1.06898	1.01254	0.999742	0.986944	0.974146	0.961348	1.06619	1.01272	0.95925	0.947125	0.935
HUN	8.5	Mobile machinery, industry	0	0	0	0	0	0	0	0.219737	0.0336911	0.02	0.00308092	0.00301046	0.00305048	0.024481	0.022	0.021	0.02	0.0224	0.0248	0.0272	0.0296	0	0	0	0	0	0	0	0.1812	0.1856	0.19	0.1932	0.1964	0.1996	0.2028	0.0160188	0.0162694	0.01652	0.0166946	0.0168692	0.0170438	0.0172184	0.0151756	0.0154128	0.01565	0.0158154	0.0159808
HUN	8.6	Other mobile sources	0	0	0	0	0	0	0	18.6776	2.86375	1.7	0.261878	0.255889	0.259291	2.08088	2.0444	2.0822	2.12	2.112	2.104	2.096	2.088	0	0	0	0	0	0	0	0.0012	0	0	0	0.0012	0.0018	0.0024	0.0351048	0.0345324	0.03396	0.0326402	0.0313204	0.0300006	0.0286808	0.0322944	0.0317672	0.03124	0.0300264	0.0288128
HUN	9.1	Landfills	143.103	144.308	145.42	145.48	145.181	143.876	142.393	0	0	0	0	0	0	0	0	0	0	0	0	0	0	0	0	0	0	0	0	0	0	0	0	0	0	0	0	0	0	0	0	0	0	0	0	0	0	0	0
HUN	9.2	Controlled waste incineration	0	0.01955	0.01691	0.02489	0.02388	0.0232	0.04079	0	0	0	0	0	0	0	0	0	0	0	0	0	0	0	0	0	0	0	0	0	0	0	0	0	0	0	0	0	0	0	0	0	0	0	0	0	0	0	0
HUN	9.3	Other waste treatment	32.495	31.6566	30.8179	28.4821	26.4793	25.0778	22.6583	4.67999	5.03998	5.4	5.75999	6.11998	6.47999	6.83999	15.318	14.744	14.17	13.9708	13.7716	13.5724	13.3732	1.9548	1.9524	1.95	1.9472	1.9444	1.9416	1.9388	0.1216	0.1208	0.12	0.1208	0.1216	0.1224	0.1232	2.00865	2.00551	2.00237	2.0005	1.99862	1.99675	1.99488	1.91802	1.91488	1.91174	1.90987	1.90799
HUN	10.1	Livestock, Cattle	67.9981	65.3118	64.8442	63.063	63.5496	63.0401	62.653	0	0	0	0	0	0	0	0	0	0	0	0	0	0	16.6628	16.2764	15.89	15.787	15.684	15.581	15.478	0	0	0	0	0	0	0	0.164123	0.159857	0.15559	0.152169	0.148748	0.145326	0.141905	0.0364624	0.0355112	0.03456	0.0338028	0.0330456
HUN	10.2	Livestock, Poultry	9.57551	9.52197	8.60371	8.54434	8.3262	8.3668	7.99759	0	0	0	0	0	0	0	0	0	0	0	0	0	0	23.9852	24.8526	25.72	25.0358	24.3516	23.6674	22.9832	0	0	0	0	0	0	0	1.76423	1.85965	1.95507	1.95614	1.95721	1.95828	1.95934	0.392051	0.413255	0.43446	0.434697	0.434935
HUN	10.3	Livestock, Sheep	10.3787	11.3805	11.9289	11.1991	10.7236	10.468	10.3958	0	0	0	0	0	0	0	0	0	0	0	0	0	0	0	0	0	0	0	0	0	0	0	0	0	0	0	0	0	0	0	0	0	0	0	0	0	0	0	0
HUN	10.4	Livestock, Goats	0.48265	0.43234	0.39823	0.41528	0.36582	0.37435	0.33257	0	0	0	0	0	0	0	0	0	0	0	0	0	0	0	0	0	0	0	0	0	0	0	0	0	0	0	0	0	0	0	0	0	0	0	0	0	0	0	0
HUN	10.5	Livestock, Pigs	62.4461	54.2301	49.7367	48.7721	49.9284	45.299	40.1686	0	0	0	0	0	0	0	0	0	0	0	0	0	0	14.6232	13.9466	13.27	12.7996	12.3292	11.8588	11.3884	0	0	0	0	0	0	0	1.85762	1.77177	1.68592	1.6572	1.62847	1.59975	1.57102	0.330244	0.314982	0.29972	0.294613	0.289506
HUN	10.6	Livestock, Other animals	1.24367	1.28353	1.32715	1.28192	1.15644	1.14226	1.17915	0	0	0	0	0	0	0	0	0	0	0	0	0	0	2.4212	2.4756	2.53	2.5092	2.4884	2.4676	2.4468	0	0	0	0	0	0	0	0	0	0	0	0	0	0	0	0	0	0	0
HUN	10.7	Crops and pastures	0	0	0	0	0	0	0	0	0	0	0	0	0	0	0	0	0	0	0	0	0	0	0	0	0	0	0	0	0	0	0	0	0	0	0	0	0	0	0	0	0	0	0	0	0	0	0
HUN	10.8	Agricultural waste burning	1.9308	1.9244	1.918	1.9114	1.9048	1.8982	1.8916	10.699	19.121	18	16.0812	15.4106	15.4106	17.1383	2.5092	2.4996	2.49	2.4826	2.4752	2.4678	2.4604	0.384	0.382	0.38	0.3794	0.3788	0.3782	0.3776	0.4044	0.4022	0.4	0.3994	0.3988	0.3982	0.3976	2.1087	2.1016	2.0945	2.0874	2.0803	2.0732	2.0661	1.8711	1.8648	1.8585	1.8522	1.8459
HUN	10.9	Rice cultivation	0.512	0.5628	0.533	0.4824	0.5234	0.5068	0.5424	0	0	0	0	0	0	0	0	0	0	0	0	0	0	0	0	0	0	0	0	0	0	0	0	0	0	0	0	0	0	0	0	0	0	0	0	0	0	0	0
HUN	10.10	Storage and handling of agricultural products	0	0	0	0	0	0	0	0	0	0	0	0	0	0	0	0	0	0	0	0	0	0	0	0	0	0	0	0	0	0	0	0	0	0	0	0.393961	0.393961	0.39396	0.398041	0.402121	0.406202	0.410282	0.0695212	0.0695206	0.06952	0.0702406	0.0709612
HUN	10.11	Other agriculture	0	0	0	0	0	0	0	0	0	0	0	0	0	0	0	0	0	0	0	0	0	14.334	14.317	14.3	14.5252	14.7504	14.9756	15.2008	0	0	0	0	0	0	0	4.05559	4.05559	4.05559	4.05559	4.05559	4.05559	4.05559	0.901241	0.901241	0.90124	0.901241	0.901241
LTU	1.1	Power plants	0.23569	0.27371	0.2725	0.30078	0.29547	0.32935	0.38048	1.27287	1.40872	1.42659	1.41084	1.30001	1.25354	1.51956	0.338	0.3634	0.39	0.4118	0.4336	0.4554	0.4772	0.0292	0.0296	0.03	0.043	0.056	0.069	0.082	11.4084	11.2986	11.19	9.7356	8.2812	6.828	5.374	0.266183	0.257481	0.24997	0.205677	0.162049	0.120819	0.0787792	0.172758	0.167529	0.1623	0.134462	0.106624
LTU	1.2	Refineries	0.03788	0.04392	0.04726	0.04018	0.04138	0.05075	0.04651	2.15339	2.15987	2.16135	2.1617	2.18256	2.18041	2.61785	8.874	9.872	10.87	10.7538	10.6376	10.5214	10.4052	0.0016	0	0	0	0.0012	0.003	0.004	3.008	3.1728	3.34	3.2882	3.2364	3.1846	3.1328	0.14917	0.159395	0.17071	0.164553	0.158395	0.152695	0.147246	0.112851	0.121376	0.13023	0.126003	0.121776
LTU	2.1	Residential combustion (including commercial/institutional)	6.57602	6.39046	6.38941	6.52114	6.11829	6.12086	5.98148	100.63	96.9074	97.2657	96.226	93.0449	90.5749	87.5477	12.8853	12.8989	12.9125	12.9005	12.8885	12.8777	12.8661	0.17852	0.17792	0.17732	0.17672	0.17612	0.17672	0.17652	1.92605	1.93965	1.95325	1.94045	1.92765	1.91485	1.90205	6.92692	7.0048	7.08268	6.84648	6.61029	6.3741	6.138	5.91764	5.97651	6.0378	5.90064	5.76164
LTU	2.2	Agricultural stationary combustion	0.17473	0.1103	0.09635	0.10528	0.12798	0.13501	0.14783	0	0	0	0	0	0	0	0	0	0	0	0	0	0	0	0	0	0	0	0	0	0	0	0	0	0	0	0	0	0	0	0	0	0	0	0	0	0	0	0
LTU	34.1	Iron and steel industry (including coke ovens)	0.00082	0.0021	0.0026	0.00259	0.00173	0.00139	0.00114	0.0103124	0.0104406	0.00980028	0.0102046	0.00961823	0.00857098	0.0114596	0	0	0	0	0	0	0	0	0	0	0	0	0	0	0	0	0	0	0	0	0	0	0	0	0	0	0	0	0	0	0	0	0
LTU	34.2	Non-ferrous metal industry	0	0	0	0	0	0	0	0	0	0	0	0	0	0	0	0	0	0	0	0	0	0	0	0	0	0	0	0	0	0	0	0	0	0	0	0	0	0	0	0	0	0	0	0	0	0	0
LTU	34.3	Chemical industry	0.08401	0.09439	0.0885	0.11277	0.10965	0.12247	0.01737	0.0424839	0.043012	0.040374	0.0420397	0.039624	0.0353097	0.04721	0.33	0.325	0.32	0.3376	0.3552	0.3728	0.3904	6.0964	6.3632	6.63	7.106	7.582	8.058	8.534	1.3776	1.3638	1.35	1.4306	1.5112	1.5918	1.6724	0.739333	0.739332	0.73933	0.743881	0.748432	0.752984	0.757535	0.596742	0.596741	0.59674	0.600934	0.605128
LTU	34.4	Paper and pulp industry	0.0022	9e-05	0.00032	0.00022	0.00024	0.00297	0.00697	0.00134479	0.0013615	0.001278	0.00133073	0.00125426	0.00111769	0.00149439	0	0	0	0.0014	0.0028	0.0042	0.0056	0	0	0	0	0	0	0	0.0196	0.0098	0	0.0036	0.0072	0.0108	0.0144	0	0	0	0	0	0	0.0012344	0	0	0	0	0
LTU	34.5	Cement industry	0	0	0	0	0	0	0	0	0	0	0	0	0	0	0	0	0	0	0	0	0	0	0	0	0	0	0	0	0.9232	0.8966	0.87	0.8386	0.8072	0.7758	0.7444	0.193879	0.20785	0.22182	0.213454	0.205087	0.196721	0.188354	0.171068	0.183394	0.19572	0.188339	0.180957
LTU	34.6	Other non-metallic minerals industry	0	0	0	0	0	0	0	1.35582	1.37267	1.28849	1.34164	1.26455	1.12687	1.50665	0	0	0	0	0	0	0	0	0	0	0	0	0	0	0.3672	0.3686	0.37	0.3474	0.3248	0.3022	0.2796	0.0059496	0.0063248	0.0067	0.0064968	0.0062936	0.0060904	0.0058872	0.00483	0.005125	0.00542	0.0052644	0.0051088
LTU	34.7	Storage and handling in industry	0	0	0	0	0	0	0	0	0	0	0	0	0	0	0	0	0	0	0	0	0	0	0	0	0	0	0	0	0	0	0	0	0	0	0	0.473278	0.453714	0.43415	0.431109	0.428068	0.425028	0.421987	0.0540236	0.0518468	0.04967	0.049335	0.049
LTU	34.8	Other industries	0.21341	0.21882	0.22322	0.22481	0.22636	0.19878	0.13865	4.88072	4.94138	4.63832	4.82968	4.55216	4.05652	5.42367	0.1588	0.1838	0.21	0.1904	0.1736	0.1554	0.1372	0.0144	0.0172	0.02	0.0182	0.0164	0.0146	0.0128	1.1824	1.2506	1.32	1.1978	1.0768	0.9564	0.8352	0.62722	0.63459	0.64196	0.637506	0.633053	0.628599	0.624146	0.20733	0.209785	0.21224	0.204932	0.197624
LTU	5.1	Coal production	0	0	0	0	0	0	0	0	0	0	0	0	0	0	0	0	0	0	0	0	0	0	0	0	0	0	0	0	0	0	0	0	0	0	0	0.0012936	0.0014168	0.00154	0.0012856	0.0010312	0	0	0	0	0	0	0
LTU	5.2	Oil production	11.309	11.1551	11.6827	11.7607	11.71	11.9894	12.3716	0	0	0	0	0	0	0	0.1844	0.1772	0.17	0.167	0.164	0.161	0.158	0	0	0	0	0	0	0	0	0	0	0	0	0	0	0	0	0	0	0	0	0	0	0	0	0	0
LTU	5.3	Gas production	0.246571	0.261234	0.297971	0.348268	0.399035	0.468714	0.552993	0	0	0	0	0	0	0	0.3764	0.3632	0.35	0.3436	0.3372	0.3308	0.3244	0	0	0	0	0	0	0	0	0	0	0	0	0	0	0	0	0	0	0	0	0	0	0	0	0	0
LTU	5.4	Gasoline distribution	0	0	0	0	0	0	0	0	0	0	0	0	0	0	1.1512	1.0756	1	0.9414	0.884	0.8272	0.7696	0	0	0	0	0	0	0	0	0	0	0	0	0	0	0	0	0	0	0	0	0	0	0	0	0	0
LTU	5.5	Flaring	0	0	0	0	0	0	0	0.0584019	0.059651	0.0609	0.062149	0.0633981	0.0646471	0.0658962	0	0	0	0	0	0	0	0	0	0	0	0	0	0	0.002	0.001	0	0	0.0012	0.0018	0.0024	0.0052216	0.0048108	0.0044	0.004386	0.004372	0.004358	0.004344	0.0052216	0.0048108	0.0044	0.004386	0.004372
LTU	6.1	Solvent and other product use	0	0	0	0	0	0	0	0	0	0	0	0	0	0	17.378	17.384	17.39	17.1162	16.844	16.571	16.298	0	0	0	0	0	0	0	0	0	0	0	0	0	0	0	0	0	0	0	0	0	0	0	0	0	0
LTU	7.1	Road transport, light duty vehicles	0.434613	0.453268	0.462008	0.49046	0.570441	0.552839	0.468761	75.2995	72.9336	70.6121	70.3498	73.5464	82.6652	66.2137	12.6332	12.4066	12.18	11.4904	10.8008	10.1124	9.4232	0.0972	0.0978	0.1	0.1174	0.1364	0.1546	0.1728	16.5864	16.5782	16.57	15.7958	15.0216	14.2486	13.4748	0.502896	0.512378	0.52186	0.514239	0.506617	0.500173	0.492944	0.502232	0.511686	0.52114	0.51355	0.505959
LTU	7.2	Road transport, heavy duty vehicles	0.0553812	0.0603742	0.0660011	0.0700274	0.0827156	0.081877	0.0704514	3.96983	3.84509	3.7227	3.70887	3.8774	4.35815	3.49082	1.1728	1.2464	1.32	1.2628	1.2056	1.1484	1.0912	0.0016	0	0	0.0016	0.0032	0.0048	0.0064	14.9752	16.1076	17.24	16.5678	15.8956	15.2234	14.5512	0.520588	0.553974	0.58736	0.542179	0.496998	0.451818	0.406637	0.520179	0.553545	0.58691	0.54174	0.49657
LTU	7.3	Road transport, mopeds and motorcycles	0.0391562	0.0438981	0.0480008	0.0495022	0.055693	0.0519344	0.0420878	0.390993	0.378707	0.366653	0.365291	0.38189	0.429239	0.343815	2.388	2.589	2.79	2.3898	1.9896	1.5894	1.1892	0	0	0	0	0	0	0	0.0464	0.0482	0.05	0.072	0.094	0.116	0.138	0.0371268	0.0402334	0.04334	0.0366792	0.0300184	0.0233576	0.0166968	0.0353684	0.0383142	0.04126	0.0350152	0.0287704
LTU	7.4	Road transport, gasoline evaporation	0	0	0	0	0	0	0	0	0	0	0	0	0	0	6.4436	6.1918	5.94	5.3796	4.8192	4.2588	3.6984	0	0	0	0	0	0	0	0	0	0	0	0	0	0	0	0	0	0	0	0	0	0	0	0	0	0
LTU	7.5	Road transport, wear	0	0	0	0	0	0	0	0	0	0	0	0	0	0	0	0	0	0	0	0	0	0	0	0	0	0	0	0	0	0	0	0	0	0	0	0.407792	0.433526	0.45926	0.483177	0.507094	0.531012	0.554929	0.129386	0.138563	0.14774	0.15591	0.165214
LTU	8.1	Air transport (<1000m)	0.00046	0.00049	0.00042	0.00042	0.0005	0.00052	0.00039	1.05532	1.08309	1.07517	1.0734	1.07095	1.1161	1.13625	0.0184	0.0192	0.02	0.0232	0.0264	0.0296	0.0328	0	0	0	0	0	0	0	0.0096	0.0098	0.01	0.012	0.014	0.016	0.018	0	0	0	0	0	0	0	0	0	0	0	0
LTU	8.2	Rail transport	0.01556	0.01549	0.01567	0.01493	0.01551	0.01567	0.01201	0.763149	0.783226	0.7775	0.776217	0.774445	0.807101	0.821671	0.548	0.549	0.55	0.5516	0.5532	0.5548	0.5564	0	0	0	0	0	0	0	3.4728	3.4814	3.49	3.5034	3.5168	3.5302	3.5436	0.293864	0.294282	0.2947	0.294258	0.293817	0.293375	0.292934	0.278397	0.278794	0.27919	0.278772	0.278353
LTU	8.3	Navigation, non-international	0	0	0	0	0	0	0	0.183476	0.183476	0.183476	0.183476	0.183476	0.183476	0.183476	0.044432	0.043216	0.042	0.044736	0.047472	0.050208	0.052944	0	0	0	0	0	0	0	0.186122	0.190061	0.194	0.196626	0.199252	0.201878	0.204504	0.0171963	0.0175981	0.018	0.0181717	0.0183435	0.0185152	0.018687	0.0162386	0.0166193	0.017	0.0171642	0.0173284
LTU	8.4	Mobile machinery, agriculture	0	0	0	0	0	0	0	0.26747	0.274507	0.2725	0.27205	0.271429	0.282875	0.287981	0.196	0.193	0.19	0.1886	0.1872	0.1858	0.1844	0	0	0	0	0	0	0	1.2444	1.2272	1.21	1.1936	1.1772	1.1608	1.1444	0.114643	0.112502	0.11036	0.108466	0.106572	0.104679	0.102785	0.108608	0.106579	0.10455	0.102756	0.100962
LTU	8.5	Mobile machinery, industry	0	0	0	0	0	0	0	0.0333724	0.0342504	0.034	0.0339439	0.0338664	0.0352945	0.0359316	0.0564	0.0532	0.05	0.0538	0.0576	0.0614	0.0652	0	0	0	0	0	0	0	0.3708	0.3554	0.34	0.3556	0.3712	0.3868	0.4024	0.0315108	0.0298004	0.02809	0.02929	0.03049	0.03169	0.03289	0.0298572	0.0282386	0.02662	0.027755	0.02889
LTU	8.6	Other mobile sources	7e-05	0.0002	0.00025	0.00024	0.00032	0.00026	0.00023	0.667448	0.685008	0.68	0.678877	0.677328	0.705889	0.718632	0.7892	0.8046	0.82	0.805	0.79	0.775	0.76	0	0	0	0	0	0	0	0	0	0	0	0	0	0	0.0140396	0.0138098	0.01358	0.013053	0.012526	0.011999	0.011472	0.012914	0.012702	0.01249	0.0120058	0.0115216
LTU	9.1	Landfills	40.3462	39.6351	39.4211	39.4042	39.4902	39.3274	39.5385	0	0	0	0	0	0	0	0	0	0	0	0	0	0	0	0	0	0	0	0	0	0	0	0	0	0	0	0	0	0	0	0	0	0	0	0	0	0	0	0
LTU	9.2	Controlled waste incineration	0	0	0	0	0	0	0	0	0	0	0	0	0	0	0	0	0	0	0	0	0	0	0	0	0	0	0	0	0	0	0	0	0	0	0	0	0	0	0	0	0	0	0	0	0	0	0
LTU	9.3	Other waste treatment	21.2731	22.6662	21.5474	22.5731	23.6829	23.2346	22.6259	1.72616	1.76308	1.8	1.83692	1.87384	1.91075	1.94767	7.8712	7.9406	8.01	7.663	7.316	6.969	6.622	0.58	0.58	0.58	0.582	0.584	0.586	0.588	0.0324	0.0312	0.03	0.0312	0.0324	0.0336	0.0348	0.646479	0.64428	0.64208	0.63985	0.637621	0.635391	0.633162	0.620379	0.61818	0.61598	0.61375	0.611521
LTU	10.1	Livestock, Cattle	66.3037	65.0024	64.4527	66.9356	73.4593	74.2516	69.9295	0	0	0	0	0	0	0	0	0	0	0	0	0	0	15.1292	15.0746	15.02	14.9894	14.9588	14.9282	14.8976	0	0	0	0	0	0	0	0.189904	0.185587	0.18127	0.176694	0.172118	0.167543	0.162967	0.0421996	0.0412398	0.04028	0.0392636	0.0382472
LTU	10.2	Livestock, Poultry	0.6292	0.65671	0.73297	0.73631	0.77023	0.71039	0.72608	0	0	0	0	0	0	0	0	0	0	0	0	0	0	2.1628	2.2264	2.29	2.1622	2.0344	1.9066	1.7788	0	0	0	0	0	0	0	0.359446	0.378778	0.39811	0.387743	0.377376	0.367008	0.356641	0.0798716	0.0841658	0.08846	0.086158	0.083856
LTU	10.3	Livestock, Sheep	0.13841	0.181	0.23915	0.29975	0.4122	0.44006	0.44242	0	0	0	0	0	0	0	0	0	0	0	0	0	0	0	0	0	0	0	0	0	0	0	0	0	0	0	0	0	0	0	0	0	0	0	0	0	0	0	0
LTU	10.4	Livestock, Goats	0.13926	0.13773	0.11264	0.1065	0.10086	0.08499	0.07526	0	0	0	0	0	0	0	0	0	0	0	0	0	0	0	0	0	0	0	0	0	0	0	0	0	0	0	0	0	0	0	0	0	0	0	0	0	0	0	0
LTU	10.5	Livestock, Pigs	19.8553	20.1539	20.9312	21.1641	17.3353	15.693	15.2806	0	0	0	0	0	0	0	0	0	0	0	0	0	0	5.7808	5.9454	6.11	5.9896	5.8692	5.7488	5.6284	0	0	0	0	0	0	0	0.456491	0.47212	0.48775	0.484078	0.480406	0.476735	0.473063	0.0811532	0.0839316	0.08671	0.0860574	0.0854048
LTU	10.6	Livestock, Other animals	1.2332	1.2332	1.21381	1.18085	1.0839	1.05482	0.95011	0	0	0	0	0	0	0	0	0	0	0	0	0	0	0.6012	0.5856	0.57	0.57	0.57	0.57	0.57	0	0	0	0	0	0	0	0	0	0	0	0	0	0	0	0	0	0	0
LTU	10.7	Crops and pastures	0	0	0	0	0	0	0	0	0	0	0	0	0	0	0	0	0	0	0	0	0	0	0	0	0	0	0	0	0	0	0	0	0	0	0	0	0	0	0	0	0	0	0	0	0	0	0
LTU	10.8	Agricultural waste burning	2.968	2.968	2.968	2.968	2.968	2.968	2.968	25.772	27.7776	27.6	19.5912	28.804	28.804	27.1027	3.8612	3.8606	3.86	3.8606	3.8612	3.8618	3.8624	0.5916	0.5908	0.59	0.5908	0.5916	0.5924	0.5932	0.6224	0.6212	0.62	0.6212	0.6224	0.6236	0.6248	3.24235	3.24235	3.24235	3.24235	3.24235	3.24235	3.24236	2.87702	2.87702	2.87702	2.87702	2.87702
LTU	10.9	Rice cultivation	0	0	0	0	0	0	0	0	0	0	0	0	0	0	0	0	0	0	0	0	0	0	0	0	0	0	0	0	0	0	0	0	0	0	0	0	0	0	0	0	0	0	0	0	0	0	0
LTU	10.10	Storage and handling of agricultural products	0	0	0	0	0	0	0	0	0	0	0	0	0	0	0	0	0	0	0	0	0	0	0	0	0	0	0	0	0	0	0	0	0	0	0	0.07608	0.07608	0.07608	0.07608	0.07608	0.07608	0.07608	0.0134224	0.0134212	0.01342	0.0134212	0.0134224
LTU	10.11	Other agriculture	0	0	0	0	0	0	0	0	0	0	0	0	0	0	0	0	0	0	0	0	0	10.27	11.08	11.89	12.3612	12.8324	13.3036	13.7748	0	0	0	0	0	0	0	2.45025	2.45025	2.45025	2.45025	2.45025	2.45025	2.45025	0.5445	0.5445	0.5445	0.5445	0.5445
LVA	1.1	Power plants	0.19978	0.17673	0.16204	0.17787	0.1719	0.16881	0.16653	3.16622	2.48838	2.38474	2.57388	2.4799	2.46505	2.40535	0.140922	0.10487	0.0978148	0.0964317	0.0915357	0.0873953	0.0883039	0	0	0	0	0	0	0	4.75388	4.42559	3.9343	3.61221	4.25489	3.14701	3.08124	0.328104	0.195042	0.06017	0.052062	0.044396	0.035924	0.027452	0.147538	0.0907588	0.03347	0.0297248	0.0250496
LVA	1.2	Refineries	0	0	0	0	0	0	0	0	0	0	0	0	0	0	0	0	0	0	0	0	0	0	0	0	0	0	0	0	0	0	0	0	0	0	0	0.0391024	0.0213956	0.00311	0.002883	0.002656	0.002429	0.002202	0.0168996	0.008454	0.00131	0.0012152	0.0011204
LVA	2.1	Residential combustion (including commercial/institutional)	11.6402	11.9625	12.0201	11.659	11.6052	10.8365	11.812	183.377	185.844	187.03	180.948	177.837	172.557	190.474	30.9052	31.2299	31.4213	30.4061	29.78	29.1819	32.3536	0.121266	0.122113	0.122772	0.118785	0.115832	0.114882	0.128178	4.38113	4.5696	4.51524	4.48841	4.53279	4.11607	4.26492	12.9141	12.8649	12.8193	12.7525	12.6858	12.619	12.5523	12.0343	12.021	12.0078	11.969	11.9303
LVA	2.2	Agricultural stationary combustion	0.22554	0.25711	0.23232	0.2285	0.28202	0.15712	0.26875	1.00497	1.1697	1.07274	1.06176	1.35732	0.7187	1.34575	0.109988	0.126416	0.119049	0.121007	0.149587	0.0894046	0.147317	0	0	0	0	0	0	0	0.428183	0.475484	0.476922	0.518508	0.56795	0.467725	0.532107	0	0	0	0	0	0	0	0	0	0	0	0
LVA	34.1	Iron and steel industry (including coke ovens)	0.05619	0.05712	0.04537	0.04622	0.04921	0.04566	0.04951	0.555504	0.605907	0.484301	0.468544	0.462083	0.462425	0.498803	0.287894	0.287514	0.287514	0.288027	0.287962	0.275777	0.233948	0	0	0	0	0	0	0	3.54052	3.61796	3.46345	3.49062	3.50822	3.35989	2.87507	0.466025	0.471267	0.47651	0.460836	0.445162	0.429488	0.413814	0.373062	0.377311	0.38156	0.368736	0.355912
LVA	34.2	Non-ferrous metal industry	0.00151	0.00135	0.00101	0.00102	0.00101	0.00067	0.00051	0.00756097	0.00673657	0.00506986	0.00509295	0.00502595	0.00335736	0.00252553	0.000756097	0.000506986	0.000506986	0.000509295	0.000502595	0.000335736	0.000252553	0	0	0	0	0	0	0	0.0211707	0.0188624	0.0141956	0.0142603	0.0140727	0.00940061	0.00707148	0	0	0	0	0	0	0	0	0	0	0	0
LVA	34.3	Chemical industry	0.00236	0.00344	0.00308	0.00409	0.00407	0.00849	0.00666	0.0429145	0.0851506	0.0573476	0.101445	0.124472	0.317437	0.220756	0.00477145	0.00535196	0.00535196	0.00940535	0.0114968	0.0301929	0.0211527	0	0	0	0	0	0	0	0.0366418	0.0354382	0.035328	0.0421946	0.0375688	0.079374	0.0681224	0.125042	0.136951	0.14886	0.160769	0.173802	0.186118	0.198434	0.100926	0.110538	0.12015	0.129762	0.140413
LVA	34.4	Paper and pulp industry	0.0017	0.0017	0.00208	0.00204	0.00149	0.00121	0.0054	0.0605389	0.0605215	0.0725502	0.0622125	0.030562	0.0161968	0.262674	0.00567714	0.00678587	0.00678587	0.0058445	0.002845	0.00152728	0.0241158	0	0	0	0	0	0	0	0.0193186	0.0192698	0.0227186	0.0240048	0.0164727	0.0151194	0.0315215	0	0	0	0	0	0	0.001166	0	0	0	0	0
LVA	34.5	Cement industry	0	0	0	0	0	0	0	0	0	0	0	0	0	0	0.0554539	0.0610413	0.0610413	0.076049	0.0778118	0.0769267	0.0298332	0	0	0	0	0	0	0	0.32549	0.351	0.358286	0.446375	0.456721	0.451526	0.703309	0.0610992	0.0602496	0.0594	0.0586186	0.0578372	0.0570558	0.0562744	0.05391	0.05316	0.05241	0.051721	0.051032
LVA	34.6	Other non-metallic minerals industry	0	0	0	0	0	0	0	0.000625675	0.00365196	0.00116502	0.0011167	0.00149252	0.00153666	0.000838447	9.01003	16.7768	16.7768	16.081	21.493	22.1287	12.074	0	0	0	0	0	0	0	0	0	0	0	0	0	0	0.0034956	0.0036578	0.00382	0.0037326	0.0036452	0.0035578	0.0034704	0.0034304	0.0035902	0.00375	0.0036636	0.0035772
LVA	34.7	Storage and handling in industry	0	0	0	0	0	0	0	0	0	0	0	0	0	0	0.0055699	0.0113797	0.0113797	0.00469428	0.0130746	0.0120971	0.0097615	0	0	0	0	0	0	0	0	0	0	0	0	0	0	0.399934	0.405072	0.41021	0.409029	0.407847	0.406666	0.405484	0.045032	0.045601	0.04617	0.0460406	0.0459112
LVA	34.8	Other industries	0.1585	0.20318	0.23213	0.25989	0.23521	0.24352	0.2984	5.78896	7.93456	9.9321	11.7146	10.6085	11.0681	14.7945	2.75683	3.12519	3.12519	3.13327	2.43632	2.41885	2.67476	0	0	0	0	0	0	0	1.47593	1.68301	1.89409	2.10696	2.0216	1.9261	2.06637	0.490526	0.49565	0.49987	0.500816	0.501762	0.502708	0.503654	0.181015	0.181947	0.18288	0.180693	0.178505
LVA	5.1	Coal production	0	0	0	0	0	0	0	0	0	0	0	0	0	0	0	0	0	0	0	0	0	0	0	0	0	0	0	0	0	0	0	0	0	0	0	0	0	0	0	0	0	0	0	0	0	0	0
LVA	5.2	Oil production	0	0	0	0	0	0	0	0	0	0	0	0	0	0	0	0	0	0	0	0	0	0	0	0	0	0	0	0	0	0	0	0	0	0	0	0	0	0	0	0	0	0	0	0	0	0	0
LVA	5.3	Gas production	0	0	0	0	0	0	0	0	4.6e-06	0	0	0	0	0	0	0	0	0	0	0	0	0	0	0	0	0	0	0	0	1.3e-06	0	0	0	0	0	0	0	0	0	0	0	0	0	0	0	0	0
LVA	5.4	Gasoline distribution	0	0	0	0	0	0	0	0	0	0	0	0	0	0	1.32403	1.4072	0.86111	0.642057	0.629303	0.498766	0.643294	0	0	0	0	0	0	0	0	0	0	0	0	0	0	0	0	0	0	0	0	0	0	0	0	0	0
LVA	5.5	Flaring	0	0	0	0	0	0	0	0	0	0	0	0	0	0	0	0	0	0	0	0	0	0	0	0	0	0	0	0	0	0	0	0	0	0	0	0	0	0	0	0	0	0	0	0	0	0	0
LVA	6.1	Solvent and other product use	0	0	0	0	0	0	0	0	0	0	0	0	0	0	8.0846	10.2429	11.2512	15.286	20.9098	13.672	8.03061	0	0	0	0	0	0	0	0	0	0	0	0	0	0	0	0	0	0	0	0	0	0	0	0	0	0
LVA	7.1	Road transport, light duty vehicles	0.324889	0.296891	0.253426	0.237631	0.210651	0.163182	0.116487	57.4948	49.95	39.3294	35.1193	28.628	20.7342	15.3574	8.38048	7.41538	5.82351	5.21563	4.12038	2.88335	2.05063	0.134576	0.162696	0.244591	0.27408	0.296744	0.262474	0.221182	8.58809	8.13026	6.84707	6.73667	6.43654	5.43413	4.03721	0.440747	0.545028	0.64931	0.620862	0.592414	0.563965	0.535517	0.440747	0.545028	0.64931	0.620862	0.592414
LVA	7.2	Road transport, heavy duty vehicles	0.0785208	0.0762757	0.0699107	0.0691509	0.0657284	0.0543502	0.0415319	4.66699	4.10912	3.83429	3.72478	3.61276	3.08967	1.94173	1.56523	1.31344	1.23536	1.14022	1.03611	0.853312	0.537704	0.00635663	0.00653334	0.00637155	0.006714	0.00710982	0.00599853	0.00379127	11.3568	11.192	11.5582	12.0695	12.6242	11.1852	7.06215	0.300196	0.286918	0.27364	0.264192	0.254745	0.245297	0.23585	0.296962	0.283326	0.26969	0.260195	0.250701
LVA	7.3	Road transport, mopeds and motorcycles	0.0583503	0.0569331	0.052433	0.0534583	0.0513002	0.0432182	0.0336211	0.0901763	0.103163	0.114825	0.140653	0.177633	0.173971	0.292288	0.0282447	0.0322857	0.0390357	0.0495563	0.0588305	0.0553175	0.0788661	1.11877e-05	1.27995e-05	1.46786e-05	1.93433e-05	2.83101e-05	3.79929e-05	5.3514e-05	0.00167434	0.00191503	0.002072	0.00273639	0.00415706	0.00546998	0.00705468	0.0376932	0.0361466	0.0346	0.034179	0.033758	0.033337	0.032916	0.0376932	0.0361466	0.0346	0.034179	0.033758
LVA	7.4	Road transport, gasoline evaporation	0	0	0	0	0	0	0	0	0	0	0	0	0	0	0	0	0	0	0	0	0	0	0	0	0	0	0	0	0	0	0	0	0	0	0	0	0	0	0	0	0	0	0	0	0	0	0
LVA	7.5	Road transport, wear	0	0	0	0	0	0	0	0	0	0	0	0	0	0	0	0	0	0	0	0	0	0	0	0	0	0	0	0	0	0	0	0	0	0	0	0.281797	0.296978	0.31216	0.330868	0.349577	0.368285	0.386994	0.0923424	0.0985444	0.10384	0.110811	0.117782
LVA	8.1	Air transport (<1000m)	2e-05	5e-05	4e-05	3e-05	4e-05	7e-05	1e-05	0.147499	0.163785	0.206242	0.235645	0.275172	0.333479	0.354309	0.0295957	0.00754225	0.00930116	0.0104405	0.012282	0.014879	0.0151272	0	0	0	0	0	0	0	0.288659	0.119933	0.149788	0.16753	0.195089	0.236451	0.249526	0	0	0	0.001026	0.001112	0.001198	0.001284	0	0	0	0	0.001026
LVA	8.2	Rail transport	0.0144	0.01476	0.01476	0.01296	0.01404	0.01404	0.01314	0.856	0.8774	0.8774	0.7704	0.8346	0.8346	0.7811	0.372	0.3813	0.3813	0.3348	0.3627	0.3627	0.33945	0.000543872	0.000557469	0.000557469	0.000489485	0.000530275	0.000530275	0.000496283	3.168	3.2472	3.2472	2.8512	3.0888	3.0888	2.8908	0.307301	0.319166	0.33103	0.317767	0.304504	0.29124	0.277977	0.291129	0.30237	0.31361	0.301044	0.288478
LVA	8.3	Navigation, non-international	0	0	0	0	0	0	0	0	0	0	0	0	0	0	0.0205302	0.0203861	0.019	0.0176123	0.0214651	0.0212168	0.0244934	0	0	0	0	0	0	0	0.807983	0.720195	0.601	0.439016	0.454461	0.607888	1.04934	0.029812	0.030906	0.032	0.0304884	0.0289768	0.0274652	0.0259536	0.0195627	0.0202814	0.021	0.0200074	0.0190148
LVA	8.4	Mobile machinery, agriculture	0	0	0	0	0	0	0	1.45101	1.45101	1.45101	1.45101	1.45101	0	0	0.74749	0.74749	0.74749	0.74749	0.74749	0	0	0	0	0	0	0	0	0	0.0074749	0.0074749	0.0074749	0.0074749	0.0074749	0	0	0.0234148	0.0248674	0.02632	0.02554	0.02476	0.02398	0.0232	0.0221856	0.0235628	0.02494	0.0242	0.02346
LVA	8.5	Mobile machinery, industry	0	0	0	0	0	0	0	1.18719	2.37438	2.37438	2.37438	2.37438	2.37438	1.18719	0.04397	0.08794	0.08794	0.08794	0.08794	0.08794	0.04397	0	0	0	0	0	0	0	0.0092337	0.0184674	0.0184674	0.0184674	0.0184674	0.0184674	0.0092337	0.0202864	0.0155132	0.01074	0.0123488	0.0139576	0.0155664	0.0171752	0.019216	0.014693	0.01017	0.011695	0.01322
LVA	8.6	Other mobile sources	0.00033	0.00058	0.0004	0.00039	9e-05	0.00012	8e-05	11.6224	11.6326	18.5719	22.0477	22.0361	22.0362	22.0642	0.376109	0.381593	0.598545	0.707253	0.706072	0.702857	0.705744	0	0	0	0	0	0	0	0.15679	0.250564	0.1983	0.204102	0.0959452	0.100516	0.0866998	0.0223332	0.0189766	0.01562	0.0150132	0.0144064	0.0137996	0.0131928	0.0205464	0.0174582	0.01437	0.0138118	0.0132536
LVA	9.1	Landfills	26.0555	25.3642	25.8726	26.5884	27.5565	28.2454	28.2531	0	0	0	0	0	0	0	0.440297	0.428616	0.437207	0.449303	0.465662	0.477303	0.477435	0	0	0	0	0	0	0	0	0	0	0	0	0	0	0	0	0	0	0	0	0	0	0	0	0	0
LVA	9.2	Controlled waste incineration	0	0	0	0	0	0	0	0.000127827	0.000329219	0.000301014	0.000788323	0.00102025	5.55933e-05	4.66564e-05	0.00152184	0.00163355	0.00166343	0.00600091	0.0042453	0.0022268	0.00148816	0	0	0	0	0	0	0	0.000232427	0.000340064	0.000330138	0.00105061	0.00096144	0.000278088	0.000190328	0	0	0	0	0	0	0	0	0	0	0	0
LVA	9.3	Other waste treatment	11.6348	13.4172	12.6911	9.5806	9.20338	12.2646	10.1985	0.00024675	0.00024675	0.00024675	0.00024675	0.00024675	0.00024675	0.00024675	0.00345775	0.00318775	0.00341275	0.00296275	0.00317275	0.00383275	0.00428275	1.11251	1.2591	1.13478	1.13682	1.10521	1.56847	1.1992	0.00054075	0.00054075	0.00054075	0.00054075	0.00054075	0.00054075	0.00054075	0.433805	0.431897	0.42999	0.428496	0.427002	0.425509	0.424015	0.416525	0.414617	0.41271	0.411216	0.409722
LVA	10.1	Livestock, Cattle	32.0627	31.6814	32.7668	32.4325	33.921	32.9269	32.9329	0	0	0	0	0	0	0	0	0	0	0	0	0	0	6.70349	6.51383	6.63484	6.49977	6.77431	6.44583	6.37869	0	0	0	0	0	0	0	0.0899588	0.0905594	0.09116	0.090883	0.090606	0.090329	0.090052	0.019986	0.020118	0.02025	0.02019	0.02013
LVA	10.2	Livestock, Poultry	0.31223	0.31586	0.3192	0.35006	0.37105	0.3604	0.37665	0	0	0	0	0	0	0	0	0	0	0	0	0	0	1.10594	1.11879	1.13061	1.23993	1.31425	1.27654	1.33412	0	0	0	0	0	0	0	0.181874	0.186727	0.19158	0.192648	0.193715	0.194783	0.19585	0.0404144	0.0414922	0.04257	0.042808	0.043046
LVA	10.3	Livestock, Sheep	0.31941	0.31613	0.3407	0.33579	0.44226	0.54955	0.57903	0	0	0	0	0	0	0	0	0	0	0	0	0	0	0.0438332	0.0426186	0.0995169	0.0980816	0.129181	0.160519	0.169131	0	0	0	0	0	0	0	0	0	0	0	0	0	0	0	0	0	0	0
LVA	10.4	Livestock, Goats	0.0768	0.07526	0.07629	0.07168	0.06656	0.06605	0.06758	0	0	0	0	0	0	0	0	0	0	0	0	0	0	0.0168589	0.0162304	0.0356443	0.0334913	0.031099	0.0308598	0.0315775	0	0	0	0	0	0	0	0	0	0	0	0	0	0	0	0	0	0	0
LVA	10.5	Livestock, Pigs	2.4442	2.39635	2.35345	2.2935	2.277	2.11035	2.07075	0	0	0	0	0	0	0	0	0	0	0	0	0	0	2.02816	1.98846	1.95286	1.90312	1.88942	1.75114	1.71828	0	0	0	0	0	0	0	0.18121	0.18422	0.18723	0.178527	0.169825	0.161122	0.15242	0.032212	0.032746	0.03328	0.031734	0.030188
LVA	10.6	Livestock, Other animals	0.291	0.3007	0.26966	0.2716	0.2522	0.25414	0.24444	0	0	0	0	0	0	0	0	0	0	0	0	0	0	0.132562	0.13793	0.126422	0.127331	0.118236	0.119145	0.114598	0	0	0	0	0	0	0	0	0	0	0	0	0	0	0	0	0	0	0
LVA	10.7	Crops and pastures	0	0	0	0	0	0	0	0	0	0	0	0	0	0	0	0	0	0	0	0	0	3.74	3.52	4.09	4.27	4.61	4.75	5.19	0	0	0	0	0	0	0	0	0	0	0	0	0	0	0	0	0	0	0
LVA	10.8	Agricultural waste burning	1.157	1.157	1.157	1.157	1.157	1.157	1.157	0.00829192	0.00889567	0.0108	0.0100495	0.0123426	0.0123426	0.0125417	1.5024	1.5012	1.5	1.5012	1.5024	1.5036	1.5048	0.2304	0.2302	0.23	0.2302	0.2304	0.2306	0.2308	0.2416	0.2408	0.24	0.2408	0.2416	0.2424	0.2432	1.26387	1.26387	1.26387	1.26387	1.26387	1.26387	1.26387	1.12146	1.12146	1.12146	1.12146	1.12146
LVA	10.9	Rice cultivation	0	0	0	0	0	0	0	0	0	0	0	0	0	0	0	0	0	0	0	0	0	0	0	0	0	0	0	0	0	0	0	0	0	0	0	0	0	0	0	0	0	0	0	0	0	0	0
LVA	10.10	Storage and handling of agricultural products	0	0	0	0	0	0	0	0	0	0	0	0	0	0	0	0	0	0	0	0	0	0	0	0	0	0	0	0	0	0	0	0	0	0	0	0.0306736	0.0306718	0.03067	0.0306718	0.0306736	0.0306754	0.0306772	0.0054116	0.0054108	0.00541	0.0054108	0.0054116
LVA	10.11	Other agriculture	0	0	0	0	0	0	0	1.01492	0.475566	0.147892	1.82706	0.286607	0.0828271	0.315915	0	0	0	0	0	0	0	0	0	0	0	0	0	0	0.0688082	0.0322417	0.0100266	0.123869	0.019431	0.00561539	0.0214179	1.60533	1.60533	1.60533	1.60533	1.60533	1.60534	1.60534	0.356741	0.35674	0.35674	0.35674	0.356741
MLT	1.1	Power plants	0.07769	0.07567	0.07709	0.07764	0.07925	0.07786	0.07319	0.323397	0.342463	0.3642	0.352109	0.37565	0.203924	0.31792	0.13	0.13	0.13	0.13	0.13	0.13	0.13	0	0	0	0	0	0	0	5.17908	5.04463	5.13923	5.17593	5.28304	5.19098	4.87934	0.924822	0.923107	0.954173	0.965571	0.991158	0.913634	0.913634	0.288546	0.285514	0.293619	0.296633	0.303892
MLT	1.2	Refineries	0	0	0	0	0	0	0	0	0	0	0	0	0	0	0	0	0	0	0	0	0	0	0	0	0	0	0	0	0	0	0	0	0	0	0	0	0	0	0	0	0	0	0	0	0	0	0
MLT	2.1	Residential combustion (including commercial/institutional)	0.00946	0.01117	0.00365	0.0039	0.00392	0.00376	0.0035	5.48369	5.6319	3.40878	3.55699	3.55699	3.55699	3.27845	0.0067	0.0075082	0.00360901	0.00387288	0.00389869	0.00373976	0.00373976	0	0	0	0	0	0	0	0.0946618	0.111631	0.0364928	0.038981	0.0391782	0.0375519	0.0350054	0	0	0	0	0	0	0	0	0	0	0	0
MLT	2.2	Agricultural stationary combustion	0	0	7e-05	8e-05	8e-05	8e-05	8e-05	0	0	0	0	0	0	0	0	0	0.000174	0.0002004	0.000196691	0.00019329	0.00019329	0	0	0	0	0	0	0	0	0	0	0	0	0	0	0	0	0	0	0	0	0	0	0	0	0	0
MLT	34.1	Iron and steel industry (including coke ovens)	0.00162	0.00192	0.00384	0.00293	0.00347	0.00331	0.00236	0	0	0	0	0	0	0	0	0	0	0	0	0	0	0	0	0	0	0	0	0	0.131613	0.162056	0.332827	0.225009	0.287229	0.273961	0.178416	0	0	0	0	0	0	0	0	0	0	0	0
MLT	34.2	Non-ferrous metal industry	0	0	0	0	0	0	0	0	0	0	0	0	0	0	0	0	0	0	0	0	0	0	0	0	0	0	0	0	0	0	0	0	0	0	0	0	0	0	0	0	0	0	0	0	0	0	0
MLT	34.3	Chemical industry	0	0	0	0	0	0	0	0	0	0	0	0	0	0	0	0	0	0	0	0	0	0	0	0	0	0	0	0	0	0	0	0	0	0	0	0	0	0	0	0	0	0	0	0	0	0	0
MLT	34.4	Paper and pulp industry	0	0	0	0	0	0	0	0	0	0	0	0	0	0	0	0	0	0	0	0	0	0	0	0	0	0	0	0	0	0	0	0	0	0	0	0	0	0	0	0	0	0	0	0	0	0	0
MLT	34.5	Cement industry	0	0	0	0	0	0	0	0	0	0	0	0	0	0	0	0	0	0	0	0	0	0	0	0	0	0	0	0	0	0	0	0	0	0	0	0	0	0	0	0	0	0	0	0	0	0	0
MLT	34.6	Other non-metallic minerals industry	0	0	0	0	0	0	0	0	0	0	0	0	0	0	0.00212106	0.0302382	0.0375172	0.0408759	0.044005	0.0248948	0.0248948	0	0	0	0	0	0	0	0	0	0	0	0	0	0	0	0	0	0	0	0	0	0	0	0	0	0
MLT	34.7	Storage and handling in industry	0	0	0	0	0	0	0	0	0	0	0	0	0	0	0.0963256	0.0364977	0.0364977	0.0364977	0.0364977	0.0364977	0.0364977	0	0	0	0	0	0	0	0	0	0	0	0	0	0	0	0	0	0	0	0	0	0	0	0	0	0
MLT	34.8	Other industries	0	0	0	0	0	0	0	0	0	0	0	0	0	0	0.168477	0.169091	0.174027	0.170794	0.171601	0.170642	0.170642	0	0	0	0	0	0	0	0	0	0	0	0	0	0	0.0042496	0.00550354	0.0136925	0.0101404	0.0126347	0.0117928	0.0117928	0.0042496	0.00550354	0.0136925	0.0101404	0.0126347
MLT	5.1	Coal production	0	0	0	0	0	0	0	0	0	0	0	0	0	0	0	0	0	0	0	0	0	0	0	0	0	0	0	0	0	0	0	0	0	0	0	0	0	0	0	0	0	0	0	0	0	0	0
MLT	5.2	Oil production	0	0	0	0	0	0	0	0	0	0	0	0	0	0	0	0	0	0	0	0	0	0	0	0	0	0	0	0	0	0	0	0	0	0	0	0	0	0	0	0	0	0	0	0	0	0	0
MLT	5.3	Gas production	0	0	0	0	0	0	0	0	0	0	0	0	0	0	0	0	0	0	0	0	0	0	0	0	0	0	0	0	0	0	0	0	0	0	0	0	0	0	0	0	0	0	0	0	0	0	0
MLT	5.4	Gasoline distribution	0	0	0	0	0	0	0	0	0	0	0	0	0	0	0	0	0	0	0	0	0	0	0	0	0	0	0	0	0	0	0	0	0	0	0	0	0	0	0	0	0	0	0	0	0	0	0
MLT	5.5	Flaring	0	0	0	0	0	0	0	0	0	0	0	0	0	0	0	0	0	0	0	0	0	0	0	0	0	0	0	0	0	0	0	0	0	0	0	0	0	0	0	0	0	0	0	0	0	0	0
MLT	6.1	Solvent and other product use	0	0	0	0	0	0	0	0	0	0	0	0	0	0	1.33118	1.52386	1.65876	1.95246	1.7893	1.54727	1.54727	0	0	0	0	0	0	0	0	0	0	0	0	0	0	0	0	0	0	0	0	0	0	0	0	0	0
MLT	7.1	Road transport, light duty vehicles	0.059369	0.0606536	0.0636333	0.0613791	0.0577832	0.053378	0.0483853	5.68017	4.00739	3.86941	3.67567	2.67566	1.27965	0.81064	0.647819	0.557376	0.493847	0.431117	0.377722	0.315758	0.315758	0.0248869	0.0256856	0.0266968	0.0278189	0.0281515	0.02937	0.02937	3.60182	3.19153	2.78669	2.85495	2.62255	2.46364	2.37777	0.0933195	0.115646	0.111334	0.116271	0.116271	0.121622	0.121622	0.0921868	0.0863734	0.108998	0.113749	0.111719
MLT	7.2	Road transport, heavy duty vehicles	0.00312468	0.00177091	0	0.00137007	0.00291835	0.00465506	0.00662813	1.08533	0.76571	0.739344	0.702327	0.511251	0.244509	0.154892	0.398222	0.335143	0.263484	0.263033	0.22324	0.198732	0.198732	0.00106322	0.0009932	0.000855418	0.000961061	0.00092227	0.000877766	0.000877766	0	0	0	0	0	0	0	0.87019	0.856862	0.954674	0.948242	0.957267	1.06078	1.06078	0.87019	0.856862	0.890499	0.908847	0.925551
MLT	7.3	Road transport, mopeds and motorcycles	0.0175763	0.0154955	0.0127267	0.0164408	0.0204284	0.024827	0.0298266	2.91609	2.05732	1.98648	1.88702	1.37364	0.656949	0.416167	0.0260666	0.0263135	0.045112	0.0582951	0.0557375	0.0659499	0.0659499	2.41508e-05	2.3293e-05	4.78213e-05	5.61444e-05	5.60544e-05	6.68737e-05	6.68737e-05	0	0	0	0	0	0	0	0.00290741	0.00272114	0.00373656	0.00391152	0.00409496	0.00451024	0.00451024	0.00290741	0.00272114	0.00373656	0.00391152	0.00409496
MLT	7.4	Road transport, gasoline evaporation	0	0	0	0	0	0	0	0	0	0	0	0	0	0	0	0	0	0	0	0	0	0	0	0	0	0	0	0	0	0	0	0	0	0	0	0	0	0	0	0	0	0	0	0	0	0	0
MLT	7.5	Road transport, wear	0	0	0	0	0	0	0	0	0	0	0	0	0	0	0	0	0	0	0	0	0	0	0	0	0	0	0	0	0	0	0	0	0	0	0	0	0	0	0	0	0	0	0	0	0	0	0
MLT	8.1	Air transport (<1000m)	0.00013	0.00015	9e-05	8e-05	6e-05	6e-05	6e-05	0	0	0	0	0	0	0	0.0212862	0.0204661	0.0401338	0.0434399	0.0437782	0.0437782	0.0437782	0	0	0	0	0	0	0	0.0111527	0.0121711	0.00728823	0.00640926	0.00466626	0.00507213	0.00503478	0	0	0	0	0	0	0	0	0	0	0	0
MLT	8.2	Rail transport	0	0	0	0	0	0	0	0	0	0	0	0	0	0	0	0	0	0	0	0	0	0	0	0	0	0	0	0	0	0	0	0	0	0	0	0	0	0	0	0	0	0	0	0	0	0	0
MLT	8.3	Navigation, non-international	0	0	0	0	0	0	0	0	0	0	0	0	0	0	0	0	0	0	0	0	0	0	0	0	0	0	0	0	0	0	0	0	0	0	0	0	0	0	0	0	0	0	0	0	0	0	0
MLT	8.4	Mobile machinery, agriculture	0	0	0	0	0	0	0	0	0	0	0	0	0	0	0	0.320939	0.320984	0.320984	0.320984	0.320984	0.320984	0	0	0	0	0	0	0	0	0	0.00696863	0.00801635	0.00786765	0.00773161	0.00788606	0	0	0	0	0	0	0	0	0	0	0	0
MLT	8.5	Mobile machinery, industry	0	0	0	0	0	0	0	0	0	0	0	0	0	0	0	0	0	0	0	0	0	0	0	0	0	0	0	0	0	0	0	0	0	0	0	0	0	0	0	0	0	0	0	0	0	0	0
MLT	8.6	Other mobile sources	0	0	0	0	0	0	0	0	0	0	0	0	0	0	0	0	0	0	0	0	0	0	0	0	0	0	0	0	0	0	0	0	0	0	0	0	0	0	0	0	0	0	0	0	0	0	0
MLT	9.1	Landfills	6.81889	6.99212	7.39562	7.80207	8.18277	8.6569	9.11866	0	0	0	0	0	0	0	0	0	0	0	0	0	0	0.010983	0.0109629	0.0100843	0.0101471	0.011411	0.0116466	0.0116466	0	0	0	0	0	0	0	0	0	0	0	0	0	0	0	0	0	0	0
MLT	9.2	Controlled waste incineration	0.00165	3e-05	3e-05	3e-05	3e-05	0	0	0	0	0	0	0	0	0	0.00075072	0.00073865	0.00073865	0.00073865	0.00073865	0.00351327	0.00351327	0	0	0	0	0	0	0	0.00146048	0.00098725	0.00098725	0.00098725	0.00098725	0.008114	0.00733753	0.0034251	9.9e-08	9.9e-08	9.9e-08	9.9e-08	9.43088e-06	9.43088e-06	0.00230007	6.6e-08	6.6e-08	6.6e-08	6.6e-08
MLT	9.3	Other waste treatment	0.83638	0.84658	0.85251	0.87723	0.79868	0.75644	0.70841	0	0	0	0	0	0	0	0	0	0	0	0	0	0	0.00614602	0.00621513	0.00625731	0.00641354	0.0059492	0.00981005	0.00981005	0	0	0	0	0	0	0	0	0	0	0	0	0	0	0	0	0	0	0
MLT	10.1	Livestock, Cattle	1.79805	1.9152	1.93769	1.87739	1.89548	1.75961	1.6327	0	0	0	0	0	0	0	0	0	0	0	0	0	0	0.314228	0.335089	0.33916	0.328742	0.33194	0.307795	0.307795	0	0	0	0	0	0	0	0.00777878	0.00841531	0.00856013	0.00833943	0.00819764	0.00770811	0.00770811	0.00172942	0.00187093	0.00190313	0.00185406	0.00182254
MLT	10.2	Livestock, Poultry	0.30863	0.30863	0.23713	0.23713	0.27451	0.27451	0.27451	0	0	0	0	0	0	0	0	0	0	0	0	0	0	0.447244	0.447244	0.341701	0.341701	0.39369	0.39369	0.39369	0	0	0	0	0	0	0	0.0723264	0.0723264	0.0740543	0.065981	0.0579078	0.0579078	0.0579078	0.0160555	0.0160555	0.0164391	0.014647	0.0128548
MLT	10.3	Livestock, Sheep	0.12305	0.117	0.12124	0.10079	0.10197	0.10634	0.10672	0	0	0	0	0	0	0	0	0	0	0	0	0	0	0.00683606	0.0064998	0.00673532	0.00559912	0.0056649	0.00590778	0.00590778	0	0	0	0	0	0	0	0	0	0	0	0	0	0	0	0	0	0	0
MLT	10.4	Livestock, Goats	0.02784	0.02919	0.03249	0.03019	0.03226	0.03295	0.031	0	0	0	0	0	0	0	0	0	0	0	0	0	0	0.00247204	0.0025921	0.00288512	0.00268088	0.00286442	0.00292606	0.00292606	0	0	0	0	0	0	0	0	0	0	0	0	0	0	0	0	0	0	0
MLT	10.5	Livestock, Pigs	0.84027	0.88381	0.83979	0.84735	0.88435	0.75338	0.75806	0	0	0	0	0	0	0	0	0	0	0	0	0	0	0.833694	0.876893	0.833215	0.840723	0.877429	0.747481	0.747481	0	0	0	0	0	0	0	0.0319741	0.0336309	0.0319557	0.0260866	0.0346518	0.0286676	0.0286676	0.00568461	0.00597916	0.00568134	0.00463789	0.00616067
MLT	10.6	Livestock, Other animals	0.01712	0.01712	0.01712	0.01712	0.01712	0.01712	0.01712	0	0	0	0	0	0	0	0	0	0	0	0	0	0	0.020374	0.020374	0.020374	0.020374	0.020374	0.020374	0.020374	0	0	0	0	0	0	0	0	0	0	0	0	0	0	0	0	0	0	0
MLT	10.7	Crops and pastures	0	0	0	0	0	0	0	0	0	0	0	0	0	0	0	0	0	0	0	0	0	0.0087801	0.0102907	0.0166361	0.0108177	0.0134436	0.00692	0.00692	0	0	0	0	0	0	0	0	0	0	0	0	0	0	0	0	0	0	0
MLT	10.8	Agricultural waste burning	0	0	0	0	0	0	0	0	0	0	0	0	0	0	0	0	0	0	0	0	0	0	0	0	0	0	0	0	0	0	0	0	0	0	0	0	0	0	0	0	0	0	0	0	0	0	0
MLT	10.9	Rice cultivation	0	0	0	0	0	0	0	0	0	0	0	0	0	0	0	0	0	0	0	0	0	0	0	0	0	0	0	0	0	0	0	0	0	0	0	0	0	0	0	0	0	0	0	0	0	0	0
MLT	10.10	Storage and handling of agricultural products	0	0	0	0	0	0	0	0	0	0	0	0	0	0	0	0	0	0	0	0	0	0	0	0	0	0	0	0	0	0	0	0	0	0	0	0	0	0	0	0	0	0	0	0	0	0	0
MLT	10.11	Other agriculture	0	0	0	0	0	0	0	0	0	0	0	0	0	0	0	0	0	0	0	0	0	0	0	0	0	0	0	0	0	0	0	0	0	0	0	0	0	0	0	0	0	0	0	0	0	0	0
POL	1.1	Power plants	2.03338	2.13469	2.41922	2.58091	2.64968	2.9891	3.44188	24.1836	28.4037	30.9309	32.1215	32.2786	32.9874	35.5964	19.4284	19.3142	19.2	19.5414	19.8828	20.2254	20.5672	0	0	0	0	0	0	0	326.062	312.881	299.7	287.66	275.619	263.579	251.538	27.8928	27.8435	24.4463	24.9327	26.0201	17.3855	16.7225	8.2256	8.2056	8.1894	9.36374	13.056
POL	1.2	Refineries	0.1606	0.17093	0.16552	0.19065	0.17504	0.17493	0.17562	7.64158	8.74701	7.38651	7.15777	6.24936	5.55456	6.41727	18.5328	18.4244	18.32	19.0268	19.7348	20.4422	21.1496	0	0	0	0	0	0	0	11.3764	11.0426	10.71	10.7102	10.7104	10.7106	10.7108	0.8521	0.8318	0.8107	0.591794	0.968147	0.970603	0.966933	0.5169	0.5016	0.4846	0.326493	0.525647
POL	2.1	Residential combustion (including commercial/institutional)	89.0657	87.7198	96.4288	107.265	99.9736	104.248	105.911	1468.57	1498.05	1527.33	1615.86	1528.13	1561.69	1558.51	78.1473	78.2687	78.3901	78.0639	77.7377	77.4115	77.0853	0	0	0	0	0.426937	0.459713	0.460702	60.8227	61.814	62.8051	62.9406	63.0759	63.2113	63.3468	117.372	108.773	119.953	116.337	103.954	110.443	111.997	52.2796	49.4825	52.5393	50.7816	46.05
POL	2.2	Agricultural stationary combustion	16.7841	16.7774	17.9133	20.1291	18.2341	19.3801	19.5836	0	0	0	0	0	0	0	0	0	0	0	0	0	0	0	0	0	0	0	0	0	0	0	0	0	0	0	0	20.2109	18.995	20.9019	21.4225	18.6688	20.1115	20.2579	10.1199	9.6823	10.3883	9.54488	8.48085
POL	34.1	Iron and steel industry (including coke ovens)	6.69828	6.88507	6.02246	6.79923	7.20216	6.86311	4.94305	178.681	200.661	162.89	166.488	156.773	134.207	144.012	0	0	0	0	0	0	0	0	0	0	0	0	0.0491537	0.0354566	2.516	2.268	2.02	1.9358	1.8516	1.7674	1.6832	7.34834	4.4919	2.8022	14.6468	15.0053	5.60234	4.02269	3.85443	1.7405	1.227	8.89785	9.21307
POL	34.2	Non-ferrous metal industry	0.16476	0.1328	0.09645	0.09942	0.10642	0.11155	0.10244	1.10233	1.22946	1.09059	1.1995	1.26188	1.14121	1.14051	0	0	0	0	0	0	0	0	0	0	0	0	0	0	0	0	0	0	0	0	0	8.79292	9.2304	7.1318	1.19309	1.09913	0.449312	0.332036	5.76117	5.9788	4.5168	0.734479	0.701636
POL	34.3	Chemical industry	12.5947	13.8449	14.0043	13.4264	13.9192	14.2517	11.8693	6.54966	7.30501	6.47991	7.12701	7.49765	6.78068	6.7765	20.158	19.924	19.69	19.5224	19.3548	19.1872	19.0196	2.8	3.36	3.87	4.28108	0.0241754	0.0248515	0.0201089	15.8584	17.1092	18.36	17.8666	17.3732	16.8798	16.3864	3.82597	3.8639	4.053	3.99047	4.20958	1.77484	1.40801	2.86582	2.8953	3.0377	2.98983	3.15415
POL	34.4	Paper and pulp industry	0.69718	0.72266	0.70489	1.03999	1.03537	0.68657	0.6756	24.7521	27.6067	24.4886	26.9341	28.3348	25.6252	25.6094	0.8572	0.8836	0.91	0.7394	0.5688	0.3982	0.2276	0	0	0	0	0	0	0	2.9972	3.1686	3.34	2.8104	2.282	1.753	1.224	0	0	0	0	0	0.65592	0.66104	0	0	0	0	0
POL	34.5	Cement industry	0	0	0	0	0	0	0	0	0	0	0	0	0	0	0	0	0	0	0	0	0	0	0	0	0	0	0	0	36.7336	35.4368	34.14	32.103	30.066	28.029	25.992	0	0	0	0	0	3.44134	3.1074	0	0	0	0	0
POL	34.6	Other non-metallic minerals industry	0	0	0	0	0	0	0	7.81304	8.71409	7.72983	8.50176	8.94389	8.08863	8.08364	0	0	0	0	0	0	0	0	0	0	0	1.0725	1.07115	0.800871	16.0704	16.2102	16.35	14.61	12.87	11.13	9.39	0	0	0	0	0	1.86381	1.70639	0	0	0	0	0
POL	34.7	Storage and handling in industry	0	0	0	0	0	0	0	0	0	0	0	0	0	0	0	0	0	0	0	0	0	0	0	0	0	0	0	0	0	0	0	0	0	0	0	0	0	0	0	0	0	0	0	0	0	0	0
POL	34.8	Other industries	1.7427	1.673	1.63691	1.68397	1.81737	1.72478	1.73785	25.1165	28.0132	24.8491	27.3306	28.7519	26.0025	25.9864	1.9672	1.9086	1.85	1.7242	1.5984	1.4726	1.3468	0	0	0	0	0	0	0	29.396	28.9574	28.52	27.1762	25.834	24.491	23.148	28.8525	29.1813	29.7154	26.2754	28.4883	16.1626	14.5321	14.0915	14.8707	14.7796	12.3763	13.9037
POL	5.1	Coal production	480.8	472.481	459.042	442.107	410.388	387.212	350.075	0	0	0	0	0	0	0	0	0	0	0	0	0	0	0	0	0	0	0	0	0	0	0	0	0	0	0	0	16.7693	16.7157	16.3046	16.028	15.1856	14.769	13.7991	1.68097	1.6757	1.6347	1.60697	1.52301
POL	5.2	Oil production	349.895	354.323	352.533	334.858	309.369	289.899	261.512	0	0	0	0	0	0	0	2.2796	2.3148	2.35	2.386	2.422	2.458	2.494	0	0	0	0	0	0	0	0	0	0	0	0	0	0	0	0	0	0	0	0	0	0	0	0	0	0
POL	5.3	Gas production	463.807	463.672	456.019	452.685	437.219	428.441	404.334	0	0	0	0	0	0	0	6.5468	6.5584	6.57	6.559	6.548	6.537	6.526	0	0	0	0	0	0	0	0	0	0	0	0	0	0	0.80179	0.8635	0.8635	0	0	0	0	0.80179	0.8635	0.8635	0	0
POL	5.4	Gasoline distribution	0	0	0	0	0	0	0	0	0	0	0	0	0	0	14.306	13.213	12.12	11.697	11.274	10.851	10.428	0	0	0	0	0	0	0	0	0	0	0	0	0	0	0	0	0	0	0	0	0	0	0	0	0	0
POL	5.5	Flaring	0	0	0	0	0	0	0	1.29353	1.31232	1.3311	1.34989	1.36867	1.38746	1.40623	0	0	0	0	0	0	0	0	0	0	0	0	0	0	0.0676	0.0688	0.07	0.0704	0.0708	0.0712	0.0716	0	0	0	0	0	0	0	0	0	0	0	0
POL	6.1	Solvent and other product use	0	0	0	0	0	0	0	0	0	0	0	0	0	0	131.435	127.817	124.2	120.201	116.202	112.204	108.205	0	0	0	0	0.00765204	0.00928336	0.00996132	0	0	0	0	0	0	0	0	0	0	0	0	0	0	0	0	0	0	0
POL	7.1	Road transport, light duty vehicles	3.84151	4.0363	3.88446	4.06276	3.96879	4.12846	4.11932	524.217	510.513	486.024	474.311	442.982	429.247	338.509	118.984	110.572	102.16	98.0308	93.9016	89.7724	85.6432	0	0	0	0	0.70721	0.757234	0.7591	126.814	123.837	120.86	119.937	119.014	118.092	117.169	3.6643	4.1547	3.9529	4.40461	5.2954	6.26075	6.4152	3.6643	4.1547	3.9529	4.40461	5.2954
POL	7.2	Road transport, heavy duty vehicles	0.313814	0.381252	0.422837	0.446062	0.43972	0.461833	0.465539	33.2811	32.4111	30.8564	30.1127	28.1238	27.2518	21.491	6.8372	7.5636	8.29	8.0354	7.7808	7.5262	7.2716	0	0	0	0	0.062082	0.068592	0.0702902	90.6992	100.76	110.82	112.211	113.603	114.994	116.386	11.8235	11.9496	11.0009	11.1489	11.4332	11.4402	11.7234	11.8235	11.9496	11.0009	11.1489	11.4332
POL	7.3	Road transport, mopeds and motorcycles	0.401809	0.433011	0.428474	0.449714	0.440949	0.46051	0.461438	142.142	138.426	131.786	128.61	120.115	116.391	91.7874	23.274	22.467	21.66	20.8736	20.0872	19.3008	18.5144	0	0	0	0	0.001575	0.0018081	0.00180916	0.8624	0.9062	0.95	1.0456	1.1412	1.2368	1.3324	0.0005	0.0004	0.0004	0.0003377	0.000275	0.0003157	0.000315886	0.0005	0.0004	0.0004	0.0003377	0.000275
POL	7.4	Road transport, gasoline evaporation	0	0	0	0	0	0	0	0	0	0	0	0	0	0	51.932	44.501	37.07	34.7706	32.4712	30.1718	27.8724	0	0	0	0	0	0	0	0	0	0	0	0	0	0	0	0	0	0	0	0	0	0	0	0	0	0
POL	7.5	Road transport, wear	0	0	0	0	0	0	0	0	0	0	0	0	0	0	0	0	0	0	0	0	0	0	0	0	0	0	0	0	0	0	0	0	0	0	0	2.70461	2.9	2.9	3.64349	3.64349	3.99059	3.99485	1.01838	1.0902	1.0902	1.3828	1.3828
POL	8.1	Air transport (<1000m)	0.01086	0.00821	0.00825	0.00837	0.01102	0.00848	0.00975	0	0	0	0	0	0	0	0.1812	0.1756	0.17	0.1894	0.2088	0.2282	0.2476	0	0	0	0	0	0	0	0.5528	0.5364	0.52	0.5784	0.6368	0.6952	0.7536	0	0	0	9e-05	9.5877e-05	9.33e-05	0.000105	0	0	0	9e-05	9.5877e-05
POL	8.2	Rail transport	0.0343	0.0343	0.03365	0.03089	0.03217	0.02812	0.0274	2.61682	2.0587	1.6825	1.39879	1.29811	1.16679	1.68018	1.644	1.617	1.59	1.5872	1.5844	1.5816	1.5788	0	0	0	0	0.00117789	0.000875	0.00090083	7.792	7.681	7.57	7.554	7.538	7.522	7.506	0.75717	0.7553	0.7431	0.68056	0.790869	0.5875	0.604843	0.75717	0.7553	0.7431	0.68056	0.790869
POL	8.3	Navigation, non-international	0	0	0	0	0	0	0	7.31016	5.75103	4.70011	3.90755	3.62629	3.25946	4.69362	0.150921	0.150461	0.15	0.151843	0.153685	0.155528	0.15737	0	0	0	0	0	0	0	3.114	3.0955	3.077	3.10992	3.14283	3.17575	3.20867	3.75994	0.955121	0.704	0.735375	1.89739	1.86668	2.64844	2.41589	0.613464	0.452	0.472905	1.22212
POL	8.4	Mobile machinery, agriculture	0	0	0	0	0	0	0	19.2043	15.1083	12.3475	10.2654	9.52652	8.56282	12.3304	12.3716	12.0558	11.74	11.9642	12.1884	12.4126	12.6368	0	0	0	0	0.0112206	0.0105582	0.00987202	59.0824	57.5362	55.99	56.7756	57.5612	58.3468	59.1324	5.6056	6.0892	6.3861	10.8157	7.29341	6.8628	6.41682	5.6056	6.0892	6.3861	10.8157	7.29341
POL	8.5	Mobile machinery, industry	0	0	0	0	0	0	0	1.27847	1.0058	0.822	0.68339	0.634201	0.570046	0.820865	1.7924	1.7862	1.78	1.9392	2.0984	2.2576	2.4168	0	0	0	0	0	0	0	9.4196	9.3598	9.3	10.0508	10.8016	11.5524	12.3032	0	0	0	0.633081	0.665443	0.7332	0.7332	0	0	0	0.633081	0.665443
POL	8.6	Other mobile sources	0	0	0	0	0	0	0	67.9519	53.4589	43.69	36.3227	33.7083	30.2984	43.6297	28.8408	28.3654	27.89	26.9246	25.9592	24.9938	24.0284	0	0	0	0	0	0	0	0.0712	0.0706	0.07	0.0702	0.0704	0.0706	0.0708	0	0	0	0.463442	0.48707	0.538357	0.63189	0	0	0	0.463442	0.48707
POL	9.1	Landfills	333.177	332.388	333.668	328.559	326.217	309.616	305.94	0	0	0	0	0	0	0	0	0	0	0	0	0	0	0	0	0	0	0	0	0	0	0	0	0	0	0	0	0	0	0	0	0	0	0	0	0	0	0	0
POL	9.2	Controlled waste incineration	0	0	0	0	0	0	0	0	0	0	0	0	0	0	0	0	0	0	0	0	0	0	0	0	0	0	0	0	0	0	0	0	0	0	0	16.0991	16.1473	19.0024	9.57713	9.49638	7.43313	7.43313	9.70817	9.7378	11.4012	5.58838	5.54138
POL	9.3	Other waste treatment	47.0367	47.8079	48.4782	49.0913	50.1791	50.8942	51.7634	20.4073	20.7037	21	21.2964	21.5927	21.8891	22.1853	50.8092	49.7596	48.71	47.819	46.928	46.037	45.146	8	8	8	3.2	3.2	3.2	3.2	0.4804	0.4802	0.48	0.4802	0.4804	0.4806	0.4808	6.28062	3.6719	4.569	0.92499	1.2925	1.53516	1.65264	5.89363	3.6038	4.4641	0.790446	1.1045
POL	10.1	Livestock, Cattle	434.328	423.737	431.917	442.653	449.644	455.931	451.264	0	0	0	0	0	0	0	0	0	0	0	0	0	0	112.941	109.7	109.46	100.048	101.123	102.121	100.543	0	0	0	0	0	0	0	2.19556	2.1414	2.154	2.2424	2.27848	2.3024	2.28	0.0487414	0.0475	0.0479	0.0497813	0.0505823
POL	10.2	Livestock, Poultry	11.413	10.1625	9.75569	11.061	11.7484	11.3487	10.9844	0	0	0	0	0	0	0	0	0	0	0	0	0	0	17.6164	16.48	17.48	17.7267	18.4401	18.5789	18.1325	0	0	0	0	0	0	0	3.7304	3.0676	3.3208	4.70151	4.88444	4.65867	4.63849	0.182461	0.1576	0.1585	0.197603	0.207793
POL	10.3	Livestock, Sheep	2.70017	2.65372	2.67114	2.53102	2.73848	2.69689	2.38507	0	0	0	0	0	0	0	0	0	0	0	0	0	0	0	0	0	0.439416	0.484672	0.472993	0.417518	0	0	0	0	0	0	0	0	0	0	0	0	0	0	0	0	0	0	0
POL	10.4	Livestock, Goats	0.98545	0.89989	0.72448	0.6656	0.73728	0.69683	0.60877	0	0	0	0	0	0	0	0	0	0	0	0	0	0	0	0	0	0.189781	0	0.19854	0.173723	0	0	0	0	0	0	0	0	0	0	0	0	0	0	0	0	0	0	0
POL	10.5	Livestock, Pigs	149.519	136.524	145.56	151.737	145.694	123.963	114.75	0	0	0	0	0	0	0	0	0	0	0	0	0	0	95.5289	87.24	96.03	84.9659	82.7359	70.9622	65.3102	0	0	0	0	0	0	0	7.95101	7.2723	7.2974	7.36359	4.84903	4.18002	3.83058	0.176757	0.1617	0.1622	0.163698	0.107798
POL	10.6	Livestock, Other animals	6.45687	6.22419	6.05162	5.95273	6.37931	6.30757	5.77628	0	0	0	0	0	0	0	0	0	0	0	0	0	0	4.1625	4.01	3.9	2.98783	3.41217	3.16302	2.90024	0	0	0	0	0	0	0	0.12987	0.1252	0.1217	0.11973	0.128388	0.12675	0.11622	0.00288711	0.0028	0.0027	0.00266169	0.00285416
POL	10.7	Crops and pastures	0	0	0	0	0	0	0	0	0	0	0	0	0	0	0	0	0	0	0	0	0	81.5066	87.71	87.74	73.3195	77.6584	83.9828	80.5265	0	0	0	0	0	0	0	0	0	0	0	0	0	0	0	0	0	0	0
POL	10.8	Agricultural waste burning	1.083	1.083	1.083	1.083	1.083	1.083	1.083	9.45283	11.4386	10.2	8.56584	9.97479	9.97479	9.35583	1.41	1.41	1.41	1.41	1.41	1.41	1.41	0.217	0.217	0.217	0.217	0.217	0.217	0.217	0.2232	0.2216	0.22	0.2216	0.2232	0.2248	0.2264	1.18336	1.18336	1.18336	1.18336	1.18336	1.18336	1.18336	1.05002	1.05002	1.05002	1.05002	1.05002
POL	10.9	Rice cultivation	0	0	0	0	0	0	0	0	0	0	0	0	0	0	0	0	0	0	0	0	0	0	0	0	0	0	0	0	0	0	0	0	0	0	0	0	0	0	0	0	0	0	0	0	0	0	0
POL	10.10	Storage and handling of agricultural products	0	0	0	0	0	0	0	0	0	0	0	0	0	0	0	0	0	0	0	0	0	0	0	0	0	0	0	0	0	0	0	0	0	0	0	0	0	0	0	0	0	0	0	0	0	0	0
POL	10.11	Other agriculture	0	0	0	0	0	0	0	0	0	0	0	0	0	0	0	0	0	0	0	0	0	0	0	0	0	0	0	0	0	0	0	0	0	0	0	0	0	0	0	0	0	0	0	0	0	0	0
ROU	1.1	Power plants	0.91809	0.92464	0.8312	0.95777	0.79071	0.78562	0.6617	8.42076	8.10635	6.69352	7.40346	6.73722	6.36909	5.68743	4.1388	4.1344	4.13	4.1734	4.2168	4.2602	4.3036	0.00185937	0.00195132	0.00208694	0.00203658	0.00207	0.0001	0	101.31	99.6452	97.98	90.9112	83.8424	76.7736	69.7048	56.6455	57.8761	59.1067	48.0236	36.9418	25.8586	14.7765	28.8106	29.3256	29.8399	24.5285	19.2171
ROU	1.2	Refineries	0	0	0	0	0	0	0	5.1899	5.27822	4.896	5.10575	4.94735	4.794	5.0441	12.9664	13.6616	14.36	14.472	14.584	14.6972	14.8096	0	0	0	0	0	0	0	14.63	15.0844	15.54	15.2866	15.0332	14.7798	14.5264	1.8653	1.9416	2.01789	1.88752	1.75824	1.62895	1.49871	1.17458	1.22946	1.28236	1.21323	1.1441
ROU	2.1	Residential combustion (including commercial/institutional)	30.6638	36.4883	37.8518	35.7917	36.7595	46.1742	45.1354	550.607	655.462	685.776	754.306	802.528	862.117	846.08	104.846	104.822	104.801	104.808	104.816	104.824	104.831	0.383551	0.402518	0.430495	0.420106	0.427	0.545	0.54	15.7584	16.6412	17.5241	17.5252	17.5265	17.5277	17.5288	52.794	52.8141	52.8343	52.7686	52.7029	52.6372	52.5715	50.7672	50.7325	50.6978	50.6662	50.6347
ROU	2.2	Agricultural stationary combustion	0.08313	0.08667	0.09478	0.16028	0.52869	0.24622	0.23788	0	0	0	0	0	0	0	0	0	0	0	0	0	0	0	0	0	0	0	0	0	0	0	0	0	0	0	0	0	0	0	0	0	0	0	0	0	0	0	0
ROU	34.1	Iron and steel industry (including coke ovens)	0	0	0	0	0	0	0	194.813	160.786	158.541	153.944	144.605	146.585	158.241	0	0	0	0	0	0	0	0.160786	0.168737	0.180465	0.17611	0.179	0.065	0.02	2.3168	2.4084	2.5	2.3546	2.2092	2.0638	1.9184	23.396	24.2134	25.0308	23.352	21.6732	19.9944	18.3156	19.0835	19.7899	20.4963	19.1286	17.761
ROU	34.2	Non-ferrous metal industry	0	0	0	0	0	0	0	0	0	0	0	0	0	0	0	0	0	0	0	0	0	0	0	0	0	0	0	0	0	0	0	0	0	0	0	2.60728	2.67394	2.74059	2.65336	2.56613	2.4789	2.39167	2.20968	2.26304	2.31639	2.24085	2.16532
ROU	34.3	Chemical industry	1.36535	1.96752	1.88432	2.04511	0.673	1.11196	0.55245	3.30097	2.48615	2.45911	2.33842	2.13267	2.20051	2.33397	20.5032	21.4566	22.41	21.6948	20.9796	20.2644	19.5492	0.469783	0.493014	0.52728	0.514556	0.523	0.569	0.243	9.7296	10.084	10.44	10.1168	9.7948	9.4722	9.1496	5.26799	5.38217	5.49547	5.58537	5.6745	5.76371	5.85393	4.13247	4.23566	4.33713	4.42913	4.52037
ROU	34.4	Paper and pulp industry	0	0	0	0	0	0	0	6.51082	4.90368	4.85035	4.61229	4.20647	4.34028	4.60352	0.1636	0.1654	0.17	0.1372	0.1044	0.074	0.042	0	0	0	0	0	0	0	0.6096	0.5998	0.59	0.491	0.392	0.293	0.194	0.0453948	0.0440624	0.04273	0.0347798	0.0268296	0.0201568	0.0126324	0.040416	0.039588	0.03876	0.0314854	0.0242108
ROU	34.5	Cement industry	0	0	0	0	0	0	0	0	0	0	0	0	0	0	0	0	0	0	0	0	0	0	0	0	0	0	0	0	11.6208	11.9604	12.3	12.3628	12.4256	12.4884	12.5512	8.92184	9.18349	9.44514	9.49237	9.5396	9.58682	9.63405	5.75101	5.91967	6.08833	6.11877	6.14922
ROU	34.6	Other non-metallic minerals industry	0	0	0	0	0	0	0	1.65433	1.24598	1.23242	1.17194	1.06882	1.10282	1.16971	0	0	0	0	0	0	0	0.365586	0.383665	0.410331	0.400429	0.407	0.445	0.368	1.7636	1.7418	1.72	1.5168	1.3136	1.1104	0.9072	0.322377	0.312998	0.30362	0.294172	0.284724	0.275276	0.265828	0.255554	0.244572	0.23359	0.223991	0.214391
ROU	34.7	Storage and handling in industry	0	0	0	0	0	0	0	0	0	0	0	0	0	0	0	0	0	0	0	0	0	0	0	0	0	0	0	0	0	0	0	0	0	0	0	2.39693	2.3464	2.29586	2.22568	2.1555	2.08532	2.01514	0.251236	0.250618	0.25	0.243319	0.236639
ROU	34.8	Other industries	2.07301	1.79173	1.69355	1.6188	1.6454	1.4158	1.08966	11.1048	8.36364	8.27268	7.86665	7.17449	7.40271	7.85169	1.122	1.1354	1.15	1.0846	1.0204	0.9568	0.8924	8.98247e-05	9.42666e-05	0.000100818	9.83855e-05	0.0001	0	0	16.9212	17.4648	18.01	17.0762	16.1424	15.2086	14.2748	5.70696	5.83309	5.95994	5.83343	5.70964	5.58609	5.46092	2.14778	2.19137	2.236	2.17088	2.10887
ROU	5.1	Coal production	128.781	122.876	118.732	123.738	127.566	129.089	115.866	0	0	0	0	0	0	0	0	0	0	0	0	0	0	0	0	0	0	0	0	0	0	0	0	0	0	0	0	1.16377	1.02114	0.87778	0.876803	0.875825	0.874848	0.87387	0.134948	0.127319	0.11969	0.119557	0.119425
ROU	5.2	Oil production	657.284	624.959	596.1	592.265	563.704	554.446	493.549	0	0	0	0	0	0	0	6.5864	6.6182	6.65	6.682	6.714	6.746	6.778	0	0	0	0	0	0	0	0	0	0	0	0	0	0	0	0	0	0	0	0	0	0	0	0	0	0
ROU	5.3	Gas production	80.8466	77.3103	74.1848	74.3738	71.4563	70.9784	63.8379	0	0	0	0	0	0	0	8.2184	8.0842	7.95	7.5806	7.2112	6.8418	6.4724	0	0	0	0	0	0	0	0	0	0	0	0	0	0	0	0	0	0	0	0	0	0	0	0	0	0
ROU	5.4	Gasoline distribution	0	0	0	0	0	0	0	0	0	0	0	0	0	0	6.8212	6.9706	7.12	6.9972	6.8744	6.7516	6.6288	0	0	0	0	0	0	0	0	0	0	0	0	0	0	0	0	0	0	0	0	0	0	0	0	0	0
ROU	5.5	Flaring	0	0	0	0	0	0	0	2.82439	2.88685	2.9493	3.01175	3.07421	3.13667	3.19912	0	0	0	0	0	0	0	0	0	0	0	0	0	0	0.1796	0.1748	0.17	0.1696	0.1692	0.1688	0.1684	0.229407	0.223313	0.21722	0.216787	0.216353	0.21592	0.215486	0.229407	0.223313	0.21722	0.216787	0.216353
ROU	6.1	Solvent and other product use	0	0	0	0	0	0	0	0	0	0	0	0	0	0	123.512	124.566	125.62	124.439	123.258	122.076	120.895	0	0	0	0	0	0	0	0	0	0	0	0	0	0	0	0	0	0	0	0	0	0	0	0	0	0
ROU	7.1	Road transport, light duty vehicles	1.44323	1.96022	1.48066	1.44263	1.41356	1.54065	1.5281	217.136	226.437	213.558	179.412	162.063	139.99	176.702	49.5732	49.3866	49.2	44.7848	40.3696	35.9544	31.5392	1.14796	1.20473	1.28846	1.25737	1.278	1.585	1.736	44.0348	45.0424	46.05	43.4232	40.7964	38.1696	35.5428	2.74843	2.48331	2.21819	2.04005	1.86191	1.68376	1.50562	2.74777	2.48285	2.21793	2.03979	1.86166
ROU	7.2	Road transport, heavy duty vehicles	0.132986	0.204676	0.173141	0.173369	0.175363	0.198426	0.205833	9.19864	9.59266	9.04704	7.60052	6.86553	5.93047	7.48569	3.026	3.338	3.65	3.3968	3.1448	2.8934	2.6412	0.0242527	0.025452	0.027221	0.0265641	0.027	0.031	0.058	30.9364	35.1732	39.41	38.375	37.34	36.3074	35.2732	1.25523	1.39317	1.53111	1.43587	1.34064	1.2454	1.15016	1.25523	1.39317	1.53111	1.43587	1.34064
ROU	7.3	Road transport, mopeds and motorcycles	0.25662	0.297312	0.185082	0.191505	0.200767	0.236261	0.25591	22.0929	23.0392	21.7287	18.2546	16.4893	14.2435	17.9788	18.9996	16.5648	14.13	13.592	13.054	12.516	11.978	0.000898247	0.000942666	0.00100818	0.000983855	0.001	0.001	0.001	0.5416	0.6258	0.71	0.7656	0.8212	0.8768	0.9324	0.364276	0.327093	0.28991	0.27967	0.26943	0.25919	0.24895	0.364276	0.327093	0.28991	0.27967	0.26943
ROU	7.4	Road transport, gasoline evaporation	0	0	0	0	0	0	0	0	0	0	0	0	0	0	27.9008	27.8254	27.75	25.1466	22.5432	19.9398	17.3364	0	0	0	0	0	0	0	0	0	0	0	0	0	0	0	0	0	0	0	0	0	0	0	0	0	0
ROU	7.5	Road transport, wear	0	0	0	0	0	0	0	0	0	0	0	0	0	0	0	0	0	0	0	0	0	0	0	0	0	0	0	0	0	0	0	0	0	0	0	1.14534	1.23931	1.33329	1.39929	1.46529	1.53129	1.59728	0.371207	0.411704	0.4522	0.475647	0.499094
ROU	8.1	Air transport (<1000m)	0.0001	9e-05	0.0001	8e-05	0.00038	1e-05	0.00029	21.2513	20.353	10.7625	9.7304	29.8809	55.3158	27.7357	0.0636	0.0618	0.06	0.072	0.084	0.096	0.108	0	0	0	0	0	0	0	0.0352	0.0326	0.03	0.039	0.048	0.057	0.066	0.00193	0.00188	0.00183	0.0021912	0.0025524	0.0029136	0.0032748	0.0017736	0.0017268	0.00168	0.002013	0.002346
ROU	8.2	Rail transport	0.07714	0.04334	0.02346	0.02271	0.17906	0.04688	0.02757	1.51548	1.45141	0.7675	0.693896	2.13087	3.94469	1.97789	1.218	0.879	0.54	0.527	0.514	0.501	0.488	0.00116772	0.00122547	0.00131064	0.00127901	0.0013	0	0.001	7.4628	5.3964	3.33	3.2502	3.1704	3.0906	3.0108	0.654278	0.472474	0.29067	0.282398	0.274126	0.265853	0.257581	0.619842	0.447606	0.27537	0.267533	0.259697
ROU	8.3	Navigation, non-international	0	0	0	0	0	0	0	25.4468	24.3711	12.8873	11.6514	35.7801	66.2365	33.2114	1.0257	1.05385	1.082	1.12556	1.16913	1.21269	1.25625	0.002	0.002	0.002	0.002	0.002	0.002	0.002	15.3273	16.0551	16.783	17.1615	17.5399	17.9184	18.2969	0.862477	0.943739	1.025	1.06257	1.10013	1.1377	1.17526	0.816971	0.893985	0.971	1.00662	1.04225
ROU	8.4	Mobile machinery, agriculture	0	0	0	0	0	0	0	3.10994	2.97847	1.575	1.42396	4.3728	8.09497	4.05887	1.2884	1.1992	1.11	1.044	0.978	0.912	0.846	0.000808422	0.000848399	0.000907366	0.000885469	0.0009	0.001	0.002	7.874	7.332	6.79	6.36	5.93	5.5	5.07	0.74998	0.69394	0.6379	0.596207	0.554514	0.51282	0.471127	0.710503	0.657412	0.60432	0.564823	0.525325
ROU	8.5	Mobile machinery, industry	0	0	0	0	0	0	0	1.39207	1.33322	0.705	0.63739	1.95735	3.62346	1.81683	1.002	1.066	1.13	1.1416	1.1532	1.1648	1.1764	0	0	0	0	0	0	0	6.0912	6.4706	6.85	6.8686	6.8872	6.9058	6.9244	0.529529	0.55608	0.58263	0.583261	0.583892	0.584523	0.585154	0.501656	0.526808	0.55196	0.552559	0.553158
ROU	8.6	Other mobile sources	0	0	0	0	0	0	0	16.7838	16.0743	8.5	7.68484	23.5993	43.6871	21.905	7.4428	7.1614	6.88	6.7154	6.5508	6.3862	6.2216	0	0	0	0	0	0	0	0.0116	0.0108	0.01	0.0108	0.0116	0.0124	0.0132	0.175523	0.172662	0.1698	0.163201	0.156603	0.150004	0.143406	0.161484	0.158852	0.15622	0.150148	0.144077
ROU	9.1	Landfills	241.996	229.023	256.432	252.765	242.43	255.125	264.529	0	0	0	0	0	0	0	0	0	0	0	0	0	0	0	0	0	0	0	0	0	0	0	0	0	0	0	0	0	0	0	0	0	0	0	0	0	0	0	0
ROU	9.2	Controlled waste incineration	0	0	0	0	0	0	0	0	0	0	0	0	0	0	0	0	0	0	0	0	0	0	0	0	0	0	0	0	0	0	0	0	0	0	0	0	0	0	0	0	0	0	0	0	0	0	0
ROU	9.3	Other waste treatment	32.0738	36.1604	38.6742	42.6047	43.499	42.914	42.4284	14.3647	14.6824	15	15.3176	15.6353	15.9529	16.2706	33.1384	32.9036	32.67	31.9612	31.2536	30.5454	29.8372	14.0976	14.7947	15.823	15.4412	15.6946	15.732	15.714	0.0512	0.0506	0.05	0.0506	0.0512	0.0518	0.0524	5.16272	5.14256	5.12239	5.11418	5.10597	5.09775	5.08954	4.97211	4.95195	4.93178	4.92357	4.91536
ROU	10.1	Livestock, Cattle	264.877	259.995	263.609	272.039	260.112	248.202	233.403	0	0	0	0	0	0	0	0	0	0	0	0	0	0	68.3835	71.7651	76.7531	74.9009	76.13	62.402	66.3413	0	0	0	0	0	0	0	0.809914	0.729637	0.64936	0.641751	0.634142	0.626534	0.618925	0.179974	0.162132	0.14429	0.142602	0.140913
ROU	10.2	Livestock, Poultry	1.37909	1.56626	1.55794	1.52983	1.47665	9.87164	9.80964	0	0	0	0	0	0	0	0	0	0	0	0	0	0	26.7695	28.0933	30.0459	29.3208	29.802	30.4	30.157	0	0	0	0	0	0	0	4.03908	4.29519	4.5513	4.54365	4.536	4.52835	4.5207	0.897572	0.954486	1.0114	1.0097	1.008
ROU	10.3	Livestock, Sheep	38.4265	38.3147	39.2725	39.6195	43.701	73.5395	75.6915	0	0	0	0	0	0	0	0	0	0	0	0	0	0	10.6505	11.1772	11.954	11.6656	11.857	12.434	12.798	0	0	0	0	0	0	0	0	0	0	0	0	0	0	0	0	0	0	0
ROU	10.4	Livestock, Goats	3.50526	3.4159	3.55058	3.76069	4.47241	4.65323	4.75163	0	0	0	0	0	0	0	0	0	0	0	0	0	0	1.08778	1.14157	1.22091	1.19145	1.211	1.258	1.284	0	0	0	0	0	0	0	0	0	0	0	0	0	0	0	0	0	0	0
ROU	10.5	Livestock, Pigs	41.16	51.9573	52.9784	54.5169	52.5193	52.4763	49.244	0	0	0	0	0	0	0	0	0	0	0	0	0	0	43.1257	45.2583	48.4039	47.2359	48.011	44.786	42.086	0	0	0	0	0	0	0	2.75729	2.82343	2.88957	2.77519	2.6608	2.54642	2.43204	0.490184	0.501942	0.5137	0.493366	0.473031
ROU	10.6	Livestock, Other animals	17.8864	16.7611	16.6616	16.0915	17.2113	16.7953	15.6904	0	0	0	0	0	0	0	0	0	0	0	0	0	0	11.4598	12.0265	12.8624	12.552	12.758	12.5582	11.751	0	0	0	0	0	0	0	0	0	0	0	0	0	0	0	0	0	0	0
ROU	10.7	Crops and pastures	0	0	0	0	0	0	0	0	0	0	0	0	0	0	0	0	0	0	0	0	0	3.86875	4.06006	4.34225	4.23746	4.307	4.398	4.641	0	0	0	0	0	0	0	0	0	0	0	0	0	0	0	0	0	0	0
ROU	10.8	Agricultural waste burning	20.509	20.509	20.509	20.509	20.509	20.509	20.509	120.868	223.105	189.6	156.946	90.8061	90.8061	124.254	26.6912	26.6906	26.69	26.6906	26.6912	26.6918	26.6924	4.102	4.102	4.102	4.102	4.102	4.102	4.102	0.6612	0.6606	0.66	0.6606	0.6612	0.6618	0.6624	22.4019	22.4019	22.4019	22.4019	22.4019	22.4019	22.4019	19.8778	19.8778	19.8778	19.8778	19.8778
ROU	10.9	Rice cultivation	0.0072	0.0864	0.2808	0.4032	0.6048	0.71402	1.33	0	0	0	0	0	0	0	0	0	0	0	0	0	0	0	0	0	0	0	0	0	0	0	0	0	0	0	0	0	0	0	0	0	0	0	0	0	0	0	0
ROU	10.10	Storage and handling of agricultural products	0	0	0	0	0	0	0	0	0	0	0	0	0	0	0	0	0	0	0	0	0	0	0	0	0	0	0	0	0	0	0	0	0	0	0	0.634452	0.608206	0.58196	0.581961	0.581961	0.581962	0.581962	0.107258	0.104974	0.10269	0.102692	0.102694
ROU	10.11	Other agriculture	0	0	0	0	0	0	0	0	0	0	0	0	0	0	0	0	0	0	0	0	0	0	0	0	0	0	0	0	0	0	0	0	0	0	0	7.94592	7.95251	7.9591	7.96079	7.96248	7.96417	7.96586	1.76576	1.76723	1.76869	1.76907	1.76944
SVK	1.1	Power plants	0.12169	0.11644	0.11533	0.1135	0.11382	0.12414	0.15146	2.42561	2.23019	2.466	2.484	2.4375	2.688	2.56058	0.214	0.203159	0.18528	0.173599	0.157537	0.172457	0.15707	0	0	0	0	0	0	0	17.289	15.507	15.203	12.657	11.2705	10.636	10.207	6.1541	5.993	9.6709	6.3618	0.86	0.8218	0.75865	5.873	5.781	9.3992	6.1683	0.7337
SVK	1.2	Refineries	0.11118	0.13869	0.09682	0.09167	0.09446	0.12326	0.12086	0.498574	0.660482	0.5375	0.577	0.492225	0.455	0.483778	4.672	4.61659	4.05796	3.46914	3.1656	2.80357	2.62338	0	0	0	0	0	0	0	1.463	1.555	1.145	1.141	1.10184	1.039	1.08111	0.094	0.08	0.0754	0.0785	0.089	0.0606	0.0659689	0.0019	0.0016	0.0015	0.0016	0.0019
SVK	2.1	Residential combustion (including commercial/institutional)	7.55446	8.38649	10.7253	10.1852	8.64282	15.5002	6.99021	36.4509	36.8325	43.5685	42.501	38.3066	38.712	37.304	7.498	8.924	11.9246	11.1542	11.1073	11.1675	11.2677	0.061	0.066	0.062	0.068	0.0704043	0.066	0.0666236	8.942	9.125	10.321	9.665	8.90166	9.209	9.13074	17.0752	20.1992	27.1051	25.3176	25.2405	25.3595	25.3102	14.565	17.8274	24.4141	22.6397	23.0096
SVK	2.2	Agricultural stationary combustion	0.0567	0.04609	0.05792	0.03378	0.02637	0.03006	0.03746	0.315882	0.283278	0.20928	0.179	0.158989	0.158	0.144065	0.007	0.007406	0.008805	0.007783	0.006276	0.006374	0.006367	0	0	0	0	0	0	0	0.153	0.173	0.149	0.159	0.113354	0.122	0.108883	0.1092	0.099	0.126	0.1099	0.09	0.1056	0.0936102	0.048	0.0443	0.0459	0.0387	0.0374
SVK	34.1	Iron and steel industry (including coke ovens)	0.41041	0.39649	0.39285	0.41899	0.36529	0.33609	0.28251	105.546	108.779	95.5146	111.914	104.42	93.325	67.6386	1.624	1.60606	1.58279	1.62247	1.60463	1.47788	1.02041	0.085	0.087	0.065	0.033	0.0340194	0.034	0.0278811	9.804	8.812	8.555	10.262	7.94042	6.619	5.71311	7.2235	1.71	2.9762	3.0753	2.53	2.2298	2.06881	4.813	1.3028	1.0859	0.9303	0.7121
SVK	34.2	Non-ferrous metal industry	0.01944	0.01569	0.01442	0.01414	0.01522	0.01601	0.01483	12.077	13.6778	13.5779	13.512	13.3016	16.383	16.8268	0.0912	0.195587	0.267767	0.353373	0.38466	0.420084	0.33192	0.0002	0.0004	0.0002	0.0002	0.000547702	0.001	0.00459082	0.718	0.786	0.955	0.82	0.800906	0.769	0.733289	0.1328	0.014	0.1644	0.1256	0.119	0.1694	0.155355	0.025	0.006	0.0247	0.022	0.021
SVK	34.3	Chemical industry	1.21818	1.39011	1.44879	1.21232	1.28082	1.1673	1.17212	1.28568	1.22057	1.39982	1.534	0.804614	0.862	0.751961	0.941	0.969971	0.869825	0.845462	0.793193	0.667023	0.608702	0.365279	0.319	0.23	0.153	0.200404	0.105	0.0912444	3.963	3.95	3.721	3.917	3.34581	3.059	2.99344	0.5514	0.214	0.4751	0.4128	0.236	0.2519	0.276744	0.402	0.1909	0.3945	0.3432	0.197
SVK	34.4	Paper and pulp industry	0.0785	0.06717	0.07137	0.07113	0.06408	0.05813	0.06892	2.46601	1.97531	1.7223	1.656	1.13254	2.415	1.05695	0	0	0	0	0	0	0	0	0	0	0	0.00109283	0.001	0.00381202	2.62	2.375	2.397	2.162	1.84688	1.902	2.3725	0.3281	0.0941	0.41828	0.326	0.101	0.1034	0.17294	0.115002	0.079701	0.126504	0.09592	0.0554
SVK	34.5	Cement industry	0	0	0	0	0	0	0	0	0	0	0	0	0	0	0	0	0	0	0	0	0	0	0	0	0	0	0	0	0	0	0	0	0	0	0	0	0	0	0	0	0	0	0	0	0	0	0
SVK	34.6	Other non-metallic minerals industry	0	0	0	0	0	0	0	0	0	0	0	0	0	0	0.001	0.000486	0.000743	0.00054285	0.00076	0.000814	0.000778085	0	0	0	0	0	0	0	0	0	0	0	0	0	0	0.2541	0.015	0.3157	0.345	0.3	0.3119	0.242032	0.003	0.0002	0.0036	0.0039	0.0034
SVK	34.7	Storage and handling in industry	0	0	0	0	0	0	0	0	0	0	0	0	0	0	0	0	0	0	0	0	0	0	0	0	0	0	0	0	0	0	0	0	0	0	0	0	0	0	0	0	0	0	0	0	0	0	0
SVK	34.8	Other industries	0.36844	0.3308	0.31886	0.31332	0.33497	0.29854	0.25757	22.8393	23.5659	22.052	18.977	22.0991	23.13	19.9735	0.526	0.465734	0.46095	0.428043	0.405791	0.41636	0.414028	0.0164	0.017	0.022	0.019	0.0245533	0.0202	0.0192942	10.302	9.952	9.387	8.976	8.88461	9.1746	7.78642	2.2607	0.718	1.7522	1.5062	1.388	1.1102	1.21289	0.571	0.4536	0.4582	0.4843	0.4221
SVK	5.1	Coal production	21.114	19.7726	16.1726	14.6709	13.5181	15.9487	16.924	0	0	0	0	0	0	0	0	0	0	0	0	0	0	0	0	0	0	0	0	0	0	0	0	0	0	0	0	0	0	0	0	0	0	0	0	0	0	0	0
SVK	5.2	Oil production	6.52781	5.51842	4.30491	4.30569	4.63083	4.94122	5.45567	0	0	0	0	0	0	0	3.999	4.14917	4.28065	4.47237	4.26595	4.27182	4.324	0	0	0	0	0	0	0	0	0	0	0	0	0	0	0	0	0	0	0	0	0	0	0	0	0	0
SVK	5.3	Gas production	53.6798	51.2575	45.9266	44.5946	46.5918	48.3232	51.8905	0.347034	0.376351	0.3585	0.216	0.257129	0.29	0.179976	0	0	0	0	0	0	0	0	0	0	0	0	0	0	3.327	4.517	3.835	2.607	2.91648	3.513	2.58501	0	0	0	0	0	0	0	0	0	0	0	0
SVK	5.4	Gasoline distribution	0	0	0	0	0	0	0	0	0	0	0	0	0	0	3.432	3.54731	2.82429	1.80385	1.90424	2.0905	1.88258	0	0	0	0	0	0	0	0	0	0	0	0	0	0	0	0	0	0	0	0	0	0	0	0	0	0
SVK	5.5	Flaring	0	0	0	0	0	0	0	0	0	0	0	0	0	0	0	0	0	0	0	0	0	0	0	0	0	0	0	0	0	0	0	0	0	0	0	0	0	0	0	0	0	0	0	0	0	0	0
SVK	6.1	Solvent and other product use	0	0	0	0	0	0	0	0	0	0	0	0	0	0	32.272	32.7596	33.5612	34.6342	33.5791	33.9637	33.3296	0	0	0	0	0	0	0	0	0	0	0	0	0	0	0	0	0	0	0	0	0	0	0	0	0	0
SVK	7.1	Road transport, light duty vehicles	0.575019	0.550273	0.551071	0.430116	0.451063	0.466085	0.437122	101.586	97.3419	88.7636	64.7698	53.6362	53.7883	51.7854	12.7901	10.9403	11.1373	7.24601	6.8761	6.79227	6.11788	0.345327	0.303347	0.382684	0.382175	0.380126	0.582937	0.449721	13.9337	12.4297	11.6532	10.0289	9.77056	9.05917	8.51146	0.735824	0.763829	0.926069	1.12207	0.938623	0.653662	0.645052	0.57316	0.65029	0.791884	0.995565	0.811823
SVK	7.2	Road transport, heavy duty vehicles	0.117937	0.120747	0.129664	0.0965782	0.0959955	0.0930296	0.0810395	4.14315	5.81984	6.72846	5.87339	7.82064	7.28345	5.97291	1.75879	1.98798	2.15966	1.87419	2.68574	2.33633	1.71398	0.004962	0.007915	0.009761	0.00876171	0.011544	0.013325	0.011663	19.1483	25.9699	31.4573	31.4132	34.5147	34.9768	30.5115	0.852542	1.16211	1.36013	1.17405	1.49516	1.31751	1.11294	0.753316	1.05423	1.23282	1.06451	1.34912
SVK	7.3	Road transport, mopeds and motorcycles	0.102355	0.105231	0.113456	0.0936756	0.104091	0.113946	0.113578	1.93592	1.71359	1.9895	2.33909	2.01467	1.63143	1.03817	1.07111	1.00407	1.1736	1.16647	1.01513	0.849882	0.425632	0.000177904	0.000172019	0.000163856	0.000199931	0.000142029	0.000197708	0.000100924	0.0142577	0.0122157	0.0160387	0.0162732	0.0152962	0.0161761	0.00901136	0.0215376	0.0226956	0.0229804	0.0230765	0.0200262	0.0185291	0.00889519	0.0208393	0.0220361	0.0221453	0.0223704	0.0194004
SVK	7.4	Road transport, gasoline evaporation	0	0	0	0	0	0	0	0	0	0	0	0	0	0	0	0	0	0	0	0	0	0	0	0	0	0	0	0	0	0	0	0	0	0	0	0	0	0	0	0	0	0	0	0	0	0	0
SVK	7.5	Road transport, wear	0	0	0	0	0	0	0	0	0	0	0	0	0	0	0	0	0	0	0	0	0	0	0	0	0	0	0	0	0	0	0	0	0	0	0	0.6845	0.7277	0.8753	1.0845	0.943	0.9215	0.9235	0.366	0.3887	0.4671	0.5775	0.499
SVK	8.1	Air transport (<1000m)	0.00088	0.00095	0.00111	0.0012	0.00132	0.00139	0.00068	0.5718	0.57978	0.595	0.549	0.576	0.576	0.5675	0.07938	0.07268	0.074	0.0633	0.079	0.084	0.07019	0	0	0	0	0	0	0	0.0706	0.09248	0.1134	0.136	0.141	0.159	0.12852	0.0069	0.009	0.009	0.01	0.01	0.012	0.00872	0.0069	0.009	0.009	0.01	0.01
SVK	8.2	Rail transport	0.0068	0.00652	0.006	0.00675	0.00648	0.00594	0.00512	0.4296	0.412	0.4012	0.426	0.4081	0.4081	0.3234	0.183297	0.17578	0.171	0.18186	0.174	0.16	0.137965	0.0003	0.00027	0.00026	0.0003	0.00027	0.0002441	0.0002102	2.041	1.957	1.9058	2.025	1.943	1.783	1.5359	0.1473	0.13742	0.13742	0.14599	0.141	0.128	0.11075	0.1395	0.1304	0.1304	0.1385	0.13294
SVK	8.3	Navigation, non-international	0	0	0	0	0	0	0	0.0180248	0.0201794	0.022209	0.0186181	0.0193207	0.0193207	0.0183371	0.0797983	0.0819555	0.084	0.0803945	0.0829033	0.0810754	0.0801092	0	0	0	0	0	0	0	2.68578	2.72817	2.768	2.69741	2.74654	2.71115	2.6918	0.17144	0.177	0.177	0.172215	0.175547	0.173066	0.171834	0.162686	0.168	0.168	0.163447	0.16662
SVK	8.4	Mobile machinery, agriculture	0	0	0	0	0	0	0	0	0	0	0	0	0	0	0	0	0	0	0	0	0	0	0	0	0	0	0	0	0	0	0	0	0	0	0	0	0	0	0	0	0	0	0	0	0	0	0
SVK	8.5	Mobile machinery, industry	0	0	0	0	0	0	0	0	0	0	0	0	0	0	0	0	0	0	0	0	0	0	0	0	0	0	0	0	0	0	0	0	0	0	0	0	0	0	0	0	0	0	0	0	0	0	0
SVK	8.6	Other mobile sources	0	0	0	0	0	0	0	0	0	0	0	0	0	0	0	0	0	0	0	0	0	0	0	0	0	0	0	0	0	0	0	0	0	0	0	0	0	0	0	0	0	0	0	0	0	0	0
SVK	9.1	Landfills	84.59	89.32	82.67	88.26	84.45	84.8	75.45	0	0	0	0	0	0	0	0.006	0.006739	0.005082	0.008685	0.006872	0.005658	0.005041	0	0	0	0	0	0	0	0	0	0	0	0	0	0	0	0	0	0	0	0	0	0	0	0	0	0
SVK	9.2	Controlled waste incineration	0	0	0	0	0	0	0	0	0	0	0	0	0	0	0.753	0.4319	0.5379	0.5007	0.3745	0.6074	0.3255	0	0	0	0	0	0	0	0	0	0	0	0	0	0	0	0	0	0	0	0	0	0	0	0	0	0
SVK	9.3	Other waste treatment	23.313	20.144	20.477	21.449	20.382	20.497	20.0877	0	0	0	0	0	0	0	0	0	0	0	0	0	0	0	0	0	0	0	0	0	0	0	0	0	0	0	0	0	0	0	0	0	0	0	0	0	0	0	0
SVK	10.1	Livestock, Cattle	44.8378	41.6823	42.3842	41.5226	41.3289	40.0332	37.9202	0	0	0	0	0	0	0	0	0	0	0	0	0	0	13.62	12.558	12.478	12.157	12.169	11.943	11.6123	0	0	0	0	0	0	0	0	0	0	0	0	0	0	0	0	0	0	0
SVK	10.2	Livestock, Poultry	1.10892	1.06963	1.09856	1.01699	1.005	0.87579	1.0595	0	0	0	0	0	0	0	0	0	0	0	0	0	0	4.66331	4.47717	4.57796	4.33544	4.30061	3.76633	4.46763	0	0	0	0	0	0	0	0	0	0	0	0	0	0	0	0	0	0	0
SVK	10.3	Livestock, Sheep	2.66602	3.2571	3.24904	3.31029	3.43904	3.60556	3.76847	0	0	0	0	0	0	0	0	0	0	0	0	0	0	0.922	0.91	0.908	0.942	0.983	1.024	1.0679	0	0	0	0	0	0	0	0	0	0	0	0	0	0	0	0	0	0	0
SVK	10.4	Livestock, Goats	0.20084	0.19974	0.20258	0.19636	0.19391	0.18989	0.18273	0	0	0	0	0	0	0	0	0	0	0	0	0	0	0.111	0.111	0.112	0.109	0.107	0.105	0.101091	0	0	0	0	0	0	0	0	0	0	0	0	0	0	0	0	0	0	0
SVK	10.5	Livestock, Pigs	7.93657	6.32105	6.09546	6.07656	5.236	4.11683	4.07474	0	0	0	0	0	0	0	0	0	0	0	0	0	0	7.37505	5.946	5.66339	4.82389	4.219	3.215	3.27332	0	0	0	0	0	0	0	0	0	0	0	0	0	0	0	0	0	0	0
SVK	10.6	Livestock, Other animals	0.15741	0.15925	0.16156	0.15951	0.15553	0.16337	0.13966	0	0	0	0	0	0	0	0	0	0	0	0	0	0	0.042	0.043	0.043	0.043	0.042	0.044	0.037292	0	0	0	0	0	0	0	0	0	0	0	0	0	0	0	0	0	0	0
SVK	10.7	Crops and pastures	0	0	0	0	0	0	0	0	0	0	0	0	0	0	0	0	0	0	0	0	0	3.99	3.921	3.99	3.861	4.364	4.305	3.78136	0	0	0	0	0	0	0	0	0	0	0	0	0	0	0	0	0	0	0
SVK	10.8	Agricultural waste burning	0.455	0.455	0.455	0.455	0.455	0.455	0.455	0.00300669	0.00448219	0.0042	0.0035066	0.00338625	0.00338625	0.00369709	0.5912	0.5906	0.59	0.5906	0.5912	0.5918	0.5924	0.0904	0.0902	0.09	0.0902	0.0904	0.0906	0.0908	0.0924	0.0912	0.09	0.0912	0.0924	0.0936	0.0948	0.49751	0.49751	0.49751	0.49751	0.49751	0.497511	0.497511	0.441452	0.441451	0.44145	0.441451	0.441452
SVK	10.9	Rice cultivation	0	0	0	0	0	0	0	0	0	0	0	0	0	0	0	0	0	0	0	0	0	0	0	0	0	0	0	0	0	0	0	0	0	0	0	0	0	0	0	0	0	0	0	0	0	0	0
SVK	10.10	Storage and handling of agricultural products	0	0	0	0	0	0	0	0	0	0	0	0	0	0	0	0	0	0	0	0	0	0	0	0	0	0	0	0	0	0	0	0	0	0	0	0	0	0	0	0	0	0	0	0	0	0	0
SVK	10.11	Other agriculture	0	0	0	0	0	0	0	0	0	0	0	0	0	0	0.436	0.436	0.436	0.436	0.43748	0.438393	0.439419	0	0	0	0	0	0	0	0	0	0	0	0	0	0	0	0	0	0	0	0	0	0	0	0	0	0
SVN	1.1	Power plants	0.06892	0.06923	0.08377	0.08853	0.08903	0.14356	0.10855	1.50696	1.7025	1.35086	1.32861	1.80314	2.10679	1.74792	0.106814	0.10703	0.10972	0.111744	0.115539	0.127392	0.11581	0	0	0	0	0	0	0	14.9743	12.9104	12.811	12.9538	11.8898	12.1058	10.889	0.698661	0.672489	0.594906	0.244834	0.280779	0.404944	0.34387	0.33335	0.317859	0.286863	0.12355	0.143588
SVN	1.2	Refineries	0.00037	3e-05	5e-05	0.00074	1e-05	3e-05	0.00055	0.000925481	6.704e-05	9.12635e-05	0.00565211	1.81101e-05	4.9203e-05	0.00270084	0.437248	0.458811	0.480715	0.522922	0.523703	0.645108	0.55337	0	0	0	0	0	0	0	0.0259135	0.00187712	0.00136576	0.0154386	0.000483221	0.00050694	0.00756235	0.00333173	0.000241344	0.000328549	0.000266259	6.53808e-05	0.000177315	0.000107917	0.00240625	0.000174304	0.000237285	0.000228225	4.71785e-05
SVN	2.1	Residential combustion (including commercial/institutional)	4.47382	4.43738	4.36934	4.32109	4.26025	4.30721	4.30035	74.7523	74.2378	73.5806	73.1275	72.8704	73.069	71.2428	8.73854	8.67693	8.58534	8.5159	8.43831	8.4936	8.27656	0	0	0	0	0	0	0	3.75478	3.69897	3.41336	3.13804	2.65097	3.08887	2.9845	9.83871	9.78533	9.7201	9.67115	9.61504	9.68375	9.67155	9.78799	9.73723	9.67534	9.6298	9.58354
SVN	2.2	Agricultural stationary combustion	0.02833	0.02667	0.0269	0.02719	0.02682	0.02765	0.02411	0	0	0	0	0	0	0	0	0	0	0	0	0	0	0	0	0	0	0	0	0	0	0	0	0	0	0	0	0	0	0	0	0	0	0	0	0	0	0	0
SVN	34.1	Iron and steel industry (including coke ovens)	0.02334	0.01715	0.01863	0.01927	0.01822	0.01921	0.01381	0.3316	0.285844	0.300736	0.395497	0.334909	0.361155	0.199169	0.0347245	0.0281462	0.0299338	0.0393139	0.0333397	0.0360437	0.0204382	0	5.28e-07	8e-07	9.68e-07	1.248e-06	2.232e-06	1.648e-06	0.366363	0.257209	0.279151	0.296119	0.276118	0.300511	0.211186	0.0382542	0.0297158	0.0315666	0.0445283	0.0362971	0.0396027	0.0209604	0.0339961	0.0272523	0.0288361	0.0406352	0.0332117
SVN	34.2	Non-ferrous metal industry	0.00401	0.00419	0.00444	0.00479	0.00622	0.00714	0.00866	0.0268293	0.0273713	0.0295515	0.032521	0.040505	0.105209	0.101452	0.00403895	0.00402575	0.00443126	0.00497091	0.00596627	0.0127055	0.0122648	0	1.12e-07	1.76e-07	1.76e-07	7.2e-07	5.36e-07	6.64e-07	0.0724101	0.0741659	0.0799548	0.0877838	0.110248	0.131812	0.151399	2.15386	1.90664	1.71388	2.71423	2.35209	0.049534	0.0398155	0.947692	0.83956	0.755154	1.19384	1.03359
SVN	34.3	Chemical industry	0.32869	0.27784	0.31705	0.2853	0.32597	0.21084	0.23697	0.683672	0.892096	1.00019	0.958061	0.933888	0.905567	1.1306	0.0653746	0.0862501	0.096196	0.0903524	0.0919869	0.0867151	0.107143	0	2.408e-06	2.424e-06	2.336e-06	9.208e-06	2e-06	2.224e-06	0.290817	0.339634	0.307064	0.271728	0.334879	0.295567	0.321427	0.0646689	0.0873192	0.0991702	0.0897798	0.0930392	0.0879867	0.108017	0.0627377	0.0844825	0.0961421	0.0883049	0.0902034
SVN	34.4	Paper and pulp industry	0.10218	0.11767	0.12242	0.08482	0.04495	0.04868	0.04576	5.00829	2.78342	2.99769	2.44988	1.79836	1.5328	1.52577	0.470061	0.675816	0.70256	0.46144	0.401112	0.213306	0.292431	0	1.776e-06	2.856e-06	2.608e-06	2.2e-06	2e-06	3.384e-06	0.96955	0.823052	0.922653	0.715692	0.674459	0.62257	0.604201	0.523018	0.314544	0.348544	0.274909	0.209642	0.177621	0.189619	0.50314	0.295314	0.325287	0.258435	0.194398
SVN	34.5	Cement industry	0	0	0	0	0	0	0	0	0	0	0	0	0	0	0	0	0	0	0	0	0	0	0	0	0	0	0	0.052302	0	0	0	0	0	0	0	0.170767	0.178312	0.147472	0.155498	0.127168	0.112476	0.0801362	0.0939221	0.0980718	0.0829529	0.0874676	0.0684751
SVN	34.6	Other non-metallic minerals industry	0	0	0	0	0	0	0	0	0	0	0	0	0	0	0.376552	0.464784	0.389842	0.571526	0.504942	0.619459	0.4719	0	0	0	0	0	0	0	0	0	0	0	0	0	0	0.0286139	0.02819	0.0396298	0.0427632	0.0402367	0.0339067	0.0235128	0.00596122	0.00587291	0.0082562	0.008909	0.00838265
SVN	34.7	Storage and handling in industry	0	0	0	0	0	0	0	0	0	0	0	0	0	0	0	0	0	0	0	0	0	0	0	0	0	0	0	0.0565484	0	0	0	0	0	0	0	0.0405796	0.041514	0.0420086	0.0442011	0.0458866	0.0243689	0.0636023	0.035932	0.0367516	0.0371867	0.0391161	0.0405993
SVN	34.8	Other industries	0.1653	0.16547	0.19107	0.21142	0.20491	0.19822	0.15945	6.02272	6.21158	7.00188	3.71999	8.35322	8.04673	6.1658	1.01426	1.0713	1.12773	0.77025	1.27807	1.23228	0.949248	0	6.3672e-05	7.3472e-05	1.8688e-05	0.00010624	6.7784e-05	5.7808e-05	1.78115	2.17317	2.46408	1.38127	2.60458	2.36383	1.81482	0.685329	0.728804	0.822374	0.489659	0.935693	0.905602	0.619586	0.643839	0.682027	0.769407	0.445398	0.886772
SVN	5.1	Coal production	12.9431	12.8883	12.166	12.1181	12.1168	12.1145	11.8692	0	0	0	0	0	0	0	0	0	0	0	0	0	0	0	0	0	0	0	0	0	0	0	0	0	0	0	0	0.120737	0.113486	0.113486	0.1161	0.116761	0.112292	0.107016	0.0183521	0.0172499	0.0172499	0.0176	0.0177477
SVN	5.2	Oil production	0	0	0	0	0	0	0	0	0	0	0	0	0	0	0	0	0	0	0	0	0	0	0	0	0	0	0	0	0	0	0	0	0	0	0	0	0	0	0	0	0	0	0	0	0	0	0
SVN	5.3	Gas production	14.6884	14.4855	13.7369	13.6382	13.6055	13.5806	13.2654	0	0	0	0	0	0	0	0	0	0	0	0	0	0	0	0	0	0	0	0	0	0	0	0	0	0	0	0	0	0	0	0	0	0	0	0	0	0	0	0
SVN	5.4	Gasoline distribution	0	0	0	0	0	0	0	0	0	0	0	0	0	0	2.9312	2.6179	2.1549	2.1136	2.0456	2.1422	1.9697	0	0	0	0	0	0	0	0	0	0	0	0	0	0	0	0	0	0	0	0	0	0	0	0	0	0
SVN	5.5	Flaring	0	0	0	0	0	0	0	0	0	0	0	0	0	0	0	0	0	0	0	0	0	0	0	0	0	0	0	0	0	0	0	0	0	0	0	0	0	0	0	0	0	0	0	0	0	0	0
SVN	6.1	Solvent and other product use	0	0	0	0	0	0	0	0	0	0	0	0	0	0	14.5322	15.8458	14.9401	15.5725	14.7698	12.809	12.4466	0	0	0	0	0	0	0	0	0	0	0	0	0	0	0	0	0	0	0	0	0	0	0	0	0	0
SVN	7.1	Road transport, light duty vehicles	0.807988	0.693882	0.626307	0.563416	0.517822	0.507724	0.426349	77.4308	65.0636	59.8109	50.8429	43.6971	43.0634	36.3654	8.67938	7.16121	6.51768	5.521	4.72007	4.55566	3.76813	0.860391	0.782353	0.771624	0.752591	0.717655	0.724924	0.476177	11.2747	10.2138	11.6089	11.3557	11.952	13.7248	11.269	0.42285	0.472549	0.72564	0.716471	0.775609	0.923107	0.714355	0.42285	0.472549	0.72564	0.716471	0.775609
SVN	7.2	Road transport, heavy duty vehicles	0.0395545	0.0331218	0.0289065	0.0257145	0.0244889	0.0244183	0.020954	3.15501	3.31207	2.28485	2.29068	2.57364	2.8232	2.30224	0.779012	0.825033	0.580651	0.560035	0.609727	0.650138	0.550061	0.00510699	0.00604917	0.00413937	0.00465436	0.00600984	0.00755125	0.00484481	11.6291	13.4931	10.5107	10.8374	13.1106	15.3758	12.9332	0.377472	0.415078	0.302677	0.288438	0.319451	0.346909	0.281418	0.377472	0.415078	0.302677	0.288438	0.319451
SVN	7.3	Road transport, mopeds and motorcycles	0.0303379	0.0286559	0.0289065	0.0282092	0.0284388	0.0310178	0.0295066	1.8865	1.69581	1.87586	2.00504	2.004	2.05471	2.05858	0.651867	0.514277	0.586193	0.577049	0.567272	0.590949	0.59551	0.000195692	0.000187438	0.000215228	0.00024673	0.000269646	0.000287718	0.00022912	0.0230545	0.0246764	0.0297995	0.036675	0.0438125	0.0494302	0.0487769	0.0103326	0.00836606	0.0095488	0.00958182	0.00959648	0.0101113	0.0100013	0.0103326	0.00836606	0.0095488	0.00958182	0.00959648
SVN	7.4	Road transport, gasoline evaporation	0	0	0	0	0	0	0	0	0	0	0	0	0	0	1.13973	0.77262	0.66013	0.55087	0.48906	0.43377	0.536874	0	0	0	0	0	0	0	0	0	0	0	0	0	0	0	0	0	0	0	0	0	0	0	0	0	0
SVN	7.5	Road transport, wear	0	0	0	0	0	0	0	0	0	0	0	0	0	0	0	0	0	0	0	0	0	0	0	0	0	0	0	0	0	0	0	0	0	0	0	0.516042	0.542417	0.543781	0.57926	0.664951	0.792104	0.69185	0.278146	0.292304	0.293305	0.312422	0.358588
SVN	8.1	Air transport (<1000m)	3e-05	3e-05	2e-05	2e-05	2e-05	2e-05	2e-05	1.23212	0.961671	0.897618	0.86437	1.02804	0.95334	0.618555	0.0275953	0.0213892	0.0208206	0.0212056	0.0260639	0.0255368	0.010127	0	0	0	0	0	0	0	0.217416	0.165766	0.177304	0.201237	0.261578	0.278621	0.0108512	0	0	0	0	0	0	0	0	0	0	0	0
SVN	8.2	Rail transport	0.002	0.00203	0.00205	0.00204	0.00204	0.00222	0.00204	0.495895	0.463768	0.1284	0.1284	0.1284	0.1391	0.1284	0.0538423	0.0546561	0.0558	0.0558	0.0558	0.06045	0.0558	0	0	0	0	0	0	0	0.62534	0.63281	0.6288	0.6288	0.6288	0.6812	0.6288	0.0166738	0.0169258	0.01728	0.01728	0.01728	0.01872	0.01728	0.0158632	0.016103	0.01644	0.01644	0.01644
SVN	8.3	Navigation, non-international	0	0	0	0	0	0	0	0	0	0	0	0	0	0	0	0	0	0	0	0	0	0	0	0	0	0	0	0	0	0	0	0	0	0	0	0	0	0	0	0	0	0	0	0	0	0	0
SVN	8.4	Mobile machinery, agriculture	0	0	0	0	0	0	0	0.786658	0.745283	0.757394	0.764636	0.759418	0.780304	0.671151	0.24206	0.229328	0.233055	0.235283	0.233678	0.240104	0.206518	0.000575305	0.000545047	0.000553904	0.0005592	0.000555384	0.000570658	0.000490832	2.52005	2.38751	2.42631	2.44951	2.43279	2.4997	2.15003	0.124985	0.118411	0.120336	0.121486	0.120657	0.123975	0.106633	0.124985	0.118411	0.120336	0.121486	0.120657
SVN	8.5	Mobile machinery, industry	0	0	0	0	0	0	0	0.327268	0.359487	0.338043	0.535843	0.379334	0.467158	0.370274	0.10332	0.113492	0.106722	0.169169	0.119758	0.147484	0.116898	0.000244184	0.000268224	0.000252224	0.000399808	0.000283032	0.00034856	0.000276272	1.00091	1.09945	1.03387	1.63881	1.16015	1.42875	1.13244	0.063671	0.0699394	0.0657674	0.10425	0.0738006	0.090887	0.0722472	0.063671	0.0699394	0.0657674	0.10425	0.0738006
SVN	8.6	Other mobile sources	0	0	0	0	0	5e-05	5e-05	0	0	0	0	0	0	0	0	0	0	0	0	0	0	0	0	0	0	0	0	0	0	0	0	0	0	0	0	0	0	0	0	0	0	0	0	0	0	0	0
SVN	9.1	Landfills	22.4237	22.984	23.1644	22.6822	21.5882	19.0358	17.2029	0	0	0	0	0	0	0	0	0	0	0	0	0	0	0	0	0	0	0	0	0	0	0	0	0	0	0	0	0.00933757	0.00933757	0.00931164	0.0112003	0.0104813	0.0102402	0.00933757	0.00293873	0.00293873	0.00293057	0.00352497	0.00329868
SVN	9.2	Controlled waste incineration	0	0	0	0	0	0	0	0	0	0	0	0	0	0	0	0	0	0	0	0	0	0	0	0	0	0	0	0	0	0	0	0	0	0	0	0	0	0	0	0	0	0	0	0	0	0	0
SVN	9.3	Other waste treatment	8.48507	7.59957	7.89539	9.1471	8.4269	7.46681	7.58824	0	0	0	0	0	0	0	0	0	0	0	0	0	0	0	0	0	0	0	0	0	0	0	0	0	0	0	0	0	0	0	0	0	0	0	0	0	0	0	0
SVN	10.1	Livestock, Cattle	41.3741	41.0383	41.4495	41.7222	44.1833	43.7666	43.8902	0	0	0	0	0	0	0	0	0	0	0	0	0	0	10.1808	10.0678	10.1838	10.1833	10.6912	10.5563	10.495	0	0	0	0	0	0	0	0.179456	0.179818	0.180369	0.180973	0.191156	0.187317	0.188489	0.039836	0.0399165	0.0400387	0.0401728	0.0424333
SVN	10.2	Livestock, Poultry	0.35363	0.25491	0.2478	0.23842	0.35559	0.35687	0.40653	0	0	0	0	0	0	0	0	0	0	0	0	0	0	1.63061	1.1799	1.17397	1.12722	1.60553	1.60463	1.76904	0	0	0	0	0	0	0	0.218822	0.154756	0.151237	0.140683	0.207421	0.204786	0.217611	0.0485656	0.0343467	0.0335655	0.0312229	0.0460345
SVN	10.3	Livestock, Sheep	0.86536	0.97677	1.0594	1.07721	1.07436	1.13806	1.1311	0	0	0	0	0	0	0	0	0	0	0	0	0	0	0.165602	0.193706	0.205899	0.204643	0.208501	0.218118	0.218708	0	0	0	0	0	0	0	0	0	0	0	0	0	0	0	0	0	0	0
SVN	10.4	Livestock, Goats	0.11925	0.11792	0.13046	0.14233	0.14453	0.12405	0.15307	0	0	0	0	0	0	0	0	0	0	0	0	0	0	0.0668319	0.0632602	0.0701007	0.0795177	0.0747502	0.06623	0.086075	0	0	0	0	0	0	0	0	0	0	0	0	0	0	0	0	0	0	0
SVN	10.5	Livestock, Pigs	9.95724	8.57773	8.80242	8.99133	8.48623	6.72113	6.60416	0	0	0	0	0	0	0	0	0	0	0	0	0	0	3.78114	3.2404	3.32619	3.53859	3.28929	2.65189	2.60465	0	0	0	0	0	0	0	0.219349	0.188768	0.193517	0.203304	0.191806	0.152716	0.146784	0.0487097	0.0419188	0.0429734	0.0451466	0.0425933
SVN	10.6	Livestock, Other animals	0.32745	0.32745	0.32745	0.32745	0.38068	0.38068	0.38068	0	0	0	0	0	0	0	0	0	0	0	0	0	0	0.202104	0.202104	0.202104	0.202104	0.234959	0.234959	0.234959	0	0	0	0	0	0	0	0.00303822	0.00303822	0.00303822	0.00303822	0.00353214	0.00353214	0.00353214	0.00202548	0.00202548	0.00202548	0.00202548	0.00235476
SVN	10.7	Crops and pastures	0	0	0	0	0	0	0	0	0	0	0	0	0	0	0	0	0	0	0	0	0	1.94598	1.76089	1.71892	1.78318	1.75818	1.54277	1.69891	0	0	0	0	0	0	0	0	0	0	0	0	0	0	0	0	0	0	0
SVN	10.8	Agricultural waste burning	0.491	0.491	0.491	0.491	0.491	0.491	0.491	0.00362765	0.00485591	0.0048	0.00433701	0.00449688	0.00449688	0.0045302	0.6336	0.6318	0.63	0.6318	0.6336	0.6354	0.6372	0.0932	0.0916	0.09	0.0916	0.0932	0.0948	0.0964	0.1012	0.1006	0.1	0.1006	0.1012	0.1018	0.1024	0.53605	0.53605	0.53605	0.53605	0.53605	0.53605	0.53605	0.47565	0.47565	0.47565	0.47565	0.47565
SVN	10.9	Rice cultivation	0	0	0	0	0	0	0	0	0	0	0	0	0	0	0	0	0	0	0	0	0	0	0	0	0	0	0	0	0	0	0	0	0	0	0	0	0	0	0	0	0	0	0	0	0	0	0
SVN	10.10	Storage and handling of agricultural products	0	0	0	0	0	0	0	0	0	0	0	0	0	0	0	0	0	0	0	0	0	0	0	0	0	0	0	0	0	0	0	0	0	0	0	0	0	0	0	0	0	0	0	0	0	0	0
SVN	10.11	Other agriculture	0	0	0	0	0	0	0	0	0	0	0	0	0	0	0	0	0	0	0	0	0	0	0	0	0	0	0	0	0	0	0	0	0	0	0	1.63687	2.21393	2.5321	1.92757	2.00962	2.06232	2.06268	0.180927	0.245836	0.281118	0.213749	0.223549
ALB	1.1	Power plants	0.0032	0.001	0	0	0.0016	0.0036	0.0048	0.027	0.026	0.026	0.03	0.021	0	0	0.004	0.004	0.004	0.005	0.003	0	0	0	0	0	0	0	0	0	0.372	0.358	0.361	0.424	0.296	0	0	0.277	0.267	0.269	0.295	0.216	0	0	0.202	0.194	0.196	0.215	0.158
ALB	1.2	Refineries	0.1504	0.1552	0.16	0.1592	0.1584	0.1576	0.1568	0.042	0.046	0.045	0.049	0.049	0.041	0.041	0.088	0.096	0.094	0.102	0.1	0.083	0.083	0	0	0	0	0	0	0	0.407	0.417	0.392	0.468	0.423	0.367	0.367	0.46	0.493	0.48	0.537	0.518	0.438	0.438	0.325	0.353	0.347	0.381	0.375
ALB	2.1	Residential combustion (including commercial/institutional)	1.59729	1.59529	1.59729	1.59949	1.60289	1.60569	1.60849	51.573	55.309	55.51	55.541	50.974	50.857	50.857	10.323	11.076	11.11	11.117	10.198	10.172	10.172	0.043	0.046	0.046	0.046	0.043	0.043	0.043	1.156	1.187	1.012	1.089	0.907	0.992	0.992	7.424	7.967	7.752	7.782	7.077	7.183	7.183	7.147	7.656	7.607	7.622	6.973
ALB	2.2	Agricultural stationary combustion	0	0	0	0	0	0	0	0.12	0.125	0.101	0.083	0.152	0.125	0.125	0.03	0.026	0.018	0.014	0.028	0.02	0.02	0	0.001	0.001	0.001	0.001	0.001	0.001	0.301	0.25	0.178	0.132	0.276	0.186	0.186	0.366	0.292	0.202	0.146	0.314	0.202	0.202	0.136	0.113	0.08	0.059	0.124
ALB	34.1	Iron and steel industry (including coke ovens)	0	0	0	0	0	0	0	18.134	22.856	15.739	25.891	25.942	26.061	26.061	0.005	0.006	0.007	0.007	0.008	0.012	0.012	0	0	0	0	0	0	0	0.34	0.426	0.344	0.422	0.426	0.435	0.435	2.687	3.391	2.544	3.529	3.53	3.533	3.533	1.855	2.34	1.757	2.437	2.438
ALB	34.2	Non-ferrous metal industry	0	0	0	0	0	0	0	0	0	0	0	0	0	0	0	0	0	0	0	0	0	0	0	0	0	0	0	0	0	0	0	0	0	0	0	0	0	0	0	0	0	0	0	0	0	0	0
ALB	34.3	Chemical industry	0	0	0	0	0	0	0	0	0	0	0	0	0	0	0	0	0	0	0	0	0	0	0	0	0	0	0	0	0	0	0	0	0	0	0	0	0	0	0	0	0	0	0	0	0	0	0
ALB	34.4	Paper and pulp industry	0	0	0	0	0	0	0	0	0	0	0	0	0	0	0	0	0	0	0	0	0	0	0	0	0	0	0	0	0	0	0	0	0	0	0	0	0	0	0	0	0	0	0	0	0	0	0
ALB	34.5	Cement industry	0	0	0	0	0	0	0	0	0	0	0	0	0	0	0	0	0	0	0	0	0	0	0	0	0	0	0	0	0	0	0	0	0	0	0	0.044	0.036	0.101	0.121	0.173	0.225	0.225	0.024	0.02	0.056	0.067	0.095
ALB	34.6	Other non-metallic minerals industry	0	0	0	0	0	0	0	0	0	0	0	0	0	0	0	0	0	0	0	0	0	0	0	0	0	0	0	0	0	0	0	0	0	0	0	0.059	0.066	0.072	0.089	0.089	0.107	0.107	0.011	0.014	0.014	0.018	0.018
ALB	34.7	Storage and handling in industry	0	0	0	0	0	0	0	0	0	0	0	0	0	0	0	0	0	0	0	0	0	0	0	0	0	0	0	0	0	0	0	0	0	0	0	0	0	0	0	0	0	0	0	0	0	0	0
ALB	34.8	Other industries	0.0304	0.0202	0.01	0.0112	0.0152	0.019	0.022	0.723	0.388	0.895	0.936	1.738	2.052	2.052	1.049	0.922	0.92	0.725	1.113	0.919	0.919	0	0	0	0	0	0	0	0.472	0.303	0.72	0.762	1.414	1.687	1.687	0.386	0.109	0.191	0.244	0.249	0.258	0.258	0.257	0.072	0.126	0.16	0.164
ALB	5.1	Coal production	0.1348	0.1324	0.13	0.1328	0.1356	0.1384	0.1412	0	0	0	0	0	0	0	0.017	0.017	0.014	0.014	0.012	0.012	0.012	0	0	0	0	0	0	0	0	0	0	0	0	0	0	0	0	0	0	0	0	0	0	0	0	0	0
ALB	5.2	Oil production	0	0	0	0	0	0	0	0	0	0	0	0	0	0	0.842	1.039	0.98	1.17	1.323	1.323	1.323	0	0	0	0	0	0	0	0	0	0	0	0	0	0	0	0	0	0	0	0	0	0	0	0	0	0
ALB	5.3	Gas production	0.124	0.137	0.15	0.1664	0.1828	0.1992	0.2156	0	0	0	0	0	0	0	0.004	0.004	0.004	0.004	0.004	0.004	0.004	0	0	0	0	0	0	0	0	0	0	0	0	0	0	0	0	0	0	0	0	0	0	0	0	0	0
ALB	5.4	Gasoline distribution	0	0	0	0	0	0	0	0	0	0	0	0	0	0	0.212	0.291	0.32	0.322	0.263	0.263	0.263	0	0	0	0	0	0	0	0	0	0	0	0	0	0	0	0	0	0	0	0	0	0	0	0	0	0
ALB	5.5	Flaring	0	0	0	0	0	0	0	0	0	0	0	0	0	0	0	0	0	0	0	0	0	0	0	0	0	0	0	0	0	0	0	0	0	0	0	0	0	0	0	0	0	0	0	0	0	0	0
ALB	6.1	Solvent and other product use	0	0	0	0	0	0	0	0	0	0	0	0	0	0	8.911	9.556	9.898	10.067	10.934	11.24	11.24	0	0	0	0	0	0	0	0	0	0	0	0	0	0	0	0	0	0	0	0	0	0	0	0	0	0
ALB	7.1	Road transport, light duty vehicles	0.42	0.435	0.45	0.4166	0.3832	0.3498	0.3164	51.351	71.911	75.796	72.62	63.891	65.855	65.855	5.608	7.762	8.27	7.991	6.932	7.046	7.046	0.114	0.159	0.174	0.175	0.143	0.146	0.146	10.148	14.164	13.898	11.861	12.314	12.859	12.859	1.592	2.281	2.062	1.528	1.929	2.103	2.103	1.592	2.281	2.062	1.528	1.929
ALB	7.2	Road transport, heavy duty vehicles	0	0	0	0	0	0	0	0.515	0.782	0.806	0.658	0.613	0.766	0.766	0.129	0.195	0.202	0.164	0.153	0.191	0.191	0.004	0.006	0.006	0.005	0.005	0.006	0.006	2.319	3.518	3.628	2.961	2.757	3.445	3.445	0.103	0.156	0.161	0.132	0.123	0.153	0.153	0.103	0.156	0.161	0.132	0.123
ALB	7.3	Road transport, mopeds and motorcycles	0	0	0	0	0	0	0	0	0	0	0	0	0	0	0	0	0	0	0	0	0	0	0	0	0	0	0	0	0	0	0	0	0	0	0	0	0	0	0	0	0	0	0	0	0	0	0
ALB	7.4	Road transport, gasoline evaporation	0	0	0	0	0	0	0	0	0	0	0	0	0	0	0.236	0.24	0.243	0.262	0.302	0.307	0.307	0	0	0	0	0	0	0	0	0	0	0	0	0	0	0	0	0	0	0	0	0	0	0	0	0	0
ALB	7.5	Road transport, wear	0	0	0	0	0	0	0	0	0	0	0	0	0	0	0	0	0	0	0	0	0	0	0	0	0	0	0	0	0	0	0	0	0	0	0	0.179	0.254	0.238	0.19	0.216	0.232	0.232	0.097	0.137	0.129	0.103	0.117
ALB	8.1	Air transport (<1000m)	0	0	0	0	0	0	0	0.034	0.08	0.095	0.095	0.108	0.114	0.114	0.001	0.003	0.004	0.004	0.005	0.005	0.005	0	0	0	0	0	0	0	0.024	0.056	0.067	0.067	0.076	0.08	0.08	0	0	0.001	0.001	0.001	0.001	0.001	0	0	0.001	0.001	0.001
ALB	8.2	Rail transport	0.002	0.001	0	0	0.0012	0.0018	0.0024	0.022	0.02	0.02	0.021	0.018	0.016	0.016	0.01	0.009	0.009	0.009	0.008	0.007	0.007	0	0	0	0	0	0	0	0.109	0.1	0.096	0.102	0.089	0.081	0.081	0.003	0.003	0.003	0.003	0.002	0.002	0.002	0.003	0.003	0.003	0.003	0.002
ALB	8.3	Navigation, non-international	0	0	0	0	0	0	0	0.0125813	0.0125813	0.0125813	0.0125813	0.0125813	0.0125813	0.0125813	0	0	0	0	0	0	0	0	0	0	0	0	0	0	0	0	0	0	0	0	0	0	0	0	0	0	0	0	0	0	0	0	0
ALB	8.4	Mobile machinery, agriculture	0.0036	0.0018	0	0.0014	0.0028	0.0042	0.0056	1.072	0.794	0.707	1.208	0.483	0.483	0.483	0.33	0.244	0.218	0.372	0.148	0.148	0.148	0.001	0.001	0.001	0.001	0	0	0	3.435	2.542	2.265	3.868	1.546	1.546	1.546	0.17	0.126	0.112	0.192	0.077	0.077	0.077	0.17	0.126	0.112	0.192	0.077
ALB	8.5	Mobile machinery, industry	0	0	0	0	0	0	0	0	0	0	0	0	0	0	0	0	0	0	0	0	0	0	0	0	0	0	0	0	0	0	0	0	0	0	0	0	0	0	0	0	0	0	0	0	0	0	0
ALB	8.6	Other mobile sources	0	0	0	0	0	0	0	0	0	0	0	0	0	0	0	0	0	0	0	0	0	0	0	0	0	0	0	0	0	0	0	0	0	0	0	0	0	0	0	0	0	0	0	0	0	0	0
ALB	9.1	Landfills	24.7996	24.5198	24.24	24.532	24.824	25.116	25.408	0.001	0.001	0.001	0.001	0.001	0.001	0.001	0.078	0.082	0.088	0.093	0.099	0.105	0.105	0.061	0.065	0.069	0.073	0.078	0.082	0.082	0	0	0	0	0	0	0	0	0	0	0	0	0	0	0	0	0	0	0
ALB	9.2	Controlled waste incineration	0	0	0	0	0	0	0	0	0	0	0	0	0	0	0	0	0	0	0	0	0	0	0	0	0	0	0	0	0	0	0	0	0	0	0	0	0	0	0	0	0	0	0	0	0	0	0
ALB	9.3	Other waste treatment	5.1568	5.3484	5.54	5.6086	5.6772	5.7458	5.8144	0	0	0	0	0	0	0	0	0	0	0	0	0	0	0	0	0	0	0	0	0	0	0	0	0	0	0	0	0	0	0	0	0	0	0	0	0	0	0	0
ALB	10.1	Livestock, Cattle	53.4508	52.4604	51.47	52.9204	54.3708	55.8212	57.2716	0	0	0	0	0	0	0	0	0	0	0	0	0	0	16.022	15.309	15.339	14.841	13.507	12.672	12.672	0	0	0	0	0	0	0	0.303	0.289	0.29	0.28	0.256	0.24	0.24	0.195	0.186	0.187	0.181	0.165
ALB	10.2	Livestock, Poultry	0.1144	0.1172	0.12	0.13	0.14	0.15	0.16	0	0	0	0	0	0	0	0	0	0	0	0	0	0	0.821	1.01	1.016	0.949	1.336	1.671	1.671	0	0	0	0	0	0	0	0.073	0.081	0.082	0.079	0.099	0.117	0.117	0.011	0.012	0.012	0.012	0.015
ALB	10.3	Livestock, Sheep	0	0	0	0	0	0	0	0	0	0	0	0	0	0	0	0	0	0	0	0	0	2.664	2.512	2.464	2.562	2.594	2.52	2.52	0	0	0	0	0	0	0	0.343	0.323	0.317	0.329	0.334	0.324	0.324	0.055	0.052	0.051	0.053	0.054
ALB	10.4	Livestock, Goats	0	0	0	0	0	0	0	0	0	0	0	0	0	0	0	0	0	0	0	0	0	2.017	1.887	1.837	1.316	1.226	1.148	1.148	0	0	0	0	0	0	0	0.259	0.243	0.236	0.169	0.158	0.148	0.148	0.042	0.039	0.038	0.027	0.025
[truncated: 523 more rows]
[truncated: 9 more columns]
