# Supplementary material for: TNO-MACC_II emission inventory; a multi-year (2003–2009) consistent high-resolution European emission inventory for air quality modelling
Source: Copernicus journal article supplement (doi:10.5194/acp-14-10963-2014), 2014-10-17
Supplement: Supplementary file 9 [file 5_Emissions_EC_OC_clean.xlsx]

## Sheet: EC_OC_emissions
		This sheet shows EC and OC emissions (kton) by country and year, for fine and coarse mode. Emissions are calculated by applying the PM split described in the paper to the emission time series for 2003-2009 at sub-sector level.
		EC_fine	EC_fine	EC_fine	EC_fine	EC_fine	EC_fine	EC_fine	OC_fine	OC_fine	OC_fine	OC_fine	OC_fine	OC_fine	OC_fine	EC_coarse	EC_coarse	EC_coarse	EC_coarse	EC_coarse	EC_coarse	EC_coarse	OC_coarse	OC_coarse	OC_coarse	OC_coarse	OC_coarse	OC_coarse	OC_coarse
		Fine mode (<2.5um)														Fine mode (<2.5um)
		Elemental carbon (EC)							Organic carbon (OC)							Elemental carbon (EC)							Organic carbon (OC)
Country (ISO3)		2003	2004	2005	2006	2007	2008	2009	2003	2004	2005	2006	2007	2008	2009	2003	2004	2005	2006	2007	2008	2009	2003	2004	2005	2006	2007	2008	2009
EU15, including Norway and Switzerland	AUT	6.50662	6.34381	6.48611	5.95813	5.64781	5.28873	4.8946	6.15498	6.00791	6.20766	5.77417	5.61886	5.52828	5.302	0.671441	0.664545	0.716107	0.668405	0.645661	0.642627	0.596936	1.10352	1.12032	1.13419	1.14547	1.15359	1.15392	1.12511
	BEL	8.32728	8.12683	7.57693	7.17852	5.70006	5.37141	4.63598	6.04239	5.94298	5.6781	5.46804	4.85039	4.72175	4.33353	2.28403	2.30567	1.00375	0.876055	0.781071	0.723831	0.53103	2.13884	2.17004	2.07731	2.03114	2.0644	2.06504	2.01513
	CHE	2.95386	2.86868	2.84278	2.73956	2.56088	2.44105	2.33413	3.06023	2.96454	2.93416	2.82284	2.61359	2.59258	2.50455	2.32725	2.32663	2.32902	2.33757	2.34625	2.33167	2.30968	1.92861	1.96419	2.01811	2.0085	2.02367	2.04387	2.07191
	DEU	28.352	27.4148	25.7325	24.7382	21.9994	19.5014	17.4111	26.9958	25.9225	25.0804	24.9818	23.2808	22.7745	21.8579	2.5283	2.44305	2.25884	2.22913	2.1502	1.16427	1.02504	15.2601	15.2197	15.3256	15.2554	15.5514	15.3651	15.5808
	DNK	5.56601	5.54713	5.77173	5.92063	6.46715	5.89557	5.22329	10.0133	10.3377	11.2637	11.8184	13.6902	12.5996	11.5399	0.406617	0.342987	0.298768	0.38614	0.38268	0.35235	0.312204	3.6692	3.67548	3.73064	3.65305	3.58975	3.32765	3.32198
	ESP	28.8908	28.1671	27.4901	26.5037	26.1534	23.9496	21.6638	34.9996	33.9984	32.857	32.4178	32.4143	31.3948	30.6415	3.40096	3.33224	3.05929	2.96108	2.79282	2.13351	1.98799	12.4967	12.7881	12.7654	12.852	13.3694	12.7874	12.4673
	FIN	7.94049	7.37966	7.18238	7.85085	7.28089	8.62039	8.64484	12.375	12.0651	11.2566	11.6715	11.6907	13.3099	13.8652	1.88037	1.80029	1.8184	2.609	1.80362	2.09765	1.97909	1.96935	2.62359	2.56282	2.58503	1.169	1.1739	1.11606
	FRA	74.1842	68.3287	61.9623	57.4734	53.3978	51.88	49.2505	119.849	116.611	109.809	100.783	94.2735	94.0459	90.8843	10.7231	9.97504	9.49316	9.18323	8.86863	8.74102	8.38787	19.7071	19.62	19.386	19.2266	19.5449	19.5222	19.4834
	GBR	27.0104	26.2566	25.1733	23.9029	22.702	21.0444	19.3302	19.1277	18.85	18.358	17.9895	17.6408	17.1868	16.2954	5.30011	5.15481	4.97267	4.82536	4.65803	4.32291	3.89803	8.89625	9.03174	8.6973	8.73203	8.58073	8.5292	8.17471
	GRC	9.38158	9.31064	9.23961	8.95221	8.66469	8.3772	8.08966	14.7581	14.7115	14.6659	14.5116	14.3574	14.2032	14.049	2.72408	2.6461	2.569	2.42935	2.29003	2.15064	2.01151	2.04187	2.06343	2.08502	2.07431	2.06364	2.05287	2.04217
	IRL	3.61056	3.55745	3.40859	3.2391	3.16072	3.01493	2.76761	2.16677	2.14197	2.15541	2.0494	2.00736	1.96621	1.83138	0.593357	0.579389	0.609286	0.552282	0.502319	0.493276	0.431709	0.235177	0.250175	0.256477	0.263414	0.267631	0.271554	0.245728
	ITA	43.1948	43.1772	38.8405	36.9279	37.4098	35.1393	33.9316	45.6458	49.393	45.7381	45.7761	50.5883	50.6459	52.2033	1.08515	1.11434	1.0824	1.04232	0.997344	0.955361	0.903809	10.0206	9.71704	9.68818	9.25884	9.8216	10.1078	10.1909
	LUX	1.10364	1.1924	1.28149	1.21635	1.15122	1.08609	1.02096	0.637695	0.662024	0.685966	0.655821	0.625676	0.596245	0.566137	0.036779	0.0363972	0.0349797	0.0346591	0.0343386	0.0334333	0.0331739	0.23942	0.247409	0.255387	0.25668	0.257972	0.258551	0.259807
	NLD	6.5906	6.27583	6.06752	5.75013	5.56791	5.28575	4.80169	4.19975	4.04806	3.93102	3.8294	3.76263	3.62899	3.40486	0.550777	0.574081	0.455084	0.524626	0.444191	0.40947	0.374089	3.29788	3.72338	3.88958	3.86085	4.08883	4.21444	4.21859
	NOR	9.79235	9.14524	8.69467	8.47851	8.11677	7.80229	7.7434	28.7504	26.1768	24.1328	23.2115	21.7686	20.6986	20.8545	0.484137	0.467452	0.504467	0.507577	0.542237	0.434206	0.473862	0.456256	0.463812	0.481063	0.451606	0.479168	0.41156	0.363723
	PRT	9.62743	9.61756	9.29448	9.07189	8.82628	8.72795	8.47441	18.3121	18.6431	18.614	17.9374	17.8025	17.5267	17.2321	1.07464	1.06183	1.05329	1.0363	0.987277	0.935397	0.901689	0.0549208	0.0526647	0.0525714	0.0528566	0.0517292	0.0505339	0.0516262
	SWE	4.97336	4.74851	4.60074	4.35048	4.28526	4.12482	4.22976	6.27314	6.09569	6.10552	5.8097	5.87268	5.85683	6.02565	0.576053	0.582404	0.541147	0.539029	0.521763	0.498647	0.473419	1.95724	1.97652	1.95524	1.95351	2.00151	2.00281	1.93989
EU13 (New Member States)	BGR	6.19137	6.34328	6.49555	6.2563	6.01713	5.77791	5.53876	11.2612	11.4146	11.569	11.4001	11.231	11.0624	10.8941	2.26412	2.21762	2.1718	1.92582	1.67973	1.43371	1.18756	1.6227	1.62198	1.62129	1.58007	1.53882	1.49705	1.45569
	CYP	1.12375	0.712172	0.49287	0.460189	0.455053	0.421269	0.364332	0.514011	0.375362	0.302615	0.283693	0.296531	0.273439	0.247435	0.0448641	0.0441965	0.0458185	0.0430947	0.0440806	0.0339018	0.0290257	0.24934	0.231185	0.226916	0.208018	0.216311	0.215383	0.210636
	CZE	8.7453	8.41678	8.08887	8.21301	8.33766	8.46247	8.58717	13.3326	12.8709	12.4094	12.2424	12.0755	11.9086	11.7417	2.27595	2.16711	2.05757	1.98377	1.90949	1.83504	1.76022	2.6016	2.57146	2.54131	2.53925	2.53719	2.53513	2.53305
	EST	3.53948	3.63281	3.30459	2.86596	3.57542	3.47535	3.42081	7.38451	7.43271	6.72254	6.08979	7.55289	7.75845	7.89584	1.28574	1.02308	0.878412	0.737489	1.01416	0.58303	0.62783	0.287729	0.286171	0.26902	0.248341	0.278047	0.239108	0.223743
	HRV	3.02968	3.10251	3.23258	2.96857	2.88868	2.61741	2.54071	4.48574	4.47396	4.38675	4.29666	3.97817	3.91438	3.96278	0.411805	0.41375	0.426769	0.390491	0.441359	0.34781	0.424175	0.646943	0.687967	0.609547	0.683223	0.657039	0.591315	0.607133
	HUN	6.57738	6.39767	6.21813	6.12204	6.02574	5.92941	5.83332	10.3813	10.1439	9.90691	9.79574	9.68409	9.5729	9.46175	1.03349	0.881274	0.730147	0.717927	0.705789	0.693819	0.680658	3.12576	3.1208	3.11588	3.10833	3.1008	3.09326	3.08572
	LTU	2.67534	2.71148	2.74789	2.69799	2.64793	2.59836	2.54911	5.18843	5.22337	5.25902	5.22005	5.18163	5.14407	5.10721	0.440924	0.431691	0.422411	0.408021	0.393874	0.379465	0.365059	0.909411	0.930003	0.950592	0.943609	0.936054	0.928928	0.92181
	LVA	3.07202	3.14064	3.20925	3.17021	3.13122	3.09215	3.05328	7.84067	7.86916	7.89723	7.87856	7.85963	7.8404	7.82158	0.380166	0.370993	0.361293	0.357142	0.353137	0.349046	0.344936	0.486668	0.493041	0.499892	0.498283	0.496675	0.495066	0.493467
	MLT	0.616955	0.603355	0.639436	0.654152	0.664096	0.672707	0.673155	0.309964	0.304796	0.321541	0.325935	0.330894	0.334861	0.334829	0.107605	0.121887	0.139249	0.127528	0.128507	0.177021	0.178944	0.0613452	0.062631	0.0626861	0.054878	0.0553287	0.0516588	0.0516588
	POL	32.6711	30.9202	31.2389	33.8049	32.45	32.4115	32.6204	33.0837	30.4549	31.6192	31.9601	29.9611	30.3457	30.6255	22.7056	20.9851	20.7949	21.0412	19.4107	18.3837	17.8809	11.8648	10.9184	11.1357	12.1298	10.529	9.4027	9.0947
	ROU	20.6262	20.4715	20.3162	19.6175	18.9193	18.2212	17.5229	48.4477	48.4127	48.3775	47.9942	47.6112	47.2289	46.8459	5.01432	5.0489	5.08355	4.44823	3.81254	3.17637	2.54002	6.06548	6.20866	6.35185	6.21776	6.08368	5.94958	5.8155
	SVK	4.30304	4.61234	6.17367	5.71918	5.39155	5.12483	5.10646	8.58489	10.4639	14.8949	13.9174	14.1039	14.1673	14.2023	1.03978	0.595815	1.03707	1.03967	0.912261	0.870669	0.765152	0.280474	0.152791	0.285591	0.307204	0.270385	0.222828	0.25095
	SVN	3.37009	3.42499	3.55466	3.51596	3.56284	3.71349	3.49763	5.90631	5.93008	6.02602	6.0384	6.04248	5.91609	5.80816	0.116986	0.112772	0.113231	0.0967292	0.0964782	0.100849	0.0975275	0.753228	0.719711	0.722233	0.790616	0.806319	0.558094	0.546456
Other countries	ALB	2.64719	3.22915	3.08017	2.72121	2.84574	2.96387	2.96327	5.41873	5.8645	5.69286	5.62036	5.28455	5.4208	5.42082	0.141177	0.156186	0.0806217	0.0866833	0.0732066	0.128115	0.12863	0.22318	0.238442	0.231557	0.230803	0.239306	0.251641	0.251536
	ARM	0.237121	0.258408	0.224869	0.220453	0.187334	0.189082	0.00078	0.66345	0.710103	0.623611	0.617565	0.523812	0.476182	0.00052	0.0312311	0.0365011	0.0331629	0.0329606	0.0295459	0.028458	0	0.234209	0.305388	0.272063	0.275701	0.231752	0.213984	0
	AZE	0.916272	1.05052	1.10085	0.885801	0.750846	0.793795	0	2.19455	2.46836	2.33515	1.92273	1.82292	1.85794	0	0.158213	0.166755	0.162929	0.13721	0.127873	0.141127	0	0.89316	1.03102	0.975297	0.824139	0.802771	0.823245	0
	BIH	2.88051	2.98107	3.08163	2.95094	2.82025	2.68957	2.55888	3.75896	3.94485	4.13074	4.0855	4.04025	3.99501	3.94977	1.72306	1.75948	1.7959	1.71548	1.63506	1.55465	1.47423	0.712413	0.731643	0.750873	0.746044	0.741216	0.736387	0.731558
	BLR	7.74862	7.71212	7.67652	7.6381	7.60007	7.5619	7.52367	19.3633	19.5358	19.7059	19.6525	19.5994	19.5465	19.4937	1.54963	1.49024	1.43125	1.42105	1.41077	1.40029	1.39038	2.94112	2.89706	2.85303	2.93013	3.00715	3.08414	3.16117
	GEO	2.43555	2.41838	2.40559	2.4716	2.75332	2.91205	0	8.74313	8.67228	8.58874	8.28141	8.37975	8.3537	0	0.189623	0.194146	0.195804	0.18431	0.191648	0.192204	0	0.338893	0.353549	0.354818	0.266483	0.309827	0.313931	0
	ISL	0.136764	0.132266	0.127768	0.123008	0.117945	0.113194	0.108444	0.152733	0.151618	0.150503	0.190018	0.229433	0.268951	0.308469	0.0172367	0.0163976	0.0156626	0.0148132	0.014558	0.0131613	0.0123715	0.0590542	0.0586323	0.0582207	0.0740467	0.0898727	0.105699	0.121525
	MDA	1.61571	1.64967	1.68382	1.67909	1.6743	1.66959	1.66484	3.40239	3.42703	3.45292	3.4442	3.43548	3.42658	3.41795	0.327006	0.326151	0.324653	0.322638	0.320752	0.318615	0.316657	0.828129	0.83478	0.841439	0.833495	0.825559	0.817073	0.809072
	MKD	1.58952	1.58192	1.57443	1.57123	1.56796	1.56461	1.56137	2.53899	2.53526	2.53153	2.52624	2.52083	2.51481	2.50971	1.00081	0.974393	0.9481	0.939004	0.929892	0.92204	0.912923	0.394693	0.380878	0.367045	0.366591	0.366137	0.365692	0.365228
	RUS	144.716	148.333	151.951	147.858	143.765	139.672	135.579	194.779	193.182	191.584	190.464	189.344	188.223	187.103	26.6376	27.5332	28.4274	28.3728	28.3177	28.2632	28.2085	24.7129	24.4608	24.2086	24.3294	24.4502	24.571	24.6919
	TUR	42.6222	42.4624	42.3032	43.5075	44.7112	45.9156	47.1199	109.151	110.468	111.785	110.281	108.778	107.274	105.77	9.53875	9.22458	8.91168	9.12323	9.33538	9.54696	9.75801	11.3802	11.6351	11.89	12.1531	12.4162	12.6794	12.9425
	UKR	47.3993	47.152	46.9038	46.4476	45.9913	45.5346	45.0784	90.583	90.4782	90.3736	90.0443	89.715	89.3856	89.0563	17.7442	17.5875	17.4317	17.0924	16.7541	16.4164	16.0783	13.6588	13.5221	13.3854	13.3805	13.3756	13.3708	13.3655
	YUG	8.41086	8.55123	8.69166	8.50989	8.32913	8.14837	7.96755	21.162	21.074	20.9867	20.8337	20.6807	20.5277	20.374	4.74312	4.55978	4.37592	4.1531	3.92832	3.70446	3.48069	2.48052	2.38748	2.29444	2.24882	2.2032	2.1575	2.11188
Sea regions	ATL	6.28546	6.43347	6.58146	6.7455	6.90948	7.07347	7.23745	18.8564	19.3004	19.7444	20.2365	20.7285	21.2204	21.7123	0.348764	0.356745	0.364728	0.374835	0.384715	0.394746	0.404808	1.04629	1.07024	1.09419	1.12451	1.15415	1.18424	1.21443
	BAS	2.45309	2.51109	2.5691	2.34707	2.13307	1.92706	1.72106	7.35928	7.53326	7.70729	7.04121	6.39921	5.78119	5.16319	0.136693	0.140686	0.144687	0.131841	0.119422	0.107419	0.0954224	0.410079	0.422058	0.434061	0.395523	0.358267	0.322258	0.286267
	BLS	0.717459	0.733453	0.749451	0.76747	0.785458	0.803459	0.821454	2.15238	2.20036	2.24835	2.30241	2.35637	2.41038	2.46436	0.0410181	0.0410181	0.0410181	0.0430181	0.0450181	0.0470281	0.0490151	0.123054	0.123054	0.123054	0.129054	0.135054	0.141084	0.147045
	MED	13.5876	13.9196	14.2516	14.5416	14.8316	15.1216	15.4116	40.7627	41.7587	42.7548	43.6247	44.4947	45.3647	46.2347	0.76196	0.779955	0.797953	0.813968	0.829968	0.845966	0.861988	2.28588	2.33987	2.39386	2.44191	2.48991	2.5379	2.58597
	NOS	5.81548	5.94949	6.08347	5.59947	5.10977	4.56312	4.04028	17.4464	17.8485	18.2504	16.7984	15.3293	13.6894	12.1208	0.349777	0.357775	0.36578	0.337776	0.308987	0.272137	0.23804	1.04933	1.07332	1.09734	1.01333	0.92696	0.816411	0.71412
